# Supplementary material for: Membrane Localization of RNase Y Is Important for Global Gene Expression in Bacillus subtilis
Source: Preprints.org preprint supplement (doi:10.20944/preprints202407.0751.v1), 2024-07-09
Supplement: Supplementary file 1 [file supplementary]

## Sheet: Table S1 Mapping statistics
Table S1
RNA-Seq mapping statistics
Strain	Sample ID	Raw sequences reads	Mapped reads	Mapping ratio
WT	T1	16075959	15149183	94.235
	T2	17383427	16325409	93.9136
	T3	14112416	13500978	95.6674
∆rny	T4	15178610	14376478	94.7154
	T5	17951741	17165076	95.6179
	T6	16780258	15966703	95.1517
∆TMD	T7	14704875	13501034	91.8133
	T8	17474888	16106404	92.1689
	T9	15521264	14764699	95.1256

## Sheet: Table S2 COG analysis
Table S2
Clusters of Orthologous Genes (COG) Analysis
	∆rny vs WT	ΔTMD vs WT
up (FC ≥ 2; FDR ≤ 0.05)	712	665
down (FC ≤ -2 FDR ≤ 0.05)	751	652
total DEG	1463	1317
	∆rny vs WT		ΔTMD vs WT
COG	up	down	up	down
Carbohydrate transport and metabolism	24	78	53	55
Coenzyme transport and metabolism	40	24	17	22
Transcription	44	41	33	21
Cell wall/membrane/envelope biogenesis	51	31	20	32
Inorganic ion transport and metabolism	21	39	27	30
Amino acid transport and metabolism	41	71	36	54
Signal transduction mechanisms	27	18	24	18
Lipid transport and metabolism	14	9	27	18
Replication, recombination and repair	34	4	16	15
Energy production and conversion	13	46	24	31
Posttranslational modification, protein turnover, chaperones	20	15	23	18
Translation, ribosomal structure and biogenesis	32	30	17	56
Nucleotide transport and metabolism	16	25	13	11
Secondary metabolites biosynthesis, transport and catabolism	8	6	11	9
Cell cycle control, cell division, chromosome partitioning	17	8	1	11
Defense mechanisms	12	22	11	18
Mobilome: prophages, transposons	5	0	8	1
Intracellular trafficking, secretion, and vesicular transport	4	7	2	3
Cell motility	4	34	1	29
Chromatin structure and dynamics|Secondary metabolites biosynthesis, transport and catabolism	0	0	0	0
Cytoskeleton	0	0	0	0
tRNA	0	40	24	0
undefined	207	145	224	137
Function unknown	47	33	28	33
General function prediction only	39	30	40	35

## Sheet: Table S3 Mutants vs WT corr
Table S3
Differential gene expression analysis. List of up- and down-regulated transcripts (sense coverage)
color code	red	up regulated FC ≥ 2			SP-beta phage
	blue	down regulated FC ≤ -2			PBSX phage
	yellow	FDR ≤ 0,05		TMD	1: one transmembrane domain; Yes: 2 or more transmembrane domains							∆rny vs WT			ΔTMD vs WT			∆rny vs WT		ΔTMD vs WT
Function			Prot accession	TMD	geneName	strand	start	end	length	type	logCPM	logFC	PValue	FDR	logFC	PValue	FDR	FC	FDR	FC	FDR	WT levels
conserved hypothetical protein, phage SPbeta	undefined	undefined	NP_389894.1	-	yosH	-	2167039	2167509	471	CDS	2.48738	4.81318	0.00147621	0.00490676	9.3156	1.09014e-16	1.06548e-14	28.1133	0.00490676	637.198	1.06548e-14	0
hypothetical protein, phage SPbeta	undefined	undefined	NP_389891.1	-	yosK	-	2166413	2166613	201	CDS	1.85083	4.55711	0.0023724	0.00729489	8.65924	6.07048e-18	7.32922e-16	23.5412	0.00729489	404.288	7.32922e-16	0
hypothetical protein, phage SPbeta	undefined	undefined	NP_389893.1	-	yosI	-	2166873	2167007	135	CDS	1.2548	3.33779	0.0461458	0.0904194	8.12295	2.79086e-15	2.12157e-13	10.1106	0.0904194	278.773	2.12157e-13	0
conserved hypothetical protein, phage SPbeta	undefined	undefined	NP_389953.1	1	yopZ	-	2201488	2201691	204	CDS	0.780132	4.4219	0.00402154	0.0114483	7.30817	3.06302e-10	7.79734e-09	21.435	0.0114483	158.482	7.79734e-09	0
putative cell wall hydrolase, phage SPbeta	undefined	undefined	NP_389895.1	-	yosG	-	2167570	2167932	363	CDS	1.90683	2.56542	0.0203499	0.0458739	6.723	4.68983e-18	5.83386e-16	5.91929	0.0458739	105.639	5.83386e-16	0.0683681
putative HU-related DNA-binding protein, phage SPbeta	COG0776	Replication, recombination and repair	NP_389988.1	-	yonN	+	2225337	2225615	279	CDS	5.13189	5.08208	1.83119e-14	5.48688e-13	6.40481	1.52782e-21	3.91981e-19	33.8734	5.48688e-13	84.7304	3.91981e-19	0.461965
hypothetical protein, phage SPbeta	undefined	undefined	NP_389897.1	yes	yosE	-	2168114	2168461	348	CDS	1.53285	1.17728	0.37846	0.493984	6.17402	1.53311e-10	4.1404e-09	2.2615	0.493984	72.2045	4.1404e-09	0.0995393
hypothetical protein, phage SPbeta	undefined	undefined	NP_389896.1	-	yosF	-	2167975	2168100	126	CDS	-0.207733	1.70486	0.31161	0.422583	6.06019	1.0646e-06	1.07769e-05	3.25997	0.422583	66.7267	1.07769e-05	0
hypothetical protein, phage SPbeta	undefined	undefined	NP_389898.1	-	yosD	-	2168476	2168871	396	CDS	1.3993	2.45037	0.0272271	0.0585868	6.02734	7.42503e-15	5.16606e-13	5.46555	0.0585868	65.2242	5.16606e-13	0.0683681
ATP-dependent Clp protease (class III stress gene)	COG0542	Posttranslational modification, protein turnover, chaperones	NP_389253.1	-	clpE	-	1435628	1437727	2100	CDS	9.28448	2.60445	1.88032e-14	5.59326e-13	5.85607	1.03027e-50	4.22925e-47	6.08158	5.59326e-13	57.9232	4.22925e-47	33.3775
hypothetical protein, phage SPbeta	undefined	undefined	NP_389890.1	-	yosL	-	2165972	2166325	354	CDS	1.28437	0.330693	0.814878	0.869763	5.80212	5.66808e-12	2.28112e-10	1.25762	0.869763	55.7972	2.28112e-10	0.0995393
conserved hypothetical protein, phage SPbeta	undefined	undefined	NP_389954.1	-	yopY	-	2201705	2201983	279	CDS	1.12015	1.50421	0.219777	0.319976	5.72572	7.85515e-15	5.37423e-13	2.83669	0.319976	52.9194	5.37423e-13	0.0786606
hypothetical protein, phage SPbeta	undefined	undefined	NP_389921.1	-	yorG	-	2184450	2185421	972	CDS	4.41684	1.19159	0.0470251	0.0919666	5.57841	1.1235e-20	2.30598e-18	2.28404	0.0919666	47.7824	2.30598e-18	1.22225
hypothetical protein, phage SPbeta	undefined	undefined	NP_389912.1	-	yorP	-	2174104	2174319	216	CDS	1.04017	2.32297	0.0417738	0.0832031	5.55884	2.97176e-11	9.68179e-10	5.0036	0.0832031	47.1387	9.68179e-10	0.0683681
putative SPbeta phage protein	undefined	undefined	NP_389930.1	-	yoqX	-	2191334	2191555	222	CDS	0.0725488	3.31372	0.0584654	0.110244	5.38349	0.000604388	0.00256568	9.94329	0.110244	41.7438	0.00256568	0
SPbeta phage subunit of nucleoside diphosphate reductase	COG1780	Nucleotide transport and metabolism	NP_389889.1	-	nrdIB	-	2165577	2165966	390	CDS	0.862793	1.21769	0.345058	0.459294	5.34909	1.60637e-10	4.30991e-09	2.32573	0.459294	40.7602	4.30991e-09	0.0786606
putative DNA-binding protein anti-repressor, phage SPbeta	COG3645	Mobilome: prophages, transposons	NP_389949.1	-	yoqD	-	2199580	2200335	756	CDS	2.03601	1.64458	0.0588163	0.110753	5.29653	1.2278e-14	8.12919e-13	3.12658	0.110753	39.3021	8.12919e-13	0.267447
conserved hypothetical protein, phage SPbeta	undefined	undefined	NP_389980.1	-	yonX	-	2217133	2217639	507	CDS	2.89524	0.489398	0.506824	0.614886	5.17774	4.17104e-16	3.7222e-14	1.40386	0.614886	36.1956	3.7222e-14	0.66075
hypothetical protein, phage SPbeta	undefined	undefined	NP_389900.1	-	yosB	-	2169497	2169676	180	CDS	1.79791	1.32252	0.148413	0.236596	5.159	1.082e-12	5.4166e-11	2.50102	0.236596	35.7283	5.4166e-11	0.246568
hypothetical protein, phage SPbeta	undefined	undefined	NP_389892.1	-	yosJ	-	2166658	2166852	195	CDS	1.40561	0.682782	0.54277	0.647695	5.15223	3.88017e-11	1.25418e-09	1.60523	0.647695	35.5611	1.25418e-09	0.157321
ribosomal RNA-5S	undefined	undefined			rrnI-5S	+	165591	165707	117	rRNA	2.11742	-1.1901	0.324184	0.436034	5.05321	2.01322e-06	1.84883e-05	-2.28169	0.436034	33.2022	1.84883e-05	0.38301
hypothetical protein, phage SPbeta	undefined	undefined	NP_389902.1	-	yorZ	-	2170030	2170242	213	CDS	1.27184	0.903128	0.414	0.529745	5.04887	7.82052e-10	1.76391e-08	1.87012	0.529745	33.1024	1.76391e-08	0.157321
conserved hypothetical protein, phage SPbeta	undefined	undefined	NP_389981.1	-	yonV	-	2217967	2219199	1233	CDS	4.61645	-0.495083	0.30668	0.417829	4.86608	1.36155e-26	1.11783e-23	-1.4094	0.417829	29.1632	1.11783e-23	2.98572
conserved hypothetical protein, phage SPbeta	undefined	undefined	NP_389899.1	-	yosC	-	2168910	2169452	543	CDS	2.09025	0.632463	0.436436	0.550405	4.76148	4.9596e-14	3.08472e-12	1.55021	0.550405	27.1236	3.08472e-12	0.435354
conserved hypothetical protein, phage SPbeta	undefined	undefined	NP_389945.1	1	yoqH	-	2198313	2198765	453	CDS	1.16934	3.14822	6.76999e-05	0.000323525	4.72733	3.10928e-12	1.37243e-10	8.86563	0.000323525	26.4891	1.37243e-10	0.157321
hypothetical protein, phage SPbeta	undefined	undefined	NP_389920.1	-	yorH	-	2183937	2184407	471	CDS	1.61476	0.231474	0.803128	0.860429	4.65629	4.41819e-12	1.85068e-10	1.17403	0.860429	25.2164	1.85068e-10	0.283765
putative permease	COG0697	Carbohydrate transport and metabolism|Amino acid transport and metabolism|General function prediction only	NP_388417.1	yes	ydfC	-	582536	583456	921	CDS	1.56977	1.48861	0.162129	0.252865	4.61215	1.32468e-07	1.72629e-06	2.80618	0.252865	24.4565	1.72629e-06	0.167907
PBSX defective prophage terminase (small subunit)	COG3728	Mobilome: prophages, transposons	NP_389139.1	-	xtmA	+	1325096	1325893	798	CDS	5.55518	3.68231	3.4834e-17	1.47416e-15	4.50782	7.76978e-24	2.89954e-21	12.8377	1.47416e-15	22.7503	2.89954e-21	4.14931
hypothetical protein, phage SPbeta	undefined	undefined	NP_389922.1	-	yorF	-	2185504	2186418	915	CDS	4.1491	1.11636	0.0249447	0.0547574	4.50389	3.54516e-20	6.61495e-18	2.16799	0.0547574	22.6885	6.61495e-18	1.94137
conserved hypothetical protein, phage SPbeta	undefined	undefined	NP_389989.1	-	yonK	+	2227297	2227488	192	CDS	0.695409	2.29687	0.0398346	0.0798833	4.47241	3.17181e-07	3.65738e-06	4.9139	0.0798833	22.1987	3.65738e-06	0.0786606
hypothetical protein, phage SPbeta	undefined	undefined	NP_389874.1	-	yotC	-	2155058	2155249	192	CDS	1.28657	0.753469	0.458348	0.570675	4.4632	8.8475e-08	1.23534e-06	1.68584	0.570675	22.0575	1.23534e-06	0.225689
hypothetical protein, phage SPbeta	undefined	undefined	NP_389911.1	-	yorQ	-	2173956	2174111	156	CDS	0.809899	-0.487793	0.709287	0.791417	4.45259	6.64099e-07	6.9544e-06	-1.4023	0.791417	21.896	6.9544e-06	0.157321
putative nucleotide kinase, phage SPbeta	COG0125	Nucleotide transport and metabolism	NP_389910.1	-	yorR	-	2173459	2173956	498	CDS	1.53906	1.2531	0.123056	0.204429	4.41811	1.01189e-11	3.81082e-10	2.38353	0.204429	21.3788	3.81082e-10	0.346107
hypothetical protein, phage SPbeta	undefined	undefined	NP_389948.1	-	yoqE	-	2199362	2199526	165	CDS	0.110098	-2.11916	0.180795	0.274966	4.41449	2.29466e-06	2.06569e-05	-4.34442	0.274966	21.3252	2.06569e-05	0.0786606
hypothetical protein, phage SPbeta	undefined	undefined	NP_389929.1	-	yoqY	-	2190884	2191279	396	CDS	1.08724	-0.0253079	0.986518	0.991343	4.39092	1.00874e-06	1.02752e-05	-1.0177	0.991343	20.9797	1.02752e-05	0.167907
hypothetical protein, phage SPbeta	undefined	undefined	NP_389952.1	-	yoqA	-	2201125	2201475	351	CDS	1.08293	1.22927	0.156892	0.247139	4.37803	2.99943e-12	1.33833e-10	2.34449	0.247139	20.7931	1.33833e-10	0.236275
putative nucleotide-binding protein, phage SPbeta	undefined	undefined	NP_389950.1	-	yoqC	-	2200376	2200783	408	CDS	0.216108	1.51744	0.227699	0.329237	4.35546	3.9585e-06	3.3095e-05	2.86283	0.329237	20.4702	3.3095e-05	0.0683681
hypothetical protein, phage SPbeta	undefined	undefined	NP_389955.1	-	yopX	-	2201980	2202384	405	CDS	1.58273	1.3626	0.0777516	0.139498	4.33668	2.37801e-13	1.33722e-11	2.57147	0.139498	20.2056	1.33722e-11	0.366986
hypothetical protein, phage SPbeta	undefined	undefined	NP_389946.1	-	yoqG	-	2198848	2199105	258	CDS	0.796763	1.63675	0.0906479	0.158258	4.28598	4.93957e-09	9.30134e-08	3.10966	0.158258	19.5079	9.30134e-08	0.147029
putative glycosyl hydrolase, phage SPbeta	COG4632	Carbohydrate transport and metabolism	NP_390022.1	-	yomE	+	2260333	2262267	1935	CDS	1.98024	2.643	0.00807515	0.0205381	4.28321	1.11609e-05	8.16675e-05	6.2463	0.0205381	19.4704	8.16675e-05	0.25686
hypothetical protein, phage SPbeta	undefined	undefined	NP_389993.1	-	yonG	+	2229988	2230908	921	CDS	1.05811	1.63378	0.111922	0.188994	4.25679	4.75423e-07	5.24627e-06	3.10324	0.188994	19.1171	5.24627e-06	0.147029
hypothetical protein, phage SPbeta	undefined	undefined	NP_389913.1	-	yorO	-	2174352	2174549	198	CDS	0.689067	0.383185	0.738423	0.812955	4.22503	9.20101e-08	1.27602e-06	1.30422	0.812955	18.7008	1.27602e-06	0.157321
hypothetical protein, phage SPbeta	undefined	undefined	NP_389914.1	-	yorN	-	2174585	2174734	150	CDS	0.594013	1.30068	0.202853	0.301052	4.1995	5.74489e-08	8.33314e-07	2.46345	0.301052	18.3728	8.33314e-07	0.147029
hypothetical protein, phage SPbeta	undefined	undefined	NP_389923.1	-	yorE	-	2186440	2186811	372	CDS	2.19666	0.534797	0.448972	0.562414	4.18994	6.11255e-13	3.17621e-11	1.44874	0.562414	18.2515	3.17621e-11	0.6087
	undefined	undefined	YP_003097700.1	yes	yhzF	+	1074381	1074572	192	CDS	0.722481	-1.01014	0.390008	0.50538	4.16966	2.25898e-09	4.59065e-08	-2.0141	0.50538	17.9967	4.59065e-08	0.236275
DNA (cytosine-5-)-methyltransferase, phage SPbeta	COG0270	Replication, recombination and repair	NP_389907.1	-	mtbP	-	2171401	2172732	1332	CDS	1.50632	1.32018	0.13589	0.222081	4.14033	9.79084e-08	1.33971e-06	2.49698	0.222081	17.6345	1.33971e-06	0.294057
conserved hypothetical protein, phage SPbeta	undefined	undefined	NP_389866.1	-	yotK	-	2153171	2153356	186	CDS	-0.0570363	0.353828	0.803311	0.860429	4.09457	1.2606e-05	9.11047e-05	1.27795	0.860429	17.084	9.11047e-05	0.0683681
N-acetylmuramoyl-L-alanine amidase, bacteriophage PBSX protein	COG1388	Cell wall/membrane/envelope biogenesis	NP_389128.1	-	xlyB	+	1317535	1318488	954	CDS	4.77053	1.10369	0.00267994	0.00812494	4.08352	5.561e-28	5.99581e-25	2.14903	0.00812494	16.9536	5.99581e-25	4.84784
intein of phage SPbeta ribonucleotide reductase	COG0209	Nucleotide transport and metabolism	NP_389888.2	-	nrdEB	-	2162108	2165614	3507	CDS	3.14024	1.60134	0.030535	0.0644785	4.0319	9.58927e-08	1.32094e-06	3.03425	0.0644785	16.3577	1.32094e-06	1.15845
putative DNA replication initiation protein, phage SPbeta	COG0358	Replication, recombination and repair	NP_389918.1	-	yorJ	-	2181256	2182392	1137	CDS	2.03733	1.08616	0.134932	0.220939	4.01563	4.7278e-10	1.16213e-08	2.12308	0.220939	16.1742	1.16213e-08	0.634139
conserved hypothetical protein, putative PBSX prophage protein	undefined	undefined	NP_389142.2	-	xkdF	+	1328702	1329529	828	CDS	6.15664	2.18772	1.18954e-09	1.57011e-08	3.95561	2.20346e-25	1.29217e-22	4.55586	1.57011e-08	15.5151	1.29217e-22	11.9067
hypothetical protein, phage SPbeta	COG3331	General function prediction only	NP_389864.1	-	yotM	-	2152265	2152852	588	CDS	0.435039	0.367626	0.745994	0.816832	3.94656	5.39745e-07	5.84605e-06	1.29023	0.816832	15.4182	5.84605e-06	0.167907
conserved hypothetical protein, phage SPbeta	undefined	undefined	NP_389868.1	-	yotI	-	2153718	2154080	363	CDS	0.0814451	0.845207	0.535451	0.641011	3.91755	0.00011042	0.000585626	1.79652	0.641011	15.1112	0.000585626	0.0786606
conserved hypothetical protein, phage SPbeta	COG4502	Nucleotide transport and metabolism	NP_389909.1	-	yorS	-	2172932	2173450	519	CDS	0.192761	-0.470693	0.706326	0.789186	3.8719	4.19857e-07	4.65815e-06	-1.38577	0.789186	14.6405	4.65815e-06	0.136736
conserved hypothetical protein, phage SPbeta	undefined	undefined	NP_389987.1	-	yonO	+	2222574	2225093	2520	CDS	2.93546	0.755625	0.158857	0.249277	3.82855	1.09783e-14	7.38788e-13	1.68836	0.249277	14.2072	7.38788e-13	1.44853
putative capsid protein, phage SPbeta	undefined	undefined	NP_389992.1	-	yonH	+	2229385	2229885	501	CDS	2.12704	2.93939	0.00220327	0.00688313	3.79016	6.05099e-05	0.000354341	7.67087	0.00688313	13.8341	0.000354341	0.215397
conserved hypothetical protein	undefined	undefined	NP_389134.2	-	xkdB	+	1322014	1322850	837	CDS	1.16638	2.81918	0.000112272	0.000509258	3.78214	2.26527e-08	3.60424e-07	7.05763	0.000509258	13.7574	3.60424e-07	0.235982
hypothetical protein, phage SPbeta	undefined	undefined	NP_389956.1	-	yopW	-	2202381	2202716	336	CDS	0.902633	0.0273631	0.977062	0.985774	3.74453	9.76098e-09	1.71234e-07	1.01915	0.985774	13.4035	1.71234e-07	0.304644
conserved hypothetical protein, phage SPbeta	undefined	undefined	NP_389879.1	yes	yosW	-	2157341	2157682	342	CDS	0.0995694	1.96034	0.103684	0.17668	3.727	0.000252575	0.00120983	3.89153	0.17668	13.2415	0.00120983	0.0683681
conserved hypothetical protein, phage SPbeta	undefined	undefined	NP_389933.1	-	yoqU	-	2193248	2193661	414	CDS	0.85916	1.37561	0.118455	0.197506	3.71621	1.93205e-07	2.36043e-06	2.59478	0.197506	13.1429	2.36043e-06	0.215397
phosphotransferase system (PTS) fructose-specific enzyme IIA component	COG2893	Carbohydrate transport and metabolism	NP_390585.1	-	levD	-	2762395	2762835	441	CDS	2.28919	0.366295	0.610151	0.707134	3.66459	5.24136e-08	7.7395e-07	1.28904	0.707134	12.681	7.7395e-07	0.965687
hypothetical protein, phage SPbeta	undefined	undefined	NP_389872.1	-	yotE	-	2154705	2154851	147	CDS	0.903305	0.55218	0.522906	0.629922	3.61254	3.30953e-08	5.03172e-07	1.4663	0.629922	12.2316	5.03172e-07	0.294057
PBSX defective prophage terminase (large subunit)	COG1783	Mobilome: prophages, transposons	NP_389140.1	-	xtmB	+	1325890	1327191	1302	CDS	5.4274	3.05699	6.66852e-13	1.53788e-11	3.60737	7.68366e-17	7.88536e-15	8.32237	1.53788e-11	12.1878	7.88536e-15	6.34901
putative capsid protein of PBSX prophage	undefined	undefined	NP_389143.1	-	xkdG	+	1329555	1330490	936	CDS	5.61482	1.986	3.75048e-09	4.48855e-08	3.59715	8.98126e-25	4.09645e-22	3.96136	4.48855e-08	12.1018	4.09645e-22	9.85933
dipeptide ABC transporter (ATP-binding protein)	COG0444	Amino acid transport and metabolism|Inorganic ion transport and metabolism	NP_389178.1	Yes	dppD	+	1363141	1364148	1008	CDS	1.80189	0.582344	0.356381	0.471693	3.59429	1.22363e-12	6.05178e-11	1.49728	0.471693	12.0779	6.05178e-11	0.718825
conserved hypothetical protein, putative PBSX prophage protein	undefined	undefined	NP_389144.1	-	xkdH	+	1330892	1331248	357	CDS	3.14293	2.39341	1.87518e-07	1.65185e-06	3.59112	1.70444e-15	1.32014e-13	5.25399	1.65185e-06	12.0513	1.32014e-13	1.5369
putative prophage terminase, ATP subunit, phage SPbeta	undefined	undefined	NP_389994.1	yes	yonF	+	2230895	2232664	1770	CDS	2.22446	1.93694	0.0213692	0.0478562	3.58553	1.39725e-05	9.87211e-05	3.82893	0.0478562	12.0047	9.87211e-05	0.513721
hypothetical protein, phage SPbeta	undefined	undefined	NP_389937.1	-	yoqP	-	2194718	2195059	342	CDS	0.426439	1.50535	0.176886	0.270033	3.57541	0.00030369	0.001428	2.83893	0.270033	11.9208	0.001428	0.136736
hypothetical protein	undefined	undefined	YP_054587.1	-	antE	+	2602979	2603275	297	CDS	0.242705	1.44523	0.154274	0.243293	3.56656	2.16298e-05	0.000144374	2.72305	0.243293	11.8479	0.000144374	0.147029
conserved hypothetical protein	undefined	undefined	NP_390251.1	-	yqjX	-	2464227	2464565	339	CDS	-0.17564	0.82854	0.534883	0.640518	3.5305	0.000407611	0.00184278	1.77589	0.640518	11.5554	0.00184278	0.0995393
hypothetical protein	undefined	undefined	NP_389087.2	-	yjdH	-	1277062	1277457	396	CDS	3.44161	-2.64581	2.70085e-05	0.000144362	3.49888	2.80636e-12	1.29043e-10	-6.25848	0.000144362	11.3049	1.29043e-10	3.16965
bacteriophage SPbeta N-acetylmuramoyl-L-alanine amidase	COG5632	Cell wall/membrane/envelope biogenesis	NP_390024.1	-	blyA	+	2263489	2264592	1104	CDS	1.49139	1.22206	0.199063	0.296714	3.49542	7.36289e-05	0.000417468	2.33279	0.296714	11.2779	0.000417468	0.366986
conserved hypothetical protein	undefined	undefined	YP_003097713.1	-	ykzL	+	1330512	1330895	384	CDS	4.0238	1.90076	1.56209e-06	1.09427e-05	3.48901	1.48436e-18	2.12414e-16	3.73409	1.09427e-05	11.2278	2.12414e-16	3.39931
conserved hypothetical protein, phage SPbeta	undefined	undefined	NP_389990.2	-	yonJ	+	2227505	2228722	1218	CDS	3.37952	2.12995	0.00122477	0.00416544	3.48889	1.18581e-07	1.57533e-06	4.37703	0.00416544	11.2269	1.57533e-06	0.971712
conserved hypothetical protein, phage SPbeta	undefined	undefined	YP_003097752.1	yes	youB	-	2247367	2247543	177	CDS	2.517	3.81863	2.28108e-13	5.58683e-12	3.46634	1.25682e-10	3.5581e-09	14.1098	5.58683e-12	11.0528	3.5581e-09	0.550918
Na+/malate symporter	COG3493	Energy production and conversion		yes	maeN	+	3244770	3246116	1347	CDS	6.99129	1.58075	0.012018	0.0290199	3.45635	2.98057e-07	3.47592e-06	2.99125	0.0290199	10.9766	3.47592e-06	27.8192
putative phage capsid protein	COG5518	Mobilome: prophages, transposons	NP_389141.2	-	xkdE	+	1327195	1328682	1488	CDS	5.48993	2.82915	7.90158e-12	1.52282e-10	3.41249	5.35595e-16	4.67791e-14	7.10656	1.52282e-10	10.6478	4.67791e-14	7.75005
putative acetyltransferase	COG0454	Transcription|General function prediction only	NP_389393.2	-	ylbP	-	1576767	1577249	483	CDS	4.62369	1.17398	0.00206872	0.00652235	3.40476	2.03588e-18	2.6959e-16	2.25633	0.00652235	10.591	2.6959e-16	5.68768
putative metallo-dependent hydrolase, phage SPbeta	COG1409	Signal transduction mechanisms	NP_389875.1	-	yotB	-	2155293	2156120	828	CDS	2.95037	-0.187855	0.730569	0.807481	3.40111	5.30504e-12	2.17951e-10	-1.13907	0.807481	10.5642	2.17951e-10	1.98284
putative single-strand DNA-specific exonuclease, phage SPbeta	COG0608	Replication, recombination and repair	NP_389917.1	-	yorK	-	2179526	2181256	1731	CDS	2.07329	-0.119637	0.869553	0.911521	3.39687	8.51848e-08	1.19346e-06	-1.08646	0.911521	10.5332	1.19346e-06	0.907611
putative acetyltransferase	COG1670	Translation, ribosomal structure and biogenesis|Posttranslational modification, protein turnover, chaperones	NP_389086.1	-	yjdG	-	1276337	1276843	507	CDS	3.60507	2.17623	0.000104449	0.000475347	3.38669	3.26335e-09	6.37907e-08	4.5197	0.000475347	10.4591	6.37907e-08	2.28292
conserved hypothetical protein, phage protein	undefined	undefined	YP_003097712.1	-	ykzK	+	1323550	1323717	168	CDS	0.693776	3.36741	9.64411e-05	0.000442831	3.35002	0.000135	0.000697076	10.3202	0.000442831	10.1966	0.000697076	0.1782
fatty acid desaturase	COG3239	Lipid transport and metabolism	NP_389799.1	yes	des	+	2089396	2090454	1059	CDS	6.29911	2.71173	3.46521e-05	0.000180287	3.34617	6.37352e-07	6.70853e-06	6.55107	0.000180287	10.1695	6.70853e-06	11.3823
putative replicative DNA helicase, phage SPbeta	COG0305	Replication, recombination and repair	NP_389919.1	-	yorI	-	2182408	2183922	1515	CDS	2.12178	0.257976	0.7153	0.795962	3.34451	2.28548e-07	2.75129e-06	1.1958	0.795962	10.1578	2.75129e-06	0.944808
SPbeta phage deoxyuridine 5'-triphosphate nucleotidohydrolase	COG0756	Nucleotide transport and metabolism|Defense mechanisms	NP_389883.1	-	yosS	-	2159268	2159696	429	CDS	1.52227	1.03574	0.195633	0.293092	3.33041	4.63838e-06	3.79294e-05	2.05016	0.293092	10.059	3.79294e-05	0.503428
hypothetical protein, phage SPbeta	undefined	undefined	NP_389870.1	-	yotG	-	2154266	2154583	318	CDS	0.0167629	0.391082	0.730007	0.807364	3.33013	4.72632e-05	0.000285317	1.31138	0.807364	10.057	0.000285317	0.147029
putative hydrolase	COG2267	Lipid transport and metabolism			yugF	+	3227581	3228402	822	CDS	2.91186	-0.552398	0.28497	0.394425	3.30424	2.33212e-13	1.32963e-11	-1.46652	0.394425	9.87814	1.32963e-11	2.34953
conserved hypothetical protein, phage SPbeta	undefined	undefined	NP_390023.1	-	yomD	+	2262437	2263261	825	CDS	0.513493	2.67931	0.0391596	0.0786834	3.23958	0.0109803	0.0296151	6.4055	0.0786834	9.44517	0.0296151	0.0995393
putative lipoprotein	undefined	undefined	NP_389363.1	-	ylaJ	-	1548681	1549310	630	CDS	1.76905	2.01885	0.000312378	0.00124982	3.23051	4.81372e-10	1.17621e-08	4.05261	0.00124982	9.38598	1.17621e-08	0.661043
guanine riboswitch	undefined	undefined			gswB	+	4005523	4005625	103	No_CDS	3.64041	3.14159	2.0734e-10	3.16406e-09	3.22891	8.4844e-11	2.48775e-09	8.82496	3.16406e-09	9.37561	2.48775e-09	1.85551
biotin transporter	COG1268	Coenzyme transport and metabolism	NP_388918.1	yes	bioY	-	1111925	1112485	561	CDS	1.31751	1.37888	0.0249967	0.0548139	3.22333	1.09101e-09	2.42086e-08	2.60066	0.0548139	9.33943	2.42086e-08	0.592675
conserved hypothetical protein, phage SPbeta	undefined	undefined	NP_389968.1	-	yopK	-	2208994	2210154	1161	CDS	5.55534	-0.46011	0.165165	0.256693	3.21444	1.48407e-21	3.91981e-19	-1.37565	0.256693	9.28205	3.91981e-19	14.9758
bacteriophage SPbeta DNA ligase	COG1793	Replication, recombination and repair	NP_389932.1	-	ligB	+	2192370	2193182	813	CDS	1.70497	1.91406	0.00256189	0.0078132	3.21363	1.31644e-07	1.72629e-06	3.76868	0.0078132	9.27682	1.72629e-06	0.708533
conserved hypothetical protein, phage SPbeta	undefined	undefined	NP_389995.1	-	yonE	+	2232682	2234202	1521	CDS	2.58652	2.01373	0.00397972	0.011345	3.21354	3.42598e-06	2.89972e-05	4.03824	0.011345	9.27622	2.89972e-05	0.766315
conserved hypothetical protein, putative PBSX prophage	undefined	undefined	NP_389146.1	-	xkdJ	+	1331743	1332183	441	CDS	3.80746	1.78531	6.80939e-06	4.1596e-05	3.18966	8.88378e-16	7.44243e-14	3.44693	4.1596e-05	9.12395	7.44243e-14	3.34358
hypothetical protein, phage SPbeta	undefined	undefined	NP_389873.1	-	yotD	-	2154887	2155018	132	CDS	0.0468786	0.019408	0.987352	0.991701	3.1879	0.000163508	0.000826604	1.01354	0.991701	9.11285	0.000826604	0.147029
conserved hypothetical protein, phage SPbeta	undefined	undefined	NP_389997.1	-	yonC	+	2235694	2236230	537	CDS	2.26965	0.907457	0.191786	0.288065	3.14694	1.81371e-06	1.70642e-05	1.87574	0.288065	8.85776	1.70642e-05	0.917904
stage III sporulation protein	undefined	undefined	NP_390320.1	yes	spoIIIAD	-	2535544	2535945	402	CDS	0.437209	3.18775	0.00648539	0.0170761	3.13896	0.00829697	0.0235215	9.1119	0.0170761	8.80887	0.0235215	0.0995393
decarboxylase converting malonyl-S-AcpK to acetyl-S-AcpK for polyketide synthesis	COG0304	Lipid transport and metabolism|Secondary metabolites biosynthesis, transport and catabolism	NP_389594.2	-	pksF	+	1788695	1789942	1248	CDS	1.48878	-0.0475117	0.946555	0.965609	3.08986	5.33961e-08	7.82824e-07	-1.03348	0.965609	8.51413	7.82824e-07	0.708533
hypothetical protein, phage SPbeta	undefined	undefined	NP_389951.1	-	yoqB	-	2200790	2201128	339	CDS	0.607872	0.409663	0.668676	0.756412	3.08757	0.000122744	0.000643505	1.32838	0.756412	8.50062	0.000643505	0.30435
conserved hypothetical protein from phage origin	undefined	undefined	YP_003097714.1	-	ykzM	+	1332187	1332405	219	CDS	3.20322	1.51501	0.000936453	0.00329969	3.08515	9.0895e-12	3.48714e-10	2.85801	0.00329969	8.48637	3.48714e-10	2.51744
potassium/proton-divalent cation antiporter	COG1230	Inorganic ion transport and metabolism	NP_390542.1	yes	czcD	-	2723892	2724827	936	CDS	3.83426	0.0306994	0.949024	0.966682	3.07728	1.40761e-10	3.93077e-09	1.02151	0.966682	8.44021	3.93077e-09	4.72801
putative biotin transporter	COG1268	Coenzyme transport and metabolism			bioYB	+	3294270	3294872	603	CDS	7.13316	0.718983	0.0330062	0.0686027	3.05775	1.47625e-17	1.63783e-15	1.64602	0.0686027	8.32674	1.63783e-15	40.5295
phosphotransferase system (PTS) lichenan-specific enzyme IIC component	COG1455	Carbohydrate transport and metabolism	NP_391737.1	yes	licC	-	3960192	3961550	1359	CDS	5.65768	-0.771552	0.129114	0.213028	3.05429	8.64932e-09	1.54372e-07	-1.70711	0.213028	8.3068	1.54372e-07	14.8164
enzyme involved in polyketide synthesis	COG0331	Lipid transport and metabolism	NP_389593.3	-	pksE	+	1786104	1788407	2304	CDS	3.42987	1.01697	0.0315699	0.066221	3.03388	1.06646e-10	3.08297e-09	2.02367	0.066221	8.19011	3.08297e-09	2.89618
conserved hypothetical protein in phage element PBSX	undefined	undefined	NP_389147.2	-	xkdK	+	1332402	1333802	1401	CDS	5.83183	1.56554	2.64639e-06	1.77218e-05	3.0318	1.7364e-18	2.37598e-16	2.95987	1.77218e-05	8.1783	2.37598e-16	16.0796
enzyme involved in polyketide synthesis	COG3321	Secondary metabolites biosynthesis, transport and catabolism	NP_389592.2	-	pksD	+	1785133	1786107	975	CDS	2.72091	0.933291	0.0770936	0.138499	3.02304	3.78652e-09	7.29749e-08	1.90963	0.138499	8.12879	7.29749e-08	1.84213
conserved hypothetical protein, putative general secretion pathway protein, phage SPbeta	COG2135	Posttranslational modification, protein turnover, chaperones	NP_389931.1	-	yoqW	+	2191626	2192300	675	CDS	4.39103	2.71546	3.29638e-12	6.79983e-11	3.02265	1.34705e-14	8.77718e-13	6.56801	6.79983e-11	8.12658	8.77718e-13	4.2709
conserved hypothetical protein, phage protein	undefined	undefined	NP_389136.1	-	xkdD	+	1323802	1324152	351	CDS	1.75649	2.85279	3.01619e-07	2.5424e-06	3.02047	6.76914e-08	9.71585e-07	7.22394	2.5424e-06	8.11433	9.71585e-07	0.571797
small acid-soluble spore protein	undefined	undefined	YP_054579.2	-	sspN	+	1930264	1930410	147	CDS	0.134973	3.53256	0.000840608	0.00300583	2.94732	0.00935211	0.0259921	11.5719	0.00300583	7.71316	0.0259921	0.0786606
putative RNA polymerase PBSX sigma factor-like	COG1595	Transcription	NP_389138.1	-	xpf	+	1324471	1324980	510	CDS	1.24821	3.23263	8.87564e-07	6.67299e-06	2.93874	1.79889e-05	0.000123486	9.39978	6.67299e-06	7.66742	0.000123486	0.335815
phosphotransferase system (PTS) fructose-specific enzyme IIB component	COG3444	Carbohydrate transport and metabolism	NP_390584.1	-	levE	-	2761907	2762395	489	CDS	2.96172	0.697099	0.269027	0.377188	2.92438	4.17587e-06	3.47707e-05	1.62124	0.377188	7.59149	3.47707e-05	2.13618
alanine racemase	COG0787	Cell wall/membrane/envelope biogenesis	NP_389646.1	-	alrB	-	1897941	1899125	1185	CDS	1.13516	0.933698	0.141388	0.228413	2.91076	9.73342e-08	1.33631e-06	1.91017	0.228413	7.52012	1.33631e-06	0.577822
conserved hypothetical protein, phage SPbeta	COG3584	Function unknown	NP_389915.1	1	yorM	-	2174852	2175568	717	CDS	0.907007	0.823395	0.254434	0.361173	2.90089	1.82892e-06	1.70642e-05	1.76957	0.361173	7.46885	1.70642e-05	0.441086
tryptophan synthase (beta subunit)	COG0133	Amino acid transport and metabolism	NP_390145.2	-	trpB	-	2372304	2373506	1203	CDS	7.83605	7.0285	5.4801e-37	5.62396e-34	2.85913	2.01815e-09	4.2268e-08	130.554	5.62396e-34	7.25576	4.2268e-08	4.52467
conserved hypothetical protein in PBSX phage element	COG1484	Replication, recombination and repair	NP_389135.2	-	xkdC	+	1322750	1323550	801	CDS	1.99013	2.20431	1.1468e-05	6.52927e-05	2.81964	9.29545e-09	1.64473e-07	4.60853	6.52927e-05	7.05987	1.64473e-07	0.87644
ribonucleoside-diphosphate reductase 2, beta subunit	COG0208	Nucleotide transport and metabolism	NP_389886.2	1	yosP	-	2159981	2161778	1798	CDS	1.10907	2.18928	0.0173075	0.039847	2.81381	0.00188219	0.0068082	4.56078	0.039847	7.03137	0.0068082	0.294057
phosphotransferase system (PTS) lichenan-specific enzyme IIA component	COG1447	Carbohydrate transport and metabolism	NP_391736.1	-	licA	-	3959841	3960173	333	CDS	3.94317	-0.136025	0.809126	0.864551	2.81279	6.97106e-07	7.28147e-06	-1.09887	0.864551	7.0264	7.28147e-06	4.24488
conserved hypothetical protein, phage SPbeta	COG4474	Mobilome: prophages, transposons	NP_389943.1	-	yoqJ	-	2197344	2197859	516	CDS	0.953295	1.36232	0.100517	0.17207	2.7975	0.000387049	0.00175562	2.57099	0.17207	6.95233	0.00175562	0.430793
thiamine pyrophosphate riboswitch	undefined	undefined			tswD	+	955655	955762	108	No_CDS	6.02046	3.14823	3.57102e-14	1.02511e-12	2.78037	1.38966e-11	4.91772e-10	8.86566	1.02511e-12	6.87027	4.91772e-10	11.3899
conserved hypothetical protein, phage SPbeta	COG4195	Mobilome: prophages, transposons	NP_389928.1	-	yoqZ	-	2189961	2190785	825	CDS	2.52249	0.582244	0.331688	0.444235	2.77654	1.66571e-06	1.59018e-05	1.49718	0.444235	6.85208	1.59018e-05	1.53895
putative exporter	COG2814	Carbohydrate transport and metabolism			yuxJ	+	3232640	3233818	1179	CDS	5.48524	-0.292566	0.412198	0.528112	2.74316	5.25833e-14	3.22171e-12	-1.22482	0.528112	6.69533	3.22171e-12	16.7372
hypothetical protein, phage SPbeta	undefined	undefined	NP_390014.1	-	yozP	-	2246151	2246480	330	CDS	0.545534	-1.4373	0.136848	0.222876	2.74301	1.63813e-05	0.000113975	-2.70813	0.222876	6.69464	0.000113975	0.482843
conserved hypothetical protein, phage SPbeta	undefined	undefined	NP_389999.1	-	yonA	+	2237321	2237791	471	CDS	2.06071	0.694794	0.344032	0.458226	2.72603	7.79524e-05	0.000437749	1.61865	0.458226	6.61631	0.000437749	0.756022
conserved hypothetical protein	undefined	undefined	NP_389097.1	1	yjgB	-	1284870	1285445	576	CDS	3.08363	1.77741	0.000584943	0.0021829	2.72292	1.50054e-07	1.92492e-06	3.42811	0.0021829	6.60208	1.92492e-06	2.20882
conserved hypothetical protein	undefined	undefined	NP_387889.1	-	yaaC	-	14847	15794	948	CDS	1.39048	1.46162	0.0336806	0.0698277	2.71939	3.16352e-05	0.000202564	2.75418	0.0698277	6.58595	0.000202564	0.640165
protein required for proper spore morphogenesis and germination	undefined	undefined	NP_391692.1	yes	ywcE	+	3914009	3914272	264	CDS	3.873	-0.801606	0.178964	0.272496	2.71038	6.63465e-06	5.22749e-05	-1.74304	0.272496	6.54493	5.22749e-05	6.46767
acyl-carrier protein	COG0236	Lipid transport and metabolism|Secondary metabolites biosynthesis, transport and catabolism	NP_570904.1	-	acpK	+	1788469	1788717	249	CDS	-0.251146	0.656277	0.548129	0.652762	2.70927	0.00231391	0.00815329	1.57601	0.652762	6.53992	0.00815329	0.199079
inorganic polyphosphate/ATP-NAD kinase	COG0061	Nucleotide transport and metabolism	NP_390832.1	-	ppnKB	+	3021233	3022036	804	CDS	8.06137	3.73668	3.39449e-28	7.33389e-26	2.70156	1.13549e-16	1.084e-14	13.3307	7.33389e-26	6.50504	1.084e-14	40.2766
acetyl-CoA synthetase	COG0365	Lipid transport and metabolism		yes	acsA	-	3038213	3039931	1719	CDS	7.01002	1.99543	1.98639e-10	3.05399e-09	2.69766	4.08802e-17	4.41614e-15	3.98736	3.05399e-09	6.48749	4.41614e-15	31.9509
glycine riboswitch	undefined	undefined			swgA	-	2549407	2549606	200	No_CDS	2.94178	2.36123	1.52376e-08	1.66357e-07	2.67746	1.52824e-10	4.1404e-09	5.13807	1.66357e-07	6.39727	4.1404e-09	1.81096
tRNA-Gly	undefined	undefined			trnB-Gly2	-	3172247	3172320	74	tRNA	2.03472	-1.01607	0.135899	0.222081	2.66082	9.06815e-06	6.78046e-05	-2.0224	0.222081	6.32394	6.78046e-05	1.75112
conserved hypothetical protein	undefined	undefined	NP_389263.1	-	ykvR	+	1447251	1447541	291	CDS	3.0342	1.82396	4.61419e-06	2.92304e-05	2.65574	1.28665e-11	4.63305e-10	3.54051	2.92304e-05	6.30171	4.63305e-10	2.43936
hypothetical protein, phage SPbeta	undefined	undefined	NP_389947.1	-	yoqF	-	2199150	2199353	204	CDS	0.449329	0.0942428	0.909143	0.938143	2.64839	3.48859e-05	0.000219642	1.0675	0.938143	6.26969	0.000219642	0.403889
conserved hypothetical protein, phage SPbeta	undefined	undefined	NP_390019.1	-	yomH	+	2256062	2256820	759	CDS	0.640815	0.72065	0.48137	0.592334	2.64722	0.00637856	0.0188781	1.64792	0.592334	6.26459	0.0188781	0.34184
hypothetical protein, phage SPbeta	undefined	undefined	NP_389934.1	1	yoqT	+	2193827	2193976	150	CDS	0.484775	4.42557	1.64724e-07	1.46998e-06	2.63399	0.0165096	0.0413749	21.4897	1.46998e-06	6.20742	0.0413749	0.0683681
conserved hypothetical protein, putative PBSX prophage protein	undefined	undefined	NP_389145.1	-	xkdI	+	1331245	1331730	486	CDS	3.80237	1.3553	0.000344873	0.00136519	2.62304	3.8299e-12	1.63768e-10	2.5585	0.00136519	6.16046	1.63768e-10	4.70508
copper(I)-transporting ATPase	COG2217	Inorganic ion transport and metabolism	NP_391229.2	yes	copB	-	3438853	3440961	2109	CDS	7.95229	1.32411	0.00264707	0.00803359	2.6184	1.16711e-08	1.9716e-07	2.50378	0.00803359	6.1407	1.9716e-07	77.7633
conserved hypothetical protein	undefined	undefined			BSU18596	+	2028854	2028976	123	CDS	0.192271	0.00215401	0.997408	0.998625	2.60274	0.000188228	0.000939994	1.00149	0.998625	6.0744	0.000939994	0.325229
tRNA-Arg	undefined	undefined			trnI-Arg	+	166064	166140	77	tRNA	0.230616	-0.818115	0.383791	0.499421	2.60184	6.93264e-05	0.000395257	-1.7631	0.499421	6.0706	0.000395257	0.383304
conserved hypothetical protein	undefined	undefined		-	yuaE	+	3182707	3183195	489	CDS	6.80189	1.56124	2.46022e-07	2.1084e-06	2.59412	7.95224e-17	7.96194e-15	2.95106	2.1084e-06	6.03819	7.96194e-15	33.2528
phosphotransferase system (PTS) lichenan-specific enzyme IIB component	COG1440	Carbohydrate transport and metabolism	NP_391738.1	-	licB	-	3961566	3961874	309	CDS	3.94246	-1.05882	0.0236917	0.0525131	2.5868	7.15086e-09	1.31634e-07	-2.08323	0.0525131	6.00764	1.31634e-07	6.36533
conserved hypothetical protein	undefined	undefined	NP_390078.1	-	ypzA	+	2308495	2308764	270	CDS	3.16669	-1.44429	0.00251965	0.00770153	2.58537	5.38669e-10	1.2856e-08	-2.72128	0.00770153	6.00167	1.2856e-08	4.33927
hypothetical protein, phage SPbeta	undefined	undefined	NP_389936.1	-	yoqR	-	2194402	2194758	357	CDS	0.0190032	-0.949328	0.447617	0.56123	2.57238	0.00748258	0.0215702	-1.93097	0.56123	5.94791	0.0215702	0.215397
6-phospho-beta-glucosidase	COG1486	Carbohydrate transport and metabolism	NP_391735.1	-	licH	-	3958516	3959844	1329	CDS	6.16931	-0.0390108	0.933172	0.955193	2.55808	1.35405e-07	1.75898e-06	-1.02741	0.955193	5.88922	1.75898e-06	20.8303
putative phage-related lytic exoenzyme, phage SPbeta	undefined	undefined	NP_390007.1	-	yomS	+	2242056	2242412	357	CDS	0.342539	1.67377	0.0699883	0.12769	2.55325	0.00357142	0.0117098	3.19047	0.12769	5.86955	0.0117098	0.225689
acetyl-S-AcpK beta-ketothioester polyketide intermediate transferase	COG3425	Lipid transport and metabolism	NP_389595.2	-	pksG	+	1789943	1791205	1263	CDS	1.15878	0.498091	0.450123	0.563236	2.55038	4.41168e-06	3.64385e-05	1.41234	0.563236	5.85789	3.64385e-05	0.629872
putative stress response protein	COG3861	Function unknown	NP_390712.3	-	ysnF	+	2898931	2899752	822	CDS	5.28818	2.47812	1.15221e-05	6.55098e-05	2.543	7.20576e-06	5.56008e-05	5.57173	6.55098e-05	5.82799	5.56008e-05	9.64908
conserved hypothetical protein, phage SPbeta	undefined	undefined	NP_389880.1	-	yosV	-	2157829	2158119	291	CDS	0.596395	1.82128	0.0187804	0.0428662	2.52951	0.000654107	0.00273155	3.53394	0.0428662	5.77376	0.00273155	0.314936
conserved hypothetical protein, putative PBSX prophage protein	undefined	undefined	YP_003097715.1	-	xkzB	+	1334815	1334964	150	CDS	0.711625	2.08957	0.0064935	0.0170761	2.52792	0.000787006	0.00320395	4.25622	0.0170761	5.76739	0.00320395	0.325229
nitrogen sensing transcriptional regulator	COG0789	Transcription	NP_389214.1	-	tnrA	-	1397411	1397743	333	CDS	4.12915	0.25244	0.528404	0.634141	2.5254	3.07715e-10	7.79734e-09	1.19122	0.634141	5.75732	7.79734e-09	7.06018
K+/H+ antiporter for K+ efflux	undefined	undefined	NP_388868.1	1	khtS	-	1060988	1061326	339	CDS	6.27174	0.630341	0.0323492	0.0674764	2.51725	1.45126e-16	1.35396e-14	1.54793	0.0674764	5.72491	1.35396e-14	31.1025
putative monooxygenase	COG2141	Coenzyme transport and metabolism|General function prediction only	NP_391831.1	-	yxeK	-	4060818	4062143	1326	CDS	3.07527	-1.21948	0.0545251	0.104048	2.51302	4.00892e-05	0.000247096	-2.32862	0.104048	5.70813	0.000247096	4.35441
heat stress induced protein	undefined	undefined	NP_388636.1	-	yflT	+	827455	827802	348	CDS	8.47675	1.60763	0.00391122	0.0111808	2.49984	1.34333e-05	9.57831e-05	3.04751	0.0111808	5.65622	9.57831e-05	97.3272
conserved hypothetical protein	undefined	undefined	NP_390597.1	-	yrzI	-	2778923	2779072	150	CDS	4.48939	-0.687193	0.0911519	0.158685	2.48978	7.64842e-10	1.74427e-08	-1.61015	0.158685	5.61693	1.74427e-08	10.9875
hypothetical protein, phage SPbeta	undefined	undefined	NP_390012.1	-	yomN	+	2244714	2245133	420	CDS	1.30379	0.600461	0.426663	0.542077	2.48769	0.000307477	0.00144361	1.5162	0.542077	5.60881	0.00144361	0.640165
putative riboswitch	undefined	undefined			ydaO (swaO)	+	486092	486235	144	No_CDS	8.15466	2.62224	4.21468e-12	8.52278e-11	2.46414	5.86362e-11	1.79628e-09	6.15705	8.52278e-11	5.51798	1.79628e-09	57.7482
putative integral inner membrane protein involved in subtilosin production and immunity	undefined	undefined	NP_391623.1	yes	albG	+	3842294	3842995	702	CDS	1.99269	-0.122573	0.821431	0.875155	2.46256	3.24764e-07	3.73433e-06	-1.08867	0.875155	5.51195	3.73433e-06	1.67451
dehydratase for polyketide biosynthesis	COG1024	Lipid transport and metabolism	NP_389596.1	1	pksH	+	1791193	1791972	780	CDS	0.8246	0.717278	0.307153	0.418298	2.43339	4.1364e-05	0.000254191	1.64408	0.418298	5.40163	0.000254191	0.493136
2,3-dihydro-2,3-dihydroxybenzoate dehydrogenase	COG1028	Lipid transport and metabolism|Secondary metabolites biosynthesis, transport and catabolism|General function prediction only			dhbA	-	3291511	3292296	786	CDS	9.87757	0.626543	0.0668457	0.12294	2.42902	1.22727e-11	4.45837e-10	1.54386	0.12294	5.38527	4.45837e-10	290.667
degradative acetoacetyl-CoA thiolase	COG0183	Lipid transport and metabolism	NP_390297.1	-	mmgA	-	2512861	2514042	1182	CDS	0.213223	1.34325	0.132094	0.216986	2.42724	0.00299656	0.0101576	2.53722	0.216986	5.37862	0.0101576	0.225689
conserved hypothetical protein	COG5584	Function unknown		1	ytzB	+	3056479	3056796	318	CDS	7.29787	1.62908	4.95698e-07	3.9743e-06	2.42111	2.99107e-13	1.63711e-11	3.09316	3.9743e-06	5.35585	1.63711e-11	47.808
conserved hypothetical protein	undefined	undefined	NP_388736.1	-	yfhJ	+	928389	928658	270	CDS	5.93445	0.675401	0.0166713	0.0385554	2.41859	6.15175e-17	6.47511e-15	1.59704	0.0385554	5.34649	6.47511e-15	24.302
purine nucleoside transporter	COG1972	Nucleotide transport and metabolism	NP_391781.2	yes	nupG	+	4005752	4006945	1194	CDS	10.2653	1.85918	1.60914e-07	1.44541e-06	2.40573	2.91166e-11	9.5619e-10	3.628	1.44541e-06	5.29902	9.5619e-10	327.736
sulfite reductase (flavoprotein alpha-subunit)	COG0369	Inorganic ion transport and metabolism	NP_391224.1	-	cysJ	-	3432339	3434156	1818	CDS	6.95043	0.28251	0.580728	0.681131	2.39982	7.52213e-06	5.75016e-05	1.21631	0.681131	5.27738	5.75016e-05	51.5269
putative phage integrase, phage SPbeta	COG0582	Replication, recombination and repair|Mobilome: prophages, transposons	NP_389963.1	-	yopP	-	2206682	2207758	1077	CDS	4.54668	-0.547087	0.146205	0.234079	2.39765	1.43031e-10	3.96718e-09	-1.46113	0.234079	5.26944	3.96718e-09	12.1005
putative efflux transporter	COG2814	Carbohydrate transport and metabolism			yttB	-	3107232	3108425	1194	CDS	7.32357	0.95126	0.000820227	0.00293807	2.39596	3.98856e-16	3.63845e-14	1.93356	0.00293807	5.26326	3.63845e-14	57.0047
conserved hypothetical protein, conserved in Bacilli	undefined	undefined	YP_054581.1	-	yozQ	+	2029020	2029313	294	CDS	1.65831	0.155813	0.771483	0.836929	2.3846	1.42683e-07	1.8397e-06	1.11405	0.836929	5.222	1.8397e-06	1.19138
conserved hypothetical protein, putative PBSX prophage	undefined	undefined	NP_389149.2	-	xkdN	+	1334339	1334785	447	CDS	3.60208	1.33147	0.00480734	0.0132711	2.38391	5.49432e-07	5.88882e-06	2.51659	0.0132711	5.21949	5.88882e-06	4.4591
membrane bound gamma-glutamyltranspeptidase	COG0405	Amino acid transport and metabolism	NP_389723.1	1	ggt	+	2004677	2006440	1764	CDS	1.09249	1.06547	0.088274	0.155122	2.38005	3.16799e-05	0.000202564	2.09285	0.155122	5.20556	0.000202564	0.681922
choline ABC transporter (permease)	COG1174	Amino acid transport and metabolism	NP_391252.1	yes	opuBB	-	3461435	3462088	654	CDS	2.26514	-1.44693	0.00576177	0.0154994	2.37916	1.16467e-08	1.9716e-07	-2.72628	0.0154994	5.20234	1.9716e-07	2.44656
isochorismate synthase	COG1169	Coenzyme transport and metabolism|Secondary metabolites biosynthesis, transport and catabolism			dhbC	-	3290289	3291485	1197	CDS	10.045	0.293859	0.369834	0.485504	2.371	5.3094e-12	2.17951e-10	1.22591	0.485504	5.173	2.17951e-10	345.651
conserved hypothetical protein, phage SPbeta	undefined	undefined	NP_390010.1	-	yomP	+	2243989	2244180	192	CDS	0.327795	1.49619	0.167146	0.258821	2.36027	0.0225576	0.0534328	2.82097	0.258821	5.13465	0.0534328	0.147029
putative integral inner membrane protein	undefined	undefined	NP_389666.1	yes	yndM	-	1916006	1916545	540	CDS	1.20417	3.03063	1.24097e-06	8.98444e-06	2.33118	0.000782572	0.00319013	8.17168	8.98444e-06	5.03217	0.00319013	0.314936
PBSX phage protein, homolog of YqaO of the skin element	undefined	undefined	NP_389137.1	-	xtrA	+	1324149	1324355	207	CDS	1.13119	1.97465	0.00414067	0.0117143	2.33036	0.000668199	0.00277908	3.93033	0.0117143	5.0293	0.00277908	0.530333
conserved hypothetical protein, phage SPbeta	undefined	undefined	NP_390009.1	-	yomQ	+	2243642	2243992	351	CDS	0.405231	1.77185	0.0479162	0.0933094	2.32932	0.00737735	0.0213118	3.41492	0.0933094	5.02567	0.0213118	0.236275
putative transporter	undefined	undefined	NP_390647.1	yes	yrzE	+	2831915	2832367	453	CDS	1.98697	1.835	0.000185531	0.000794995	2.32886	1.55808e-06	1.49787e-05	3.56771	0.000794995	5.02408	1.49787e-05	1.16477
conserved hypothetical protein, phage SPbeta	undefined	undefined	NP_389878.1	-	yosX	-	2156757	2157110	354	CDS	2.28624	0.175704	0.724662	0.802898	2.32706	1.17985e-07	1.57249e-06	1.12952	0.802898	5.01781	1.57249e-06	1.72024
conserved hypothetical protein, phage SPbeta	undefined	undefined	NP_389996.1	-	yonD	+	2234233	2235669	1437	CDS	3.70741	0.687402	0.161157	0.25191	2.31974	2.22888e-06	2.0226e-05	1.61038	0.25191	4.99241	2.0226e-05	4.04036
transcriptional regulator of heat-shock genes	COG1420	Transcription	NP_390427.1	-	hrcA	-	2628606	2629637	1032	CDS	9.06639	1.3699	8.58713e-06	5.10872e-05	2.30386	3.5152e-13	1.89867e-11	2.58452	5.10872e-05	4.93776	1.89867e-11	192.562
phosphotransferase system (PTS) fructose-specific enzyme IIC component	COG3715	Carbohydrate transport and metabolism	NP_390583.1	yes	levF	-	2761081	2761890	810	CDS	2.8808	0.824042	0.178802	0.272451	2.3025	0.000196989	0.0009778	1.77036	0.272451	4.93311	0.0009778	2.66622
conserved hypothetical protein	COG1853	Energy production and conversion	NP_391489.1	-	ywrF	+	3717999	3718616	618	CDS	5.5441	1.34768	3.51285e-05	0.000182535	2.28643	5.61816e-12	2.28112e-10	2.54503	0.000182535	4.87848	2.28112e-10	16.5747
RNA polymerase ECF(extracytoplasmic function)-type sigma factor sigma(X)	COG1595	Transcription	NP_390191.2	-	sigX	-	2414627	2415211	585	CDS	4.27021	0.962857	0.00615322	0.0163321	2.2841	9.32541e-11	2.71495e-09	1.94917	0.0163321	4.87059	2.71495e-09	7.31219
hypothetical protein, phage SPbeta	undefined	undefined	NP_390005.1	-	yomU	+	2240339	2241136	798	CDS	3.46309	0.711645	0.226677	0.328222	2.26489	0.000116346	0.000613246	1.63767	0.328222	4.80619	0.000613246	2.62873
6-phospho-alpha-glucosidase	COG1486	Carbohydrate transport and metabolism	NP_388699.1	1	malA	+	890022	891371	1350	CDS	5.8445	0.938766	0.0250401	0.0548797	2.26441	1.42963e-07	1.8397e-06	1.91689	0.0548797	4.80459	1.8397e-06	16.0021
pyrrolidone-carboxylate peptidase	COG2039	Posttranslational modification, protein turnover, chaperones	NP_388147.1	1	pcp	-	286773	287420	648	CDS	4.03154	0.566117	0.0874452	0.153929	2.26337	3.18887e-12	1.39259e-10	1.48053	0.153929	4.80113	1.39259e-10	6.70085
threonine 3-dehydrogenase	COG1063	Amino acid transport and metabolism|General function prediction only	NP_389581.1	-	tdh	+	1770461	1771504	1044	CDS	5.01026	0.829876	0.030137	0.0638021	2.25166	8.43923e-09	1.51943e-07	1.77753	0.0638021	4.76231	1.51943e-07	12.4363
putative endoglucanase	COG1363	Amino acid transport and metabolism|Carbohydrate transport and metabolism	NP_388901.1	-	yhfE	+	1095063	1096103	1041	CDS	6.77827	0.302778	0.311793	0.422631	2.23779	4.67089e-13	2.4582e-11	1.23352	0.422631	4.71673	2.4582e-11	49.3399
iron hydroxamate-binding lipoprotein	COG0614	Inorganic ion transport and metabolism	NP_388044.1	-	feuA	-	182370	183323	954	CDS	8.97479	0.279546	0.449846	0.563236	2.22427	8.07982e-09	1.4676e-07	1.21381	0.563236	4.67273	1.4676e-07	166.835
putative glycosyltransferase	COG1819	Carbohydrate transport and metabolism	NP_389824.2	-	yojK	-	2117051	2118268	1218	CDS	3.89344	1.28376	0.000190549	0.000814793	2.21906	1.07475e-10	3.0852e-09	2.43472	0.000814793	4.65589	3.0852e-09	5.61651
anthranilate phosphoribosyltransferase	COG0547	Amino acid transport and metabolism	NP_390148.2	-	trpD	-	2374881	2375897	1017	CDS	7.12228	6.77848	6.92814e-36	4.74e-33	2.21712	3.08701e-06	2.66783e-05	109.78	4.74e-33	4.64963	2.66783e-05	3.47032
maltose and maltodextrin ABC transporter subunit (ATP-binding protein)	COG1132	Defense mechanisms	NP_388702.1	yes	malQ	+	893904	895625	1722	CDS	6.46441	1.12555	0.000221649	0.000925605	2.21331	1.3215e-12	6.45804e-11	2.18185	0.000925605	4.63737	6.45804e-11	31.8181
dipeptide ABC transporter (dipeptide-binding lipoprotein)	COG4166	Amino acid transport and metabolism	NP_389179.2	1	dppE	+	1364151	1365800	1650	CDS	3.28674	-0.253055	0.572425	0.674843	2.21291	2.51793e-07	2.98731e-06	-1.19173	0.674843	4.63608	2.98731e-06	4.47086
hypothetical protein, phage SPbeta	undefined	undefined	NP_389986.1	-	yonP	+	2222340	2222534	195	CDS	0.556585	-0.542222	0.505861	0.614548	2.21181	0.000486217	0.00213925	-1.45621	0.614548	4.63255	0.00213925	0.530333
putative hydrolase	COG0596	Coenzyme transport and metabolism|General function prediction only	NP_390264.1	-	yqjL	+	2476969	2477730	762	CDS	8.98376	5.14143	1.10889e-18	5.91167e-17	2.20304	1.76664e-05	0.000122089	35.296	5.91167e-17	4.60447	0.000122089	36.9649
putative acetyl-transferase	COG1247	Amino acid transport and metabolism			yuaI	-	3179926	3180447	522	CDS	4.87735	-1.41038	0.00653905	0.0171739	2.20301	1.98995e-05	0.000134134	-2.65808	0.0171739	4.60439	0.000134134	16.9641
putative formate dehydrogenase	COG3383	General function prediction only	NP_389098.1	-	yjgC	+	1285591	1288548	2958	CDS	7.67672	0.872508	0.0446193	0.0878476	2.20253	9.74843e-07	9.96701e-06	1.83084	0.0878476	4.60285	9.96701e-06	88.7671
putative endonuclease, phage SPbeta	undefined	undefined	NP_389941.1	-	yoqL	-	2196389	2197081	693	CDS	1.7704	0.520749	0.431008	0.546077	2.19715	0.000530056	0.00228834	1.4347	0.546077	4.58573	0.00228834	1.25945
tRNA-Ile	undefined	undefined			trnB-Ile2	-	3172155	3172231	77	tRNA	1.42207	-0.182953	0.776869	0.841881	2.19495	0.00010868	0.000578642	-1.1352	0.841881	4.57875	0.000578642	1.2374
putative pyrroline-5'-carboxylate reductase	COG0345	Amino acid transport and metabolism	NP_390438.1	-	comER	+	2641214	2642035	822	CDS	2.02472	5.41593	4.66817e-18	2.20263e-16	2.19241	0.0167547	0.0418358	42.693	2.20263e-16	4.57069	0.0418358	0.167907
hypothetical protein, phage SPbeta	undefined	undefined	NP_389935.1	-	yoqS	-	2194053	2194400	348	CDS	0.45622	0.759329	0.339429	0.452682	2.19007	0.00205834	0.00734737	1.6927	0.452682	4.56328	0.00734737	0.424768
NADPH-dependent flavin oxidoreductase	COG1902	Energy production and conversion	NP_390263.1	-	yqjM	+	2475843	2476859	1017	CDS	6.61853	-0.391762	0.232345	0.335129	2.16433	1.35036e-10	3.79673e-09	-1.31199	0.335129	4.48258	3.79673e-09	51.6897
cysteine dioxygenase	COG5553	General function prediction only			cdoA	+	3193863	3194348	486	CDS	0.181194	0.121726	0.887758	0.923763	2.16361	0.0025535	0.00884566	1.08804	0.923763	4.48035	0.00884566	0.414475
hypothetical protein	undefined	undefined	YP_003097707.1	-	yjzF	+	1265530	1265661	132	CDS	0.250815	-0.771603	0.385896	0.501298	2.14881	0.00144845	0.00541025	-1.70717	0.501298	4.43462	0.00541025	0.451379
conserved hypothetical protein, PBSX phage	undefined	undefined	NP_389148.1	-	xkdM	+	1333804	1334247	444	CDS	4.89383	1.5816	2.38105e-05	0.000129289	2.14596	1.41909e-08	2.3395e-07	2.99303	0.000129289	4.42585	2.3395e-07	11.4728
putative flotillin-like protein	COG2268	Function unknown			yuaG	-	3180465	3181994	1530	CDS	6.90744	-1.96569	0.00024866	0.00101668	2.14007	6.42665e-05	0.000373674	-3.906	0.00101668	4.40782	0.000373674	74.2136
putative transcriptional regulator	COG1329	Transcription	NP_388394.1	-	ydeB	-	560151	560612	462	CDS	4.97407	-0.333426	0.401588	0.517426	2.1369	1.08576e-07	1.46053e-06	-1.26	0.517426	4.39815	1.46053e-06	16.8394
transcriptional regulator (LysR family)	COG0583	Transcription	NP_390818.1	-	ytlI	+	3008938	3009864	927	CDS	1.14841	1.30881	0.0772592	0.138675	2.13562	0.00359506	0.0117685	2.47736	0.138675	4.39425	0.0117685	0.83895
putative membrane protein involved in divalent ion export	COG1253	General function prediction only			yugS	-	3216163	3217452	1290	CDS	4.11817	-0.115845	0.721956	0.800866	2.13284	1.20961e-11	4.45837e-10	-1.08361	0.800866	4.38581	4.45837e-10	8.77867
hypothetical protein	undefined	undefined	NP_390255.1	1	yqjU	+	2468004	2468162	159	CDS	1.40959	-0.252397	0.685491	0.770309	2.13108	9.2292e-05	0.000507854	-1.19118	0.770309	4.38045	0.000507854	1.19138
decarboxylase involved in polyketide synthesis	COG1024	Lipid transport and metabolism	NP_389597.2	-	pksI	+	1792012	1792761	750	CDS	0.269574	0.575306	0.501373	0.609999	2.13096	0.00391226	0.0126058	1.48999	0.609999	4.38008	0.0126058	0.314936
putative metal-dependent protease/peptidase	COG2738	Posttranslational modification, protein turnover, chaperones			yugP	-	3217496	3218173	678	CDS	7.18505	0.935579	0.00143406	0.00478131	2.12973	1.66544e-12	7.94956e-11	1.91266	0.00478131	4.37637	7.94956e-11	61.3379
conserved hypothetical protein, phage SPbeta	undefined	undefined	NP_390021.1	-	yomF	+	2259475	2260296	822	CDS	1.14794	0.88176	0.206737	0.305217	2.12449	0.00107902	0.00421043	1.84262	0.305217	4.36049	0.00421043	0.661043
putative metal-dependent hydrolase	COG0491	General function prediction only	NP_389789.1	-	yobT	-	2081753	2082454	702	CDS	3.81192	0.208079	0.54542	0.650101	2.12186	2.88166e-10	7.39327e-09	1.15515	0.650101	4.35256	7.39327e-09	7.38541
tRNA-Asn	undefined	undefined			trnI-Asn	+	165754	165825	72	tRNA	0.6295	-1.12114	0.161155	0.25191	2.12042	0.00044544	0.0019897	-2.17519	0.25191	4.3482	0.0019897	0.749996
putative methyltransferase	COG2226	Coenzyme transport and metabolism	NP_388198.2	-	ycgJ	-	340613	341374	762	CDS	3.27202	0.791196	0.0311319	0.0655365	2.11701	2.90497e-09	5.78878e-08	1.73051	0.0655365	4.33795	5.78878e-08	3.87877
RNA polymerase ECF(extracytoplasmic function)-type sigma factor (sigma-Z)	COG1595	Transcription	NP_390561.1	-	sigZ	-	2742244	2742774	531	CDS	1.92819	0.133962	0.796424	0.857864	2.11463	7.87664e-06	5.95463e-05	1.0973	0.857864	4.33079	5.95463e-05	1.76317
putative integral inner membrane protein	undefined	undefined	NP_388820.1	yes	ygxB	-	1013958	1015616	1659	CDS	6.80507	0.683853	0.0814569	0.145005	2.11386	1.82705e-07	2.25905e-06	1.60642	0.145005	4.32848	2.25905e-06	53.0247
putative spore coat protein	COG5577	Cell wall/membrane/envelope biogenesis	NP_390573.1	-	yraF	+	2753065	2753433	369	CDS	0.0157433	1.40789	0.111986	0.189022	2.10498	0.0130888	0.033963	2.65349	0.189022	4.3019	0.033963	0.277739
component of the DNA transport platform	undefined	undefined	NP_390349.1	1	comGE	-	2556921	2557268	348	CDS	0.307263	1.29167	0.111701	0.188774	2.10123	0.00639035	0.0188994	2.44811	0.188774	4.29075	0.0188994	0.314936
putative exported protein	undefined	undefined	NP_389081.1	1	yjdB	-	1269733	1270080	348	CDS	1.58073	0.750031	0.192224	0.288583	2.10005	0.000103759	0.000558487	1.68183	0.288583	4.28724	0.000558487	1.14359
ribosomal RNA-5S	undefined	undefined			rrnH-5S	+	171197	171314	118	rRNA	1.46846	-1.86995	0.0232971	0.0516664	2.09783	0.00304221	0.0102869	-3.6552	0.0516664	4.28066	0.0102869	1.59497
putative CoA-binding protein	COG1832	General function prediction only	NP_389690.1	-	yneT	+	1932671	1933078	408	CDS	6.37617	1.54548	1.79728e-06	1.24206e-05	2.08941	1.96356e-10	5.16692e-09	2.91901	1.24206e-05	4.25575	5.16692e-09	29.6927
putative thioredoxin or thiol-disulfide isomerase	COG0526	Posttranslational modification, protein turnover, chaperones	NP_388432.1	-	ydfQ	+	598729	599067	339	CDS	2.02598	1.7396	0.000239659	0.00098775	2.08773	1.00648e-05	7.47127e-05	3.33943	0.00098775	4.2508	7.47127e-05	1.30121
hypothetical protein, phage SPbeta	undefined	undefined	NP_389957.1	-	yopV	-	2202805	2202999	195	CDS	1.7223	-0.513927	0.389183	0.50477	2.08555	7.66903e-05	0.000432436	-1.42793	0.50477	4.24437	0.000432436	1.79259
acetoin dehydrogenase E1 component (TPP-dependent alpha subunit)	COG1071	Energy production and conversion	NP_388687.1	-	acoA	+	879002	880003	1002	CDS	1.03922	0.492748	0.527789	0.634057	2.08488	0.00280096	0.0095896	1.40712	0.634057	4.24239	0.0095896	0.513721
conserved hypothetical protein	undefined	undefined		-	yrzP	+	2755987	2756181	195	CDS	1.31957	2.46529	5.53139e-05	0.000271607	2.08455	0.00122162	0.00467356	5.52236	0.000271607	4.24142	0.00467356	0.551211
hypothetical protein	undefined	undefined	NP_388757.2	-	ygzA	+	954291	954494	204	CDS	2.63771	-0.457944	0.299167	0.410181	2.07853	2.42277e-07	2.89113e-06	-1.37358	0.410181	4.22375	2.89113e-06	3.74057
glycerol-3-phosphate phosphatase	COG0637	Carbohydrate transport and metabolism|General function prediction only	NP_388805.1	-	glpW	+	997724	998386	663	CDS	6.38973	-0.597324	0.0448305	0.0882211	2.07337	7.05258e-12	2.75722e-10	-1.51291	0.0882211	4.20868	2.75722e-10	47.5841
indole-3-glycerol phosphate synthase	COG0134	Amino acid transport and metabolism	NP_390147.3	-	trpC	-	2374139	2374888	750	CDS	6.68523	6.83301	3.13965e-34	1.43203e-31	2.06991	3.96434e-05	0.000244716	114.009	1.43203e-31	4.1986	0.000244716	2.46568
conserved hypothetical protein	undefined	undefined	NP_390360.1	yes	yqgW	+	2565715	2565888	174	CDS	6.46907	1.33037	0.000272396	0.00110275	2.06765	2.80239e-08	4.30854e-07	2.51467	0.00110275	4.19203	4.30854e-07	28.9619
putative hydrolase	COG2382	Inorganic ion transport and metabolism	NP_389068.1	-	yjcH	-	1257414	1258136	723	CDS	7.58394	0.779723	0.0163777	0.0380263	2.06626	6.70369e-10	1.55472e-08	1.7168	0.0380263	4.18801	1.55472e-08	90.966
putative hydrolase	COG0491	General function prediction only	NP_389590.1	-	pksB	+	1782713	1783390	678	CDS	2.85181	1.18799	0.00712083	0.0184772	2.06596	2.44102e-06	2.17505e-05	2.27836	0.0184772	4.18712	2.17505e-05	3.06467
conserved hypothetical protein, phage SPbeta	undefined	undefined	NP_389998.1	-	yonB	+	2236269	2237285	1017	CDS	3.76181	0.642774	0.256609	0.363619	2.06513	0.000301777	0.00142064	1.56133	0.363619	4.18471	0.00142064	4.29266
putative acetyltransferase	COG0456	Translation, ribosomal structure and biogenesis	NP_391830.2	-	yxeL	-	4060307	4060804	498	CDS	1.54161	-0.874531	0.153944	0.243053	2.06402	0.000105224	0.000564292	-1.83341	0.243053	4.18149	0.000564292	1.71112
hypothetical protein	undefined	undefined	NP_390235.1	-	yqkK	-	2451148	2451363	216	CDS	2.08695	-1.53821	0.00695578	0.0181177	2.05926	1.37313e-05	9.71845e-05	-2.90433	0.0181177	4.16772	9.71845e-05	2.63388
class III stress response-related ATPase, AAA+ superfamily	COG0542	Posttranslational modification, protein turnover, chaperones	NP_387967.1	-	clpC	+	103572	106004	2433	CDS	10.1232	0.728981	0.0369905	0.0753952	2.05334	1.30719e-08	2.18131e-07	1.65747	0.0753952	4.15065	2.18131e-07	470.544
heme-degrading monooxygenase	COG2329	Coenzyme transport and metabolism	NP_388891.1	-	hmoB	-	1083229	1083729	501	CDS	8.07123	0.625401	0.0668332	0.12294	2.04775	6.17902e-09	1.14256e-07	1.54264	0.12294	4.13462	1.14256e-07	117.858
hypothetical protein, phage SPbeta	undefined	undefined	NP_389983.1	1	yonT	-	2219784	2219960	177	CDS	2.41215	-0.605782	0.321326	0.432757	2.0398	0.000502691	0.0021934	-1.5218	0.432757	4.11189	0.0021934	3.01865
ammonium transporter	COG0004	Inorganic ion transport and metabolism	NP_391532.1	yes	amtB	+	3756790	3758004	1215	CDS	5.92347	-1.96754	0.000420389	0.00162955	2.03817	0.000217114	0.00106482	-3.91099	0.00162955	4.10725	0.00106482	37.2522
putative integral inner membrane protein	undefined	undefined	NP_391579.1	yes	ywlA	+	3795491	3795853	363	CDS	6.07265	0.771098	0.00703794	0.0183201	2.03723	2.82921e-12	1.29043e-10	1.70657	0.0183201	4.10455	1.29043e-10	29.3203
general stress protein	COG3729	General function prediction only	NP_388321.1	-	gsiB	+	494506	494877	372	CDS	7.93756	1.85079	8.91215e-05	0.000414319	2.0353	1.84619e-05	0.0001261	3.60696	0.000414319	4.09908	0.0001261	79.5657
putative monooxygenase	COG2141	Coenzyme transport and metabolism|General function prediction only	NP_390811.1	-	ytmO	-	3003345	3004349	1005	CDS	0.0848848	1.80433	0.0338561	0.0700853	2.03264	0.0182214	0.0449782	3.49266	0.0700853	4.09153	0.0449782	0.225689
ATP-binding cassette efflux transporter	COG0488	General function prediction only	NP_388442.1	-	vmlR	-	604736	606379	1644	CDS	5.35057	0.75263	0.0137049	0.0325007	2.03058	5.68772e-11	1.7688e-09	1.68486	0.0325007	4.08569	1.7688e-09	19.0219
hypothetical protein, phage SPbeta	undefined	undefined	NP_390011.1	-	yomO	+	2244230	2244730	501	CDS	0.554138	0.714426	0.420805	0.536628	2.02776	0.0143164	0.0367076	1.64083	0.536628	4.07771	0.0367076	0.455939
penicillin V acylase	COG3049	Cell wall/membrane/envelope biogenesis|General function prediction only	NP_391833.2	-	yxeI	-	4062543	4063529	987	CDS	5.02593	1.02053	0.00181247	0.00583088	2.02698	9.41733e-10	2.11247e-08	2.02866	0.00583088	4.0755	2.11247e-08	13.6422
hypothetical protein, phage SPbeta	undefined	undefined	NP_389982.1	-	yonU	-	2219281	2219469	189	CDS	5.44087	1.19331	0.000180262	0.000774845	2.02678	3.65974e-10	9.21671e-09	2.28677	0.000774845	4.07495	9.21671e-09	18.1993
hypothetical protein, phage SPbeta	undefined	undefined	NP_389905.1	-	yorW	-	2170771	2171136	366	CDS	0.0686479	-0.93037	0.409032	0.524875	2.01499	0.0245162	0.0572789	-1.90576	0.524875	4.04178	0.0572789	0.3564
ribosomal RNA-23S	undefined	undefined			rrnA-23S	+	32177	35103	2927	rRNA	4.89113	-2.66595	3.49195e-13	8.38271e-12	2.01205	6.9749e-10	1.60854e-08	-6.34646	8.38271e-12	4.03354	1.60854e-08	21.8703
tRNA-Met	undefined	undefined			trnB-Met2	-	3172600	3172676	77	tRNA	1.98649	-1.52795	0.00269751	0.0081601	2.00823	1.71038e-07	2.14058e-06	-2.88376	0.0081601	4.02288	2.14058e-06	2.34099
sulfur-containing amino acid ABC transporter binding lipoprotein	COG0834	Amino acid transport and metabolism|Signal transduction mechanisms	NP_390815.1	1	tcyK	-	3006600	3007412	813	CDS	-0.14851	2.18858	0.0210603	0.0472935	2.00468	0.0424125	0.089238	4.55858	0.0472935	4.013	0.089238	0.1782
Na+/H+ antiporter	COG0025	Inorganic ion transport and metabolism	NP_391222.1	yes	nhaK	-	3428331	3430343	2013	CDS	8.29981	1.20058	2.51994e-05	0.000136152	2.00461	5.75823e-12	2.29491e-10	2.29831	0.000136152	4.0128	2.29491e-10	125.966
2-amino-3-ketobutyrate CoA ligase (glycine acetyl transferase)	COG0156	Coenzyme transport and metabolism	NP_389582.1	-	kbl	+	1771517	1772695	1179	CDS	4.58259	1.29454	0.00230054	0.0071323	2.00407	3.15933e-06	2.71887e-05	2.45299	0.0071323	4.01131	2.71887e-05	7.87415
putative membrane integrity integral membrane protein	undefined	undefined		yes	yuaF	-	3182015	3182539	525	CDS	6.45317	-2.28194	8.1613e-05	0.000383759	1.99723	0.000434547	0.00194953	-4.86332	0.000383759	3.99232	0.00194953	58.8944
transcriptional regulator	COG3284	Transcription	NP_388691.1	-	acoR	+	883758	885575	1818	CDS	5.66857	-0.24105	0.517097	0.624686	1.99628	1.27018e-07	1.67145e-06	-1.18185	0.624686	3.9897	1.67145e-06	22.8102
DNA channel for uptake in competent cells	COG0658	General function prediction only	NP_390435.1	yes	comEC	-	2637543	2639873	2331	CDS	5.19934	0.172945	0.575072	0.67738	1.99431	1.50403e-10	4.13678e-09	1.12736	0.67738	3.98425	4.13678e-09	20.2947
putative glycosyltransferase	COG1819	Carbohydrate transport and metabolism	NP_389104.1	-	yjiC	+	1292557	1293735	1179	CDS	4.20695	1.34425	0.000322468	0.00128518	1.99146	1.21916e-07	1.61441e-06	2.53899	0.00128518	3.9764	1.61441e-06	6.8811
putative monooxygenase (cytochrome P450)	COG2124	Secondary metabolites biosynthesis, transport and catabolism|Defense mechanisms	NP_389103.1	-	yjiB	+	1291344	1292534	1191	CDS	4.06167	1.34399	0.00196977	0.00624395	1.97289	6.81656e-06	5.36053e-05	2.53853	0.00624395	3.92553	5.36053e-05	6.77349
hypothetical protein, phage SPbeta	undefined	undefined	NP_389939.1	-	yoqN	-	2195564	2195782	219	CDS	-0.0332144	-0.899584	0.404817	0.520605	1.96084	0.0188982	0.0463979	-1.86553	0.520605	3.8929	0.0463979	0.335815
conserved hypothetical protein, phage SPbeta	undefined	undefined	NP_390015.1	yes	yomL	-	2246656	2247342	687	CDS	4.82432	3.53261	5.58124e-21	4.01947e-19	1.94334	2.22637e-07	2.69258e-06	11.5723	4.01947e-19	3.84594	2.69258e-06	4.49115
conserved hypothetical protein	COG0663	General function prediction only			ytoA	+	3123490	3124005	516	CDS	5.4955	0.941477	0.0026035	0.00792832	1.93001	1.17834e-09	2.60058e-08	1.92049	0.00792832	3.81059	2.60058e-08	19.8575
AdoMet riboswitch	undefined	undefined			mswF	-	2025160	2025251	92	No_CDS	0.325085	1.52084	0.065615	0.121056	1.92998	0.0184367	0.0454006	2.86958	0.121056	3.8105	0.0454006	0.346107
putative peroxiredoxin-related protein	COG1764	Defense mechanisms	NP_389610.1	-	ymaD	+	1864225	1864677	453	CDS	5.175	-0.117519	0.747075	0.817798	1.9298	1.64331e-07	2.08848e-06	-1.08487	0.817798	3.81001	2.08848e-06	19.9007
long chain acyl-CoA ligase (degradative)	COG0318	Lipid transport and metabolism|Secondary metabolites biosynthesis, transport and catabolism	NP_390734.1	-	lcfA	-	2918646	2920328	1683	CDS	7.05867	-0.219096	0.480252	0.591422	1.9218	1.54411e-09	3.37157e-08	-1.164	0.591422	3.78896	3.37157e-08	73.1248
putative RNA ligase or phosphoesterase	COG1514	Translation, ribosomal structure and biogenesis	NP_389067.1	-	yjcG	-	1256862	1257377	516	CDS	7.54486	0.946052	0.00241533	0.00741027	1.91664	1.88578e-09	4.01094e-08	1.92659	0.00741027	3.77542	4.01094e-08	85.9483
DNA repair protein, 6-O-methylguanine-DNA methyltransferase	COG1066	Posttranslational modification, protein turnover, chaperones	NP_387968.1	-	radA	+	106096	107472	1377	CDS	8.48997	2.89298	2.50461e-16	9.88597e-15	1.91632	1.90768e-08	3.0885e-07	7.42801	9.88597e-15	3.77459	3.0885e-07	87.9847
hypothetical protein	undefined	undefined	NP_391772.1	1	yxjJ	+	3996829	3997092	264	CDS	5.26479	0.803556	0.122628	0.203801	1.91483	0.000323373	0.00149909	1.7454	0.203801	3.7707	0.00149909	18.6871
conserved hypothetical protein	COG4843	Function unknown	NP_388521.2	yes	yebE	+	697538	698092	555	CDS	6.16824	1.52357	0.00014928	0.000654696	1.91389	2.44663e-06	2.17505e-05	2.87501	0.000654696	3.76824	2.17505e-05	23.677
putative factor required for spore cortex formation	COG3314	Function unknown	NP_389386.1	yes	ylbJ	-	1570574	1571800	1227	CDS	1.1714	0.489854	0.35968	0.47445	1.91343	5.80712e-05	0.000340546	1.4043	0.47445	3.76704	0.000340546	1.03376
conserved hypothetical protein	undefined	undefined	NP_391975.1	-	yyaC	+	4204900	4205517	618	CDS	0.821499	-1.60201	0.0360432	0.0737207	1.90474	0.000327092	0.00151036	-3.03565	0.0737207	3.74443	0.00151036	0.834683
succinate-semialdehyde dehydrogenase	COG1012	Energy production and conversion	NP_388273.1	-	gabD	+	442950	444338	1389	CDS	8.2941	1.49455	9.96194e-07	7.40272e-06	1.90322	7.40336e-10	1.69781e-08	2.81776	7.40272e-06	3.74047	1.69781e-08	103.364
tRNA-Leu	undefined	undefined			trnD-Leu2	+	953213	953294	82	tRNA	1.00589	-0.640127	0.332853	0.445504	1.90228	0.00059368	0.00252807	-1.55847	0.445504	3.73803	0.00252807	1.10213
sulfite reductase (hemoprotein beta-subunit)	COG0155	Inorganic ion transport and metabolism	NP_391223.1	-	cysI	-	3430598	3432313	1716	CDS	6.49911	0.554863	0.194869	0.292055	1.89988	1.54149e-05	0.000107799	1.46903	0.292055	3.73183	0.000107799	43.0001
small acid-soluble spore protein	undefined	undefined	YP_054573.1	-	sspK	-	928112	928264	153	CDS	0.113518	2.08782	0.0277685	0.0595952	1.89851	0.0560901	0.111935	4.25104	0.0595952	3.72828	0.111935	0.1782
putative permease	COG4209	Carbohydrate transport and metabolism	-	yes	yteP	-	3082260	3083225	966	CDS	0.159866	1.4781	0.0969685	0.1669	1.88668	0.0316862	0.0704615	2.78582	0.1669	3.69785	0.0704615	0.225689
putative manganese-containing catalase	COG3546	Inorganic ion transport and metabolism	NP_388324.1	-	ydbD	-	495740	496561	822	CDS	6.87688	1.11138	0.00636913	0.0168353	1.88088	5.85655e-06	4.65013e-05	2.16052	0.0168353	3.683	4.65013e-05	40.1708
superoxide dismutase	COG0605	Inorganic ion transport and metabolism	NP_389815.1	-	sodF	+	2104056	2104901	846	CDS	1.07163	1.82794	0.00770311	0.0197155	1.87259	0.00702621	0.0204654	3.5503	0.0197155	3.6619	0.0204654	0.571797
hypothetical protein	undefined	undefined	YP_003097708.1	-	yjzG	+	1265677	1265850	174	CDS	0.425874	-2.01731	0.0311929	0.0655977	1.86844	0.00598027	0.0178798	-4.04827	0.0655977	3.65138	0.0178798	0.73941
prespore-specific regulatory gene	undefined	undefined	NP_391642.1	-	rsfA	+	3861437	3862213	777	CDS	1.01651	2.37008	0.00172116	0.00558968	1.86835	0.0202203	0.0492023	5.16971	0.00558968	3.65115	0.0492023	0.314936
putative nucleotide binding protein	COG1090	General function prediction only	NP_388732.1	-	yfhF	-	924633	925544	912	CDS	5.68163	0.456759	0.452136	0.564933	1.86555	0.00278573	0.00955339	1.37246	0.564933	3.64407	0.00955339	23.674
conserved hypothetical protein	undefined	undefined	NP_389734.1	-	yoxB	+	2019797	2020567	771	CDS	4.85665	1.18681	0.0146832	0.034581	1.86488	0.000156758	0.000795417	2.27649	0.034581	3.64238	0.000795417	12.6199
putative oxidoreductase	COG1063	Amino acid transport and metabolism|General function prediction only	NP_389115.1	-	yjmD	+	1304442	1305461	1020	CDS	0.89205	1.40365	0.0385164	0.0777651	1.84771	0.00566245	0.0172053	2.64569	0.0777651	3.59928	0.0172053	0.461965
1,4-alpha-glucan branching enzyme	COG0296	Carbohydrate transport and metabolism			glgB	-	3169763	3171646	1884	CDS	2.32577	-1.27429	0.00602726	0.0160349	1.84113	1.72035e-06	1.63095e-05	-2.41879	0.0160349	3.58291	1.63095e-05	3.32153
hypothetical protein, phage SPbeta	undefined	undefined	NP_389942.1	-	yoqK	-	2197121	2197324	204	CDS	0.343165	0.332161	0.666415	0.754658	1.83362	0.00631552	0.0187321	1.2589	0.754658	3.5643	0.0187321	0.461965
tRNA-Gly	undefined	undefined			trnSL-Gly1	+	967065	967138	74	tRNA	2.46911	1.73822	0.000285137	0.00114866	1.82378	0.00017073	0.000858882	3.33623	0.00114866	3.54007	0.000858882	1.74259
putative thiol management oxidoreductase component	COG2346	Inorganic ion transport and metabolism	NP_389038.1	-	yjbI	-	1234510	1234908	399	CDS	6.35616	2.15828	6.90036e-12	1.33613e-10	1.82236	5.62145e-09	1.0537e-07	4.46381	1.33613e-10	3.53659	1.0537e-07	28.5123
putative NADH-dependent butanol dehydrogenase	COG1979	Energy production and conversion		-	yugJ	-	3223471	3224634	1164	CDS	9.17766	0.998459	0.000809693	0.00290287	1.819	2.24976e-09	4.59065e-08	1.99786	0.00290287	3.52837	4.59065e-08	258.421
conserved hypothetical protein	undefined	undefined			yuzE	+	3263835	3264224	390	CDS	2.9975	0.836896	0.0347564	0.0715882	1.81239	3.32202e-06	2.846e-05	1.7862	0.0715882	3.51223	2.846e-05	3.77262
hypothetical protein	undefined	undefined	NP_389308.1	-	yknT	-	1494403	1495368	966	CDS	0.226423	4.06384	8.42279e-06	5.04753e-05	1.81002	0.14315	0.237089	16.7239	5.04753e-05	3.50648	0.237089	0.0995393
putative UTP-glucose-1-phosphate uridylyltransferase (UDP-glucose pyrophosphorylase)	undefined	undefined			yvzE	+	3672929	3673525	597	CDS	4.55031	0.592648	0.0536497	0.10272	1.8016	4.57901e-09	8.70224e-08	1.50801	0.10272	3.48606	8.70224e-08	12.807
two-component response regulator [YkoH]	COG0745	Signal transduction mechanisms|Transcription	NP_389208.1	-	ykoG	+	1391953	1392639	687	CDS	3.49055	1.15379	0.000889077	0.00314897	1.80099	1.91759e-07	2.34977e-06	2.22498	0.00314897	3.48458	2.34977e-06	4.80153
acetoin reductase/2,3-butanediol dehydrogenase	COG1063	Amino acid transport and metabolism|General function prediction only	NP_388505.1	-	bdhA	-	677911	678951	1041	CDS	9.50695	1.78584	1.34427e-07	1.22627e-06	1.79913	1.10749e-07	1.48086e-06	3.44819	1.22627e-06	3.4801	1.48086e-06	214.852
peptide methionine S-sulfoxide reductase	COG0225	Posttranslational modification, protein turnover, chaperones	NP_390052.1	-	msrA	-	2287529	2288062	534	CDS	6.00351	2.51939	1.09066e-16	4.38936e-15	1.79326	2.37031e-09	4.79317e-08	5.73341	4.38936e-15	3.46596	4.79317e-08	17.9693
aminomethyltransferase (glycine cleavage system protein T)	COG0404	Amino acid transport and metabolism	NP_390337.2	-	gcvT	-	2548245	2549333	1089	CDS	5.50221	1.2219	0.000516355	0.001959	1.79189	4.95277e-07	5.42163e-06	2.33254	0.001959	3.46268	5.42163e-06	22.2264
sodium-cystine symporter	COG1823	Amino acid transport and metabolism	NP_388794.1	yes	tcyP	+	986986	988377	1392	CDS	7.42159	-0.0845303	0.874392	0.915424	1.78966	0.0011382	0.00440528	-1.06034	0.915424	3.45734	0.00440528	104.871
forespore-specific anti-sigma factor	undefined	undefined	NP_387905.1	-	csfB	+	35531	35725	195	CDS	3.57033	-3.34998	7.14004e-13	1.62833e-11	1.78532	1.29217e-06	1.28125e-05	-10.1963	1.62833e-11	3.44696	1.28125e-05	10.0539
putative N-acetyltransferase	COG1670	Translation, ribosomal structure and biogenesis|Posttranslational modification, protein turnover, chaperones	NP_389735.2	-	yoaA	+	2020611	2021144	534	CDS	4.4143	0.978857	0.0355545	0.0728363	1.78508	0.000154334	0.000787038	1.9709	0.0728363	3.44638	0.000787038	9.94402
putative conserved membrane protein	undefined	undefined		yes	ytvB	-	3105470	3105805	336	CDS	2.89663	1.16711	0.00230214	0.0071323	1.78445	2.54466e-06	2.24641e-05	2.24561	0.0071323	3.44486	2.24641e-05	3.41534
carbon starvation-induced membrane protein	COG1966	Signal transduction mechanisms	NP_390749.2	yes	cstA	-	2936382	2938178	1797	CDS	7.62662	-0.231543	0.498869	0.607493	1.78183	3.84233e-07	4.33317e-06	-1.17409	0.607493	3.43862	4.33317e-06	113.242
putative ABC transporter (ATP-binding protein)	COG1132	Defense mechanisms	NP_388703.1	yes	yfiC	+	895619	897433	1815	CDS	7.01936	1.2566	6.80905e-05	0.000325013	1.78155	2.47047e-08	3.84139e-07	2.38931	0.000325013	3.43796	3.84139e-07	48.5822
conserved hypothetical protein	COG3103	General function prediction only	NP_388737.1	1	yfhK	+	928803	929321	519	CDS	7.26141	0.360274	0.554925	0.659134	1.77915	0.00454981	0.0143448	1.28367	0.659134	3.43224	0.0143448	77.1156
aminoglycoside N3'-acetyltransferase	COG2746	Defense mechanisms	NP_390046.1	-	yokD	+	2281667	2282485	819	CDS	3.95603	0.465061	0.214646	0.314785	1.77708	2.13713e-06	1.94522e-05	1.38038	0.314785	3.42732	1.94522e-05	8.69545
transcriptional regulator (Fur family)	COG0735	Inorganic ion transport and metabolism	NP_388753.1	-	perR	+	944487	944924	438	CDS	8.54093	0.957771	0.00169369	0.00551794	1.77368	1.18673e-08	1.99652e-07	1.94231	0.00551794	3.41925	1.99652e-07	165.375
conserved hypothetical protein	COG0217	Transcription|Translation, ribosomal structure and biogenesis	NP_390660.1	-	yrbC	-	2843106	2843828	723	CDS	4.8188	1.43437	0.000242952	0.000998841	1.77076	6.91691e-06	5.42904e-05	2.70263	0.000998841	3.41233	5.42904e-05	12.6938
two-component response regulator [YycF]	COG0745	Signal transduction mechanisms|Transcription	NP_391921.1	-	walR	-	4153696	4154403	708	CDS	7.80196	2.05773	3.80806e-11	6.45955e-10	1.76881	1.03021e-08	1.7769e-07	4.16331	6.45955e-10	3.40774	1.7769e-07	73.4159
2,3-dihydroxybenzoate-AMP ligase	COG1021	Secondary metabolites biosynthesis, transport and catabolism			dhbE	-	3288641	3290260	1620	CDS	9.78419	-0.432792	0.201075	0.298738	1.76712	3.64701e-07	4.17018e-06	-1.34984	0.298738	3.40373	4.17018e-06	407.408
conserved hypothetical protein	COG2427	Function unknown	NP_389099.1	-	yjgD	+	1288541	1289101	561	CDS	4.69908	1.18941	0.00470104	0.0130302	1.76379	3.34416e-05	0.000211848	2.28059	0.0130302	3.39589	0.000211848	11.5703
putative RNA polymerase-associated helicase protein	COG0553	Transcription|Replication, recombination and repair	NP_390338.1	-	yqhH	+	2549775	2551448	1674	CDS	0.192708	2.41865	0.00178635	0.00575135	1.75967	0.0401071	0.0851292	5.34669	0.00575135	3.38621	0.0851292	0.25686
antiholin factor	COG1346	Cell wall/membrane/envelope biogenesis	NP_390768.1	yes	lrgB	-	2954492	2955187	696	CDS	7.80629	-0.0693198	0.894795	0.928732	1.75776	0.00110647	0.00430526	-1.04922	0.928732	3.38173	0.00430526	123.36
putative peroxiredoxin	COG2077	Posttranslational modification, protein turnover, chaperones	NP_390827.1	-	tpx	-	3017696	3018199	504	CDS	8.91972	-0.453844	0.152748	0.241351	1.75299	7.0684e-08	1.00749e-06	-1.36968	0.241351	3.37055	1.00749e-06	291.617
dipeptide ABC transporter (permease)	COG1173	Amino acid transport and metabolism|Inorganic ion transport and metabolism	NP_389177.1	yes	dppC	+	1362174	1363136	963	CDS	1.76422	-1.19751	0.0347893	0.0716199	1.75289	0.00023682	0.00114775	-2.29344	0.0716199	3.37032	0.00114775	2.12589
stage V sporulation protein AD	COG0332	Lipid transport and metabolism	NP_390222.1	-	spoVAD	-	2440775	2441791	1017	CDS	-0.0748744	1.48917	0.14982	0.237846	1.75187	0.0956639	0.172086	2.80728	0.237846	3.36796	0.172086	0.136736
myo-inositol transporter	COG2814	Carbohydrate transport and metabolism	NP_388504.1	yes	iolT	+	676442	677863	1422	CDS	3.56934	0.906613	0.0379324	0.076971	1.74266	6.86385e-05	0.000392158	1.87464	0.076971	3.34652	0.000392158	4.78433
putative transcriptional regulator, phage SPbeta	undefined	undefined	NP_389964.1	-	yopO	-	2207748	2207960	213	CDS	2.77118	-1.22145	0.0101001	0.0249165	1.73947	5.39948e-05	0.000320301	-2.33182	0.0249165	3.33913	0.000320301	4.85358
bacteriophage PBSX N-acetylmuramoyl-L-alanine amidase	COG3409	Cell wall/membrane/envelope biogenesis	NP_389164.1	-	xlyA	+	1347289	1348182	894	CDS	4.3316	1.7718	3.25487e-06	2.12759e-05	1.7365	5.40467e-06	4.34172e-05	3.4148	2.12759e-05	3.33226	4.34172e-05	7.93428
putative transcriptional regulator	COG1309	Transcription	NP_388896.1	-	yhgD	+	1089755	1090330	576	CDS	5.67708	-0.0286061	0.931866	0.954419	1.7362	3.12256e-07	3.61073e-06	-1.02003	0.954419	3.33157	3.61073e-06	31.251
tRNA-Thr	undefined	undefined			trnB-Thr	-	3173614	3173689	76	tRNA	3.75492	-1.26228	0.000471122	0.00180744	1.73614	1.6829e-07	2.12564e-06	-2.39875	0.00180744	3.33143	2.12564e-06	10.0624
protein tyrosine kinase	COG3869	Posttranslational modification, protein turnover, chaperones	NP_387966.1	-	mcsB	+	102484	103575	1092	CDS	8.58618	0.718246	0.0408027	0.0815293	1.73379	1.36755e-06	1.34623e-05	1.64518	0.0815293	3.32601	1.34623e-05	186.577
putative integrase, phage SPbeta	COG0582	Replication, recombination and repair|Mobilome: prophages, transposons	NP_390013.1	-	yomM	+	2245147	2246148	1002	CDS	1.84669	0.816993	0.283926	0.393224	1.73152	0.0213256	0.051134	1.76173	0.393224	3.32077	0.051134	1.15845
hypothetical protein, phage SPbeta	undefined	undefined	YP_003097750.1	yes	yoyJ	-	2219514	2219765	252	CDS	4.79717	-0.592753	0.104588	0.177999	1.7246	2.09983e-06	1.91551e-05	-1.50812	0.177999	3.30488	1.91551e-05	19.1342
tRNA-Thr	undefined	undefined			trnJ-Thr	+	95455	95530	76	tRNA	3.90617	-1.00401	0.0238559	0.0527917	1.72401	6.58234e-05	0.000380035	-2.00557	0.0527917	3.30354	0.000380035	11.0429
conserved hypothetical protein	undefined	undefined	NP_388844.1	-	yhdX	+	1038653	1038760	108	CDS	4.1829	3.70396	2.18214e-10	3.31765e-09	1.72204	0.00253524	0.00879727	13.0318	3.31765e-09	3.29903	0.00879727	2.66505
two-component sensor histidine kinase [DesR]	COG4585	Signal transduction mechanisms	NP_389800.1	yes	desK	+	2090574	2091686	1113	CDS	4.41002	2.0111	1.86287e-09	2.38227e-08	1.71985	3.51621e-07	4.03185e-06	4.03089	2.38227e-08	3.29403	4.03185e-06	7.13532
regulator of iron homeostasis	undefined	undefined		1	fbpC	-	2316286	2316375	90	CDS	0.887814	1.37034	0.0546845	0.104167	1.70856	0.0162517	0.0409534	2.58532	0.104167	3.26834	0.0409534	0.582383
conserved hypothetical protein	COG1307	Lipid transport and metabolism	NP_388992.1	1	yitS	-	1187700	1188551	852	CDS	6.26072	0.151386	0.617708	0.713676	1.69833	3.69556e-08	5.5773e-07	1.11064	0.713676	3.24524	5.5773e-07	45.4033
lytic transglycosylase, SPbeta phage protein	COG0739	Cell wall/membrane/envelope biogenesis	NP_390018.2	1	cwlP	+	2249154	2256011	6858	CDS	4.18567	1.60695	0.000141912	0.000626396	1.69159	6.67863e-05	0.000385053	3.04606	0.000626396	3.23013	0.000385053	6.50604
hypothetical protein, SPbeta phage	COG2433	General function prediction only	NP_390020.1	-	yomG	+	2256832	2259459	2628	CDS	2.5042	0.800729	0.170888	0.262563	1.69007	0.00363756	0.0118792	1.74198	0.262563	3.22672	0.0118792	2.37158
tRNA-Phe	undefined	undefined			trnY-Phe	-	4154787	4154859	73	tRNA	1.50273	-2.84973	0.000227112	0.000945533	1.68813	0.00398728	0.0127773	-7.20864	0.000945533	3.22238	0.0127773	2.10501
putative phospho-adenylylsulfate sulfotransferase	COG0175	Amino acid transport and metabolism|Coenzyme transport and metabolism	NP_388974.2	-	yitB	-	1171755	1172465	711	CDS	-0.155376	0.506073	0.567794	0.670733	1.68758	0.0387858	0.0830112	1.42018	0.670733	3.22116	0.0830112	0.377278
tRNA-Thr	undefined	undefined			trnD-Thr	+	952212	952284	73	tRNA	-0.136805	0.0207414	0.982698	0.989689	1.68175	0.0386787	0.0828252	1.01448	0.989689	3.20816	0.0828252	0.335521
putative acyltransferase	COG1670	Translation, ribosomal structure and biogenesis|Posttranslational modification, protein turnover, chaperones	NP_388052.2	-	ybbJ	-	193075	193557	483	CDS	1.85524	-0.726746	0.122423	0.203542	1.68153	1.87133e-05	0.000127182	-1.6549	0.203542	3.20768	0.000127182	2.28777
defective prophage PBSX putative enzyme	undefined	undefined	NP_389162.1	yes	xhlA	+	1346731	1347000	270	CDS	3.12756	1.55764	0.000140343	0.000620808	1.67175	4.99132e-05	0.000298679	2.94373	0.000620808	3.186	0.000298679	3.87643
lysine 2,3-aminomutase	COG1509	Amino acid transport and metabolism	NP_389850.1	-	kamA	-	2139454	2140869	1416	CDS	0.141441	1.25702	0.14305	0.230373	1.66577	0.0502053	0.102365	2.39002	0.230373	3.17282	0.102365	0.314642
thiamine pyrophosphate riboswitch	undefined	undefined			tswC	+	3179105	3179206	102	No_CDS	7.71106	2.67148	2.16343e-09	2.69936e-08	1.66514	0.000116375	0.000613246	6.37081	2.69936e-08	3.17144	0.000613246	51.4129
tRNA-Val	undefined	undefined			trnSL-Val2	+	1262789	1262861	73	tRNA	1.93207	-1.40977	0.015756	0.0368328	1.66032	0.00104024	0.00408238	-2.65696	0.0368328	3.16087	0.00408238	2.74401
urate oxidase with peroxide reductase N-terminal domain	COG3195	Nucleotide transport and metabolism			pucL	+	3333162	3334646	1485	CDS	3.42138	-0.175481	0.650098	0.740059	1.65897	9.95417e-06	7.40251e-05	-1.12934	0.740059	3.15791	7.40251e-05	6.64365
enzyme for molybdopterin cofactor synthesis required for xanthine dehydrogenase	COG2068	Coenzyme transport and metabolism			pucB	-	3339331	3339948	618	CDS	0.0124203	-0.322874	0.719362	0.798967	1.65795	0.0248703	0.0579083	-1.25082	0.798967	3.15569	0.0579083	0.466525
small untranslated regulatory RNA	undefined	undefined			bsrF	+	2079096	2079203	108	No_CDS	1.0981	-0.223414	0.718269	0.797969	1.65742	0.00283938	0.00970291	-1.16749	0.797969	3.15452	0.00970291	1.24343
conserved hypothetical protein, phage SPbeta	undefined	undefined	NP_390008.1	-	yomR	+	2242414	2243631	1218	CDS	2.41223	1.1944	0.0847145	0.150023	1.65254	0.0170043	0.0423818	2.28849	0.150023	3.14387	0.0423818	1.37987
nitrogen-regulated PII-like regulator protein	COG0347	Signal transduction mechanisms|Amino acid transport and metabolism	NP_391533.1	-	glnK	+	3758016	3758366	351	CDS	5.72853	1.34374	0.000149135	0.000654696	1.64241	4.31126e-06	3.5753e-05	2.53809	0.000654696	3.12188	3.5753e-05	22.0807
putative putative translocase with flippase function for teichoic acid synthesis, involved in spore	COG2244	Cell wall/membrane/envelope biogenesis	NP_390645.1	yes	spoVB	+	2829564	2831120	1557	CDS	2.1595	0.225224	0.587952	0.687981	1.64033	2.11571e-05	0.000141617	1.16896	0.687981	3.11736	0.000141617	2.47773
pyrroline-5-carboxylate reductase	COG0345	Amino acid transport and metabolism	NP_389730.2	-	proH	-	2016845	2017738	894	CDS	3.64004	0.735747	0.136847	0.222876	1.63825	0.000996329	0.00392885	1.66526	0.222876	3.11287	0.00392885	6.59646
putative metal-dependent hydrolase	COG2220	Carbohydrate transport and metabolism	NP_390819.2	-	ytkL	-	3009915	3010598	684	CDS	8.55642	1.2982	1.10454e-05	6.34142e-05	1.63682	3.95331e-08	5.92275e-07	2.45922	6.34142e-05	3.1098	5.92275e-07	147.597
putative dehydrogenase	COG1028	Lipid transport and metabolism|Secondary metabolites biosynthesis, transport and catabolism|General function prediction only	NP_388300.1	-	ydaD	+	471709	472569	861	CDS	7.44761	0.866743	0.113073	0.190545	1.63669	0.00327459	0.0109286	1.82354	0.190545	3.10951	0.0109286	72.6208
factor involved in motility	COG1388	Cell wall/membrane/envelope biogenesis	NP_390385.1	1	yqfZ	+	2588701	2589000	300	CDS	0.90537	1.91201	0.00590084	0.0157804	1.63464	0.0225478	0.0534328	3.76333	0.0157804	3.10511	0.0534328	0.52004
conserved hypothetical protein	COG2155	Function unknown			yuzA	+	3224864	3225100	237	CDS	4.63922	0.0551296	0.914137	0.941192	1.63395	0.00163408	0.00605405	1.03895	0.941192	3.10361	0.00605405	14.7166
small multidrug resistance efflux transporter	COG2076	Defense mechanisms	NP_389612.1	yes	ebrA	-	1865058	1865375	318	CDS	3.1016	2.05784	0.000157535	0.000685441	1.63345	0.00279179	0.00956618	4.16364	0.000685441	3.10253	0.00956618	2.85045
L-rhamnose mutarotase	COG3254	Cell wall/membrane/envelope biogenesis			rhaU	-	3199233	3199547	315	CDS	1.57309	-0.184696	0.757072	0.824345	1.6318	0.00363217	0.011871	-1.13658	0.824345	3.099	0.011871	1.65878
ribonuclease	COG0328	Replication, recombination and repair	NP_390080.2	-	ypeP	-	2308967	2309647	681	CDS	4.96689	1.57627	6.64579e-07	5.20629e-06	1.63091	3.09071e-07	3.584e-06	2.98198	5.20629e-06	3.09708	3.584e-06	13.2907
ribosomal RNA-5S	undefined	undefined			rrnA-5S	+	35237	35355	119	rRNA	2.56233	-1.36064	0.0163306	0.0379383	1.62996	0.00190208	0.00686722	-2.56799	0.0379383	3.09505	0.00686722	4.70023
putative transporter	undefined	undefined			yugM	-	3220301	3220672	372	CDS	5.31328	0.209073	0.501648	0.610153	1.62984	1.91173e-07	2.34959e-06	1.15595	0.610153	3.09479	2.34959e-06	21.1781
RNA polymerase sigma-54 factor (sigma-L)	COG1508	Transcription	NP_391300.1	-	sigL	-	3512498	3513808	1311	CDS	7.31503	0.262427	0.385867	0.501298	1.62956	1.32279e-07	1.72629e-06	1.19949	0.501298	3.09419	1.72629e-06	93.8959
cell division inhibitor	COG1388	Cell wall/membrane/envelope biogenesis	NP_389669.1	1	yneA	+	1918406	1918723	318	CDS	1.91914	1.18415	0.0214531	0.0480179	1.62823	0.00149941	0.00558536	2.27229	0.0480179	3.09134	0.00558536	1.61188
RNA degradation presenting factor (ribosomal protein S1 homolog)	COG0539	Translation, ribosomal structure and biogenesis	NP_390169.1	-	rpfA	-	2394664	2395812	1149	CDS	10.231	0.731197	0.0128053	0.0306686	1.62711	5.55591e-08	8.11638e-07	1.66002	0.0306686	3.08893	8.11638e-07	614.249
putative lipoprotein	undefined	undefined	NP_390559.1	1	yrpD	+	2739486	2740193	708	CDS	6.04831	-0.567464	0.113416	0.191043	1.6234	7.4041e-06	5.68109e-05	-1.48192	0.191043	3.08101	5.68109e-05	45.8795
ribose ABC transporter (permease)	COG1172	Carbohydrate transport and metabolism	NP_391476.1	yes	rbsC	+	3705165	3706133	969	CDS	8.18295	-0.327986	0.571227	0.673818	1.61624	0.00636039	0.0188379	-1.25526	0.673818	3.06575	0.0188379	117.486
conserved hypothetical protein	COG1331	General function prediction only	NP_391959.1	-	yyaO	+	4189406	4189645	240	CDS	3.17406	1.68761	3.29656e-06	2.15141e-05	1.61355	1.36201e-05	9.65642e-05	3.22123	2.15141e-05	3.06004	9.65642e-05	3.24287
hypothetical protein	undefined	undefined	NP_390211.1	1	ypuD	-	2431737	2432081	345	CDS	5.16819	2.34307	4.88474e-12	9.73392e-11	1.60933	1.76669e-06	1.67103e-05	5.07382	9.73392e-11	3.05109	1.67103e-05	12.2887
preQ1 riboswitch	undefined	undefined			qswA	+	1439274	1439318	45	No_CDS	0.596139	1.37697	0.038529	0.0777651	1.60756	0.0165773	0.0415192	2.59723	0.0777651	3.04735	0.0415192	0.540625
putative acetyltransferase	COG0454	Transcription|General function prediction only	NP_388458.1	-	ydhI	-	622808	623290	483	CDS	1.94796	0.542401	0.215766	0.315877	1.60254	0.000125032	0.000653829	1.45639	0.315877	3.03678	0.000653829	2.07811
ABC transporter (ATP-binding protein) involved in the signalling pathway that activates KinA during	COG1132	Defense mechanisms	NP_388852.1	yes	yheI	+	1045318	1047075	1758	CDS	6.03085	-1.99937	3.76389e-06	2.43319e-05	1.60197	0.000139514	0.000719479	-3.99825	2.43319e-05	3.03558	0.000719479	55.2898
putative 4-hydroxyphenylacetate-3-hydroxylase	COG2368	Secondary metabolites biosynthesis, transport and catabolism	NP_389743.2	-	yoaI	+	2031439	2032890	1452	CDS	1.4659	1.13948	0.0221153	0.0492583	1.60036	0.00112639	0.00436623	2.20302	0.0492583	3.03218	0.00436623	1.28033
tRNA-Asp	undefined	undefined			trnB-Asp	-	3172512	3172588	77	tRNA	2.78291	-1.57315	0.000392264	0.00153357	1.59939	3.19028e-05	0.000203356	-2.97553	0.00153357	3.03015	0.000203356	5.27834
magnesium riboswitch	undefined	undefined			swmG	+	1395622	1395775	154	No_CDS	6.3409	-0.598937	0.0356052	0.0728975	1.59864	2.30857e-08	3.63091e-07	-1.5146	0.0728975	3.02858	3.63091e-07	52.4906
tRNA-Trp	undefined	undefined			trnD-Trp	+	952397	952470	74	tRNA	2.46165	-1.40977	0.00428223	0.0120401	1.59808	0.000248367	0.00119245	-2.65695	0.0120401	3.0274	0.00119245	4.41161
protease required for RsiW anti-sigma(W) degradation	COG2339	Signal transduction mechanisms	NP_390175.1	yes	prsW	-	2400208	2400864	657	CDS	7.40435	1.28691	1.79573e-05	9.98846e-05	1.59777	1.27038e-07	1.67145e-06	2.44005	9.98846e-05	3.02676	1.67145e-06	69.583
tRNA-Asn	undefined	undefined			trnS-Asn	+	528704	528778	75	tRNA	2.58032	-1.41627	0.00222829	0.0069507	1.59592	8.20929e-05	0.000457869	-2.66895	0.0069507	3.02288	0.000457869	4.60186
putative bacillithiol peroxidase	COG0386	Defense mechanisms|Lipid transport and metabolism	NP_390073.1	-	bsaA	-	2304553	2305035	483	CDS	3.78129	0.591417	0.0923524	0.160299	1.59441	4.55266e-06	3.73774e-05	1.50673	0.160299	3.0197	3.73774e-05	6.7601
putative lipoprotein	undefined	undefined	NP_391365.1	-	yvcA	-	3581965	3582690	726	CDS	4.54227	1.6829	0.00409053	0.0115821	1.59338	0.00652418	0.0192122	3.21072	0.0115821	3.01756	0.0192122	9.98372
iron-uptake protein	COG0609	Inorganic ion transport and metabolism	NP_388042.2	yes	feuC	-	180344	181354	1011	CDS	8.05214	-0.491743	0.186925	0.281898	1.58646	2.86305e-05	0.000185668	-1.40614	0.281898	3.00311	0.000185668	113.611
putative integral inner membrane protein	COG1284	Function unknown	NP_391408.1	yes	yvjA	-	3626128	3626973	846	CDS	5.86705	0.506872	0.118777	0.197881	1.58404	1.52332e-06	1.47134e-05	1.42097	0.197881	2.99809	1.47134e-05	30.6248
hypothetical protein	undefined	undefined	NP_388851.1	-	yheJ	+	1045037	1045198	162	CDS	3.60724	-0.0106012	0.985587	0.99114	1.58377	0.00735681	0.0212974	-1.00738	0.99114	2.99752	0.0212974	7.94737
ribosomal RNA-5S	undefined	undefined			rrnD-5S	+	951457	951572	116	rRNA	0.871076	-2.53414	0.00159266	0.00523449	1.58266	0.00656359	0.0193005	-5.79233	0.00523449	2.99521	0.0193005	1.38987
conserved hypothetical protein	undefined	undefined	NP_391426.1	-	comFB	-	3641811	3642107	297	CDS	1.60736	-0.290767	0.58365	0.683637	1.58087	0.00108923	0.00424624	-1.22329	0.683637	2.99151	0.00424624	1.95225
tRNA-Leu	undefined	undefined			trnD-Leu1	+	952859	952947	89	tRNA	3.33749	-0.286497	0.410563	0.526182	1.57609	1.92179e-06	1.77679e-05	-1.21967	0.526182	2.98161	1.77679e-05	6.93169
ATP-dependent deoxyribonuclease (subunit B)	COG3857	Replication, recombination and repair	NP_388943.2	-	addB	+	1136320	1139820	3501	CDS	7.97888	0.558719	0.0546733	0.104167	1.57515	1.05391e-07	1.42312e-06	1.47296	0.104167	2.97966	1.42312e-06	147.591
L-rhamnose isomerase	COG4806	Carbohydrate transport and metabolism			rhaA	-	3197933	3199207	1275	CDS	3.47074	-0.0628426	0.895897	0.929641	1.57376	0.000957312	0.00379321	-1.04452	0.929641	2.97679	0.00379321	6.56779
putative integral inner membrane protein	COG0398	Function unknown	NP_388929.1	yes	yhjE	+	1121550	1122173	624	CDS	6.24302	0.292518	0.319936	0.431309	1.57184	1.39084e-07	1.80108e-06	1.22478	0.431309	2.97283	1.80108e-06	47.6107
conserved hypothetical protein	COG3091	General function prediction only	NP_388360.1	-	ydcK	+	528129	528581	453	CDS	4.684	-0.235094	0.471434	0.582903	1.57112	1.26922e-06	1.26154e-05	-1.17698	0.582903	2.97136	1.26154e-05	17.9301
T-Box riboswitch specific of tyrosine tRNA ligase	undefined	undefined			tboY	-	3037895	3038168	274	No_CDS	10.171	5.3081	2.54455e-43	5.22268e-40	1.57057	2.0884e-06	1.90933e-05	39.6184	5.22268e-40	2.97021	1.90933e-05	60.2602
putative oxidoreductase	COG2130	Secondary metabolites biosynthesis, transport and catabolism|General function prediction only	NP_388626.1	1	yfmJ	-	817810	818829	1020	CDS	7.00686	1.80213	3.95019e-09	4.71382e-08	1.57016	2.67174e-07	3.16066e-06	3.48734	4.71382e-08	2.96938	3.16066e-06	43.2674
conserved hypothetical protein	COG4844	Function unknown		-	yuzB	-	3308368	3308604	237	CDS	7.09507	2.87475	1.15134e-18	6.05932e-17	1.56985	6.31449e-07	6.6635e-06	7.33478	6.05932e-17	2.96874	6.6635e-06	29.0694
short-chain flavodoxin	COG0716	Energy production and conversion	NP_389298.1	-	ykuN	+	1487038	1487514	477	CDS	8.64573	0.891851	0.00383812	0.0110024	1.56821	5.47371e-07	5.88209e-06	1.85556	0.0110024	2.96536	5.88209e-06	185.611
antiholin factor	COG1380	General function prediction only	NP_390769.1	yes	lrgA	-	2955209	2955649	441	CDS	6.26054	-0.321806	0.555756	0.659635	1.56652	0.00488756	0.0152574	-1.24989	0.659635	2.96189	0.0152574	48.5579
putative 3-oxoacyl-acyl-carrier protein reductase	COG1028	Lipid transport and metabolism|Secondary metabolites biosynthesis, transport and catabolism|General function prediction only	NP_390820.1	-	ytkK	-	3010661	3011428	768	CDS	7.27954	1.04289	0.000315823	0.00125992	1.56339	9.2812e-08	1.28281e-06	2.06035	0.00125992	2.95548	1.28281e-06	63.5285
inner membrane protein involved in activation of the KinB signaling pathway to sporulation	undefined	undefined	NP_388037.1	yes	kbaA	+	159182	159778	597	CDS	6.30128	-2.01768	5.36603e-06	3.33751e-05	1.56308	0.00029138	0.0013796	-4.04931	3.33751e-05	2.95485	0.0013796	61.8804
hypothetical protein, phage SPbeta	undefined	undefined	NP_389965.1	-	yopN	-	2208008	2208325	318	CDS	2.4388	-1.24191	0.018837	0.0429349	1.55806	0.00115271	0.00444301	-2.36512	0.0429349	2.94457	0.00444301	3.9714
uric acid permease	COG2233	Nucleotide transport and metabolism			pucK	+	3331857	3333149	1293	CDS	2.054	-0.898096	0.0558357	0.106114	1.55585	0.000128949	0.000670047	-1.8636	0.106114	2.94006	0.000670047	2.88045
putative DNA polymerase, phage SPbeta	COG0587	Replication, recombination and repair	NP_389916.1	-	yorL	-	2175596	2179513	3918	CDS	2.82788	0.25703	0.654772	0.744553	1.5519	0.00664478	0.0195113	1.19502	0.744553	2.93204	0.0195113	4.02551
conserved hypothetical protein	COG4768	Function unknown	NP_389733.1	yes	yoxC	+	2019421	2019726	306	CDS	4.71843	1.71714	0.00060726	0.00225593	1.5505	0.00194667	0.00699745	3.28783	0.00225593	2.92919	0.00699745	10.5756
malonyl-CoA-acyltransferase involved in polyketide synthesis	COG0331	Lipid transport and metabolism	NP_389591.1	-	pksC	+	1783763	1784629	867	CDS	3.79101	1.01537	0.0240943	0.053233	1.54959	0.000629941	0.00264679	2.02142	0.053233	2.92733	0.00264679	7.30926
citrate synthase II	COG0372	Energy production and conversion	NP_390792.1	-	citZ	-	2981151	2982269	1119	CDS	8.31195	0.706051	0.0355188	0.0728294	1.54784	5.8818e-06	4.66115e-05	1.63133	0.0728294	2.92378	4.66115e-05	187.959
putative formate/nitrite transporter	COG2116	Inorganic ion transport and metabolism	NP_390598.1	yes	yrhG	-	2779462	2780262	801	CDS	6.69631	-1.45991	5.86323e-05	0.00028619	1.54652	1.78473e-05	0.000122925	-2.75091	0.00028619	2.92111	0.000122925	85.2998
putative N-deacylase involved in arginine and ornithine utilization	COG4187	Amino acid transport and metabolism	NP_391657.1	-	rocB	-	3877192	3878892	1701	CDS	2.20714	-0.634149	0.150627	0.238735	1.54473	7.34783e-05	0.00041719	-1.55202	0.238735	2.9175	0.00041719	3.02292
FMN-containing NADPH-linked nitro/flavin reductase	COG0778	Energy production and conversion	NP_391690.1	-	nfrAA	-	3911477	3912226	750	CDS	7.90914	1.11322	0.000796325	0.00285744	1.54436	4.12207e-06	3.43925e-05	2.16328	0.00285744	2.91675	3.43925e-05	112.415
chaperonin small subunit	COG0234	Posttranslational modification, protein turnover, chaperones	NP_388483.2	-	groES	+	649903	650187	285	CDS	9.049	-0.981073	0.00258597	0.00788077	1.54193	2.80536e-06	2.44501e-05	-1.97393	0.00788077	2.91184	2.44501e-05	356.864
SdpC immunity factor	COG5658	Function unknown	NP_388738.1	yes	yfhL	+	929406	929738	333	CDS	5.82965	-0.867957	0.0852382	0.150885	1.53946	0.00245863	0.00856765	-1.82508	0.150885	2.90685	0.00856765	41.1055
cell wall hydrolase related to spore cortex-lytic enzymes	COG3773	Cell cycle control, cell division, chromosome partitioning|Cell wall/membrane/envelope biogenesis	NP_389265.1	-	ykvT	+	1448506	1449132	627	CDS	1.98505	2.72793	1.51157e-06	1.06583e-05	1.53678	0.00957484	0.02645	6.62504	1.06583e-05	2.90146	0.02645	1.14359
bacteriophage PBSX holin	undefined	undefined	NP_389163.1	yes	xhlB	+	1347013	1347276	264	CDS	2.52473	1.22842	0.00161369	0.00529512	1.5359	8.27899e-05	0.00046113	2.34311	0.00529512	2.89969	0.00046113	2.94823
glyceraldehyde-3-phosphate dehydrogenase	COG0057	Carbohydrate transport and metabolism	NP_390780.1	-	gapB	-	2967032	2968054	1023	CDS	4.14192	0.304252	0.420144	0.536118	1.535	4.95926e-05	0.000297628	1.23478	0.536118	2.89789	0.000297628	10.9325
putative methyltransferase, phage SPbeta	undefined	undefined	NP_389979.1	1	yopA	-	2215460	2216776	1317	CDS	5.24179	2.19633	3.17793e-11	5.45833e-10	1.53462	3.26508e-06	2.80401e-05	4.58312	5.45833e-10	2.89712	2.80401e-05	11.9507
biosynthesis of neotrehalosadiamine (3,3'-diamino-3,3'-dideoxy-alpha,	COG0399	Cell wall/membrane/envelope biogenesis	NP_388936.1	-	ntdA	-	1128286	1129611	1326	CDS	1.09356	1.748	0.00151947	0.00503829	1.53351	0.00752481	0.0216615	3.35892	0.00503829	2.89489	0.0216615	0.818365
arabinan-endo 1,5-alpha-L-arabinase	COG3507	Carbohydrate transport and metabolism	NP_390759.2	1	abnA	-	2949053	2950024	972	CDS	3.72066	1.90329	0.0767658	0.138151	1.5316	4.31008e-07	4.76896e-06	3.74064	0.138151	2.89106	4.76896e-06	0.640165
lytic exoenzyme associated with defective prophage PBSX	undefined	undefined	NP_389161.2	1	xepA	+	1345839	1346678	840	CDS	3.30352	1.35586	0.000396275	0.0015463	1.53133	6.78499e-05	0.000389953	2.5595	0.0015463	2.89052	0.000389953	4.93709
putative nitrogen-containing heterocycle degradation enzyme	COG1540	General function prediction only	NP_388287.3	-	ycsF	+	457023	457796	774	CDS	6.1611	-2.12048	1.35136e-06	9.66437e-06	1.52162	0.000335597	0.00154269	-4.34838	9.66437e-06	2.87113	0.00154269	60.4987
choline ABC transporter (permease)	COG1174	Amino acid transport and metabolism	NP_391250.1	yes	opuBD	-	3459806	3460486	681	CDS	2.9125	-0.973953	0.0192908	0.0438234	1.52058	6.52139e-05	0.000377046	-1.96421	0.0438234	2.86906	0.000377046	5.72738
putative permease	undefined	undefined	YP_003097734.1	yes	yozS	-	2037063	2037368	306	CDS	3.37348	-0.172497	0.619602	0.715333	1.51438	5.48109e-06	4.38594e-05	-1.12701	0.715333	2.85676	4.38594e-05	6.81759
tRNA-Ser	undefined	undefined			trnB-Ser2	-	3171976	3172066	91	tRNA	5.16181	-1.37044	1.13407e-05	6.49285e-05	1.50621	5.45644e-07	5.87892e-06	-2.58549	6.49285e-05	2.84062	5.87892e-06	29.1397
amidase hydrolyzing N-acetylmuramyl-L-Ala bond of MurNAc peptides	COG1680	Defense mechanisms	NP_388048.2	1	amiE	-	188408	189733	1326	CDS	3.59647	-0.743011	0.044893	0.0882763	1.50208	1.87641e-05	0.000127317	-1.67367	0.0882763	2.83251	0.000127317	8.14658
conserved hypothetical protein	COG1917	General function prediction only	NP_388301.1	-	ydaE	+	472585	473088	504	CDS	5.74404	0.682609	0.199593	0.29729	1.50156	0.00542106	0.0165823	1.60504	0.29729	2.83148	0.0165823	22.8992
HtrA-like serine protease	COG0265	Posttranslational modification, protein turnover, chaperones		1	htrB	-	3384070	3385446	1377	CDS	7.53613	1.2785	4.72921e-06	2.98209e-05	1.49584	1.01544e-07	1.3757e-06	2.42586	2.98209e-05	2.82028	1.3757e-06	86.0085
conserved hypothetical protein, putative PBSX prophage protein	undefined	undefined	NP_389156.1	-	xkdU	+	1342380	1342958	579	CDS	2.24822	1.40761	0.00158482	0.00521708	1.49202	0.000914482	0.0036517	2.65297	0.00521708	2.81283	0.0036517	2.25204
spore coat protein assembly factor CotR	COG3621	General function prediction only	NP_391333.1	-	cotR	+	3544642	3545604	963	CDS	1.50815	0.272552	0.613024	0.709663	1.49011	0.00355176	0.0116546	1.20794	0.709663	2.80911	0.0116546	1.63702
putative 2-cys peroxiredoxin	COG0450	Defense mechanisms	NP_389305.1	-	ykuU	+	1492261	1492803	543	CDS	4.52211	0.46382	0.211706	0.311042	1.48867	6.86873e-05	0.000392158	1.37919	0.311042	2.80631	0.000392158	13.9926
putative serine/threonine-protein kinase	COG2112	Signal transduction mechanisms	NP_390656.2	-	yrzF	+	2840110	2840757	648	CDS	7.03414	3.9739	1.52328e-32	3.90816e-30	1.48787	2.02293e-06	1.8536e-05	15.7132	3.90816e-30	2.80475	1.8536e-05	17.8054
ribosome maturation factor	COG0779	Translation, ribosomal structure and biogenesis	NP_389541.1	-	rimP	+	1731776	1732246	471	CDS	8.22357	0.0340945	0.917879	0.944062	1.4877	1.02386e-05	7.58651e-05	1.02391	0.944062	2.80441	7.58651e-05	213.332
hypothetical protein	undefined	undefined	NP_388890.1	-	yhgB	-	1082870	1083184	315	CDS	1.98647	-0.586873	0.315939	0.427043	1.48565	0.0060542	0.0180877	-1.50199	0.427043	2.80043	0.0180877	2.24602
enoyl-CoA hydratase / 3-hydroxyacyl-CoA dehydrogenase	COG1024	Lipid transport and metabolism			fadN	-	3370025	3372394	2370	CDS	4.41416	0.988433	0.00819637	0.0207692	1.48396	8.13831e-05	0.000454527	1.98403	0.0207692	2.79716	0.000454527	8.70854
hypothetical protein, phage SPbeta	undefined	undefined	NP_389974.1	yes	yopE	-	2212245	2212496	252	CDS	0.741235	-0.880992	0.226908	0.328441	1.48032	0.0143539	0.0367807	-1.84164	0.328441	2.7901	0.0367807	0.907318
putative methylcrotonoyl-CoA carboxylase	COG4799	Lipid transport and metabolism	NP_389703.2	-	yngE	-	1949682	1951217	1536	CDS	2.49829	2.62853	2.34263e-10	3.53548e-09	1.47838	0.00140108	0.00524767	6.18397	3.53548e-09	2.78635	0.00524767	1.32209
putative N-deacylase	COG4187	Amino acid transport and metabolism	NP_390262.2	-	yqjN	-	2474028	2475671	1644	CDS	5.26629	0.565126	0.0813623	0.144899	1.46657	7.38983e-06	5.68076e-05	1.47952	0.144899	2.76365	5.68076e-05	21.3545
putative thiol management oxidoreductase component	COG2761	Posttranslational modification, protein turnover, chaperones	NP_389037.2	-	yjbH	-	1233614	1234513	900	CDS	7.00868	1.70771	2.21552e-08	2.31418e-07	1.46536	1.42801e-06	1.39239e-05	3.26642	2.31418e-07	2.76133	1.39239e-05	55.3062
transcriptional regulator sensing organic peroxides	COG1846	Transcription	NP_389198.1	-	ohrR	-	1381434	1381877	444	CDS	5.39007	1.57957	3.58386e-06	2.32413e-05	1.46498	1.82237e-05	0.000124681	2.98881	2.32413e-05	2.7606	0.000124681	16.8256
putative efflux transporter	COG2814	Carbohydrate transport and metabolism	NP_391655.1	yes	ywfA	-	3874332	3875570	1239	CDS	1.37903	0.731168	0.169322	0.261107	1.46478	0.00428345	0.0136096	1.65998	0.261107	2.76021	0.0136096	1.19138
putative NAD-disulfide oxidoreductase	COG1252	Energy production and conversion			yumB	-	3300034	3301254	1221	CDS	5.73532	0.65733	0.0296135	0.062856	1.46319	1.60953e-06	1.54012e-05	1.57716	0.062856	2.75717	1.54012e-05	26.2594
thiamine transporter, permease component	COG4721	Coenzyme transport and metabolism	NP_389206.2	yes	thiV	-	1390439	1391038	600	CDS	3.13928	2.63564	1.16659e-11	2.1669e-10	1.46304	0.000357708	0.00162974	6.21449	2.1669e-10	2.75689	0.00162974	2.48229
putative factor for cell wall maintenance or synthesis	COG2720	Defense mechanisms	NP_389753.1	-	yoaR	-	2041928	2042839	912	CDS	0.150163	0.223579	0.785032	0.848488	1.46123	0.0559141	0.111747	1.16763	0.848488	2.75343	0.111747	0.503428
plipastatin synthetase	COG1020	Secondary metabolites biosynthesis, transport and catabolism	NP_389714.1	-	ppsC	-	1974881	1982548	7668	CDS	4.24085	-0.22035	0.541883	0.646825	1.45961	4.45995e-05	0.000271634	-1.16502	0.646825	2.75033	0.000271634	12.9866
spore coat protein (inner coat)	undefined	undefined	NP_389091.1	-	cotT	-	1280626	1280874	249	CDS	0.94773	-1.07352	0.0842975	0.149349	1.4557	0.00340772	0.0112994	-2.10456	0.149349	2.74289	0.0112994	1.25945
phosphotransferase system (PTS) fructose-specific enzyme IID component	COG3716	Carbohydrate transport and metabolism	NP_390582.1	yes	levG	-	2760233	2761060	828	CDS	3.3093	1.29618	0.00963414	0.0238606	1.45492	0.00400877	0.0128262	2.45578	0.0238606	2.74141	0.0128262	3.91848
putative factor	COG3557	Function unknown	NP_388748.3	-	ygaC	+	938731	939261	531	CDS	7.05044	1.57225	2.62427e-07	2.23963e-06	1.44999	1.99027e-06	1.83597e-05	2.97368	2.23963e-06	2.73205	1.83597e-05	54.958
thiamine pyrophosphate riboswitch	undefined	undefined			tswE	+	1607367	1607468	102	No_CDS	3.43111	1.17058	0.00328043	0.00960497	1.44941	0.000300608	0.00141676	2.25102	0.00960497	2.73097	0.00141676	5.17366
extracellular serine protease	COG1404	Posttranslational modification, protein turnover, chaperones	NP_391688.1	1	vpr	+	3907844	3910264	2421	CDS	3.36109	1.69149	0.000126042	0.000565468	1.44916	0.0011745	0.00451436	3.22991	0.000565468	2.7305	0.00451436	4.4022
conserved hypothetical protein	undefined	undefined	NP_389832.1	yes	yojB	-	2124529	2124765	237	CDS	0.781299	-0.582005	0.420671	0.536623	1.44276	0.0221949	0.0528175	-1.49693	0.536623	2.71841	0.0528175	0.938783
factor required for KinB signal transduction and activation of the phosphorelay to sporulation	undefined	undefined			kapB	+	3231399	3231785	387	CDS	5.31853	-1.14111	0.00112266	0.00386298	1.44239	2.73287e-05	0.00017859	-2.20551	0.00386298	2.71771	0.00017859	31.3474
choline ABC transporter (ATP-binding protein)	COG0517	Signal transduction mechanisms	NP_391253.1	-	opuBA	-	3462105	3463250	1146	CDS	2.86974	-0.978864	0.0370203	0.0754185	1.43977	0.00111829	0.00433893	-1.97091	0.0754185	2.71278	0.00433893	5.81868
putative efflux transporter	COG2211	Carbohydrate transport and metabolism	NP_390254.2	yes	yqjV	+	2466721	2467953	1233	CDS	4.24706	-1.11027	0.00131107	0.00441867	1.43953	1.25516e-05	9.08715e-05	-2.15886	0.00441867	2.71233	9.08715e-05	15.1874
tRNA-Gly	undefined	undefined			trnI-Gly	+	165959	166033	75	tRNA	2.28797	-2.72276	2.73751e-08	2.8306e-07	1.4365	5.65955e-05	0.000332843	-6.60133	2.8306e-07	2.70663	0.000332843	4.46086
putative enzyme with DAC domain	COG1624	Signal transduction mechanisms	NP_389825.3	-	yojJ	-	2118504	2119127	624	CDS	3.30007	1.18931	0.0099229	0.0245087	1.43593	0.00201049	0.0071828	2.28043	0.0245087	2.70556	0.0071828	4.52864
positive regulator of hxlAB expression	COG1733	Transcription	NP_388229.2	-	hxlR	+	376032	376394	363	CDS	3.90453	0.306046	0.339371	0.452682	1.43473	5.60288e-06	4.46599e-05	1.23631	0.452682	2.70331	4.46599e-05	9.27812
protein of immunity to sublancin	undefined	undefined	NP_390032.1	1	sunI	-	2269988	2270305	318	CDS	5.64919	0.461451	0.169431	0.261176	1.43392	2.37968e-05	0.000157813	1.37693	0.261176	2.70179	0.000157813	29.6819
multidrug-efflux transporter	COG2814	Carbohydrate transport and metabolism	NP_390281.2	yes	bmr	+	2494656	2495825	1170	CDS	8.53446	0.965795	0.00594365	0.0158536	1.43303	5.3514e-05	0.000318328	1.95314	0.0158536	2.70012	0.000318328	174.457
conserved hypothetical protein, phage SPbeta	undefined	undefined	NP_390004.1	-	yomV	+	2239586	2240296	711	CDS	2.95043	1.58108	0.0116015	0.0281221	1.43174	0.02327	0.0548354	2.99194	0.0281221	2.69771	0.0548354	1.94108
spore coat associated protein, similar to YheD	COG0189	Coenzyme transport and metabolism|Translation, ribosomal structure and biogenesis	NP_388859.1	-	yheC	-	1052162	1053253	1092	CDS	1.80414	2.9225	6.1987e-07	4.8934e-06	1.42917	0.0261668	0.0603453	7.58157	4.8934e-06	2.69292	0.0603453	0.776901
alkaline phosphatase A	COG1785	Inorganic ion transport and metabolism|General function prediction only	NP_388822.2	1	phoA	-	1017083	1018468	1386	CDS	4.21328	3.33053	5.41113e-14	1.49079e-12	1.42687	0.00115378	0.00444301	10.0598	1.49079e-12	2.68864	0.00444301	4.0727
putative oxidoreductase	undefined	undefined	NP_391595.1	-	ywjG	+	3810090	3810611	522	CDS	6.57671	-1.24872	0.000710027	0.00259312	1.42606	0.000103807	0.000558487	-2.3763	0.00259312	2.68712	0.000558487	85.8794
conserved hypothetical protein	undefined	undefined	NP_391539.1	yes	ywnF	-	3761987	3762421	435	CDS	5.12051	0.943833	0.00195768	0.00621042	1.42545	3.39822e-06	2.88814e-05	1.92363	0.00621042	2.68598	2.88814e-05	18.0878
conserved hypothetical protein	COG2261	General function prediction only	NP_388318.1	yes	ydaS	-	492654	492911	258	CDS	6.63965	0.177787	0.739368	0.812955	1.42321	0.0088455	0.0248194	1.13115	0.812955	2.68182	0.0248194	52.7585
type I signal peptidase	COG0681	Intracellular trafficking, secretion, and vesicular transport	NP_389324.1	1	sipT	+	1511308	1511889	582	CDS	6.84639	-0.288533	0.338508	0.452041	1.41826	3.32785e-06	2.846e-05	-1.2214	0.452041	2.67262	2.846e-05	86.4044
putative NADH-dependent flavin oxidoreductase	COG1902	Energy production and conversion	NP_390301.1	-	yqiG	+	2516440	2517558	1119	CDS	7.18506	0.934073	0.0064174	0.0169302	1.41469	4.36606e-05	0.000266707	1.91066	0.0169302	2.66603	0.000266707	77.9263
transcriptional regulator	COG4463	Transcription	NP_387964.1	-	ctsR	+	101449	101913	465	CDS	7.02586	1.0162	0.00504969	0.0138193	1.4133	0.000110343	0.000585626	2.02258	0.0138193	2.66345	0.000585626	69.3628
tRNA-Phe	undefined	undefined			trnB-Phe	-	3172424	3172499	76	tRNA	1.58408	-2.1259	0.000139855	0.000619314	1.41218	0.000613121	0.00259203	-4.36474	0.000619314	2.66139	0.00259203	2.46141
N-formyl-4-amino-5-aminomethyl-2- methylpyrimidinedeformylase	COG0624	Amino acid transport and metabolism	NP_389418.2	-	thiQ	+	1607556	1608836	1281	CDS	3.7049	3.05817	1.31356e-17	5.92546e-16	1.40667	0.000271197	0.00129149	8.32916	5.92546e-16	2.65124	0.00129149	2.55639
hypothetical protein	undefined	undefined	NP_388795.1	1	yhcM	-	988417	988872	456	CDS	4.30844	0.741826	0.114203	0.192132	1.40599	0.00302266	0.0102376	1.67229	0.192132	2.64999	0.0102376	11.4558
putative PEP-dependent enzyme	COG0574	Carbohydrate transport and metabolism	NP_389764.1	-	pps	-	2051329	2053929	2601	CDS	5.65748	0.217564	0.514351	0.622468	1.40532	3.08509e-05	0.00019788	1.16277	0.622468	2.64876	0.00019788	35.1498
tRNA-Arg	undefined	undefined			trnQ-Arg	-	3545889	3545964	76	tRNA	4.57467	-0.625564	0.136641	0.222849	1.40454	0.000790318	0.00320896	-1.54281	0.222849	2.64734	0.00320896	19.1259
putative integral inner membrane protein	undefined	undefined	NP_389221.1	yes	ykoS	+	1401772	1403466	1695	CDS	2.01882	1.3588	0.0016259	0.00532243	1.40362	0.00148013	0.00552359	2.56472	0.00532243	2.64564	0.00552359	1.68481
hypothetical protein	undefined	undefined	NP_390215.1	yes	ypuB	-	2434143	2434346	204	CDS	0.226198	1.10628	0.16642	0.257989	1.40044	0.079609	0.147537	2.1529	0.257989	2.63982	0.147537	0.435354
putative base plate assembly protein, putative PBSX prophage protein	COG3299	Mobilome: prophages, transposons	NP_389155.1	-	xkdT	+	1341350	1342396	1047	CDS	3.20271	1.34416	0.000859797	0.00306643	1.40038	0.000560679	0.00241257	2.53882	0.00306643	2.63971	0.00241257	4.59525
conserved hypothetical protein	COG4466	Function unknown	NP_387925.1	-	veg	+	52763	53023	261	CDS	10.3842	-0.100936	0.780358	0.844542	1.3943	0.000155304	0.000789993	-1.07247	0.844542	2.62862	0.000789993	900.884
thiamine binding protein	undefined	undefined	NP_389207.1	-	thiU	-	1391040	1391642	603	CDS	4.36657	2.73672	5.65452e-15	1.84221e-13	1.39299	8.75812e-05	0.000486496	6.66553	1.84221e-13	2.62623	0.000486496	5.83044
glucose uptake protein	COG4975	Carbohydrate transport and metabolism	NP_388274.1	yes	glcU	+	444461	445324	864	CDS	0.07378	-0.146372	0.889764	0.925616	1.39041	0.123363	0.210246	-1.10678	0.925616	2.62153	0.210246	0.267447
general stress protein 18	COG0693	General function prediction only	NP_388666.1	-	yfkM	+	859745	860263	519	CDS	8.17768	0.519695	0.348624	0.463118	1.38849	0.0136786	0.0353149	1.43365	0.463118	2.61804	0.0353149	151.038
hypothetical protein	undefined	undefined	NP_388922.1	-	yhzC	-	1116583	1116816	234	CDS	5.03738	2.04949	8.45424e-10	1.16069e-08	1.38566	3.17766e-05	0.000202866	4.13959	1.16069e-08	2.61291	0.000202866	13.3244
activator of protein kinase McsB	COG3880	Posttranslational modification, protein turnover, chaperones	NP_387965.1	-	mcsA	+	101927	102484	558	CDS	6.53294	0.756309	0.0279247	0.059797	1.38307	6.96272e-05	0.000396421	1.68916	0.059797	2.60822	0.000396421	51.3327
peptide methionine R-sulfoxide reductase	COG0229	Posttranslational modification, protein turnover, chaperones	NP_390051.1	-	msrB	-	2287097	2287528	432	CDS	6.29026	2.59617	3.67046e-19	2.12215e-17	1.38077	1.23313e-06	1.22864e-05	6.04678	2.12215e-17	2.60407	1.22864e-05	22.4804
replication terminator protein	undefined	undefined	NP_389731.1	-	rtp	-	2017886	2018254	369	CDS	2.24181	1.39994	0.0207412	0.0467047	1.38001	0.0234024	0.0550799	2.63891	0.0467047	2.60271	0.0550799	2.25631
siderophore 2,3-dihydroxybenzoate-glycine-threonine trimeric ester	COG1020	Secondary metabolites biosynthesis, transport and catabolism			dhbF	-	3280519	3287655	7137	CDS	11.6363	-0.483884	0.165234	0.256693	1.37783	0.00010023	0.000542087	-1.3985	0.256693	2.59877	0.000542087	1716.15
putative exported protein	undefined	undefined	NP_388927.1	yes	yhjC	-	1120628	1120828	201	CDS	0.687753	-0.45617	0.458694	0.570934	1.37743	0.00980378	0.0269555	-1.3719	0.570934	2.59805	0.0269555	1.07066
hypothetical protein	undefined	undefined	YP_003097679.1	-	yczO	-	455771	455935	165	CDS	5.794	1.84158	5.28102e-05	0.000261503	1.37571	0.00230743	0.00813745	3.58403	0.000261503	2.59496	0.00813745	20.7715
putative aminoacid related metabolite efflux transporter	COG1279	Amino acid transport and metabolism	NP_388967.1	yes	yisU	-	1166008	1166670	663	CDS	1.24042	-0.62491	0.232693	0.335395	1.37533	0.00183001	0.00665084	-1.54211	0.335395	2.59428	0.00665084	1.56439
putative indole acetic acid acetyltransferase	COG0454	Transcription|General function prediction only	NP_390711.1	-	ysnE	+	2898292	2898747	456	CDS	2.38992	0.889022	0.0211047	0.0473673	1.37486	0.000322622	0.00149839	1.85192	0.0473673	2.59343	0.00149839	2.57095
putative tartrate dehydrogenase	COG0473	Energy production and conversion|Amino acid transport and metabolism	NP_388282.3	-	ycsA	+	452830	453894	1065	CDS	7.93713	-1.63436	2.71785e-06	1.81117e-05	1.37355	6.51164e-05	0.000377014	-3.10451	1.81117e-05	2.59107	0.000377014	177.644
integral inner membrane protein regulating antibiotic production	COG2364	Function unknown	NP_388240.2	yes	yczE	-	408240	408887	648	CDS	7.2852	-0.0725353	0.803625	0.860429	1.37317	3.41638e-06	2.89757e-05	-1.05156	0.860429	2.59039	2.89757e-05	104.151
putative bacteriocin	undefined	undefined	-	1	yufS	-	3246152	3246367	216	CDS	0.33249	2.22611	0.00245375	0.0075225	1.3724	0.0951846	0.171299	4.6787	0.0075225	2.58901	0.171299	0.314936
conserved hypothetical protein	undefined	undefined	NP_390358.1	yes	yqgY	+	2564638	2564883	246	CDS	7.10046	0.675173	0.0441791	0.0871481	1.36947	5.46531e-05	0.000323739	1.59679	0.0871481	2.58376	0.000323739	63.9401
small multidrug efflux transporter	COG2076	Defense mechanisms	NP_389611.1	yes	ebrB	-	1864691	1865044	354	CDS	4.02264	1.40281	0.000407954	0.00158434	1.36553	0.00061654	0.00260113	2.64416	0.00158434	2.57671	0.00260113	7.73578
methylglyoxal synthase	COG1803	Carbohydrate transport and metabolism	NP_390129.1	-	mgsA	-	2358911	2359324	414	CDS	6.01279	0.0150568	0.961944	0.9764	1.36508	1.81305e-05	0.00012425	1.01049	0.9764	2.57591	0.00012425	42.4874
putative alkanal monooxygenase	COG2141	Coenzyme transport and metabolism|General function prediction only	NP_391278.1	-	yvbT	-	3486807	3487817	1011	CDS	6.74403	0.716781	0.0192515	0.0437583	1.36433	1.04619e-05	7.71025e-05	1.64351	0.0437583	2.57457	7.71025e-05	55.2047
hypothetical protein, phage SPbeta	undefined	undefined	NP_389973.1	-	yopF	-	2212026	2212241	216	CDS	0.824899	-0.202532	0.730782	0.807499	1.36304	0.00986284	0.0270816	-1.15072	0.807499	2.57227	0.0270816	1.12874
methionine aminopeptidase B	COG0024	Translation, ribosomal structure and biogenesis	NP_388650.1	-	mapB	-	839735	840484	750	CDS	7.04384	-0.184642	0.518201	0.625652	1.36091	2.50973e-06	2.223e-05	-1.13654	0.625652	2.56847	2.223e-05	91.7951
putative hydrolase	COG1752	General function prediction only	NP_389387.1	-	ylbK	+	1571981	1572763	783	CDS	6.05469	0.301839	0.304036	0.415192	1.35973	4.49059e-06	3.69416e-05	1.23271	0.415192	2.56638	3.69416e-05	39.9321
conserved hypothetical protein	undefined	undefined	NP_389096.1	yes	yjgA	-	1284371	1284769	399	CDS	5.01512	0.163297	0.615083	0.711444	1.35953	3.0395e-05	0.000195261	1.11984	0.711444	2.56601	0.000195261	23.4756
biotin carboxylase/methylcrotonoyl-CoA carboxylase subunit	COG0439	Lipid transport and metabolism	NP_389706.1	-	yngHA	-	1953181	1954515	1335	CDS	0.0876173	0.850483	0.315384	0.426538	1.3592	0.0987917	0.176552	1.8031	0.426538	2.56543	0.176552	0.346107
putative transporter	undefined	undefined	NP_388889.1	yes	yhfA	-	1081413	1082804	1392	CDS	2.86285	-0.958614	0.0868858	0.153273	1.35859	0.0110111	0.0296591	-1.94344	0.153273	2.56435	0.0296591	5.02236
putative adenylylsulfate kinase	COG0529	Inorganic ion transport and metabolism	NP_388972.1	-	yisZ	-	1169877	1170476	600	CDS	0.206811	1.39339	0.0665783	0.122613	1.35337	0.0832943	0.153123	2.62696	0.122613	2.55508	0.153123	0.383304
ATP-dependent Clp protease proteolytic subunit	COG0740	Posttranslational modification, protein turnover, chaperones	NP_391334.1	1	clpP	+	3546234	3546827	594	CDS	10.0435	-0.598307	0.0543956	0.103954	1.35315	1.76217e-05	0.000121985	-1.51394	0.103954	2.55469	0.000121985	842.466
small peptidoglycan-associated lipoprotein	undefined	undefined	NP_389345.1	1	slp	-	1533327	1533701	375	CDS	2.98391	4.47473	6.53446e-18	3.01393e-16	1.34977	0.0224217	0.0532644	22.2345	3.01393e-16	2.54872	0.0532644	0.855561
forespore protein required for alternative engulfment	COG0739	Cell wall/membrane/envelope biogenesis	NP_391536.1	1	spoIIQ	-	3759702	3760553	852	CDS	2.57505	-0.640722	0.137422	0.223501	1.3482	0.000723852	0.00298035	-1.55911	0.223501	2.54593	0.00298035	4.2412
hypothetical protein, phage SPbeta	undefined	undefined	YP_003097751.1	-	youA	+	2241154	2241765	612	CDS	2.38074	0.527729	0.434357	0.548428	1.34562	0.0441579	0.0922484	1.44166	0.548428	2.54139	0.0922484	1.8361
putative hydrolase	COG1073	Signal transduction mechanisms	NP_390245.1	1	yqkD	+	2460664	2461581	918	CDS	4.47685	1.60477	1.05089e-06	7.74952e-06	1.34482	4.98224e-05	0.000298571	3.04148	7.74952e-06	2.53999	0.000298571	8.65766
tRNA-Asp	undefined	undefined			trnD-Asp	+	952042	952118	77	tRNA	2.24036	-1.43582	0.00137605	0.0046225	1.34331	0.000408168	0.00184327	-2.70537	0.0046225	2.53733	0.00184327	3.99404
putative integral inner membrane protein	COG1284	Function unknown	NP_390132.2	yes	ypjC	+	2360630	2361502	873	CDS	5.9872	-0.255839	0.37132	0.486675	1.34232	2.85867e-06	2.4862e-05	-1.19403	0.486675	2.53558	2.4862e-05	40.91
nitrate reductase (alpha subunit)	COG5013	Energy production and conversion|Inorganic ion transport and metabolism	NP_391609.2	-	narG	-	3826259	3829945	3687	CDS	4.60444	-2.58186	1.90055e-07	1.67061e-06	1.34088	0.00351505	0.0115712	-5.98711	1.67061e-06	2.53306	0.0115712	24.4152
lysine riboswitch	undefined	undefined			kswB	-	3421169	3421348	180	No_CDS	6.47112	-0.0584864	0.847384	0.8956	1.34053	1.26851e-05	9.1355e-05	-1.04137	0.8956	2.53244	9.1355e-05	63.5186
conserved hypothetical protein, PBSX phage protein	undefined	undefined	NP_389160.1	-	xkdX	+	1345631	1345795	165	CDS	1.03545	1.5162	0.0104421	0.0256368	1.33699	0.0287269	0.0651154	2.86037	0.0256368	2.52623	0.0651154	0.787487
glycolate oxidase subunit	COG0277	Energy production and conversion	NP_390746.1	-	glcD	+	2933185	2934597	1413	CDS	8.30887	1.99821	2.11891e-05	0.000116285	1.33474	0.00381915	0.0123543	3.99504	0.000116285	2.52229	0.0123543	105.274
Undecaprenyl-diphosphatase	COG1968	Lipid transport and metabolism			uppP	-	3194635	3195465	831	CDS	7.48544	0.78806	0.00409111	0.0115821	1.33171	1.55544e-06	1.49787e-05	1.72675	0.0115821	2.517	1.49787e-05	97.2754
glyoxal/methylglyoxal reductase	COG0656	Secondary metabolites biosynthesis, transport and catabolism	NP_391220.1	-	yvgN	-	3426749	3427579	831	CDS	8.6786	0.150522	0.599945	0.698066	1.3302	5.0107e-06	4.06501e-05	1.10997	0.698066	2.51438	4.06501e-05	239.911
cysteine synthase	COG0031	Amino acid transport and metabolism	NP_387954.1	-	cysK	+	81771	82697	927	CDS	8.05045	0.306321	0.540595	0.645475	1.32588	0.00911277	0.0254746	1.23655	0.645475	2.50686	0.0254746	171.322
hypothetical protein	undefined	undefined	NP_391687.2	-	ywcI	-	3907012	3907314	303	CDS	0.175996	-5.22473	2.25173e-05	0.000123245	1.32471	0.0207269	0.0501378	-37.3939	0.000123245	2.50483	0.0501378	0.834683
N-acetylglucosamine-6-phosphate deacetylase	COG1820	Carbohydrate transport and metabolism	NP_391381.1	-	nagA	+	3595356	3596546	1191	CDS	6.6973	-0.477981	0.115211	0.193194	1.32404	1.47608e-05	0.000103755	-1.39279	0.193194	2.50366	0.000103755	78.1124
cysteine desulfurase involved in tRNA thiolation	COG1104	Amino acid transport and metabolism	NP_390629.2	-	iscSA	-	2810559	2811698	1140	CDS	8.96139	1.66143	2.06579e-08	2.19123e-07	1.32065	7.01017e-06	5.45014e-05	3.16331	2.19123e-07	2.49778	5.45014e-05	219.257
conserved hypothetical protein, putative PBSX prophage protein	undefined	undefined	NP_389153.1	-	xkdR	+	1340609	1340875	267	CDS	1.67974	1.77562	0.000389247	0.00152322	1.31943	0.0115041	0.0306707	3.42384	0.00152322	2.49568	0.0306707	1.35326
putative carbonic anhydrase	COG0288	Inorganic ion transport and metabolism	NP_391347.1	-	yvdA	-	3561590	3562183	594	CDS	4.17778	-0.477383	0.154289	0.243293	1.31496	6.31976e-05	0.000367981	-1.39222	0.243293	2.48796	0.000367981	14.5422
acetoin dehydrogenase E1 component (TPP-dependent beta subunit)	COG0022	Energy production and conversion	NP_388688.1	-	acoB	+	880007	881035	1029	CDS	1.27559	-0.0441135	0.944664	0.964159	1.31483	0.0272127	0.0623372	-1.03105	0.964159	2.48772	0.0623372	1.02949
hypothetical protein	undefined	undefined	YP_003097706.1	-	yjzE	+	1256109	1256363	255	CDS	8.02883	0.828612	0.00687419	0.0179279	1.31289	2.21665e-05	0.000147477	1.77598	0.0179279	2.48439	0.000147477	158.166
type I signal peptidase	COG0681	Intracellular trafficking, secretion, and vesicular transport	NP_388930.1	1	sipV	+	1122175	1122681	507	CDS	6.3702	0.624668	0.0242874	0.0535732	1.31182	2.79383e-06	2.44014e-05	1.54186	0.0535732	2.48255	2.44014e-05	52.1195
putative H+/anion permease	COG2610	Carbohydrate transport and metabolism|General function prediction only	NP_389833.1	yes	yojA	-	2124850	2126184	1335	CDS	1.97762	-1.0081	0.0440274	0.0868906	1.31152	0.0031997	0.0107153	-2.01126	0.0868906	2.48203	0.0107153	2.93308
putative dipeptidase	COG0624	Amino acid transport and metabolism		-	ytjP	-	3067420	3068811	1392	CDS	8.72995	1.06675	0.000348884	0.00137974	1.30716	1.31449e-05	9.40069e-05	2.0947	0.00137974	2.47455	9.40069e-05	206.099
tRNA-Val	undefined	undefined			trnB-Val	-	3173722	3173797	76	tRNA	2.23489	-1.75248	0.00384372	0.0110108	1.30696	0.0171276	0.0426632	-3.36937	0.0110108	2.47419	0.0426632	4.51542
hypothetical protein, phage SPbeta	undefined	undefined	NP_390006.1	-	yomT	+	2241765	2241992	228	CDS	0.423894	1.1475	0.257673	0.364741	1.30656	0.202207	0.309609	2.21529	0.364741	2.47351	0.309609	0.294057
putative Na+/anion cotransporter	COG1283	Inorganic ion transport and metabolism	NP_390420.2	yes	yqeW	+	2620717	2621640	924	CDS	1.61283	0.437591	0.377051	0.492771	1.30646	0.00614727	0.0183391	1.35434	0.492771	2.47334	0.0183391	1.70083
putative oxidoreductase	COG1028	Lipid transport and metabolism|Secondary metabolites biosynthesis, transport and catabolism|General function prediction only	NP_388924.1	-	yhxD	-	1117734	1118633	900	CDS	4.60462	-0.508121	0.275411	0.384022	1.30556	0.00515206	0.0158778	-1.4222	0.384022	2.4718	0.0158778	20.487
putative metal-dependent phosphohydrolase	undefined	undefined		-	yueE	-	3264678	3265208	531	CDS	6.00229	1.44121	0.000166708	0.000721873	1.30436	0.000650981	0.00272126	2.71548	0.000721873	2.46975	0.00272126	32.3341
secreted inhibitor of the activity of phosphatase RapA	undefined	undefined	NP_389126.1	1	phrA	+	1316995	1317129	135	CDS	1.73144	-1.09098	0.0449393	0.0883082	1.30308	0.00678638	0.0198986	-2.13019	0.0883082	2.46754	0.0198986	2.5189
putative bifunctional P-450/NADPH-P450 reductase 1	COG0369	Inorganic ion transport and metabolism	NP_388606.1	-	cypD	+	792682	795867	3186	CDS	4.55186	0.264826	0.565756	0.66933	1.30215	0.00502796	0.0156163	1.20149	0.66933	2.46597	0.0156163	13.0341
putative long-chain fatty-acid-CoA ligase	COG0318	Lipid transport and metabolism|Secondary metabolites biosynthesis, transport and catabolism	NP_388917.1	yes	yhfT	-	1110479	1111918	1440	CDS	4.91927	-0.583453	0.0585083	0.110274	1.30005	1.90408e-05	0.000128769	-1.49843	0.110274	2.46238	0.000128769	23.8803
2-methylcitrate synthase/citrate synthase III	COG0372	Energy production and conversion	NP_390294.1	1	mmgD	-	2509654	2510772	1119	CDS	1.03948	0.911958	0.0822262	0.146247	1.29784	0.0127189	0.0331981	1.8816	0.146247	2.45861	0.0331981	0.975979
putative membrane component involved in subtilosin production	undefined	undefined	NP_391618.1	yes	albB	+	3837682	3837843	162	CDS	1.82684	-0.228406	0.598214	0.696248	1.29291	0.000963944	0.0038158	-1.17154	0.696248	2.45021	0.0038158	2.36187
putative transcriptional regulator (LysR family)	COG0583	Transcription	NP_389757.1	-	yoaU	-	2044956	2045828	873	CDS	1.54648	0.644265	0.219028	0.319173	1.29248	0.0123649	0.0325371	1.56294	0.319173	2.44949	0.0325371	1.58673
fructuronate reductase	COG1028	Lipid transport and metabolism|Secondary metabolites biosynthesis, transport and catabolism|General function prediction only	NP_389117.1	-	uxuB	+	1306562	1307398	837	CDS	1.2081	0.521577	0.382167	0.497873	1.28983	0.0257472	0.0596457	1.43552	0.497873	2.445	0.0596457	0.950834
putative permease	COG0701	Function unknown	NP_388207.1	yes	ycgR	-	350858	351742	885	CDS	6.46264	1.77393	8.60136e-07	6.49055e-06	1.28923	0.000308064	0.00144361	3.41984	6.49055e-06	2.44398	0.00144361	39.4952
1-hydroxy-2-methyl-2-(E)-butenyl 4-diphosphate reductase	COG0761	Lipid transport and metabolism	NP_390395.2	-	ispH	+	2596535	2597479	945	CDS	7.51464	1.28595	2.00397e-05	0.000110272	1.28891	1.96063e-05	0.000132375	2.43842	0.000110272	2.44343	0.000132375	91.2189
putative sulfur transferase	COG0607	Inorganic ion transport and metabolism			ytwF	-	3102201	3102512	312	CDS	6.65145	0.906672	0.00298704	0.00892416	1.28868	2.80119e-05	0.000182233	1.87472	0.00892416	2.44304	0.000182233	54.2702
putative enzyme with pyruvate as substrate	COG0028	Amino acid transport and metabolism|Coenzyme transport and metabolism	NP_388315.1	-	ydaP	+	488830	490554	1725	CDS	8.41811	0.705019	0.167103	0.258821	1.28753	0.012573	0.0329226	1.63017	0.258821	2.44109	0.0329226	182.291
metalloregulation DNA-binding stress protein	COG0783	Inorganic ion transport and metabolism|Defense mechanisms			mrgA	+	3383565	3384026	462	CDS	7.10958	-0.533164	0.125099	0.20732	1.2874	0.000243516	0.00117053	-1.4471	0.20732	2.44088	0.00117053	119.391
tRNA-Arg	undefined	undefined			trnSL-Arg2	-	2899816	2899889	74	tRNA	1.0758	0.364963	0.517712	0.625245	1.28411	0.0162193	0.0408969	1.28785	0.625245	2.43531	0.0408969	1.17506
oligopeptide ABC transporter (ATP-binding protein)	COG4608	Amino acid transport and metabolism	NP_389019.2	-	appF	+	1212460	1213449	990	CDS	2.20123	-2.31894	1.62313e-06	1.13315e-05	1.2837	0.000703978	0.00290144	-4.98964	1.13315e-05	2.43462	0.00290144	4.36162
conserved hypothetical protein	COG2323	Function unknown	NP_390646.1	yes	yrbG	-	2831124	2831780	657	CDS	1.476	2.11608	5.08246e-05	0.000253814	1.2819	0.0250208	0.058193	4.33515	0.000253814	2.4316	0.058193	0.834976
conserved hypothetical protein	COG2318	Function unknown	NP_389123.1	-	yjoA	-	1313840	1314304	465	CDS	7.29807	-0.602556	0.038537	0.0777651	1.27892	1.28034e-05	9.20457e-05	-1.5184	0.0777651	2.42657	9.20457e-05	123.05
conserved hypothetical protein, phage SPbeta	undefined	undefined	NP_390000.1	-	yomZ	+	2237806	2238201	396	CDS	1.181	0.91848	0.262521	0.369691	1.27795	0.11884	0.204802	1.89012	0.369691	2.42493	0.204802	0.770875
heme-degrading monooxygenase	COG2329	Coenzyme transport and metabolism	NP_388596.1	-	hmoA	-	785113	785439	327	CDS	9.19735	0.820769	0.00579636	0.0155822	1.27628	2.11822e-05	0.000141617	1.76635	0.0155822	2.42213	0.000141617	309.438
conserved hypothetical protein	COG2261	General function prediction only	NP_391697.2	yes	ywzA	+	3918777	3919022	246	CDS	9.05754	-0.0480392	0.91577	0.942637	1.27365	0.00574969	0.01737	-1.03386	0.942637	2.41772	0.01737	357.285
ribosomal RNA-23S	undefined	undefined			rrnW-23S	+	98110	101037	2928	rRNA	3.06382	-0.362174	0.470421	0.582223	1.27217	0.0101717	0.0278552	-1.28536	0.582223	2.41525	0.0278552	6.46311
phosphoribosyl anthranilate isomerase	COG0135	Amino acid transport and metabolism	NP_390146.3	-	trpF	-	2373487	2374134	648	CDS	6.82513	5.66692	6.97109e-27	1.36979e-24	1.27213	0.00648592	0.0191407	50.8058	1.36979e-24	2.41518	0.0191407	6.03922
epoxide hydrolase	COG0596	Coenzyme transport and metabolism|General function prediction only	NP_388739.1	-	yfhM	+	929725	930585	861	CDS	6.65334	-1.31164	0.00582093	0.015638	1.27211	0.00714673	0.0207624	-2.48224	0.015638	2.41515	0.0207624	85.141
murein transglycosylase	COG1376	Cell wall/membrane/envelope biogenesis	NP_389287.1	-	ykuD	-	1476518	1477012	495	CDS	4.18517	1.45869	3.50712e-06	2.27796e-05	1.27172	6.28529e-05	0.000366493	2.74858	2.27796e-05	2.41449	0.000366493	8.98862
membrane bound serine protease Do, quality control protease (heat-shock protein)	COG0265	Posttranslational modification, protein turnover, chaperones	NP_389173.2	1	htrA	-	1357936	1359285	1350	CDS	6.28562	1.55336	2.64617e-07	2.25364e-06	1.27086	2.44859e-05	0.000161859	2.93499	2.25364e-06	2.41306	0.000161859	35.4622
putative ABC efflux transporter (ATP-binding protein)	COG1131	Defense mechanisms	NP_391289.1	-	yvfR	-	3498352	3499257	906	CDS	0.923871	0.757098	0.197934	0.295354	1.2698	0.0284567	0.0646098	1.69009	0.295354	2.41128	0.0646098	0.892758
S-adenosylmethionine riboswitch	undefined	undefined			mswB	-	1385736	1385891	156	No_CDS	4.83927	0.953269	0.0136866	0.032476	1.2687	0.00111458	0.00432862	1.93625	0.032476	2.40944	0.00432862	18.0037
putative transcriptional regulator	COG1733	Transcription	NP_389259.1	-	ykvN	-	1442347	1442703	357	CDS	2.5167	0.4678	0.347624	0.46211	1.26609	0.0105865	0.0288172	1.383	0.46211	2.40509	0.0288172	4.06697
muropeptide L,D-carboxypeptidase	COG1619	Cell wall/membrane/envelope biogenesis	NP_389180.2	-	ldcA	+	1365888	1366847	960	CDS	2.32724	-1.07894	0.0120557	0.0290769	1.26512	0.00090482	0.00362369	-2.11249	0.0290769	2.40346	0.00362369	4.18283
D-alanyl-aminopeptidase	COG2362	Amino acid transport and metabolism	NP_389175.2	-	dppA	+	1360401	1361225	825	CDS	3.11708	-1.70461	0.000576332	0.00215272	1.26362	0.00586017	0.0175977	-3.25942	0.00215272	2.40098	0.0175977	8.38992
putative integral inner membrane protein	COG0730	Function unknown	NP_389122.1	yes	yjnA	-	1312851	1313615	765	CDS	1.88159	-0.0613713	0.948004	0.966127	1.26241	0.181084	0.28332	-1.04346	0.966127	2.39896	0.28332	2.55493
ribosomal RNA-23S	undefined	undefined			rrnB-23S	-	3173991	3176918	2928	rRNA	3.03591	0.105839	0.85648	0.90307	1.26035	0.0321933	0.0712801	1.07612	0.90307	2.39554	0.0712801	5.81265
putative dehydratase	COG1024	Lipid transport and metabolism	NP_388869.3	yes	yhaR	+	1061491	1062258	768	CDS	1.58556	-0.746642	0.204426	0.302621	1.25719	0.0163266	0.0410575	-1.67788	0.302621	2.3903	0.0410575	1.62644
thioredoxin	COG3118	Posttranslational modification, protein turnover, chaperones	NP_390728.1	-	trxA	-	2913024	2913338	315	CDS	8.07871	-0.164938	0.588094	0.687981	1.25658	4.63471e-05	0.000280612	-1.12112	0.687981	2.38928	0.000280612	199.507
conserved hypothetical protein	COG0517	Signal transduction mechanisms	NP_389296.1	-	ykuL	+	1485453	1485896	444	CDS	5.77575	-0.448543	0.116737	0.195126	1.25645	1.07481e-05	7.90695e-05	-1.36466	0.195126	2.38907	7.90695e-05	44.1681
putative hydrolase	COG0561	Coenzyme transport and metabolism|General function prediction only	NP_388864.2	-	yhaX	+	1056702	1057568	867	CDS	6.96693	1.64532	9.24081e-07	6.90957e-06	1.25641	0.000163134	0.000825726	3.12817	6.90957e-06	2.38901	0.000825726	40.5431
putative enzyme with sugar binding fold	undefined	undefined			ytoQ	+	3054746	3055192	447	CDS	5.75126	0.436497	0.115431	0.193327	1.25485	7.08076e-06	5.4809e-05	1.35331	0.193327	2.38642	5.4809e-05	36.8918
conserved hypothetical protein	COG1683	Function unknown	NP_388053.2	-	ybbK	-	193570	194025	456	CDS	2.8732	-0.694995	0.0855146	0.151309	1.25307	0.000974047	0.00385208	-1.61888	0.151309	2.38348	0.00385208	5.83265
putative lipoprotein	undefined	undefined	NP_390300.2	-	yqiH	-	2515614	2515907	294	CDS	1.61461	-1.68958	0.00218549	0.00684319	1.25285	0.00588469	0.0176455	-3.22562	0.00684319	2.38312	0.0176455	2.80605
conserved hypothetical protein	undefined	undefined	NP_388584.1	-	yesU	+	768828	769490	663	CDS	0.150149	-1.09808	0.24342	0.348288	1.25134	0.0988666	0.176554	-2.14069	0.348288	2.38062	0.176554	0.514015
two-component sensor histidine kinase [YkoG]	COG3850	Signal transduction mechanisms	NP_389209.1	yes	ykoH	+	1392643	1394007	1365	CDS	3.97807	1.29229	8.38576e-05	0.000392068	1.25086	0.000163873	0.00082743	2.44917	0.000392068	2.37983	0.00082743	7.54775
nitrate reductase (gamma subunit)	COG2181	Energy production and conversion|Inorganic ion transport and metabolism	NP_391606.1	yes	narI	-	3823558	3824229	672	CDS	1.75352	-0.485852	0.528724	0.634252	1.24712	0.0981463	0.175552	-1.40041	0.634252	2.37367	0.175552	2.35012
tRNA modification GTPase and tRNA-U34 5-formylation enzyme	COG0486	Translation, ribosomal structure and biogenesis	NP_391982.1	-	mnmE	-	4211510	4212889	1380	CDS	8.72591	0.749123	0.00971832	0.0240468	1.24683	2.0087e-05	0.000135176	1.68077	0.0240468	2.3732	0.000135176	270.279
putative transposon-related lytic enzyme	COG0741	Cell wall/membrane/envelope biogenesis	NP_389794.1	1	yocA	+	2085303	2085980	678	CDS	8.89068	3.90585	7.38103e-33	2.01994e-30	1.24668	3.02345e-05	0.000194839	14.9892	2.01994e-30	2.37295	0.000194839	62.7256
conserved hypothetical protein	COG3863	Function unknown	NP_391908.1	1	yycO	-	4138800	4139537	738	CDS	0.877666	-1.67211	0.00748659	0.0192801	1.24412	0.00736502	0.0213011	-3.1868	0.0192801	2.36874	0.0213011	1.43794
putative branched chain amino acids transporter	COG1914	Inorganic ion transport and metabolism	NP_388288.3	yes	ycsG	+	457811	459025	1215	CDS	6.08086	-2.46952	1.16782e-07	1.07971e-06	1.24225	0.00495512	0.0154097	-5.53858	1.07971e-06	2.36568	0.0154097	65.7613
hypothetical protein	undefined	undefined		?	ypuC	-	2433631	2433885	255	CDS	2.05771	2.15211	1.1097e-06	8.13448e-06	1.2419	0.0102707	0.0280887	4.44477	8.13448e-06	2.3651	0.0280887	1.23887
flagellar component of cell-proximal portion of basal-body rod	COG1815	Cell motility	NP_389500.1	-	flgB	+	1691278	1691667	390	CDS	4.7457	-1.0047	0.00910585	0.0227231	1.24031	0.0010784	0.00421043	-2.00652	0.0227231	2.36249	0.00421043	25.415
putative Na+:altronate/mannonate symporter	COG2211	Carbohydrate transport and metabolism	NP_389113.1	yes	exuM	+	1301939	1303318	1380	CDS	1.39671	0.298708	0.609419	0.706693	1.23786	0.0292909	0.0661746	1.23004	0.706693	2.35848	0.0661746	1.3487
pseudouridine synthase	COG1187	Translation, ribosomal structure and biogenesis	NP_390197.2	-	rluB	-	2421438	2422172	735	CDS	7.58274	0.250504	0.3793	0.494922	1.23765	1.77188e-05	0.000122245	1.18962	0.494922	2.35814	0.000122245	123.38
tRNA-Ser	undefined	undefined			trnS-Ser	+	528783	528873	91	tRNA	6.02249	-1.36753	0.000156634	0.000682572	1.2363	0.000513643	0.00223122	-2.58028	0.000682572	2.35594	0.00223122	61.6027
tRNAile lysidine synthetase	COG0037	Translation, ribosomal structure and biogenesis	NP_387948.1	-	tilS	+	74929	76347	1419	CDS	8.96666	0.929148	0.00193255	0.00614019	1.23495	4.22084e-05	0.000258991	1.90415	0.00614019	2.35372	0.000258991	294.026
putative metallophosphoesterase	COG1408	General function prediction only	NP_389288.2	1	ykuE	-	1477069	1477929	861	CDS	4.79536	1.453	1.5339e-06	1.07635e-05	1.23374	5.0015e-05	0.000298852	2.73776	1.07635e-05	2.35175	0.000298852	14.2367
excinuclease ABC (subunit B)	COG0556	Replication, recombination and repair	NP_391397.1	-	uvrB	-	3612945	3614930	1986	CDS	8.38918	0.825189	0.0094548	0.0235081	1.23085	0.000122704	0.000643505	1.77177	0.0235081	2.34705	0.000643505	195.456
L-lactate permease	COG1620	Energy production and conversion	NP_388188.2	yes	lctP	+	330771	332396	1626	CDS	12.3047	-2.04211	0.000445813	0.00171837	1.23001	0.0303262	0.0681013	-4.11849	0.00171837	2.34568	0.0681013	4821.69
conserved hypothetical protein	undefined	undefined	NP_389285.1	-	ykyB	-	1474560	1475024	465	CDS	6.1481	-0.067257	0.852832	0.900127	1.22881	0.000788305	0.00320395	-1.04772	0.900127	2.34373	0.00320395	54.5309
conserved hypothetical protein, putative PBSX prophage protein	undefined	undefined	NP_389154.1	-	xkdS	+	1340932	1341357	426	CDS	2.49222	1.81511	0.000101964	0.000465068	1.22803	0.0104411	0.0284789	3.51886	0.000465068	2.34247	0.0284789	2.39878
putative amidohydrolase	COG1473	General function prediction only	NP_391826.2	-	yxeP	-	4056870	4058012	1143	CDS	3.98269	-1.56176	0.000695717	0.00254765	1.22794	0.0053741	0.0164535	-2.95215	0.00254765	2.34232	0.0164535	15.351
transcriptional regulator (GntR/MocR family) with PLP binding site	COG1167	Transcription|Amino acid transport and metabolism	NP_388271.1	-	gabR	-	440025	441464	1440	CDS	2.89831	-0.399304	0.292704	0.403204	1.22771	0.000703483	0.00290144	-1.31887	0.403204	2.34195	0.00290144	6.06245
guanine deaminase	COG0590	Translation, ribosomal structure and biogenesis	NP_389200.1	-	guaD	-	1382677	1383147	471	CDS	1.2952	1.023	0.0343464	0.0708859	1.22578	0.0120979	0.0319369	2.03214	0.0708859	2.33882	0.0319369	1.21828
putative transcriptional regulator (DeoR family)	COG1349	Transcription|Carbohydrate transport and metabolism		-	ytzE	+	3072401	3072622	222	CDS	8.00052	4.8528	7.1597e-33	2.01994e-30	1.22533	0.000703314	0.00290144	28.8961	2.01994e-30	2.33808	0.00290144	19.5871
Zn transporter	COG2217	Inorganic ion transport and metabolism	NP_389268.1	yes	zosA	+	1451371	1453284	1914	CDS	4.69974	-0.106725	0.745164	0.816141	1.22401	0.000187504	0.000937521	-1.07678	0.816141	2.33595	0.000937521	20.6786
putative transcriptional regulator, phage SPbeta	COG3655	Transcription	NP_389978.1	-	yopB	-	2214972	2215199	228	CDS	0.0118392	-1.07428	0.251033	0.357066	1.22348	0.103652	0.183165	-2.10567	0.357066	2.3351	0.183165	0.514015
transcriptional regulator of cysteine biosynthesis	COG1959	Transcription	NP_390630.2	-	cymR	-	2811717	2812133	417	CDS	6.45329	1.04717	0.00309567	0.00918188	1.22266	0.00058476	0.00249526	2.06648	0.00918188	2.33377	0.00249526	47.3565
galacturonate isomerase	COG1904	Carbohydrate transport and metabolism	NP_389112.1	-	uxaC	+	1300450	1301871	1422	CDS	4.29288	1.9881	3.86032e-06	2.49161e-05	1.22165	0.00508569	0.0157442	3.96713	2.49161e-05	2.33213	0.0157442	5.1419
conserved hypothetical protein, phage SPbeta	undefined	undefined	NP_389865.1	1	yotL	+	2152927	2153169	243	CDS	0.495112	0.533997	0.45732	0.570087	1.22142	0.080778	0.149232	1.44794	0.570087	2.33176	0.149232	0.739704
small RNAs controlled by sporulation	undefined	undefined			surG	+	1731457	1731674	218	No_CDS	6.90129	-0.0567193	0.8571	0.903311	1.22127	0.000125654	0.000655056	-1.0401	0.903311	2.33152	0.000655056	95.2159
hypothetical protein, phage SPbeta	undefined	undefined	NP_389966.1	-	yopM	-	2208328	2208528	201	CDS	1.39685	-1.05888	0.0941755	0.162844	1.21943	0.0317551	0.0705764	-2.08332	0.162844	2.32855	0.0705764	2.09899
transcriptional regulator (multiple metal-sensing ArsR-SmtB transcriptional repressors	COG0640	Transcription	NP_389793.1	-	czrA	-	2084786	2085109	324	CDS	4.4421	0.0871983	0.761413	0.828193	1.21694	1.85245e-05	0.000126317	1.06231	0.828193	2.32454	0.000126317	14.9704
conserved hypothetical protein	undefined	undefined	NP_390079.1	-	ypeQ	-	2308792	2308974	183	CDS	2.45572	0.994715	0.0387183	0.0780641	1.21133	0.0121675	0.0320683	1.99269	0.0780641	2.31551	0.0320683	2.70798
assimilatory nitrate reductase (electron transfer subunit NasB)	COG1251	Energy production and conversion	NP_388214.2	-	nasB	-	360442	362757	2316	CDS	1.82965	-2.07193	0.000315762	0.00125992	1.21125	0.00912324	0.0254746	-4.20448	0.00125992	2.31538	0.0254746	2.81781
5-hydroxyisourate hydrolase	COG2351	Nucleotide transport and metabolism			pucM	+	3334646	3334990	345	CDS	2.74426	0.78148	0.0564978	0.107222	1.20929	0.00320022	0.0107153	1.71889	0.107222	2.31224	0.0107153	3.52032
iron(III) siderophore transport permease	COG0609	Inorganic ion transport and metabolism	NP_388726.1	yes	yfiZ	+	920474	921475	1002	CDS	8.66375	-0.576639	0.0793282	0.141892	1.20715	0.000271729	0.00129252	-1.49137	0.141892	2.30882	0.00129252	256.072
rhamnogalacturonan acetylesterase	COG2755	Amino acid transport and metabolism	NP_388588.1	-	yesY	+	774138	774791	654	CDS	1.11331	0.127061	0.828313	0.88124	1.20613	0.026893	0.0617772	1.09207	0.88124	2.30718	0.0617772	1.01318
conserved hypothetical protein	undefined	undefined	NP_391907.2	1	yycP	-	4137626	4138789	1164	CDS	1.37763	-2.16354	0.000179689	0.000773191	1.20478	0.00482895	0.0150974	-4.48013	0.000773191	2.30502	0.0150974	2.28719
L-asparaginase 2 (putative lipoprotein)	COG0252	Translation, ribosomal structure and biogenesis|Intracellular trafficking, secretion, and vesicular transport	NP_388151.1	-	ansZ	+	290915	292042	1128	CDS	3.25071	0.3468	0.375967	0.491824	1.19515	0.00211477	0.00750313	1.27174	0.491824	2.28969	0.00750313	5.79721
NADPH-dependent aldo-keto reductase	COG0667	General function prediction only	NP_390243.1	-	yqkF	+	2459326	2460246	921	CDS	6.37711	0.507425	0.0798566	0.142563	1.19286	4.41469e-05	0.000269276	1.42151	0.142563	2.28606	0.000269276	49.9493
putative enzyme with DAC domain protein	COG1624	Signal transduction mechanisms	NP_388056.2	yes	ybbP	+	196213	197034	822	CDS	8.22613	2.3202	2.28645e-13	5.58683e-12	1.19278	0.000103462	0.000558096	4.99401	5.58683e-12	2.28592	0.000558096	87.2375
putative peptidase involved in subtilosin production	COG0612	General function prediction only	NP_391622.1	-	albF	+	3841017	3842297	1281	CDS	3.49528	-0.611143	0.0906836	0.158258	1.18904	0.000603169	0.00256315	-1.52747	0.158258	2.28001	0.00256315	9.21431
conserved hypothetical protein	undefined	undefined	NP_389365.1	-	ylaL	-	1550797	1551282	486	CDS	7.7173	0.166774	0.60891	0.706494	1.18774	0.000317533	0.00148122	1.12255	0.706494	2.27796	0.00148122	137.009
ATP synthase (subunit i)	undefined	undefined	NP_391569.1	yes	atpI	-	3787620	3788003	384	CDS	10.286	1.27123	3.62993e-05	0.000187668	1.18415	0.000116367	0.000613246	2.41367	0.000187668	2.2723	0.000613246	523.688
D-mannonate dehydratase	COG1312	Carbohydrate transport and metabolism	NP_389116.1	1	uxuA	+	1305486	1306565	1080	CDS	1.14901	0.337849	0.528168	0.634141	1.18267	0.0196195	0.0479108	1.26387	0.634141	2.26997	0.0479108	1.08125
putative oxidoreductase	COG2072	Inorganic ion transport and metabolism	NP_390541.1	-	yrdP	-	2722767	2723804	1038	CDS	3.40244	0.127685	0.73741	0.812199	1.18041	0.00173598	0.00634533	1.09254	0.812199	2.26641	0.00634533	8.02059
putative phage protein	COG2135	Posttranslational modification, protein turnover, chaperones	NP_389769.1	-	yobE	+	2057801	2058460	660	CDS	4.80755	2.06083	3.67174e-09	4.42009e-08	1.17948	0.000725168	0.00298278	4.17227	4.42009e-08	2.26495	0.00298278	11.1951
serine alkaline protease (subtilisin E)	COG1404	Posttranslational modification, protein turnover, chaperones	NP_388911.2	1	aprE	-	1104423	1105568	1146	CDS	1.74162	-1.02024	0.0286922	0.0611535	1.17898	0.00298207	0.0101169	-2.02826	0.0611535	2.26417	0.0101169	2.75401
phytase	COG4247	Lipid transport and metabolism	NP_389861.1	1	phy	-	2150108	2151256	1149	CDS	1.71379	1.97193	3.17942e-05	0.000167077	1.17881	0.0249872	0.0581477	3.92294	0.000167077	2.26389	0.0581477	0.975979
hypothetical protein	undefined	undefined	NP_388293.1	yes	yczI	+	463245	463490	246	CDS	2.91874	-2.12733	3.41165e-07	2.8361e-06	1.17853	0.000877745	0.00353249	-4.36909	2.8361e-06	2.26346	0.00353249	7.60788
permease of ABC guanosine transporter	COG4603	General function prediction only			nupP	+	3242610	3243656	1047	CDS	1.60091	-0.241931	0.6517	0.741472	1.17725	0.0205787	0.0498728	-1.18257	0.741472	2.26146	0.0498728	2.19338
conserved hypothetical protein	undefined	undefined	NP_388857.1	-	yheE	-	1050443	1050661	219	CDS	4.21112	2.47704	1.02398e-13	2.7119e-12	1.17337	0.000670186	0.00278453	5.56752	2.7119e-12	2.25537	0.00278453	5.12617
small cytoplasmic RNA (scRNA, 4.5S RNA), signal recognition particle-like (SRP) component	undefined	undefined	-	-	scr	+	26379	26732	354	No_CDS	12.8354	0.995483	0.00177696	0.00573012	1.16803	0.00025839	0.00123624	1.99375	0.00573012	2.24704	0.00123624	3838.4
putative integral inner membrane protein	COG0628	General function prediction only			yubA	-	3195558	3196724	1167	CDS	7.33294	0.919384	0.000707524	0.00258628	1.16751	1.88291e-05	0.000127547	1.89131	0.00258628	2.24624	0.000127547	93.5763
putative enzyme, cupin family	COG0662	Carbohydrate transport and metabolism	NP_388322.1	-	ydbB	+	495009	495350	342	CDS	2.92156	-1.21449	0.0012489	0.00423347	1.16613	0.000530137	0.00228834	-2.32058	0.00423347	2.24408	0.00228834	6.48089
putative sulfur transferase	COG0607	Inorganic ion transport and metabolism	NP_390334.2	1	yqhL	+	2544995	2545375	381	CDS	8.20625	0.769591	0.0204179	0.0460018	1.16591	0.000487304	0.00214174	1.70479	0.0460018	2.24374	0.00214174	174.433
putative regulatory protein	COG3679	Signal transduction mechanisms	NP_389382.1	-	ylbF	+	1568420	1568869	450	CDS	9.22539	3.20303	5.71682e-23	6.17567e-21	1.16455	0.000125745	0.000655056	9.2089	6.17567e-21	2.24163	0.000655056	121.868
isochorismatase	COG1535	Secondary metabolites biosynthesis, transport and catabolism			dhbB	-	3287675	3288613	939	CDS	9.46186	-0.195931	0.554316	0.658792	1.16454	0.000514724	0.00223355	-1.14546	0.658792	2.24161	0.00223355	380.002
putative integral inner membrane protein	COG1284	Function unknown	NP_390390.2	yes	yqfU	-	2592003	2592884	882	CDS	5.44802	-0.741124	0.0216003	0.0482423	1.16308	0.000276711	0.00131318	-1.67148	0.0482423	2.23936	0.00131318	37.5167
putative phosphatase	COG4915	Secondary metabolites biosynthesis, transport and catabolism|General function prediction only	NP_387906.1	yes	xpaC	+	35845	36459	615	CDS	5.26167	-0.471644	0.2004	0.298167	1.16187	0.00159137	0.00590647	-1.38669	0.298167	2.23748	0.00590647	30.7226
putative integral inner membrane protein	undefined	undefined	NP_390696.2	yes	ysxD	+	2879363	2879860	498	CDS	4.95247	1.81886	1.05422e-07	9.92559e-07	1.16177	0.000695973	0.00288583	3.52803	9.92559e-07	2.23732	0.00288583	13.1728
general stress protein	COG0693	General function prediction only	NP_390580.2	-	yraA	+	2757492	2758001	510	CDS	7.48425	0.643656	0.0195637	0.0444187	1.15937	3.03566e-05	0.000195261	1.56228	0.0444187	2.2336	0.000195261	114.503
stage III sporulation protein	undefined	undefined	NP_390322.1	yes	spoIIIAB	-	2536181	2536696	516	CDS	0.185543	1.22731	0.263633	0.370494	1.15886	0.300467	0.418107	2.3413	0.370494	2.23281	0.418107	0.277739
blue light GTP-binding receptor	COG1366	Signal transduction mechanisms		-	ytvA	+	3106210	3106995	786	CDS	5.95975	1.0563	0.000366263	0.00144291	1.15718	0.000101808	0.000549895	2.0796	0.00144291	2.23021	0.000549895	32.922
putative catabolic enzyme	COG2079	Carbohydrate transport and metabolism	NP_391825.2	-	yxeQ	-	4055536	4056873	1338	CDS	3.88197	-1.73181	7.84097e-05	0.000370393	1.15459	0.00526213	0.0161806	-3.32145	0.000370393	2.2262	0.0161806	14.914
helicase competence protein	COG4098	Replication, recombination and repair	NP_391427.1	-	comFA	-	3642167	3643558	1392	CDS	2.84529	0.319782	0.623386	0.718132	1.15402	0.0769765	0.144287	1.24814	0.718132	2.22533	0.144287	4.60333
two-component response regulator	COG0745	Signal transduction mechanisms|Transcription			cssR	+	3385724	3386401	678	CDS	4.8627	0.809973	0.00586297	0.0157099	1.15312	9.75176e-05	0.00053162	1.75318	0.0157099	2.22395	0.00053162	17.0158
conserved hypothetical protein	COG4493	Function unknown	NP_389348.1	-	yktB	-	1536235	1536873	639	CDS	7.40217	1.05166	0.000126667	0.000567031	1.152	2.8461e-05	0.000184862	2.07291	0.000567031	2.22221	0.000184862	91.2474
superoxide dismutase (exported lipoprotein)	COG2032	Inorganic ion transport and metabolism	NP_389822.1	-	sodC	-	2114742	2115332	591	CDS	0.383864	0.978994	0.240879	0.345254	1.15154	0.172993	0.274078	1.97109	0.345254	2.22152	0.274078	0.346107
conserved hypothetical protein	undefined	undefined	NP_388879.1	-	yhaI	+	1072768	1073109	342	CDS	5.46262	-0.482568	0.158166	0.248477	1.15126	0.000748354	0.00306281	-1.39723	0.248477	2.22107	0.00306281	37.0432
two-component sensor histidine kinase	COG3290	Signal transduction mechanisms	NP_388639.1	yes	citS	+	830945	832573	1629	CDS	5.21843	-0.659789	0.0403119	0.080801	1.14986	0.000307991	0.00144361	-1.57985	0.080801	2.21893	0.00144361	30.3067
arabinose-related compounds permease	COG2814	Carbohydrate transport and metabolism	NP_391276.1	yes	araE	-	3484072	3485466	1395	CDS	8.24445	0.266687	0.801557	0.860429	1.148	1.74065e-07	2.17185e-06	1.20304	0.860429	2.21606	2.17185e-06	8.0744
conserved hypothetical protein	undefined	undefined	NP_391858.1	yes	yxcE	+	4086802	4087452	651	CDS	6.15209	0.818853	0.00544536	0.0147839	1.14768	0.000108015	0.000575847	1.764	0.0147839	2.21558	0.000575847	39.9871
putative ABC transporter (binding lipoprotein)	COG0834	Amino acid transport and metabolism|Signal transduction mechanisms	NP_391829.1	1	yxeM	-	4059488	4060282	795	CDS	2.77682	-1.52942	0.00279724	0.00841839	1.14468	0.0164755	0.0413324	-2.88669	0.00841839	2.21097	0.0413324	6.82244
conserved hypothetical protein	COG2850	Translation, ribosomal structure and biogenesis	NP_391867.1	-	yxbC	-	4095915	4096907	993	CDS	1.92145	-0.890204	0.108765	0.184419	1.14365	0.0281779	0.0641853	-1.85344	0.184419	2.20939	0.0641853	3.31551
putative integral inner membrane protein	undefined	undefined	NP_390328.1	yes	yqhR	-	2540288	2540824	537	CDS	1.899	-0.293647	0.543187	0.648005	1.14291	0.0109535	0.0295621	-1.22574	0.648005	2.20826	0.0295621	2.52376
putative ABC transporter (permease)	COG0395	Carbohydrate transport and metabolism			ytcP	-	3087321	3088181	861	CDS	2.96223	-0.387444	0.308868	0.419715	1.14116	0.00171635	0.00629074	-1.30807	0.419715	2.20558	0.00629074	5.99746
anti-anti-sigma factor (antagonist of RsbW)	COG1366	Signal transduction mechanisms	NP_388352.1	-	rsbV	+	522088	522417	330	CDS	9.10878	0.292051	0.468194	0.58047	1.14015	0.00511785	0.0158079	1.22438	0.58047	2.20404	0.0158079	379.01
lysine riboswitch	undefined	undefined			kswC	-	2910872	2911051	180	No_CDS	5.61786	1.35335	1.12905e-05	6.47314e-05	1.13943	0.000224732	0.00109824	2.55505	6.47314e-05	2.20294	0.00109824	23.3368
xanthine dehydrogenase, FAD-binding subunit	COG1319	Energy production and conversion			pucC	-	3338501	3339334	834	CDS	0.802676	-0.770612	0.215012	0.314997	1.13924	0.029631	0.0668326	-1.70599	0.314997	2.20264	0.0668326	1.12271
putative hydrolase	COG1073	Signal transduction mechanisms			ytaP	-	3095665	3096564	900	CDS	2.26826	0.876975	0.0309721	0.0653007	1.13653	0.00560685	0.0170869	1.83652	0.0653007	2.19851	0.0170869	2.55522
copper efflux transcriptional regulator	COG0789	Transcription	NP_388837.1	-	cueR	-	1033458	1033889	432	CDS	5.1005	0.80872	0.00685731	0.0178953	1.13124	0.00016799	0.000846132	1.75166	0.0178953	2.19047	0.000846132	22.8545
6Sa RNA	undefined	undefined			ssrSA	-	2095909	2096111	203	No_CDS	6.46043	0.185156	0.586505	0.686514	1.13044	0.000995288	0.00392883	1.13694	0.686514	2.18925	0.00392883	57.2524
putative kinase/phosphotransferase	COG0510	Coenzyme transport and metabolism		-	ytmP	-	3060674	3061288	615	CDS	8.07401	2.24889	1.93196e-09	2.45533e-08	1.13039	0.00187425	0.00679662	4.75318	2.45533e-08	2.18918	0.00679662	92.6881
2-oxoglutarate/malate transporter	COG0471	Carbohydrate transport and metabolism	NP_388638.1	yes	yflS	+	829382	830818	1437	CDS	6.37747	-0.80102	0.0709991	0.129247	1.13012	0.0109964	0.0296391	-1.74233	0.129247	2.18877	0.0296391	68.9532
conserved hypothetical protein	undefined	undefined	NP_390067.1	1	ypjP	-	2298535	2299146	612	CDS	6.48969	1.22797	9.5326e-05	0.000438692	1.12936	0.000336004	0.00154284	2.34237	0.000438692	2.18762	0.00154284	47.9557
S-adenosyl-dependent methyltransferase active on membrane-located substrates	COG0275	Translation, ribosomal structure and biogenesis	NP_389397.1	-	mraW	+	1580622	1581557	936	CDS	9.23371	0.917715	0.0024984	0.00764796	1.12911	0.00021218	0.00104311	1.88912	0.00764796	2.18723	0.00104311	338.792
assimilatory nitrate reductase (catalytic subunit)	COG0243	Energy production and conversion	NP_388213.2	-	nasC	-	358303	360435	2133	CDS	0.898722	-1.84705	0.0165175	0.0382427	1.12904	0.0791356	0.146925	-3.59765	0.0382427	2.18714	0.146925	1.40648
DNA processing Smf single strand binding protein	COG0758	Replication, recombination and repair	NP_389493.1	-	dprA	+	1682580	1683473	894	CDS	4.64343	-1.45611	0.00232932	0.00719479	1.12757	0.0156567	0.0396979	-2.74367	0.00719479	2.1849	0.0396979	25.705
T-box riboswitch specific of proline tRNA	undefined	undefined			tboWA	-	1219164	1219378	215	No_CDS	7.28021	2.25985	6.01501e-12	1.1871e-10	1.12398	0.000440666	0.00197414	4.78943	1.1871e-10	2.17947	0.00197414	56.0319
putative transporter	COG3949	Function unknown	NP_389254.1	yes	ykvI	+	1438092	1439135	1044	CDS	2.0624	0.3969	0.359182	0.47425	1.12383	0.00804539	0.022919	1.31668	0.47425	2.17925	0.022919	2.95338
conserved hypothetical protein	COG4955	Function unknown	NP_390184.1	-	ypbB	-	2408405	2409463	1059	CDS	5.57852	1.04852	0.000447037	0.00172147	1.12317	0.000181644	0.000909327	2.06841	0.00172147	2.17825	0.000909327	26.0108
Na+ ABC efflux transporter (ATP-binding protein)	COG4555	Energy production and conversion|Inorganic ion transport and metabolism	NP_388157.1	-	natA	+	296429	297169	741	CDS	3.31184	-2.32624	7.23054e-11	1.16856e-09	1.12276	0.000133866	0.000692961	-5.01496	1.16856e-09	2.17763	0.000692961	10.0962
spatial and temporal regulator of the dissolution of septal peptidoglycan during engulfment	undefined	undefined	NP_390684.1	1	spoIIB	-	2863294	2864292	999	CDS	1.44584	-0.814178	0.10005	0.17156	1.12267	0.00986211	0.0270816	-1.7583	0.17156	2.1775	0.0270816	2.38246
hexuronate transporter	COG2271	Carbohydrate transport and metabolism	NP_389118.1	yes	exuT	+	1307446	1308714	1269	CDS	1.76408	0.595537	0.221442	0.321777	1.12101	0.0205809	0.0498728	1.51103	0.321777	2.17499	0.0498728	1.96857
(4S)-4-hydroxy-2,3,4, 5-tetrahydro-(2S)-dipicolinic acid (HTPA) dehydratase	COG0289	Amino acid transport and metabolism	NP_390130.1	-	dapB	-	2359340	2360143	804	CDS	6.89422	-0.104529	0.75154	0.820716	1.11942	0.000774285	0.00315948	-1.07514	0.820716	2.1726	0.00315948	84.9485
ribose ABC transporter (ribose-binding lipoprotein)	COG1879	Carbohydrate transport and metabolism	NP_391477.1	1	rbsB	+	3706145	3707062	918	CDS	8.33261	-0.241084	0.675693	0.761802	1.11891	0.0548144	0.110021	-1.18188	0.761802	2.17182	0.110021	147.07
putative metal-dependent phosphohydrolase	COG1418	Translation, ribosomal structure and biogenesis|General function prediction only	NP_390072.1	-	ypgQ	-	2303920	2304537	618	CDS	4.27457	1.06863	0.000258657	0.00105336	1.11829	0.000156375	0.000794454	2.09744	0.00105336	2.1709	0.000794454	9.36193
putative acetyltransferase	COG2153	General function prediction only	NP_389066.1	-	yjcF	-	1256436	1256858	423	CDS	6.27373	0.704417	0.0299302	0.063397	1.11173	0.000666626	0.00277535	1.62949	0.063397	2.16104	0.00277535	46.8851
para-nitrobenzyl esterase (intracellular esterase B)	COG2272	Lipid transport and metabolism	NP_391319.1	-	pnbA	+	3530635	3532104	1470	CDS	5.55495	-0.193204	0.492086	0.601373	1.11092	7.64781e-05	0.000432301	-1.1433	0.601373	2.15983	0.000432301	36.6911
Y family DNA polymerase V bypassing lesions during replication	COG0389	Replication, recombination and repair	NP_390252.1	-	polYB	-	2464562	2465800	1239	CDS	0.851949	0.211524	0.749925	0.819508	1.10961	0.0782973	0.146162	1.15791	0.819508	2.15788	0.146162	0.928196
putative Xaa-Pro dipeptidase	COG0006	Amino acid transport and metabolism	NP_389269.1	-	ykvY	+	1453691	1454782	1092	CDS	7.8591	0.43901	0.141335	0.228413	1.1091	0.000232057	0.00113001	1.35567	0.228413	2.15711	0.00113001	155.527
membrane bound high-affinity DNA-binding receptor	COG1555	Replication, recombination and repair	NP_390437.1	1	comEA	-	2640513	2641130	618	CDS	1.95013	0.429223	0.303561	0.414842	1.10813	0.00655578	0.0192914	1.34651	0.414842	2.15566	0.0192914	2.42597
aminoglycoside 6-adenylyltransferase	undefined	undefined	NP_390556.1	-	aadK	-	2735682	2736536	855	CDS	4.38328	0.130564	0.666107	0.754517	1.10776	0.000234733	0.00114033	1.09472	0.754517	2.15511	0.00114033	15.5132
rhamnogalacturonan exolyase YesX	undefined	undefined	NP_388587.1	-	rhgX	+	772142	773980	1839	CDS	1.79175	0.0785587	0.879654	0.919058	1.10732	0.0277661	0.0633574	1.05596	0.919058	2.15445	0.0633574	2.01547
fructose-amino acid permease	COG1175	Carbohydrate transport and metabolism			frlN	-	3348825	3349703	879	CDS	1.06014	0.194955	0.73433	0.809894	1.10706	0.0446101	0.0928983	1.14469	0.809894	2.15406	0.0928983	1.41707
tRNA-Ser	undefined	undefined			trnB-Ser1	-	3172694	3172786	93	tRNA	3.96049	-2.02923	6.18773e-09	7.20921e-08	1.1068	0.000418331	0.00188501	-4.08188	7.20921e-08	2.15368	0.00188501	16.1972
putative nitric-oxide reductase	COG0714	General function prediction only	NP_389821.1	-	yojN	-	2113764	2114678	915	CDS	6.34291	1.244	0.000215238	0.000903428	1.10653	0.000995366	0.00392883	2.36854	0.000903428	2.15327	0.00392883	42.7855
xanthine dehydrogenase, substrate and molybdenum cofactor subunit	COG1529	Energy production and conversion			pucD	-	3336263	3338500	2238	CDS	2.92877	0.114509	0.732145	0.808571	1.10502	0.000632221	0.00265365	1.08261	0.808571	2.15102	0.00265365	5.09044
putative transcriptional regulator	COG1733	Transcription	NP_391934.1	-	yybR	-	4167622	4167999	378	CDS	4.23954	0.880899	0.0529149	0.101503	1.09992	0.0163286	0.0410575	1.84152	0.101503	2.14343	0.0410575	11.5202
DNA binding protein	COG0718	General function prediction only	NP_387901.1	-	yaaK	+	28529	28852	324	CDS	7.90944	1.49929	1.53067e-05	8.53721e-05	1.09966	0.00138762	0.00521435	2.82704	8.53721e-05	2.14304	0.00521435	109.25
putative Na+/H+ antiporter	COG0475	Inorganic ion transport and metabolism	NP_389046.1	yes	yjbQ	+	1240356	1242200	1845	CDS	7.15278	0.863586	0.0224752	0.0499517	1.09714	0.00389685	0.0125759	1.81956	0.0499517	2.1393	0.0125759	101.197
negative regulator of transcription of ribonucleotide reductase nrd genes and operons	COG1327	Transcription	NP_390778.1	-	nrdR	-	2965681	2966139	459	CDS	6.49276	2.13209	6.64019e-12	1.298e-10	1.09675	0.000331042	0.00152346	4.38351	1.298e-10	2.13873	0.00152346	31.8548
putative phosphatidylglycerophosphatase	COG1267	Lipid transport and metabolism	NP_390066.1	-	ypjQ	-	2297984	2298517	534	CDS	6.6909	1.09039	0.000585804	0.00218413	1.09488	0.00056983	0.00243408	2.12931	0.00218413	2.13596	0.00243408	55.0501
6-carboxyhexanoate-CoA ligase (pimeloyl-CoA synthase)	COG1424	Coenzyme transport and metabolism		-	bioW	-	3094679	3095455	777	CDS	3.18716	2.09393	3.55173e-08	3.58227e-07	1.09126	0.00703376	0.0204654	4.2691	3.58227e-07	2.13059	0.0204654	2.63476
conserved hypothetical protein, PBSX phage protein	COG3953	Mobilome: prophages, transposons	NP_389150.2	yes	xkdO	+	1334966	1338964	3999	CDS	5.8417	1.88306	1.0463e-05	6.03241e-05	1.08962	0.00955359	0.02645	3.68857	6.03241e-05	2.12818	0.02645	27.0536
D-galactarate dehydratase	COG2721	Carbohydrate transport and metabolism	NP_388133.2	-	garD	+	274029	275561	1533	CDS	4.55665	-0.343608	0.28364	0.392961	1.08961	0.000565136	0.00242412	-1.26893	0.392961	2.12817	0.00242412	16.1339
choline ABC transporter (choline-binding lipoprotein)	COG1732	Cell wall/membrane/envelope biogenesis	NP_391251.1	1	opuBC	-	3460503	3461423	921	CDS	3.11289	-1.10875	0.00442706	0.0123711	1.08833	0.00258087	0.0089254	-2.15659	0.0123711	2.12628	0.0089254	7.79181
methylase of U1498 in 16S rRNA	COG1385	Translation, ribosomal structure and biogenesis	NP_390422.1	-	rsmE	-	2623032	2623802	771	CDS	7.45023	-0.534917	0.074345	0.134503	1.08692	0.000309752	0.00144865	-1.44886	0.134503	2.1242	0.00144865	162.264
putative NADH dehydrogenase	COG1252	Energy production and conversion			yutJ	+	3308867	3309934	1068	CDS	7.99651	-1.09636	0.000567069	0.00212392	1.08688	0.000606387	0.00257151	-2.13815	0.00212392	2.12414	0.00257151	239.675
glutamyl aminopeptidase	COG1363	Amino acid transport and metabolism|Carbohydrate transport and metabolism			ytoP	-	3055247	3056320	1074	CDS	7.03621	-0.534795	0.0675317	0.123813	1.08633	0.000213989	0.00105075	-1.44874	0.123813	2.12334	0.00105075	101.386
conserved hypothetical protein	COG4918	Function unknown	NP_390247.1	-	yqkB	-	2461873	2462196	324	CDS	4.92862	1.02727	0.00232131	0.00717544	1.08606	0.00136399	0.00514632	2.03816	0.00717544	2.12294	0.00514632	17.6835
putative integral inner membrane component	COG5578	Function unknown	NP_388585.1	yes	yesV	+	769487	770113	627	CDS	0.275262	-0.546422	0.492299	0.601454	1.08484	0.124402	0.211545	-1.46046	0.601454	2.12114	0.211545	0.640165
catalase 2	COG0693	General function prediction only	NP_391784.2	-	katE	-	4008143	4010203	2061	CDS	9.0303	0.0451644	0.930966	0.953735	1.08341	0.0398916	0.0847592	1.0318	0.953735	2.11903	0.0847592	374.813
DNA-damage lesion bypass DNA polymerase	COG0389	Replication, recombination and repair	NP_390268.2	-	polYA	-	2482269	2483513	1245	CDS	5.0219	0.0946598	0.750035	0.819508	1.0831	0.000265312	0.00126493	1.06781	0.819508	2.11859	0.00126493	23.6471
adaptor protein controlling oligomerization of the AAA+ protein ClpC	COG4862	Transcription|Signal transduction mechanisms|Cell motility	NP_389034.1	-	mecA	+	1229068	1229724	657	CDS	8.98552	3.15622	9.85781e-23	9.86983e-21	1.08247	0.000323554	0.00149909	8.91489	9.86983e-21	2.11766	0.00149909	125.234
putative ferredoxin/thioredoxin reductase	COG0492	Posttranslational modification, protein turnover, chaperones	NP_388209.1	1	ycgT	+	352858	353868	1011	CDS	9.1686	0.482436	0.136435	0.222601	1.08028	0.000949282	0.00376867	1.3971	0.222601	2.11445	0.00376867	317.699
conserved hypothetical protein	COG0398	Function unknown	NP_390449.1	yes	yqeD	+	2649842	2650468	627	CDS	5.54558	0.819517	0.00773832	0.0197794	1.07985	0.000483423	0.00213129	1.76482	0.0197794	2.11382	0.00213129	25.8002
cytochrome c550	COG2010	Energy production and conversion	NP_390398.1	1	cccA	-	2599523	2599885	363	CDS	3.80488	-2.19591	1.74638e-09	2.24915e-08	1.07593	0.000826341	0.003342	-4.5818	2.24915e-08	2.10808	0.003342	14.2043
fructose-amino acid permease	COG0395	Carbohydrate transport and metabolism			frlM	-	3347919	3348821	903	CDS	0.180608	0.620186	0.438214	0.55218	1.07467	0.174887	0.276119	1.53707	0.55218	2.10624	0.276119	0.530039
putative lipoprotein	undefined	undefined			yusW	-	3380157	3380594	438	CDS	0.502602	-0.595001	0.380866	0.496625	1.07395	0.0709507	0.135403	-1.51047	0.496625	2.1052	0.135403	1.05891
conserved hypothetical protein	COG3382	General function prediction only	NP_388771.1	-	yhzB	-	967229	967852	624	CDS	4.70413	0.640763	0.0345998	0.0713014	1.07367	0.0004272	0.00192076	1.55915	0.0713014	2.10478	0.00192076	17.7133
sodium/proton-dependent alanine transporter	COG1115	Amino acid transport and metabolism	NP_390659.2	yes	yrbD	+	2841611	2843065	1455	CDS	4.76029	0.346029	0.274795	0.383294	1.0732	0.00073116	0.00300141	1.27106	0.383294	2.10409	0.00300141	16.9711
iron-uptake protein	COG0609	Inorganic ion transport and metabolism	NP_388043.1	yes	feuB	-	181347	182351	1005	CDS	7.95617	-0.0146439	0.964419	0.978241	1.07149	0.00121492	0.00465227	-1.0102	0.978241	2.1016	0.00465227	110.406
urocanase	COG2987	Amino acid transport and metabolism	NP_391815.1	-	hutU	+	4043574	4045232	1659	CDS	2.30243	-0.915194	0.0181448	0.0416115	1.06899	0.00173743	0.00634533	-1.88582	0.0416115	2.09796	0.00634533	4.21856
putative sulfate adenylyltransferase	COG2046	Inorganic ion transport and metabolism	NP_388973.2	-	yitA	-	1170473	1171642	1170	CDS	0.280865	-0.68144	0.337436	0.450757	1.06806	0.0773611	0.144876	-1.60374	0.450757	2.09661	0.144876	0.74573
putative Fe-S oxidoreductase, radical SAM superfamily	COG0535	General function prediction only	NP_388677.2	-	yfkA	-	868007	869128	1122	CDS	8.57961	2.26153	1.95238e-11	3.46948e-10	1.06796	0.001076	0.00420665	4.795	3.46948e-10	2.09647	0.00420665	114.658
two-component response regulator	COG4565	Transcription|Signal transduction mechanisms	NP_388640.1	-	citT	+	832545	833225	681	CDS	3.65626	-0.655944	0.0747761	0.135223	1.06423	0.00277274	0.00952478	-1.57565	0.135223	2.09105	0.00952478	10.249
HTH-type transcriptional regulator BsdA (LysR family)	COG0583	Transcription	NP_388244.1	-	bsdA	-	411578	412450	873	CDS	4.02749	-0.183221	0.668701	0.756412	1.06384	0.0126095	0.0329675	-1.13542	0.756412	2.09049	0.0329675	12.8987
hypothetical protein	undefined	undefined	NP_390658.1	-	yrzH	+	2841169	2841300	132	CDS	0.30338	1.09749	0.1452	0.233107	1.06367	0.169729	0.269635	2.13982	0.233107	2.09025	0.269635	0.555478
putative transcriptional regulator (MarR family)	COG1846	Transcription	NP_388722.1	-	yfiV	-	916124	916606	483	CDS	4.92903	0.440238	0.146607	0.234446	1.0627	0.000483887	0.00213129	1.35683	0.234446	2.08884	0.00213129	18.9221
putative 2,4-dienoyl-CoA reductase	COG1028	Lipid transport and metabolism|Secondary metabolites biosynthesis, transport and catabolism|General function prediction only	NP_389289.1	1	fadH	+	1478072	1478836	765	CDS	2.58733	-0.458435	0.270426	0.378743	1.06207	0.0076615	0.0219933	-1.37405	0.378743	2.08792	0.0219933	5.18998
putative integral inner membrane protein	undefined	undefined	NP_388304.1	yes	ydaH	+	474731	475540	810	CDS	7.21615	3.52939	8.01023e-14	2.16559e-12	1.06162	0.0152199	0.0387819	11.5466	2.16559e-12	2.08727	0.0387819	28.9102
putative protein involved in cell division or replication	COG2001	Translation, ribosomal structure and biogenesis	NP_389396.1	-	mraZ	+	1580121	1580552	432	CDS	8.73132	1.20153	0.000106149	0.00048255	1.05891	0.00061766	0.00260318	2.29983	0.00048255	2.08336	0.00260318	217.67
putative permease	COG2814	Carbohydrate transport and metabolism	NP_390654.2	yes	csbX	-	2837469	2838776	1308	CDS	8.0216	-0.395095	0.396964	0.512271	1.05753	0.0245748	0.0573831	-1.31503	0.512271	2.08136	0.0573831	213.41
conserved hypothetical protein	undefined	undefined	YP_003097741.1	-	yoyC	-	2122672	2122950	279	CDS	6.45067	1.20632	0.000218968	0.000916271	1.05609	0.00121154	0.00464369	2.30748	0.000916271	2.07928	0.00464369	47.1134
conserved hypothetical protein	undefined	undefined	NP_389606.3	-	ymzB	-	1860014	1860370	357	CDS	3.58438	0.565954	0.199864	0.297585	1.05375	0.0176409	0.0436766	1.48037	0.297585	2.07592	0.0436766	8.06837
two-component apoptosis factor (toxin/antitoxin system)	undefined	undefined	NP_389166.1	yes	spoIISA	-	1348612	1349358	747	CDS	7.7024	3.39616	7.62899e-26	1.25268e-23	1.05316	0.000497317	0.00217642	10.528	1.25268e-23	2.07507	0.00217642	41.8065
urease (gamma subunit)	COG0831	Amino acid transport and metabolism	NP_391547.1	-	ureA	-	3768791	3769108	318	CDS	0.47929	-0.690734	0.298582	0.409662	1.04984	0.0657599	0.127152	-1.6141	0.409662	2.0703	0.127152	1.00715
putative integral inner membrane protein	COG1284	Function unknown	NP_388993.1	yes	yitT	+	1188689	1189531	843	CDS	8.07366	0.399362	0.197563	0.294907	1.04954	0.000787847	0.00320395	1.31892	0.294907	2.06988	0.00320395	193.492
tRNA-Lys	undefined	undefined			trnY-Lys	-	4155134	4155209	76	tRNA	5.26299	-0.782207	0.190004	0.285911	1.04954	0.0786894	0.146428	-1.71976	0.285911	2.06987	0.146428	37.0811
glycerate kinase	COG1929	Carbohydrate transport and metabolism	NP_391884.2	-	glxK	-	4112073	4113221	1149	CDS	4.32976	0.410123	0.174315	0.266912	1.04938	0.000522223	0.0022637	1.3288	0.266912	2.06965	0.0022637	13.9078
putative iron-chelator esterase	COG2819	General function prediction only	NP_388041.2	1	ybbA	-	179595	180347	753	CDS	6.80312	-0.118917	0.774056	0.839055	1.04892	0.0119162	0.0315995	-1.08592	0.839055	2.06899	0.0315995	48.4523
conserved hypothetical protein	undefined	undefined	NP_390330.1	yes	yqhP	+	2542047	2542442	396	CDS	6.7725	0.398525	0.211165	0.310358	1.04764	0.00111012	0.0043154	1.31816	0.310358	2.06715	0.0043154	74.0993
two-component apoptotic control system component B (antitoxin)	undefined	undefined	NP_389165.1	-	spoIISB	-	1348442	1348612	171	CDS	5.95546	3.00586	9.01945e-22	8.22774e-20	1.04721	0.000625008	0.00262875	8.03255	8.22774e-20	2.06653	0.00262875	15.5788
putative phage-related pre-neck appendage protein	COG5434	Carbohydrate transport and metabolism	NP_389784.1	-	yobO	+	2076206	2078626	2421	CDS	2.39673	0.883495	0.0238141	0.0527561	1.04563	0.00840973	0.0238082	1.84484	0.0527561	2.06426	0.0238082	2.49229
conserved hypothetical protein	undefined	undefined			yugN	-	3219837	3220241	405	CDS	5.03303	0.434744	0.191075	0.287207	1.04354	0.00179257	0.00653508	1.35167	0.287207	2.06128	0.00653508	19.0923
putative oxidoreductase	COG0604	Energy production and conversion|General function prediction only	NP_389725.1	1	yogA	+	2007526	2008515	990	CDS	3.06942	0.819069	0.0301921	0.0638858	1.043	0.00620224	0.0184628	1.76427	0.0638858	2.06051	0.0184628	4.68199
putative acyl-CoA dehydrogenase	COG1960	Lipid transport and metabolism	NP_388333.1	-	ydbM	+	505152	506297	1146	CDS	7.10615	0.130647	0.742073	0.814235	1.04267	0.00926451	0.0257836	1.09478	0.814235	2.06004	0.0257836	97.7844
conserved hypothetical protein	undefined	undefined	NP_391641.1	-	ywzC	-	3860998	3861222	225	CDS	4.63393	1.52008	6.7248e-05	0.000322492	1.04243	0.00644531	0.0190345	2.86807	0.000322492	2.05969	0.0190345	11.2241
putative lipid kinase BmrU	COG1597	Lipid transport and metabolism|General function prediction only	NP_390280.2	-	bmrU	+	2493662	2494555	894	CDS	6.62135	1.28533	0.00992016	0.0245087	1.04237	0.035818	0.077754	2.43738	0.0245087	2.05961	0.077754	48.3023
putative integral inner membrane protein	undefined	undefined	NP_391535.1	yes	ywnJ	-	3759169	3759591	423	CDS	3.49178	2.25331	2.36388e-06	1.59621e-05	1.04212	0.0300183	0.0674835	4.76776	1.59621e-05	2.05925	0.0674835	4.39073
putative ABC transporter (ATP-binding protein)	COG1132	Defense mechanisms	NP_389315.1	yes	yknU	+	1499889	1501646	1758	CDS	2.32276	-0.867322	0.0412808	0.0824211	1.04048	0.00721353	0.0209269	-1.82427	0.0824211	2.05691	0.0209269	4.27634
energizing coupling factor of ABC influx transporter (ATP-binding protein)	COG1122	Inorganic ion transport and metabolism|General function prediction only	NP_388027.1	-	ecfAB	+	151303	152133	831	CDS	8.1065	-1.33285	0.00492997	0.0135459	1.03668	0.0274998	0.0628195	-2.519	0.0135459	2.05151	0.0628195	274.179
putative DNA binding protein	undefined	undefined	NP_389075.1	-	yjcO	+	1265887	1266348	462	CDS	1.88966	-1.72441	0.0076134	0.0195453	1.03617	0.0762865	0.14361	-3.30445	0.0195453	2.05077	0.14361	3.42417
phosphoenolpyruvate carboxykinase	COG1866	Energy production and conversion			pckA	+	3129530	3131113	1584	CDS	6.47134	-0.0122765	0.968384	0.980158	1.03608	0.000895449	0.00359318	-1.00855	0.980158	2.05065	0.00359318	70.2026
tRNA-Met	undefined	undefined			trnB-Met1	-	3172872	3172948	77	tRNA	0.817366	-1.109	0.0833143	0.14799	1.03596	0.0605015	0.119174	-2.15697	0.14799	2.05048	0.119174	1.46882
hypothetical protein, phage SPbeta	undefined	undefined	NP_389972.1	-	yopG	-	2211884	2212015	132	CDS	0.405886	0.064212	0.925234	0.949996	1.03552	0.106131	0.186662	1.04551	0.949996	2.04985	0.186662	0.708239
glycolate oxidase iron-sulfur subunit	COG0247	Energy production and conversion	NP_390747.1	-	glcF	+	2934594	2935928	1335	CDS	7.73936	1.85345	6.416e-05	0.000309855	1.03519	0.0228622	0.0539674	3.61364	0.000309855	2.04939	0.0539674	76.9941
putative integral inner membrane protein	COG1963	General function prediction only		yes	yuiD	+	3298077	3298553	477	CDS	6.37449	1.14308	4.69336e-05	0.000236997	1.0351	0.000233814	0.00113721	2.20852	0.000236997	2.04925	0.00113721	43.4279
conserved hypothetical protein	undefined	undefined	NP_388323.1	-	ydbC	+	495344	495703	360	CDS	3.67131	-0.502906	0.114664	0.192513	1.03426	0.000738619	0.00302598	-1.41707	0.192513	2.04806	0.00302598	10.4169
putative lyase/dioxygenase	COG0346	Secondary metabolites biosynthesis, transport and catabolism	NP_389838.1	-	yodE	-	2129082	2129993	912	CDS	3.40483	2.30883	1.7533e-09	2.24915e-08	1.03355	0.0109102	0.0295035	4.9548	2.24915e-08	2.04705	0.0295035	3.23655
arabinose/arabinan permease	COG1175	Carbohydrate transport and metabolism	NP_390752.1	yes	araP	-	2940697	2941638	942	CDS	5.10554	0.356443	0.754131	0.821796	1.0335	1.37747e-06	1.35275e-05	1.28027	0.821796	2.04698	1.35275e-05	1.29033
putative oxidoreductase	COG0702	General function prediction only	NP_388569.1	-	yesF	+	754920	755780	861	CDS	4.19914	-0.626101	0.0442745	0.0872687	1.03317	0.000621298	0.00261582	-1.54339	0.0872687	2.04652	0.00261582	15.6323
putative hydrolase	COG1073	Signal transduction mechanisms	NP_388996.1	-	yitV	+	1191423	1192190	768	CDS	6.24276	0.160873	0.573509	0.675927	1.03018	0.000340892	0.00156179	1.11796	0.675927	2.04228	0.00156179	56.2151
putative efflux transporter	COG2814	Carbohydrate transport and metabolism	NP_389286.2	yes	ykuC	-	1475150	1476442	1293	CDS	7.47587	0.486629	0.0801259	0.142945	1.02923	0.000238443	0.0011529	1.40117	0.142945	2.04093	0.0011529	122.162
putative aminoacid transporter	COG1115	Amino acid transport and metabolism	NP_388656.1	yes	yflA	+	844770	846185	1416	CDS	7.50342	-1.70954	0.00457636	0.0127363	1.02864	0.0820555	0.151252	-3.27057	0.0127363	2.04011	0.151252	164.326
FrlR transcriptional regulator (GntR family)	COG2188	Transcription			frlR	+	3346298	3347026	729	CDS	5.45922	0.562883	0.100681	0.172206	1.02805	0.00288175	0.00981562	1.47722	0.172206	2.03927	0.00981562	31.558
putative S-adenosylmethionine-dependent methyltransferase	COG2226	Coenzyme transport and metabolism	NP_389841.1	-	yodH	+	2133455	2134156	702	CDS	0.301986	1.61903	0.0318412	0.0666537	1.02777	0.219645	0.32991	3.07168	0.0666537	2.03887	0.32991	0.325229
conserved hypothetical protein	COG0705	Posttranslational modification, protein turnover, chaperones	NP_388342.1	yes	ydcA	-	515016	515615	600	CDS	4.92819	0.0542148	0.866994	0.909535	1.02706	0.00152602	0.00567419	1.03829	0.909535	2.03787	0.00567419	22.1136
SpoIIAA-phosphate serine phosphatase	COG2208	Signal transduction mechanisms|Transcription	NP_387945.1	yes	spoIIE	+	70538	73021	2484	CDS	5.65919	-0.828288	0.0664784	0.122539	1.0267	0.0225487	0.0534328	-1.77558	0.122539	2.03736	0.0534328	47.1877
transcriptional regulator CitR (LysR family)	COG0583	Transcription	NP_388824.2	-	citR	-	1020073	1020948	876	CDS	4.09753	-0.361884	0.303238	0.414842	1.02488	0.00311721	0.0104886	-1.2851	0.414842	2.03479	0.0104886	14.5834
putative enzyme involved in polysaccharide biosynthesis	COG2244	Cell wall/membrane/envelope biogenesis			ytgP	-	3073531	3075165	1635	CDS	8.99042	0.821909	0.00608615	0.0161706	1.02437	0.000659433	0.00275014	1.76774	0.0161706	2.03407	0.00275014	302.036
putative efflux protein	undefined	undefined			yvqJ	-	3399092	3400360	1269	CDS	2.91022	-1.73968	4.6234e-06	2.92435e-05	1.02422	0.00169175	0.00622838	-3.3396	2.92435e-05	2.03386	0.00622838	7.06357
anti-holin factor controlling activity of murein hydrolases	COG1346	Cell wall/membrane/envelope biogenesis	NP_391712.2	yes	ywbG	+	3933577	3934254	678	CDS	7.08447	-1.13834	0.000950879	0.00334175	1.02399	0.00275153	0.00945982	-2.20128	0.00334175	2.03353	0.00945982	138.23
3-dehydroquinate dehydratase, type II	COG0757	Amino acid transport and metabolism	NP_390327.1	-	aroQ	-	2539755	2540201	447	CDS	7.41549	0.0608707	0.843671	0.892825	1.02016	0.00104936	0.00411426	1.0431	0.892825	2.02814	0.00411426	123.593
putative sugar transporter	COG2814	Carbohydrate transport and metabolism	NP_388707.1	yes	yfiG	+	900080	901528	1449	CDS	3.42158	-0.647604	0.0726098	0.131828	1.01932	0.00310091	0.0104509	-1.56656	0.131828	2.02696	0.0104509	8.08586
diadenylate cyclase, DNA integrity scanning protein, cell cycle checkpoint DNA scanning protein	COG1623	Signal transduction mechanisms	NP_387969.1	-	disA	+	107476	108558	1083	CDS	8.08071	2.82759	6.37057e-15	2.02722e-13	1.01817	0.00308082	0.0104003	7.0989	2.02722e-13	2.02535	0.0104003	79.3826
conserved hypothetical protein	undefined	undefined	NP_389089.1	yes	yjdJ	-	1278565	1278894	330	CDS	1.58206	0.00106206	0.998134	0.998864	1.01709	0.0282708	0.0642946	1.00074	0.998864	2.02383	0.0642946	2.25601
rhamnulokinase	COG1070	Carbohydrate transport and metabolism			rhaB	-	3199565	3201022	1458	CDS	4.60228	-0.1897	0.569628	0.672319	1.01703	0.00219846	0.00777988	-1.14053	0.672319	2.02375	0.00777988	19.5659
conserved hypothetical protein	undefined	undefined	NP_391221.1	-	yvgO	+	3427802	3428287	486	CDS	2.95109	-1.56796	0.00112985	0.00388445	1.01517	0.022463	0.0533009	-2.96485	0.00388445	2.02114	0.0533009	7.18708
proton/glutamate symport protein	COG1301	Energy production and conversion	NP_388116.1	yes	gltP	-	253518	254762	1245	CDS	2.35379	-0.782154	0.0910633	0.158624	1.01385	0.0166218	0.0415798	-1.7197	0.158624	2.01929	0.0415798	3.19082
two-component response regulator [YrkQ]	COG0745	Signal transduction mechanisms|Transcription	NP_390520.1	-	yrkP	-	2704435	2705130	696	CDS	2.89711	0.260683	0.508408	0.616366	1.01136	0.00960428	0.0265106	1.19805	0.616366	2.01581	0.0265106	5.79927
O6-alkylguanine DNA alkyltransferase	COG0350	Replication, recombination and repair	NP_389237.1	-	ogt	+	1421426	1421923	498	CDS	4.90799	1.23847	0.000231166	0.000960461	1.01134	0.00280352	0.00959039	2.35948	0.000960461	2.01578	0.00959039	15.4275
putative efflux transporter	COG2814	Carbohydrate transport and metabolism	NP_388721.1	yes	yfiU	-	914457	916013	1557	CDS	3.13271	0.152363	0.674708	0.7609	1.01037	0.00492496	0.0153359	1.11139	0.7609	2.01443	0.0153359	6.76775
glutamate racemase	COG0796	Cell wall/membrane/envelope biogenesis	NP_390558.1	-	yrpC	+	2738308	2739105	798	CDS	4.0866	1.17025	0.00549793	0.014897	1.00716	0.0172257	0.0428555	2.2505	0.014897	2.00995	0.0428555	9.98063
conserved hypothetical protein	undefined	undefined	NP_389299.1	-	ykuO	+	1487504	1488397	894	CDS	9.53705	0.918966	0.00306521	0.00910469	1.00713	0.00119856	0.00460147	1.89076	0.00910469	2.00991	0.00460147	379.819
protein involved in establishment of DNA transport in competence	COG4469	General function prediction only	NP_389035.1	-	coiA	+	1229915	1231036	1122	CDS	2.86778	2.03874	0.00406733	0.0115546	0.997988	0.159859	0.258051	4.10888	0.0115546	1.99721	0.258051	2.50744
putative metalloprotease	COG0612	General function prediction only	NP_389566.2	-	ymfF	+	1757037	1758317	1281	CDS	7.76797	0.520575	0.06504	0.120211	0.996435	0.000451148	0.00200864	1.43453	0.120211	1.99506	0.00200864	133.764
conserved hypothetical protein, PBSX prophage protein	undefined	undefined	NP_389159.1	-	xkdW	+	1345305	1345634	330	CDS	1.75207	1.69094	8.90358e-05	0.000414319	0.995336	0.0322201	0.0712845	3.22867	0.000414319	1.99354	0.0712845	1.5538
two-component response regulator [YhcY]	COG2197	Signal transduction mechanisms|Transcription	NP_388814.1	-	yhcZ	+	1009804	1010448	645	CDS	3.6545	-0.144917	0.713268	0.794563	0.994417	0.0108534	0.0293693	-1.10567	0.794563	1.99228	0.0293693	9.56468
2-phosphosulfolactate phosphatase	COG2045	Coenzyme transport and metabolism|General function prediction only	NP_388975.1	-	slpH	+	1172650	1173336	687	CDS	1.29072	-0.566297	0.240636	0.345147	0.992045	0.0200456	0.0488352	-1.48072	0.345147	1.989	0.0488352	1.89962
spore endopeptidase	undefined	undefined	NP_390432.1	-	gpr	-	2634505	2635611	1107	CDS	2.00695	0.910447	0.0622605	0.115962	0.991784	0.0454378	0.0943461	1.87963	0.115962	1.98864	0.0943461	1.86903
nucleoside diphosphate kinase	COG0105	Nucleotide transport and metabolism	NP_390154.1	-	ndk	-	2381354	2381803	450	CDS	9.08228	-1.66772	1.71077e-06	1.18627e-05	0.990282	0.00380613	0.0123219	-3.17713	1.18627e-05	1.98657	0.0123219	517.44
tRNA-Arg	undefined	undefined			trnB-Arg	-	3173138	3173214	77	tRNA	1.37586	-1.60712	0.00364807	0.0105609	0.98827	0.0298624	0.0672437	-3.04644	0.0105609	1.9838	0.0672437	2.37673
tRNA-Met	undefined	undefined			trnE-Met	+	640268	640344	77	tRNA	2.02101	-1.20048	0.06496	0.120117	0.986158	0.108908	0.190566	-2.29816	0.120117	1.9809	0.190566	3.8776
D-alanine racemase	COG0787	Cell wall/membrane/envelope biogenesis	NP_388345.1	-	alrA	+	517372	518541	1170	CDS	7.31365	0.0886059	0.763969	0.830093	0.984881	0.000926176	0.00369121	1.06334	0.830093	1.97915	0.00369121	121.014
putative bacteriophage integrase	COG0582	Replication, recombination and repair|Mobilome: prophages, transposons	NP_389721.2	-	yoeC	-	2003401	2003946	546	CDS	3.4956	0.663317	0.0538293	0.103016	0.982603	0.00449282	0.0142198	1.58372	0.103016	1.97603	0.0142198	7.22662
putative glycosyltransferase	COG0707	Cell wall/membrane/envelope biogenesis	NP_389218.2	-	ykoN	-	1398975	1400096	1122	CDS	1.12655	-0.0531028	0.920286	0.945999	0.981832	0.0518297	0.105275	-1.03749	0.945999	1.97497	0.105275	1.50146
levanase	COG1621	Carbohydrate transport and metabolism	NP_390581.1	1	sacC	-	2758043	2760076	2034	CDS	3.90067	1.14145	0.00648955	0.0170761	0.981638	0.0204775	0.0496809	2.20603	0.0170761	1.97471	0.0496809	6.81495
hypothetical protein	undefined	undefined	NP_388803.2	-	yhcU	+	996643	997038	396	CDS	2.41214	-0.486334	0.196285	0.293748	0.980687	0.00491522	0.0153204	-1.40088	0.293748	1.9734	0.0153204	4.30751
SPbeta phage putative thiol disulfide oxidoreductase	COG0526	Posttranslational modification, protein turnover, chaperones	NP_389884.1	-	yosR	-	2159742	2159984	243	CDS	0.174713	-0.356405	0.706326	0.789186	0.980049	0.263453	0.379331	-1.28023	0.789186	1.97253	0.379331	0.56121
putative efflux transporter	COG0477	Carbohydrate transport and metabolism|Amino acid transport and metabolism|Inorganic ion transport and metabolism|General function prediction only			yubD	-	3191843	3193378	1536	CDS	6.11195	-2.21173	9.427e-09	1.05732e-07	0.978762	0.00767512	0.022004	-4.6323	1.05732e-07	1.97077	0.022004	80.0054
membrane protease	COG0501	Posttranslational modification, protein turnover, chaperones	NP_389232.1	yes	htpX	+	1414997	1415893	897	CDS	9.42324	-1.28507	5.38026e-05	0.000265138	0.97786	0.00195455	0.00701961	-2.43695	0.000265138	1.96954	0.00701961	690.813
cell-shape determining protein	COG1077	Cell cycle control, cell division, chromosome partitioning	NP_390681.2	-	mreB	-	2860735	2861748	1014	CDS	9.30183	1.186	0.000301735	0.00121078	0.977838	0.00278148	0.00954681	2.27521	0.00121078	1.96951	0.00954681	362.926
phosphotransferase system (PTS) maltose-specific enzyme IICB component	COG1263	Carbohydrate transport and metabolism	NP_388701.1	1	malP	+	892215	893798	1584	CDS	4.33516	0.415347	0.377329	0.492977	0.976938	0.03893	0.0832764	1.33362	0.492977	1.96828	0.0832764	10.3791
energizing coupling factor of ABC influx transporter (ATP-binding protein)	COG1122	Inorganic ion transport and metabolism|General function prediction only	NP_388026.2	-	ecfA	+	150443	151288	846	CDS	8.11865	-1.50237	0.0010634	0.00368377	0.976545	0.0310098	0.0692952	-2.83308	0.00368377	1.96775	0.0692952	291.781
putative general stress protein	COG3871	Function unknown	NP_388303.1	-	ydaG	+	473803	474225	423	CDS	9.33117	0.541656	0.262671	0.369775	0.976389	0.0448358	0.0932771	1.45564	0.369775	1.96753	0.0932771	406.163
putative acetate Na+-dependent symporter	COG4147	Energy production and conversion	NP_391703.2	yes	ywcA	+	3924225	3925766	1542	CDS	2.87827	-1.89729	3.09106e-05	0.000162886	0.975543	0.016333	0.0410575	-3.72513	0.000162886	1.96638	0.0410575	7.30867
conserved hypothetical protein	undefined	undefined	NP_389618.1	-	ymzA	+	1868144	1868374	231	CDS	5.20053	2.52111	9.46817e-11	1.51233e-09	0.97513	0.0108319	0.0293304	5.74023	1.51233e-09	1.96582	0.0293304	11.6107
putative ABC transporter (ATP-binding protein)	COG1132	Defense mechanisms	NP_389316.1	yes	yknV	+	1501658	1503472	1815	CDS	2.44922	-0.183413	0.632103	0.725813	0.974528	0.00810507	0.0230251	-1.13557	0.725813	1.965	0.0230251	4.51835
putative thioredoxin or thiol-disulfide isomerase	COG0526	Posttranslational modification, protein turnover, chaperones	NP_388336.1	-	ydbP	-	507753	508073	321	CDS	6.80997	-0.18536	0.512551	0.620656	0.974264	0.000610232	0.0025828	-1.1371	0.620656	1.96464	0.0025828	81.1665
conserved hypothetical protein	undefined	undefined			yuzF	-	3264265	3264501	237	CDS	4.92112	1.17885	0.000206017	0.000867383	0.974144	0.00227196	0.00802616	2.26396	0.000867383	1.96448	0.00802616	17.9167
putative PLP-dependent transcriptional regulator	COG1167	Transcription|Amino acid transport and metabolism	NP_388968.2	-	yisV	+	1166737	1168191	1455	CDS	4.31112	0.287257	0.394824	0.510313	0.973332	0.00397109	0.0127372	1.22032	0.510313	1.96337	0.0127372	14.4319
ydaO-yuaA	undefined	undefined			BSU_misc_RNA_52	+	3188193	3188341	149	No_CDS	6.57938	-1.57753	2.25476e-08	2.34784e-07	0.973237	0.000392287	0.00177742	-2.98459	2.34784e-07	1.96324	0.00177742	103.419
conserved hypothetical protein	undefined	undefined	NP_389750.1	-	yoaP	-	2039610	2040365	756	CDS	1.11556	0.546808	0.294141	0.404641	0.972536	0.060061	0.118648	1.46085	0.404641	1.96229	0.118648	1.21196
L-lactate dehydrogenase	COG0039	Energy production and conversion	NP_388187.2	1	ldh	+	329774	330739	966	CDS	12.5822	-1.28226	0.00268733	0.00813533	0.972531	0.0219233	0.0522924	-2.43219	0.00813533	1.96228	0.0522924	6031.62
extracellular neutral metalloprotease	COG3227	Posttranslational modification, protein turnover, chaperones	NP_389353.1	-	nprE	-	1540036	1541601	1566	CDS	4.57383	-0.423587	0.303363	0.414842	0.971707	0.0178566	0.0441309	-1.34126	0.414842	1.96116	0.0441309	21.1904
putative oxidoreductase	COG0604	Energy production and conversion|General function prediction only	NP_388913.1	-	yhfP	+	1106524	1107516	993	CDS	7.32957	-0.394605	0.244662	0.349457	0.971156	0.00439644	0.0139362	-1.31458	0.349457	1.96041	0.0139362	129.244
putative glucose 1-dehydrogenase	COG1028	Lipid transport and metabolism|Secondary metabolites biosynthesis, transport and catabolism|General function prediction only	NP_388165.1	-	ycdF	+	305658	306434	777	CDS	6.89987	-0.0707827	0.901724	0.933159	0.969474	0.0935289	0.168467	-1.05029	0.933159	1.95813	0.168467	88.3888
hypothetical protein	undefined	undefined	NP_388520.3	-	yebD	+	697157	697324	168	CDS	2.43543	3.13825	0.000480928	0.00183899	0.968993	0.27942	0.396481	8.80458	0.00183899	1.95747	0.396481	1.12301
putative integral inner membrane protein	undefined	undefined	NP_388519.2	yes	yebC	+	696195	696998	804	CDS	10.5296	4.86088	9.10095e-36	5.33706e-33	0.968747	0.00391852	0.0126161	29.0583	5.33706e-33	1.95714	0.0126161	133.494
T-box riboswitch specific of alanine tRNA	undefined	undefined			tboA	-	2800890	2801097	208	No_CDS	6.72479	-0.910453	0.00438974	0.0123003	0.96763	0.00232551	0.00818014	-1.87964	0.0123003	1.95562	0.00818014	96.4552
organic hydroperoxide resistance reductase B	COG1764	Defense mechanisms	NP_389199.1	-	ohrB	+	1382020	1382430	411	CDS	8.40807	1.37736	0.00104715	0.00363053	0.966646	0.0203796	0.049502	2.59792	0.00363053	1.95429	0.049502	184.999
ribosome-associated sigma 54 modulation protein	COG1544	Translation, ribosomal structure and biogenesis	NP_391411.1	-	hpf	-	3631003	3631572	570	CDS	10.1235	1.25997	0.00306437	0.00910469	0.966303	0.0223356	0.0530906	2.39492	0.00910469	1.95383	0.0530906	574.081
efflux transporter (ATP-binding and permease protein)	COG1132	Defense mechanisms	NP_391362.1	yes	bmrA	-	3577745	3579514	1770	CDS	7.30139	-0.0444334	0.881103	0.919762	0.964924	0.00125865	0.00479292	-1.03128	0.919762	1.95196	0.00479292	119.833
transcriptional regulator of gapA	COG2390	Transcription	NP_391275.1	-	cggR	-	3482752	3483774	1023	CDS	11.4806	2.42536	1.05987e-11	1.99576e-10	0.964082	0.0047945	0.0150125	5.37163	1.99576e-10	1.95082	0.0150125	1005.51
conserved hypothetical protein	undefined	undefined	YP_003097754.1	-	ypzG	+	2329870	2330022	153	CDS	2.04662	0.899775	0.0625814	0.116454	0.963657	0.0504901	0.102859	1.86578	0.116454	1.95025	0.102859	2.09899
transcriptional regulator of stress	COG1393	Inorganic ion transport and metabolism	NP_390357.2	-	mgsR	-	2564026	2564406	381	CDS	8.62514	0.941836	0.056067	0.106504	0.962868	0.0509163	0.103522	1.92097	0.106504	1.94918	0.103522	262.998
ornithine aminotransferase	COG4992	Amino acid transport and metabolism	NP_391914.1	-	rocD	-	4144301	4145506	1206	CDS	6.45685	-0.411661	0.161926	0.252802	0.961364	0.00110533	0.00430493	-1.33022	0.252802	1.94715	0.00430493	70.2471
component of the influx ECF transporters	COG0619	Coenzyme transport and metabolism	NP_388028.2	yes	ecfT	+	152130	152927	798	CDS	8.20812	-1.20334	0.00636397	0.0168325	0.959487	0.0285709	0.0647976	-2.30273	0.0168325	1.94462	0.0647976	291.662
putative cytochrome bd menaquinol oxidase subunit I	COG1271	Energy production and conversion			ythA	+	3139431	3140762	1332	CDS	1.53156	1.92273	0.000492864	0.00187682	0.958105	0.107248	0.188223	3.7914	0.00187682	1.94276	0.188223	1.07552
putative general stress protein	COG1734	Translation, ribosomal structure and biogenesis	NP_389805.2	-	yocK	-	2097126	2097617	492	CDS	6.37961	1.56145	0.000152199	0.000665366	0.957679	0.0189276	0.0464423	2.95149	0.000665366	1.94218	0.0464423	42.9148
intracellular serine protease	COG1404	Posttranslational modification, protein turnover, chaperones	NP_389202.1	-	isp	-	1386024	1386983	960	CDS	2.59943	0.245922	0.606042	0.703962	0.956179	0.0445611	0.0928546	1.18585	0.703962	1.94016	0.0928546	4.74257
GTPase	COG1660	Signal transduction mechanisms	NP_391357.1	-	yvcJ	-	3571501	3572388	888	CDS	6.98131	0.344005	0.219403	0.319606	0.955865	0.000698689	0.00288834	1.26928	0.319606	1.93974	0.00288834	90.3561
conserved hypothetical protein	COG3361	Function unknown	NP_390270.3	-	yqjF	+	2484911	2485639	729	CDS	4.22868	0.585482	0.0726879	0.131911	0.954553	0.00353083	0.0116045	1.50054	0.131911	1.93798	0.0116045	12.2978
phage toxin ribonuclease	COG5444	Defense mechanisms	NP_389781.1	-	rttL	-	2071754	2073556	1803	CDS	4.72896	0.891803	0.0198912	0.0449881	0.954177	0.0131076	0.0339772	1.85549	0.0449881	1.93747	0.0339772	15.6702
5'3'-exonuclease	COG0258	Replication, recombination and repair	NP_390083.1	-	ypcP	-	2310995	2311885	891	CDS	7.07445	1.50545	2.88632e-05	0.00015308	0.953869	0.00745939	0.0215185	2.83913	0.00015308	1.93706	0.0215185	67.5769
conserved hypothetical protein	COG4980	General function prediction only			ytxH	-	3047107	3047562	456	CDS	9.32661	0.593852	0.142838	0.230212	0.953491	0.0192866	0.0471539	1.50927	0.230212	1.93655	0.0471539	449.369
putative permease	undefined	undefined	NP_389317.1	yes	yknW	+	1503582	1504277	696	CDS	6.45964	-3.09225	7.43076e-10	1.03052e-08	0.952347	0.0395993	0.0843129	-8.52823	1.03052e-08	1.93502	0.0843129	102.097
conserved hypothetical protein	COG3870	Function unknown	NP_387910.1	-	yaaQ	+	39871	40200	330	CDS	6.44851	1.26119	8.49669e-06	5.06961e-05	0.95205	0.000764604	0.00312619	2.39694	5.06961e-05	1.93462	0.00312619	55.0678
putative transcriptional regulator (DeoR family)	COG1349	Transcription|Carbohydrate transport and metabolism			yulB	-	3201027	3201803	777	CDS	4.32844	0.00127226	0.99701	0.99847	0.950301	0.005124	0.015815	1.00088	0.99847	1.93228	0.015815	15.7152
epoxyqueuosine reductase	COG1600	Translation, ribosomal structure and biogenesis	NP_388772.2	-	queG	+	967935	969095	1161	CDS	5.33045	0.226603	0.438381	0.55218	0.94991	0.00119941	0.00460147	1.17008	0.55218	1.93175	0.00460147	31.2275
small untranslated RNA controlled by sporulation	undefined	undefined			surA	-	1914992	1915272	281	No_CDS	-0.0309893	0.650146	0.406799	0.522827	0.948698	0.231796	0.344536	1.56933	0.522827	1.93013	0.344536	0.555478
transcriptional regulator (ArsR family)	COG0640	Transcription	NP_390458.1	-	arsR	-	2657317	2657634	318	CDS	2.11424	-0.165612	0.787881	0.850671	0.948146	0.120993	0.207093	-1.12164	0.850671	1.92939	0.207093	3.8773
conserved hypothetical protein	undefined	undefined	YP_003097762.1	1	yqzM	+	2637369	2637503	135	CDS	3.28248	-0.119198	0.753659	0.821796	0.948125	0.0112772	0.0301963	-1.08613	0.821796	1.92936	0.0301963	7.54863
putative glycosyltransferase	COG0463	Cell wall/membrane/envelope biogenesis	NP_389222.1	yes	ykoT	+	1403479	1404492	1014	CDS	2.20702	1.68734	4.4037e-05	0.000223451	0.946027	0.0319335	0.0708578	3.22062	0.000223451	1.92656	0.0708578	2.07811
conserved hypothetical protein	undefined	undefined	NP_390804.1	yes	ytpI	+	2996980	2997282	303	CDS	4.58853	-0.598353	0.0891063	0.156297	0.944974	0.00651224	0.0192046	-1.51399	0.156297	1.92515	0.0192046	20.8789
glucarate dehydratase	COG4948	Cell wall/membrane/envelope biogenesis|General function prediction only	NP_388131.2	-	gudD	+	271800	273167	1368	CDS	2.30489	-1.03518	0.0272725	0.0586146	0.942779	0.02884	0.0653356	-2.04937	0.0586146	1.92223	0.0653356	4.19651
conserved hypothetical protein	undefined	undefined			yrzM	-	2714231	2714548	318	CDS	2.3675	0.874757	0.0505091	0.09748	0.941873	0.0365233	0.079076	1.8337	0.09748	1.92102	0.079076	3.65676
conserved hypothetical protein	COG3872	Function unknown	NP_390329.2	yes	yqhQ	+	2541051	2542007	957	CDS	7.51212	0.256087	0.377526	0.493078	0.941659	0.0012733	0.00484421	1.19424	0.493078	1.92074	0.00484421	133.964
putative phosphatase	COG0561	Coenzyme transport and metabolism|General function prediction only	NP_388995.1	-	yitU	-	1190490	1191302	813	CDS	6.40604	1.11311	0.000406897	0.00158174	0.940073	0.00284351	0.00970291	2.16311	0.00158174	1.91863	0.00970291	46.0473
putative acyl-CoA O-methyltransferase	COG4122	General function prediction only	NP_390614.1	-	yrrM	-	2795082	2795735	654	CDS	8.27524	2.58442	8.188e-12	1.57064e-10	0.939957	0.00924932	0.0257588	5.99775	1.57064e-10	1.91847	0.0257588	99.8312
hypothetical protein	undefined	undefined	YP_003097717.1	-	ykzN	+	1382457	1382627	171	CDS	2.91807	-0.0867462	0.825306	0.878828	0.938551	0.0147383	0.0376716	-1.06197	0.878828	1.9166	0.0376716	5.93997
tRNA-Asp	undefined	undefined			trnE-Asp	+	640405	640481	77	tRNA	2.96944	-0.773514	0.0565886	0.107247	0.938366	0.0144502	0.0369584	-1.70943	0.107247	1.91636	0.0369584	6.60529
conserved hypothetical protein, putative PBSX prophage protein	undefined	undefined	NP_389152.1	-	xkdQ	+	1339632	1340609	978	CDS	3.51159	1.27453	0.00110966	0.00382787	0.936682	0.017735	0.0438567	2.4192	0.00382787	1.91412	0.0438567	6.49031
dipeptide ABC transporter (permease)	COG0601	Amino acid transport and metabolism|Inorganic ion transport and metabolism	NP_389176.1	yes	dppB	+	1361242	1362168	927	CDS	1.67158	-0.831264	0.0712498	0.129646	0.936376	0.0226212	0.0535002	-1.77924	0.129646	1.91372	0.0535002	2.83869
Mrp family regulator	COG0489	Cell cycle control, cell division, chromosome partitioning	NP_388035.1	-	salA	+	157421	158479	1059	CDS	10.0049	0.217449	0.50601	0.614548	0.934867	0.00456018	0.0143665	1.16268	0.614548	1.91171	0.0143665	627.666
cytochrome caa3 oxidase (subunit III)	COG1845	Energy production and conversion	NP_389374.1	yes	ctaE	+	1563437	1564060	624	CDS	4.17416	-1.13597	0.00158307	0.00521549	0.934364	0.00697743	0.020357	-2.19766	0.00521549	1.91105	0.020357	17.2767
putative small-conductance mechanosensitive channel	COG0668	Cell wall/membrane/envelope biogenesis	NP_389304.2	yes	ykuT	-	1491221	1492024	804	CDS	6.54225	0.146687	0.643358	0.735036	0.934115	0.00338781	0.0112425	1.10702	0.735036	1.91072	0.0112425	78.5565
sigma-Y antisigma factor	undefined	undefined	NP_391748.1	yes	yxlC	-	3969999	3970319	321	CDS	0.963828	0.15036	0.802916	0.860429	0.933999	0.101198	0.17963	1.10985	0.860429	1.91056	0.17963	0.855561
phosphate ABC transporter (permease)	COG0573	Inorganic ion transport and metabolism	NP_390377.2	yes	pstC	-	2579717	2580646	930	CDS	0.587365	-0.388396	0.597619	0.695917	0.933956	0.167183	0.266833	-1.30894	0.695917	1.91051	0.266833	0.756022
glutamate 5-kinase	COG0263	Amino acid transport and metabolism	NP_389729.1	-	proJ	-	2015733	2016848	1116	CDS	4.18282	1.00267	0.0313349	0.0658505	0.933813	0.0456238	0.0944456	2.0037	0.0658505	1.91032	0.0944456	10.5539
putative lipoprotein	undefined	undefined	NP_390767.2	-	yscB	+	2953795	2954460	666	CDS	0.364671	-3.01167	0.00104115	0.00361606	0.933233	0.133667	0.223961	-8.06495	0.00361606	1.90955	0.223961	1.05464
putative enzyme	COG1587	Coenzyme transport and metabolism	NP_389105.1	-	yjjA	+	1294138	1294950	813	CDS	6.54513	-0.669443	0.0264061	0.0571499	0.932974	0.00192791	0.00693607	-1.59046	0.0571499	1.90921	0.00693607	83.468
thiol-disulfide isomerase	COG0526	Posttranslational modification, protein turnover, chaperones	NP_389306.2	-	ykuV	+	1492875	1493321	447	CDS	3.59962	0.561622	0.113781	0.191502	0.932907	0.00904204	0.0253074	1.47593	0.191502	1.90912	0.0253074	8.06821
UTP-glucose-1-phosphate uridylyltransferase	COG1210	Cell wall/membrane/envelope biogenesis	NP_391447.1	-	gtaB	+	3665629	3666507	879	CDS	10.1698	0.294601	0.383708	0.499421	0.932213	0.00622758	0.0185248	1.22655	0.499421	1.9082	0.0185248	797.632
membrane-bound transcriptional regulator	COG1316	Cell wall/membrane/envelope biogenesis	NP_391445.1	1	lytR	+	3663281	3664201	921	CDS	6.69134	0.100486	0.795729	0.857833	0.931725	0.017145	0.0426805	1.07213	0.857833	1.90755	0.0426805	77.8943
N-acetylglucosaminidase lipoprotein	COG1472	Carbohydrate transport and metabolism	NP_388047.1	-	nagZ	-	186452	188380	1929	CDS	3.75107	-0.0439548	0.894736	0.928732	0.931102	0.00453681	0.0143369	-1.03094	0.928732	1.90673	0.0143369	9.8136
conserved hypothetical protein	undefined	undefined	NP_388730.1	-	yfhD	-	924210	924401	192	CDS	4.6731	0.405599	0.466399	0.578594	0.93107	0.0963187	0.173036	1.32464	0.578594	1.90669	0.173036	15.2684
putative oxidoreductase	COG2905	Signal transduction mechanisms	NP_389378.2	-	ylbB	+	1565849	1566295	447	CDS	5.04927	2.32963	4.45346e-08	4.44804e-07	0.929754	0.026258	0.0604877	5.02675	4.44804e-07	1.90495	0.0604877	11.6374
2-methylisocitrate lyase	COG2513	Carbohydrate transport and metabolism	NP_390292.1	-	mmgF	-	2507298	2508203	906	CDS	4.23182	1.33063	9.08594e-06	5.35888e-05	0.92896	0.00242272	0.00845687	2.51513	5.35888e-05	1.9039	0.00845687	8.70632
conserved hypothetical protein	undefined	undefined	NP_388755.1	-	ygxA	+	945520	946404	885	CDS	6.42029	0.121053	0.671469	0.757872	0.92616	0.00124892	0.00476915	1.08753	0.757872	1.90021	0.00476915	61.5764
component of the GerA germination receptor	undefined	undefined			gerAA	+	3390782	3392230	1449	CDS	0.918038	0.65235	0.33478	0.447791	0.925473	0.170887	0.27116	1.57173	0.447791	1.89931	0.27116	1.00686
hypothetical protein, phage SPbeta	undefined	undefined	NP_390003.1	-	yomW	+	2239083	2239589	507	CDS	2.22656	0.933142	0.149917	0.237846	0.925279	0.15889	0.257055	1.90943	0.237846	1.89905	0.257055	1.48543
nitrate reductase (beta subunit)	COG1140	Energy production and conversion|Inorganic ion transport and metabolism	NP_391608.1	-	narH	-	3824806	3826269	1464	CDS	2.22713	-1.01821	0.0580519	0.109767	0.924938	0.0690709	0.132308	-2.02541	0.109767	1.8986	0.132308	4.48233
putative sugar transporter	COG2814	Carbohydrate transport and metabolism	NP_389645.2	yes	yncC	+	1896424	1897839	1416	CDS	4.44043	0.942544	0.00583152	0.015646	0.922634	0.00745606	0.0215185	1.92191	0.015646	1.89557	0.0215185	12.3476
putative flavoenzyme	COG0069	Amino acid transport and metabolism	NP_388541.1	1	yerD	-	716780	718357	1578	CDS	6.86187	0.0463203	0.936909	0.95815	0.92169	0.118056	0.203621	1.03263	0.95815	1.89433	0.203621	79.4103
putative phage protein	undefined	undefined	YP_003097682.1	yes	ydzM	+	556562	556738	177	CDS	1.31427	1.63339	0.00495868	0.0135975	0.921254	0.14311	0.237089	3.10241	0.0135975	1.89376	0.237089	0.917904
putative phage protein	COG4282	Cell wall/membrane/envelope biogenesis	NP_389782.2	-	yobM	-	2073658	2074215	558	CDS	4.03595	3.02579	3.2409e-18	1.54696e-16	0.920705	0.0125804	0.0329226	8.1443	1.54696e-16	1.89304	0.0329226	4.08785
holin regulator of murein hydrolases	COG1380	General function prediction only	NP_391711.1	yes	cidA	+	3933209	3933595	387	CDS	7.47905	-0.979408	0.00250865	0.00767364	0.919011	0.00439045	0.013928	-1.97166	0.00767364	1.89082	0.013928	186.86
putative phage protein	undefined	undefined	NP_389631.1	-	ynzG	+	1881098	1881349	252	CDS	0.626017	1.99165	0.00885726	0.0221701	0.91848	0.269918	0.387147	3.97691	0.0221701	1.89012	0.387147	0.461965
arabinose/arabinan permease	COG0395	Carbohydrate transport and metabolism	NP_390751.2	yes	araQ	-	2939851	2940696	846	CDS	4.62595	0.0449734	0.967196	0.979606	0.9184	1.05998e-06	1.07703e-05	1.03166	0.979606	1.89002	1.07703e-05	1.22255
cytochrome caa3 oxidase (subunit I)	COG0843	Energy production and conversion	NP_389373.2	yes	ctaD	+	1561569	1563437	1869	CDS	6.07994	-0.792747	0.0137397	0.0325644	0.917311	0.00412652	0.0131721	-1.73237	0.0325644	1.88859	0.0131721	64.2018
phosphatase	COG0406	Carbohydrate transport and metabolism	NP_388915.1	-	phoE	-	1108736	1109317	582	CDS	5.49476	0.139686	0.624014	0.718132	0.916333	0.00134191	0.00507711	1.10167	0.718132	1.88731	0.00507711	35.6307
glutamate dehydrogenase	COG0334	Amino acid transport and metabolism	NP_391659.2	-	rocG	-	3880740	3882014	1275	CDS	3.97507	-1.33564	0.001624	0.00532044	0.91616	0.0244358	0.0571236	-2.52388	0.00532044	1.88709	0.0571236	14.7251
transcriptional repressor of de novo NAD biosynthesis	COG1827	Transcription|Coenzyme transport and metabolism	NP_390667.2	-	niaR	+	2850716	2851258	543	CDS	5.58068	-0.0137338	0.966005	0.979606	0.915867	0.00458687	0.0144284	-1.00956	0.979606	1.8867	0.0144284	35.3442
Bypass of forespore C, intercompartmental signaling factor	undefined	undefined	NP_390653.1	1	bofC	-	2836909	2837421	513	CDS	6.07536	-0.643416	0.247385	0.352609	0.914938	0.100605	0.178834	-1.56202	0.352609	1.88549	0.178834	62.4459
translocase binding subunit (ATPase)	COG0653	Intracellular trafficking, secretion, and vesicular transport	NP_391410.1	-	secA	-	3628310	3630835	2526	CDS	10.5673	0.921676	0.00181506	0.00583462	0.914622	0.00196844	0.00705686	1.89432	0.00583462	1.88507	0.00705686	892.862
putative ATP-dependent RNA helicase	COG0513	Replication, recombination and repair	NP_388624.1	-	yfmL	+	816113	817243	1131	CDS	7.50027	0.330759	0.325462	0.437179	0.91378	0.00695528	0.0203068	1.25768	0.437179	1.88397	0.0203068	119.684
antagonist of SinR	undefined	undefined	NP_390340.1	-	sinI	+	2552446	2552619	174	CDS	2.76098	0.433057	0.233435	0.336229	0.911148	0.0120452	0.0318592	1.35009	0.336229	1.88054	0.0318592	4.54349
chaperonin large subunit	COG0459	Posttranslational modification, protein turnover, chaperones	NP_388484.1	-	groEL	+	650234	651868	1635	CDS	11.4881	-0.807666	0.0124417	0.0299023	0.911131	0.00487206	0.0152206	-1.75038	0.0299023	1.88052	0.0152206	2219.75
alternative sigma factor	COG1191	Transcription	NP_391203.2	-	sigO	-	3409462	3409992	531	CDS	1.20082	0.590272	0.258588	0.365405	0.91045	0.0830243	0.152832	1.50553	0.365405	1.87963	0.152832	1.21196
conserved hypothetical protein	undefined	undefined	NP_389637.1	yes	ynaG	+	1885365	1885640	276	CDS	1.673	-0.552246	0.20459	0.302755	0.90861	0.0218105	0.0521142	-1.46637	0.302755	1.87724	0.0521142	2.78635
hypothetical protein	COG0346	Secondary metabolites biosynthesis, transport and catabolism	NP_390748.1	-	ysfE	-	2935967	2936209	243	CDS	5.4885	0.457917	0.176132	0.269082	0.90817	0.00765116	0.021979	1.37356	0.269082	1.87666	0.021979	29.1228
repressor of copper utilisation proteins	COG1937	Transcription	NP_391232.1	-	csoR	-	3443896	3444201	306	CDS	5.24167	0.0985518	0.749107	0.81901	0.906683	0.00332094	0.0110474	1.0707	0.81901	1.87473	0.0110474	31.8907
putative oxidoreductase	COG1028	Lipid transport and metabolism|Secondary metabolites biosynthesis, transport and catabolism|General function prediction only	NP_391880.2	yes	yxnA	+	4108058	4109128	1071	CDS	6.38706	0.0832885	0.853236	0.900162	0.906652	0.0455164	0.0944456	1.05943	0.900162	1.87469	0.0944456	64.2432
hypoxanthine-guanine phosphoribosyltransferase	COG0634	Nucleotide transport and metabolism	NP_387949.1	-	hprT	+	76344	76886	543	CDS	8.43072	-0.302815	0.309427	0.420236	0.906416	0.00249127	0.00865934	-1.23355	0.420236	1.87438	0.00865934	291.917
putative phage receptor protein	COG3391	General function prediction only	NP_388564.2	1	yeeG	+	749775	750797	1023	CDS	1.13818	0.470509	0.335941	0.448905	0.904075	0.0618646	0.121343	1.3856	0.448905	1.87134	0.121343	1.46912
ABC transporter (ATP-binding protein) involved in the signalling pathway that activates KinA during	COG1132	Defense mechanisms	NP_388853.1	yes	yheH	+	1047072	1049093	2022	CDS	6.18779	-1.33767	6.89704e-05	0.000328831	0.902546	0.00624066	0.0185368	-2.52742	0.000328831	1.86936	0.0185368	78.6416
hypothetical protein	undefined	undefined	NP_388731.1	-	yfhE	-	924468	924578	111	CDS	2.66809	-0.113683	0.844047	0.892993	0.901918	0.114071	0.197912	-1.08199	0.892993	1.86855	0.197912	3.9886
putative sugar permease	COG2814	Carbohydrate transport and metabolism	NP_391713.1	yes	ywbF	+	3934358	3935557	1200	CDS	5.79882	-0.800519	0.0439934	0.0868906	0.900896	0.0226919	0.0536271	-1.74173	0.0868906	1.86723	0.0536271	49.421
conserved hypothetical protein	COG3315	Secondary metabolites biosynthesis, transport and catabolism	NP_389352.1	-	yktD	-	1538770	1539684	915	CDS	3.76544	0.592113	0.0555432	0.10562	0.900035	0.00375163	0.0121743	1.50745	0.10562	1.86611	0.0121743	9.62423
aminopeptidase	COG2309	Amino acid transport and metabolism	NP_389328.1	-	ampS	-	1514997	1516229	1233	CDS	7.35124	-0.0949234	0.754073	0.821796	0.898181	0.00321105	0.0107428	-1.06801	0.821796	1.86372	0.0107428	128.913
conserved hypothetical protein	undefined	undefined			yuiA	-	3299718	3299861	144	CDS	2.83458	-0.193228	0.686066	0.770534	0.897514	0.0572765	0.113915	-1.14332	0.770534	1.86285	0.113915	6.68248
nitroreductase	COG2249	General function prediction only	NP_391480.1	-	ywrO	-	3708172	3708699	528	CDS	6.78072	0.450308	0.141758	0.228921	0.896687	0.00361029	0.011809	1.36633	0.228921	1.86179	0.011809	80.4276
conserved hypothetical protein	undefined	undefined	NP_391925.1	-	yycD	+	4159005	4159205	201	CDS	2.89027	0.703259	0.14543	0.233339	0.896419	0.0660775	0.127706	1.62818	0.233339	1.86144	0.127706	4.89592
serine/threonine protein kinase/phosphorylase	COG1493	Signal transduction mechanisms	NP_391380.1	-	hprK	-	3594242	3595174	933	CDS	7.53848	-0.373093	0.216366	0.316605	0.895005	0.0031406	0.0105587	-1.29513	0.316605	1.85962	0.0105587	151.95
8-amino-7-oxononanoate synthase	COG0156	Coenzyme transport and metabolism			bioF	-	3092184	3093353	1170	CDS	3.2055	1.46477	1.83155e-05	0.000101739	0.894433	0.0130417	0.0338837	2.7602	0.000101739	1.85888	0.0338837	3.60957
putative transcriptional regulator	COG1846	Transcription	NP_391385.1	-	yvnA	+	3602074	3602547	474	CDS	2.24979	-0.168521	0.716341	0.796906	0.894179	0.0469786	0.0965201	-1.12391	0.796906	1.85855	0.0965201	3.77262
ribose ABC transporter (ATP-binding protein)	COG1129	Carbohydrate transport and metabolism	NP_391475.1	-	rbsA	+	3703682	3705163	1482	CDS	8.66277	-0.0870005	0.885189	0.922259	0.893762	0.140958	0.234265	-1.06216	0.922259	1.85802	0.234265	167.631
NADP+-dependent 6-P-gluconate dehydrogenase	COG0362	Carbohydrate transport and metabolism	NP_390267.2	-	gndA	-	2480750	2482159	1410	CDS	10.6064	0.424742	0.138049	0.224078	0.892107	0.0019587	0.00702838	1.34233	0.224078	1.85588	0.00702838	1001.49
putative alkylated deoxynucleotide triphosphohydrolase	undefined	undefined	NP_388033.1	-	ybaK	+	156109	156552	444	CDS	0.61292	1.28863	0.139501	0.225898	0.891453	0.325074	0.445254	2.44295	0.225898	1.85504	0.445254	0.461671
small acid-soluble spore protein	undefined	undefined	NP_388692.1	-	sspH	+	885629	885808	180	CDS	3.82859	-0.128952	0.739482	0.812955	0.890939	0.0201481	0.0490557	-1.0935	0.812955	1.85438	0.0490557	8.15394
putative PTS system EIIBC component ybbF	COG1263	Carbohydrate transport and metabolism	NP_388049.3	yes	ybbF	-	189790	191157	1368	CDS	3.82745	-1.17635	0.000767821	0.00277701	0.890269	0.00736846	0.0213011	-2.26005	0.00277701	1.85352	0.0213011	13.7399
conserved hypothetical protein	undefined	undefined	NP_391674.2	1	ywdI	-	3895805	3896122	318	CDS	6.48222	-0.640452	0.0352248	0.0723124	0.890215	0.00335585	0.0111454	-1.55882	0.0723124	1.85345	0.0111454	80.7713
NO-dependent activator of the ResDE regulon	COG1959	Transcription	NP_388819.1	-	nsrR	-	1013411	1013851	441	CDS	5.55179	1.01047	0.000745346	0.00270287	0.888733	0.00311538	0.0104886	2.01456	0.00270287	1.85155	0.0104886	30.9479
uric acid permease	COG2233	Nucleotide transport and metabolism			pucJ	+	3330502	3331851	1350	CDS	2.29989	-0.820404	0.0639265	0.118527	0.887583	0.029918	0.0672951	-1.7659	0.118527	1.85007	0.0672951	3.9886
stress response protein, UspA family	COG0589	Signal transduction mechanisms	NP_388850.2	-	nhaX	-	1044373	1044873	501	CDS	7.75522	1.14341	0.00651964	0.0171339	0.886645	0.0341956	0.0749854	2.20902	0.0171339	1.84887	0.0749854	121.064
putative aminohydrolase	COG1834	Amino acid transport and metabolism	NP_389185.2	-	ykgA	-	1371015	1371875	861	CDS	6.53509	0.42788	0.475204	0.586681	0.886558	0.141323	0.234681	1.34526	0.586681	1.84876	0.234681	68.5547
alpha-L-arabinofuranosidase	COG3534	Carbohydrate transport and metabolism	NP_390750.2	-	abfA	-	2938330	2939832	1503	CDS	6.49849	0.901587	0.372302	0.487808	0.886	3.67714e-07	4.18134e-06	1.86812	0.487808	1.84805	4.18134e-06	4.27575
squalene-hopene cyclase	COG1657	Lipid transport and metabolism	NP_389814.2	yes	sqhC	+	2102168	2104066	1899	CDS	2.42141	0.589029	0.241862	0.346426	0.884988	0.0801067	0.148125	1.50423	0.346426	1.84675	0.148125	3.71454
two-component sensor histidine kinase	COG2205	Signal transduction mechanisms			kinB	+	3230067	3231353	1287	CDS	4.04593	-1.97554	8.1638e-08	7.81175e-07	0.884333	0.00913735	0.0254815	-3.93276	7.81175e-07	1.84591	0.0254815	19.4875
FMNH2-dependent aliphatic sulfonate monooxygenase	COG2141	Coenzyme transport and metabolism|General function prediction only	NP_388766.2	-	ssuD	+	964027	965157	1131	CDS	1.513	0.153952	0.751916	0.820909	0.882326	0.0618983	0.121343	1.11261	0.820909	1.84334	0.121343	2.0615
conserved hypothetical protein	COG2828	Energy production and conversion	NP_390565.2	-	yraM	+	2746608	2747711	1104	CDS	2.0104	0.651469	0.136077	0.222194	0.879559	0.045912	0.0948508	1.57077	0.222194	1.83981	0.0948508	2.69622
DNA-protecting protein, ferritin	COG0783	Inorganic ion transport and metabolism|Defense mechanisms			dps	-	3136238	3136675	438	CDS	9.74688	-0.932562	0.0428698	0.0850148	0.877471	0.0564192	0.112373	-1.90866	0.0850148	1.83715	0.112373	839.108
conserved hypothetical protein	undefined	undefined	NP_388685.1	-	yfjM	+	877599	878051	453	CDS	4.47414	-0.651424	0.0357583	0.0731743	0.876583	0.00380092	0.0123147	-1.57072	0.0731743	1.83602	0.0123147	18.3719
putative N-acetylmuramoyl-L-alanine amidase	COG0860	Cell wall/membrane/envelope biogenesis	NP_390299.2	-	yqiI	-	2514979	2515599	621	CDS	1.87936	-0.799679	0.0784749	0.140611	0.874866	0.0354139	0.0770397	-1.74071	0.140611	1.83384	0.0770397	3.46856
putative lyase	COG1413	General function prediction only	NP_390071.1	-	ypgR	-	2302727	2303860	1134	CDS	7.58097	1.03196	0.000441124	0.00170189	0.874676	0.00286301	0.00976135	2.0448	0.00170189	1.8336	0.00976135	111.08
negative regulator of sigma(X) activity	undefined	undefined	NP_390190.2	1	rsiX	-	2413585	2414691	1107	CDS	5.05808	1.07902	0.000564987	0.00211806	0.870009	0.00567994	0.0172457	2.1126	0.00211806	1.82767	0.0172457	18.7264
conserved hypothetical protein	undefined	undefined	NP_390451.2	yes	yqeB	+	2651632	2652354	723	CDS	4.7806	-0.624244	0.0791466	0.141629	0.869308	0.0134571	0.0347648	-1.5414	0.141629	1.82679	0.0347648	26.227
DNA repair exonuclease	COG0420	Replication, recombination and repair	NP_388945.3	-	sbcD	+	1143577	1144752	1176	CDS	5.57479	0.386208	0.217108	0.317275	0.868621	0.00574515	0.01737	1.30695	0.317275	1.82592	0.01737	35.7135
putative PBSX prophage murein binding protein	COG1652	Function unknown	NP_389151.2	-	xkdP	+	1338957	1339616	660	CDS	3.07129	1.64171	0.000199363	0.000842827	0.867376	0.0530008	0.107124	3.12036	0.000842827	1.82434	0.107124	4.27149
conserved hypothetical protein	undefined	undefined	NP_391393.1	yes	yvlA	-	3608447	3608773	327	CDS	6.79312	-0.923011	0.00375302	0.0108189	0.866813	0.00618513	0.0184252	-1.89607	0.0108189	1.82363	0.0184252	114.289
putative transporter component	COG0861	Inorganic ion transport and metabolism	NP_389033.1	yes	yjbE	-	1228135	1228791	657	CDS	2.34831	0.600975	0.134088	0.219821	0.86465	0.0333808	0.0733949	1.51674	0.219821	1.8209	0.0733949	3.23199
putative integral inner membrane protein	COG4846	Energy production and conversion|Posttranslational modification, protein turnover, chaperones	NP_389678.1	yes	yneJ	+	1924471	1924962	492	CDS	6.63053	0.771413	0.00718758	0.0186269	0.864015	0.0026873	0.00927005	1.70694	0.0186269	1.8201	0.00927005	65.5795
putative purine-cytosine permease	COG1457	Nucleotide transport and metabolism	NP_391750.1	yes	yxlA	+	3971060	3972433	1374	CDS	5.80507	-2.81689	6.97738e-09	8.00059e-08	0.862911	0.0560815	0.111935	-7.04644	8.00059e-08	1.8187	0.111935	70.9664
ATP-dependent deoxyribonuclease (subunit A)	COG1074	Replication, recombination and repair	NP_388944.2	-	addA	+	1139807	1143505	3699	CDS	8.25785	0.360195	0.225998	0.327354	0.861167	0.00400494	0.0128239	1.2836	0.327354	1.81651	0.0128239	227.837
putative glycosyl transferase (general stress protein)	COG1442	Cell wall/membrane/envelope biogenesis	NP_391722.1	-	gspA	-	3944560	3945420	861	CDS	8.8633	0.135935	0.795977	0.857833	0.860014	0.10429	0.183975	1.0988	0.857833	1.81506	0.183975	391.735
conserved hypothetical protein	undefined	undefined	NP_390055.1	yes	ypmT	-	2290078	2290272	195	CDS	3.63792	0.156897	0.649391	0.739664	0.85963	0.0126168	0.0329675	1.11489	0.739664	1.81457	0.0329675	9.76155
cytochrome caa3 oxidase (subunit IV)	COG3125	Energy production and conversion	NP_389375.1	yes	ctaF	+	1564063	1564395	333	CDS	2.99016	-1.15866	0.00158708	0.00522033	0.859306	0.0110239	0.0296742	-2.23251	0.00522033	1.81417	0.0296742	7.91679
putative efflux transporter	COG2270	General function prediction only	NP_391789.1	yes	yxiO	+	4014682	4015968	1287	CDS	4.56991	-1.71356	2.62364e-06	1.75981e-05	0.859106	0.0130796	0.0339605	-3.27969	1.75981e-05	1.81391	0.0339605	25.8714
putative permease	undefined	undefined	NP_388574.2	yes	yesK	+	757676	757978	303	CDS	1.96126	-1.55568	0.00248398	0.0076095	0.858992	0.0542159	0.108936	-2.93973	0.0076095	1.81377	0.108936	3.37902
pectin lyase	COG3866	Carbohydrate transport and metabolism	NP_389746.1	1	pelB	+	2034745	2035782	1038	CDS	1.14426	1.53948	0.00383156	0.0109913	0.858628	0.145815	0.24004	2.9069	0.0109913	1.81331	0.24004	0.818365
conserved hypothetical protein	undefined	undefined	NP_389349.1	-	ykzI	+	1537113	1537301	189	CDS	6.36526	1.81852	1.30262e-06	9.38115e-06	0.857534	0.0202764	0.0493097	3.52719	9.38115e-06	1.81194	0.0493097	40.9323
tRNA-Asp	undefined	undefined			trnY-Asp	-	4154895	4154971	77	tRNA	2.59522	-1.8841	0.000221239	0.000924834	0.854807	0.0623027	0.121961	-3.69122	0.000924834	1.80852	0.121961	6.58294
DNA polymerase I	COG0258	Replication, recombination and repair	NP_390787.1	-	polA	-	2973182	2975824	2643	CDS	8.1091	1.00398	0.000369981	0.00145616	0.85362	0.00243581	0.00849533	2.00552	0.00145616	1.80703	0.00849533	155.088
putative stress adaptation protein	COG2310	Signal transduction mechanisms	NP_388172.1	-	yceD	+	312780	313361	582	CDS	9.40851	0.538129	0.106132	0.180552	0.853575	0.0107171	0.0290589	1.45209	0.180552	1.80697	0.0290589	477.968
putative integral inner membrane protein	COG3180	General function prediction only	NP_388938.1	yes	yhjN	-	1130918	1132072	1155	CDS	4.80565	-0.243712	0.585054	0.68501	0.853473	0.0559679	0.1118	-1.18404	0.68501	1.80685	0.1118	18.7281
small regulatory RNA	undefined	undefined			bsrE	-	2069732	2070115	384	No_CDS	4.72853	0.624438	0.0534893	0.102467	0.852114	0.00870226	0.024518	1.54161	0.102467	1.80514	0.024518	16.9469
two-component response regulator [DesK]	COG2197	Signal transduction mechanisms|Transcription	NP_389801.1	-	desR	+	2091705	2092304	600	CDS	3.86319	1.85892	1.96876e-09	2.49437e-08	0.851772	0.00848716	0.0240109	3.62735	2.49437e-08	1.80472	0.0240109	6.08642
conserved hypothetical protein	COG4768	Function unknown			ytxG	-	3047593	3048015	423	CDS	9.22482	0.58422	0.166135	0.257741	0.851757	0.0443083	0.0924685	1.49923	0.257741	1.8047	0.0924685	431.66
short-chain flavodoxin	COG0716	Energy production and conversion	NP_389300.2	-	ykuP	+	1488413	1488868	456	CDS	8.90079	0.922777	0.00279086	0.00840729	0.851752	0.00575052	0.01737	1.89576	0.00840729	1.80469	0.01737	249.491
putative sporulation protein	undefined	undefined	YP_003097746.1	1	yoyG	-	2145820	2145933	114	CDS	0.732296	2.25526	0.000795199	0.0028559	0.850565	0.288288	0.405282	4.77419	0.0028559	1.80321	0.405282	0.414475
putative oxidoreductase	COG1063	Amino acid transport and metabolism|General function prediction only	NP_390574.2	-	adhB	+	2753452	2754588	1137	CDS	1.15911	0.314511	0.531772	0.637164	0.848173	0.0857911	0.1568	1.24359	0.637164	1.80022	0.1568	1.3756
putative serine/threonine-protein kinase	COG0515	Signal transduction mechanisms	NP_387947.2	1	yabT	+	73809	74825	1017	CDS	3.93413	-0.198728	0.657692	0.747023	0.848105	0.0576367	0.114465	-1.14769	0.747023	1.80013	0.114465	12.7295
conserved hypothetical protein	undefined	undefined	NP_389829.1	-	yojF	-	2122325	2122675	351	CDS	7.11011	1.1238	0.000256171	0.00104427	0.84807	0.00568489	0.017248	2.17921	0.00104427	1.80009	0.017248	81.8279
putative transcriptional regulator (AraC/XylS family, cupin family)	COG1917	General function prediction only	NP_388706.1	-	yfiF	+	898961	899905	945	CDS	2.45657	-0.855025	0.0692907	0.126699	0.847354	0.0553641	0.110917	-1.80879	0.126699	1.7992	0.110917	4.42161
putative oxidoreductase	COG1028	Lipid transport and metabolism|Secondary metabolites biosynthesis, transport and catabolism|General function prediction only	NP_389260.1	-	ykvO	+	1442872	1443618	747	CDS	2.48074	0.856497	0.0263918	0.0571499	0.846429	0.0316102	0.0703687	1.81064	0.0571499	1.79804	0.0703687	3.24861
putative spore germination integral inner membrane protein	undefined	undefined	NP_388657.1	yes	yfkT	-	846182	847258	1077	CDS	1.39111	-0.121861	0.829403	0.88159	0.846117	0.121484	0.207702	-1.08814	0.88159	1.79766	0.207702	1.92505
conserved hypothetical protein	undefined	undefined			ytxJ	-	3046757	3047083	327	CDS	8.21799	0.52867	0.178913	0.272496	0.845997	0.03223	0.0712845	1.4426	0.272496	1.79751	0.0712845	210.677
rhamnogalacturonan endolyase	undefined	undefined	NP_388586.1	1	rhgW	+	770234	772096	1863	CDS	2.00406	-0.586943	0.246397	0.351689	0.845659	0.0731235	0.13884	-1.50206	0.351689	1.79708	0.13884	2.50317
putative metal-dependent hydrolase	COG0491	General function prediction only	NP_390260.1	-	yqjP	-	2471787	2472746	960	CDS	4.62914	0.218862	0.470459	0.582223	0.845554	0.00530696	0.0162818	1.16382	0.582223	1.79695	0.0162818	19.0004
conserved hypothetical protein	COG3181	Energy production and conversion	NP_388641.2	-	yflP	+	833228	834187	960	CDS	4.22989	-0.985537	0.00345366	0.0100528	0.845134	0.00938924	0.0260592	-1.98005	0.0100528	1.79643	0.0260592	17.0055
putative membrane protein	COG4897	Function unknown	NP_391398.1	yes	csbA	-	3615116	3615346	231	CDS	7.82938	0.972902	0.0164234	0.0381045	0.84397	0.0371249	0.0801249	1.96278	0.0381045	1.79498	0.0801249	134.273
isocitrate dehydrogenase	COG0538	Energy production and conversion	NP_390791.1	-	icd	-	2979716	2980987	1272	CDS	9.75647	-0.0412963	0.894504	0.928732	0.84348	0.00714032	0.0207585	-1.02904	0.928732	1.79437	0.0207585	744.043
transcriptional activator of the lichenan operon	COG1762	Carbohydrate transport and metabolism|Signal transduction mechanisms	NP_391739.1	-	licR	-	3962003	3963928	1926	CDS	6.03349	-0.595564	0.0421694	0.0838284	0.842137	0.0039	0.0125762	-1.51106	0.0838284	1.7927	0.0125762	62.2292
3-alkylated purines and hypoxanthine DNA glycosidase	COG2094	Replication, recombination and repair	NP_391741.1	-	aag	-	3964278	3964868	591	CDS	4.16583	0.0107425	0.976466	0.985774	0.841283	0.0210486	0.0507069	1.00747	0.985774	1.79164	0.0507069	14.0973
putative squalene/phytoene synthase	COG1562	Lipid transport and metabolism	NP_388961.1	-	yisP	+	1159922	1160746	825	CDS	5.50793	0.0327862	0.912471	0.939949	0.841223	0.00490104	0.0152878	1.02299	0.939949	1.79157	0.0152878	36.8261
conserved hypothetical protein	undefined	undefined	NP_390109.1	-	yppE	-	2338809	2339180	372	CDS	5.3116	1.80268	4.51795e-09	5.32936e-08	0.839772	0.00642251	0.0189808	3.48868	5.32936e-08	1.78977	0.0189808	16.7687
conserved hypothetical protein	undefined	undefined	NP_388959.1	-	yisN	-	1156504	1157091	588	CDS	1.86952	1.44726	0.00268527	0.00813509	0.838617	0.101347	0.17971	2.72689	0.00813509	1.78834	0.17971	1.71598
hypothetical protein	undefined	undefined	NP_391783.2	-	yxiS	-	4007803	4008093	291	CDS	6.27046	-0.356805	0.430667	0.545981	0.837607	0.0652585	0.126424	-1.28059	0.545981	1.78708	0.126424	64.1986
hypothetical protein	undefined	undefined	NP_388909.1	1	yhfM	-	1102560	1102955	396	CDS	1.95046	1.20986	0.0208876	0.0469936	0.837292	0.119207	0.205251	2.31315	0.0469936	1.78669	0.205251	2.16045
conserved hypothetical protein	COG2304	General function prediction only	NP_387946.1	-	yabS	+	73106	73843	738	CDS	4.25595	-0.402293	0.272381	0.380925	0.837292	0.0210411	0.0507069	-1.32161	0.380925	1.78669	0.0507069	16.962
inositol monophosphatase	COG0483	Carbohydrate transport and metabolism	NP_389350.1	-	suhB	+	1537441	1538238	798	CDS	6.87309	0.628296	0.0334397	0.0693983	0.833485	0.00492768	0.0153359	1.54574	0.0693983	1.78199	0.0153359	86.4039
conserved hypothetical protein	undefined	undefined			yuiB	-	3299344	3299664	321	CDS	5.50743	-0.846624	0.00593849	0.0158536	0.832259	0.0060853	0.0181674	-1.79829	0.0158536	1.78047	0.0181674	44.4478
gamma-D-glutamyl-L-diaminoacid endopeptidase	COG0791	Cell wall/membrane/envelope biogenesis	NP_389182.2	1	ykfC	+	1367941	1368831	891	CDS	2.82754	-0.656001	0.100483	0.17207	0.82754	0.0307028	0.0687368	-1.57571	0.17207	1.77466	0.0687368	6.52324
bacillibactin trilactone hydrolase	COG2819	General function prediction only			besA	-	3292490	3293359	870	CDS	8.11031	0.23857	0.458318	0.570675	0.826872	0.0106002	0.0288172	1.17982	0.570675	1.77384	0.0288172	184.347
putative monooxygenase	COG2141	Coenzyme transport and metabolism|General function prediction only	NP_391689.1	-	ywcH	-	3910302	3911303	1002	CDS	6.56152	0.938931	0.00216151	0.00678884	0.826547	0.0070345	0.0204654	1.91711	0.00678884	1.77344	0.0204654	52.7515
putative 3-oxoacyl-acyl-carrier protein reductase	COG1028	Lipid transport and metabolism|Secondary metabolites biosynthesis, transport and catabolism|General function prediction only			yusS	-	3377430	3377759	330	CDS	1.55881	0.3515	0.442497	0.556511	0.825928	0.0675533	0.129718	1.27589	0.556511	1.77268	0.129718	1.71568
putative beta-hydroxyacid dehydrogenase	COG2084	Lipid transport and metabolism	NP_388680.2	-	yfjR	-	870388	871248	861	CDS	5.16811	0.29505	0.409215	0.52489	0.824976	0.0215789	0.0516509	1.22693	0.52489	1.77151	0.0516509	26.4129
conserved hypothetical protein	COG2151	Posttranslational modification, protein turnover, chaperones	NP_388997.1	-	yitW	+	1192254	1192562	309	CDS	7.48562	0.00331956	0.991619	0.994769	0.820033	0.00987833	0.0270888	1.0023	0.994769	1.76545	0.0270888	148.94
putative membrane protein	COG2076	Defense mechanisms	NP_391330.1	yes	yvdR	+	3541823	3542143	321	CDS	3.05685	1.53135	0.000341389	0.00135401	0.818511	0.063503	0.1237	2.89056	0.00135401	1.76359	0.1237	3.82982
transcriptional regulator of the ntd operon, (LacI family)	COG1609	Transcription	NP_388937.1	-	yhjM	+	1129715	1130704	990	CDS	3.74897	0.525297	0.210651	0.309825	0.816973	0.0525625	0.106448	1.43923	0.309825	1.76171	0.106448	10.6505
conserved hypothetical protein	undefined	undefined	YP_003097716.1	-	xkzA	+	1342955	1343227	273	CDS	1.97282	1.72188	0.00441238	0.0123384	0.81675	0.186958	0.290486	3.29866	0.0123384	1.76143	0.290486	1.80434
putative thiol-disulfide oxidoreductase with thioredoxin domain	COG0526	Posttranslational modification, protein turnover, chaperones			yusE	-	3365069	3365389	321	CDS	3.37034	-0.133109	0.716944	0.796928	0.816443	0.0241552	0.0564999	-1.09665	0.796928	1.76106	0.0564999	9.07331
succinate dehydrogenase (cytochrome b558 subunit)	COG2009	Energy production and conversion	NP_390723.1	yes	sdhC	-	2908129	2908737	609	CDS	8.49375	-1.60556	2.10688e-06	1.44145e-05	0.815134	0.0140273	0.036079	-3.04314	1.44145e-05	1.75946	0.036079	397.617
putative Na+/metabolite cotransporter	COG0591	Amino acid transport and metabolism	NP_388926.1	yes	yhjB	-	1119162	1120631	1470	CDS	2.66374	-0.531102	0.209672	0.308718	0.814952	0.0467061	0.0961046	-1.44503	0.308718	1.75924	0.0961046	6.23286
phage shock protein A homolog	COG1842	Transcription|Signal transduction mechanisms	NP_388499.1	-	pspA	+	671245	671928	684	CDS	6.47612	-4.16244	4.72604e-15	1.55203e-13	0.814936	0.0779229	0.145597	-17.9069	1.55203e-13	1.75922	0.145597	113.137
putative Na+driven efflux transporter	COG0534	Defense mechanisms	NP_388962.1	yes	yisQ	-	1160776	1162143	1368	CDS	2.74198	0.026815	0.940904	0.96056	0.814351	0.0220254	0.0524749	1.01876	0.96056	1.75851	0.0524749	5.61328
phosphorylated protein phosphatase E and diadenosine-polyphosphate hydrolase	COG0639	Signal transduction mechanisms	NP_389045.1	-	prpE	-	1239387	1240121	735	CDS	3.29237	0.725337	0.0339361	0.0701303	0.813002	0.018837	0.046303	1.65329	0.0701303	1.75686	0.046303	6.24859
conserved hypothetical protein	undefined	undefined	NP_388523.1	-	yebG	+	698092	698289	198	CDS	4.64254	1.3652	0.000951646	0.00334175	0.812514	0.0502224	0.102365	2.57613	0.00334175	1.75627	0.102365	10.9446
putative oxidoreductase	COG1028	Lipid transport and metabolism|Secondary metabolites biosynthesis, transport and catabolism|General function prediction only	NP_391199.1	-	yvrD	+	3404835	3405626	792	CDS	6.74948	-0.472882	0.126103	0.20873	0.812186	0.00866039	0.0244168	-1.38788	0.20873	1.75587	0.0244168	102.109
switch protein/serine kinase and anti-sigma factor (inhibitory sigma-B binding protein)	COG2172	Signal transduction mechanisms	NP_388353.1	-	rsbW	+	522414	522896	483	CDS	10.2785	0.451475	0.323215	0.434873	0.81194	0.0769538	0.144287	1.36744	0.434873	1.75557	0.144287	893.306
putative transcriptional regulator	COG0640	Transcription	NP_388420.1	-	ydfF	+	585868	586548	681	CDS	6.00517	1.50507	1.59145e-07	1.43265e-06	0.810888	0.00468525	0.0147153	2.83839	1.43265e-06	1.75429	0.0147153	30.5025
phospholipase component of bacilysocin synthesis or export	COG2267	Lipid transport and metabolism			ytpA	-	3122662	3123441	780	CDS	8.52301	0.905961	0.00139058	0.00466749	0.809089	0.00427871	0.013605	1.87379	0.00466749	1.7521	0.013605	231.729
conserved hypothetical protein	undefined	undefined	NP_389809.1	-	yozN	+	2098859	2099122	264	CDS	0.137548	1.64426	0.0634374	0.11778	0.807618	0.402563	0.525946	3.12586	0.11778	1.75032	0.525946	0.325229
putative aldehyde dehydrogenase	COG1012	Energy production and conversion	NP_389813.1	-	dhaS	+	2100580	2102067	1488	CDS	8.92739	2.82615	1.16999e-18	6.07949e-17	0.807064	0.00776354	0.0222241	7.09178	6.07949e-17	1.74965	0.0222241	107.502
two-component response regulator [YxjM]	COG2197	Signal transduction mechanisms|Transcription	NP_391770.1	-	yxjL	+	3994369	3995025	657	CDS	4.02489	-0.984432	0.00709312	0.0184403	0.806194	0.0230433	0.0543636	-1.97853	0.0184403	1.74859	0.0543636	16.7126
transcriptional regulator	COG3711	Transcription	NP_388297.1	-	mtlR	+	467130	469214	2085	CDS	7.67238	-1.41405	0.00117298	0.00401928	0.805374	0.0606314	0.119315	-2.66484	0.00401928	1.7476	0.119315	197.503
hypothetical protein	undefined	undefined			ytzI	+	3136768	3136944	177	CDS	1.97943	-0.616501	0.28269	0.392174	0.804096	0.143365	0.237208	-1.53315	0.392174	1.74605	0.237208	3.00601
regulator of iron homeostasis	undefined	undefined	NP_388334.1	-	fbpB	-	506322	506501	180	CDS	7.2797	1.01385	0.000514402	0.00195339	0.803461	0.00589423	0.0176612	2.01929	0.00195339	1.74528	0.0176612	65.0835
putative stress adaptation protein	COG2310	Signal transduction mechanisms	NP_388171.1	-	yceC	+	312159	312758	600	CDS	9.44872	0.569713	0.0902413	0.157757	0.802607	0.0173666	0.0430495	1.48423	0.157757	1.74425	0.0430495	491.178
conserved hypothetical protein	undefined	undefined	NP_389638.3	-	ynaI	+	1886057	1886527	471	CDS	1.77091	-0.808611	0.137361	0.22349	0.802255	0.116672	0.201603	-1.75152	0.22349	1.74383	0.201603	3.21743
tRNA-Lys	undefined	undefined			trnJ-Lys	+	95567	95642	76	tRNA	1.97705	-1.22873	0.0118536	0.0286397	0.802207	0.0724961	0.137904	-2.34361	0.0286397	1.74377	0.137904	4.37868
putative exporter	COG2814	Carbohydrate transport and metabolism	NP_389030.2	yes	yjbB	+	1225557	1226774	1218	CDS	2.20555	0.475669	0.235108	0.338401	0.80132	0.0460784	0.0951468	1.39056	0.338401	1.74269	0.0951468	2.84442
transcriptional regulator of the purine degradation operon	COG2508	Transcription			pucR	+	3328762	3330357	1596	CDS	3.76308	-0.934724	0.00666525	0.0174384	0.799489	0.0157358	0.0398736	-1.91153	0.0174384	1.74048	0.0398736	13.1635
protein disulfide isomerase, bacilliredoxin	undefined	undefined	NP_390069.1	-	bshR	-	2300221	2300655	435	CDS	7.74481	-0.389039	0.206116	0.304575	0.799337	0.00960968	0.0265106	-1.30952	0.304575	1.7403	0.0265106	197.319
putative lipoprotein	undefined	undefined	NP_391936.1	-	yybP	-	4169166	4169612	447	CDS	2.53313	-1.79341	2.52074e-06	1.69633e-05	0.799328	0.0131108	0.0339772	-3.46633	1.69633e-05	1.74029	0.0339772	6.4537
conserved hypothetical protein	undefined	undefined			ytmB	-	3131152	3131394	243	CDS	4.74735	0.213719	0.453292	0.565754	0.799095	0.00509116	0.0157492	1.15967	0.565754	1.74001	0.0157492	21.8013
putative iron-sulphur-binding reductase	COG0247	Energy production and conversion	NP_391599.1	yes	fadF	-	3814382	3816499	2118	CDS	4.28431	-0.607276	0.0513761	0.0990601	0.797988	0.00861506	0.0243224	-1.52338	0.0990601	1.73867	0.0243224	16.1248
glycine betaine ABC transporter (ATP-binding protein)	COG0517	Signal transduction mechanisms	NP_388180.2	-	opuAA	+	321013	322269	1257	CDS	8.19742	-0.35634	0.301235	0.41274	0.797813	0.0211306	0.0508446	-1.28017	0.41274	1.73846	0.0508446	221.008
rhamnogalacturonan acetylesterase	COG2755	Amino acid transport and metabolism	NP_388583.1	-	rhgT	+	768137	768835	699	CDS	0.790463	-0.649269	0.358705	0.473776	0.797492	0.227059	0.338814	-1.56837	0.473776	1.73808	0.338814	1.14962
conserved hypothetical protein	undefined	undefined	NP_389810.1	-	yocN	+	2099127	2099360	234	CDS	0.722221	0.467424	0.433046	0.547307	0.796778	0.1816	0.283988	1.38264	0.547307	1.73722	0.283988	0.928196
putative integral inner membrane protein, possibly aquaporin-related	COG5505	Function unknown	NP_389072.1	yes	yjcL	-	1261426	1262616	1191	CDS	3.08631	-0.0817718	0.823739	0.877386	0.796249	0.0280119	0.0638472	-1.05832	0.877386	1.73658	0.0638472	7.64875
carboxylesterase NP	COG0596	Coenzyme transport and metabolism|General function prediction only	NP_388108.1	-	ybfK	+	246658	247548	891	CDS	6.70586	-2.08399	1.68396e-08	1.8096e-07	0.794705	0.0248267	0.0578397	-4.23978	1.8096e-07	1.73472	0.0578397	117.099
putative phosphinothricin acetyltransferase	COG1247	Amino acid transport and metabolism	NP_391537.1	-	ywnH	+	3760694	3761185	492	CDS	7.44465	1.83593	3.42626e-11	5.86034e-10	0.794672	0.00352259	0.0115867	3.57002	5.86034e-10	1.73468	0.0115867	73.2427
putative permease	COG2271	Carbohydrate transport and metabolism	NP_391937.1	yes	yybO	+	4170045	4171352	1308	CDS	5.78373	-0.0152655	0.974617	0.984449	0.794114	0.0994743	0.177309	-1.01064	0.984449	1.73401	0.177309	44.157
putative ribonuclease	COG1658	Translation, ribosomal structure and biogenesis			yusF	-	3365391	3365831	441	CDS	4.30541	-0.116785	0.74379	0.815071	0.793967	0.0257892	0.0597093	-1.08432	0.815071	1.73384	0.0597093	17.8188
putative pepdidoglycan binding protein	COG3409	Cell wall/membrane/envelope biogenesis	NP_388102.1	yes	ybfG	-	239644	241842	2199	CDS	7.55277	2.92856	4.38759e-21	3.33538e-19	0.793829	0.00730492	0.0211621	7.61352	3.33538e-19	1.73367	0.0211621	42.813
hypothetical protein	undefined	undefined	NP_388460.1	1	ydhK	+	624492	625109	618	CDS	6.32001	-0.538757	0.163405	0.254467	0.792906	0.0402703	0.0853872	-1.45272	0.254467	1.73256	0.0853872	72.0189
tRNA-Gly	undefined	undefined			trnJ-Gly	+	95772	95846	75	tRNA	5.12327	-2.20186	2.0457e-07	1.78672e-06	0.792525	0.0476067	0.0976151	-4.60073	1.78672e-06	1.7321	0.0976151	43.5486
6Sb RNA	undefined	undefined			ssrSB	-	2814491	2814691	201	No_CDS	9.45085	1.52522	4.73868e-07	3.81417e-06	0.791735	0.00796105	0.0226945	2.8783	3.81417e-06	1.73115	0.0226945	353.449
putative diguanylate cyclase-related enzyme	COG2199	Signal transduction mechanisms	NP_390843.1	-	ytrP	-	3033696	3035435	1740	CDS	7.23883	0.899273	0.0016842	0.00549574	0.791265	0.00573024	0.0173599	1.86513	0.00549574	1.73059	0.0173599	92.3018
conserved hypothetical protein, phage SPbeta	undefined	undefined	NP_389971.1	yes	yopH	-	2211309	2211845	537	CDS	2.39723	-0.277287	0.521518	0.628547	0.790982	0.0599296	0.118445	-1.21191	0.628547	1.73025	0.118445	4.74831
flavin riboswitch	undefined	undefined			fswA	-	2431473	2431617	145	No_CDS	8.69007	4.46984	3.56676e-37	4.88052e-34	0.790877	0.0112841	0.0301963	22.1592	4.88052e-34	1.73013	0.0301963	44.0792
putative transcriptional regulator (LysR family)	COG0583	Transcription	NP_391710.1	-	ywbI	-	3932198	3933103	906	CDS	5.87401	-0.173961	0.544159	0.648787	0.790728	0.00585595	0.0175977	-1.12815	0.648787	1.72995	0.0175977	49.3427
hypothetical protein, phage SPbeta	undefined	undefined	NP_389967.1	-	yopL	-	2208855	2208980	126	CDS	4.60569	-1.67677	2.41033e-06	1.6247e-05	0.790345	0.0187065	0.0460097	-3.19712	1.6247e-05	1.72949	0.0460097	24.2342
putative NAD(P)-dependent dehydrogenase	COG1028	Lipid transport and metabolism|Secondary metabolites biosynthesis, transport and catabolism|General function prediction only	NP_388826.1	-	yhdF	+	1022231	1023100	870	CDS	6.28737	-0.612153	0.123154	0.20451	0.790165	0.0463984	0.0956751	-1.52854	0.20451	1.72927	0.0956751	76.4673
cysteine and O-acetylserine efflux permease	COG0697	Carbohydrate transport and metabolism|Amino acid transport and metabolism|General function prediction only	NP_391280.1	yes	cyeB	+	3488952	3489869	918	CDS	4.03425	0.289783	0.400548	0.51641	0.788072	0.0225952	0.0534909	1.22246	0.51641	1.72677	0.0534909	12.0679
putative efflux transporter	COG2814	Carbohydrate transport and metabolism	NP_388070.1	yes	ybcL	+	211859	213031	1173	CDS	6.04574	0.028418	0.920419	0.945999	0.787636	0.00576829	0.0173981	1.01989	0.945999	1.72624	0.0173981	51.0969
component of the piezosome (stressosome)	COG1366	Signal transduction mechanisms	NP_390356.2	-	rsbRD	-	2562966	2563802	837	CDS	6.93818	-0.569817	0.115419	0.193327	0.786644	0.0297963	0.0671316	-1.48434	0.193327	1.72506	0.0671316	124.453
intracellular proteinase inhibitor BsuPI	undefined	undefined	NP_388994.1	-	ipi	+	1189646	1190005	360	CDS	6.02636	-0.0731088	0.820451	0.874339	0.78587	0.0149986	0.0382893	-1.05198	0.874339	1.72413	0.0382893	53.963
putative ABC transporter (ATP-binding protein)	COG0488	General function prediction only	NP_388476.2	-	ydiF	-	644528	646456	1929	CDS	7.04814	0.849362	0.00657518	0.0172467	0.785691	0.0120086	0.0318239	1.8017	0.0172467	1.72392	0.0318239	77.8847
conserved hypothetical protein	undefined	undefined	NP_388634.1	-	yfmB	-	826843	827211	369	CDS	1.74963	-0.468689	0.319404	0.430876	0.785565	0.0768291	0.144208	-1.38385	0.430876	1.72377	0.144208	2.99057
putative efflux transporter	COG2223	Inorganic ion transport and metabolism	NP_388613.1	yes	yfnC	-	803317	804546	1230	CDS	5.24428	-1.64571	1.53806e-07	1.39376e-06	0.785496	0.00874056	0.0245922	-3.12902	1.39376e-06	1.72369	0.0245922	40.8163
inner spore coat protein	undefined	undefined	NP_391671.1	-	gerQ	+	3893441	3893986	546	CDS	1.32872	1.58438	0.0038189	0.0109703	0.783624	0.196538	0.302281	2.99879	0.0109703	1.72145	0.302281	0.803511
phosphotransferase system (PTS) mannitol-specific enzyme IICB component	COG2213	Carbohydrate transport and metabolism	NP_388280.2	yes	mtlA	+	449724	451160	1437	CDS	9.24203	-2.48327	4.75796e-05	0.00023965	0.782544	0.178184	0.280345	-5.59164	0.00023965	1.72016	0.280345	676.296
putative aldehyde dehydrogenase	COG1012	Energy production and conversion	NP_391762.1	-	aldY	+	3986428	3987885	1458	CDS	5.61062	-0.0360721	0.945947	0.965228	0.781112	0.143987	0.237853	-1.02532	0.965228	1.71845	0.237853	40.7397
putative ABC transporter (permease)	COG0765	Amino acid transport and metabolism	NP_391828.1	yes	yxeN	-	4058791	4059465	675	CDS	2.21508	-1.03606	0.0271713	0.0585196	0.780771	0.0756974	0.142737	-2.05062	0.0585196	1.71805	0.142737	4.85358
putative lipoprotein	undefined	undefined	NP_388107.1	-	ybfJ	+	246094	246492	399	CDS	4.41625	0.751101	0.0187988	0.0428717	0.780382	0.015589	0.0395996	1.68308	0.0428717	1.71759	0.0395996	13.8668
aldose 1-epimerase	COG2017	Carbohydrate transport and metabolism	NP_389718.1	-	galM	-	1999849	2000826	978	CDS	3.74046	0.343352	0.298985	0.410068	0.778092	0.0192847	0.0471539	1.2687	0.410068	1.71486	0.0471539	7.6511
ATP-dependent DNA helicase	COG0514	Replication, recombination and repair	NP_390183.1	-	recQ	-	2406922	2408412	1491	CDS	6.47352	0.888236	0.00106516	0.00368451	0.777914	0.00425354	0.0135355	1.85091	0.00368451	1.71465	0.0135355	53.1174
tRNA-Ala	undefined	undefined			trnSL-Ala1	-	3194455	3194527	73	tRNA	0.545785	-2.23942	0.00191874	0.00611525	0.7775	0.14638	0.240741	-4.72206	0.00611525	1.71416	0.240741	1.42163
oligopeptide ABC transporter (ATP-binding protein)	COG0444	Amino acid transport and metabolism|Inorganic ion transport and metabolism	NP_389028.1	-	oppD	+	1223455	1224531	1077	CDS	4.85334	-1.48317	0.000298036	0.00119827	0.777098	0.0507918	0.10332	-2.79563	0.00119827	1.71368	0.10332	33.5876
regulator of iron homeostasis	undefined	undefined		-	fbpA	-	506455	506619	165	CDS	4.15909	1.35168	0.000216667	0.000908498	0.776457	0.0369988	0.0798948	2.55209	0.000908498	1.71292	0.0798948	7.27662
ABC transporter (membrane protein)	COG4473	Intracellular trafficking, secretion, and vesicular transport	NP_388886.1	yes	ecsB	+	1078176	1079402	1227	CDS	6.73733	0.0541636	0.845002	0.893773	0.776388	0.00524686	0.0161457	1.03826	0.893773	1.71284	0.0161457	83.6091
lipocalin-like protein	undefined	undefined	NP_391836.1	-	yxeF	-	4065074	4065508	435	CDS	5.35532	-1.02132	0.00297394	0.0088915	0.775912	0.021838	0.0521193	-2.02978	0.0088915	1.71227	0.0521193	43.1105
conserved hypothetical protein	undefined	undefined	NP_389380.1	-	ylbD	+	1567651	1568049	399	CDS	1.36716	0.749289	0.187918	0.283187	0.77577	0.184833	0.287837	1.68096	0.283187	1.7121	0.287837	1.32209
hypothetical protein	undefined	undefined	YP_003097689.1	1	ydzJ	-	680907	681065	159	CDS	1.00419	-0.899413	0.101699	0.17373	0.775695	0.0998738	0.177866	-1.86531	0.17373	1.71201	0.177866	1.54778
conserved hypothetical protein	undefined	undefined	NP_391485.1	-	ywrJ	-	3714002	3714679	678	CDS	0.409724	1.8999	0.0151097	0.0354835	0.774996	0.372388	0.494709	3.73187	0.0354835	1.71118	0.494709	0.372718
putative monooxygenase	COG2141	Coenzyme transport and metabolism|General function prediction only	NP_388170.2	-	yceB	-	310880	311875	996	CDS	4.01494	-0.00752223	0.983268	0.989778	0.774836	0.0299006	0.0672928	-1.00523	0.989778	1.711	0.0672928	12.8571
assembly factor BSco of the Cu(A) site of cytochrome c oxidase	COG1999	Posttranslational modification, protein turnover, chaperones	NP_390058.2	1	scuA	-	2291703	2292284	582	CDS	3.64173	-0.601632	0.0517046	0.0996	0.774611	0.00940677	0.0260735	-1.51743	0.0996	1.71073	0.0260735	11.7057
conserved hypothetical protein	COG4336	Function unknown	NP_388289.3	-	ycsI	+	459049	459822	774	CDS	4.92349	-2.62906	7.70133e-08	7.43858e-07	0.77392	0.0875716	0.159486	-6.18625	7.43858e-07	1.70991	0.159486	36.5209
hypothetical protein, phage SPbeta	undefined	undefined	NP_389925.1	-	yorC	-	2187376	2187756	381	CDS	1.71321	-0.687195	0.216791	0.316926	0.773807	0.140761	0.234031	-1.61015	0.316926	1.70978	0.234031	2.67078
glucose-1-phosphate adenylyltransferase (ADP-glucose pyrophosphorylase) beta subunit	COG0448	Carbohydrate transport and metabolism			glgD	-	3167569	3168600	1032	CDS	2.0919	-1.18042	0.00476047	0.0131772	0.773341	0.0380867	0.0817708	-2.26642	0.0131772	1.70922	0.0817708	4.33868
putative oxidoreductase	COG0673	General function prediction only	NP_390655.1	-	yrbE	-	2838847	2839872	1026	CDS	6.54643	-1.61707	7.52071e-05	0.000356495	0.77275	0.0523752	0.106121	-3.06752	0.000356495	1.70852	0.106121	92.2453
pleiotropic regulator	undefined	undefined			degQ	-	3257092	3257232	141	CDS	2.51545	2.08082	5.78172e-06	3.57439e-05	0.772454	0.113262	0.196591	4.23046	3.57439e-05	1.70817	0.196591	2.31982
putative oxidoreductase with thioredoxin domain	COG1393	Inorganic ion transport and metabolism			yusI	-	3366573	3366929	357	CDS	6.58257	-0.62474	0.0387581	0.0780677	0.772425	0.0103445	0.028234	-1.54193	0.0780677	1.70814	0.028234	85.0615
putative phage protein	undefined	undefined	NP_388087.1	-	ybdO	+	225064	226248	1185	CDS	3.12366	0.836909	0.0326094	0.0679155	0.771987	0.0518932	0.1053	1.78622	0.0679155	1.70762	0.1053	5.24747
hypothetical protein	undefined	undefined			yuzG	-	3302623	3302763	141	CDS	5.04343	-0.0131118	0.972581	0.983361	0.771092	0.0436723	0.091327	-1.00913	0.983361	1.70656	0.091327	29.9795
alkaline phosphatase III	COG1785	Inorganic ion transport and metabolism|General function prediction only	NP_388455.2	-	phoB	-	620097	621485	1389	CDS	3.05323	1.41841	0.000117338	0.000529312	0.770435	0.045602	0.0944456	2.67291	0.000529312	1.70578	0.0944456	3.90333
protein-tyrosine-phosphatase	COG0394	Signal transduction mechanisms	NP_388669.1	-	yfkJ	+	862004	862474	471	CDS	8.06287	0.43292	0.362441	0.477324	0.768788	0.107248	0.188223	1.34996	0.477324	1.70384	0.188223	170.098
putative H+/Ca2+ antiporter	COG0387	Inorganic ion transport and metabolism	NP_388673.1	yes	yfkE	+	865205	866260	1056	CDS	7.71555	0.0960208	0.881224	0.919762	0.768051	0.234632	0.347211	1.06882	0.919762	1.70297	0.347211	144.549
conserved hypothetical protein	COG0346	Secondary metabolites biosynthesis, transport and catabolism	NP_391923.1	-	yycE	-	4156931	4157350	420	CDS	1.57143	-0.0225048	0.968458	0.980158	0.76767	0.173132	0.274193	-1.01572	0.980158	1.70252	0.274193	2.00945
putative exonuclease	COG0420	Replication, recombination and repair	NP_388872.1	-	yhaO	+	1064846	1066072	1227	CDS	6.22503	-0.457755	0.0928281	0.160867	0.767255	0.00473451	0.014836	-1.3734	0.160867	1.70203	0.014836	68.9527
spore associated protein	undefined	undefined	NP_388567.2	-	yeeK	+	753265	753702	438	CDS	3.58623	-0.13421	0.786879	0.849813	0.767151	0.120656	0.206803	-1.09749	0.849813	1.70191	0.206803	8.36022
Holliday junction resolvase	COG3331	General function prediction only	NP_390112.1	-	recU	+	2340802	2341422	621	CDS	7.23685	3.09014	6.44479e-15	2.03507e-13	0.765537	0.0397479	0.0845415	8.51579	2.03507e-13	1.7	0.0845415	42.466
4-hydroxy-3-methylbut-2-en-1-yl diphosphate synthase (1-hydroxy-2-methyl-2-(E)-butenyl 4-diphosphate	COG0821	Lipid transport and metabolism	NP_390386.1	yes	ispG	+	2589123	2590256	1134	CDS	8.80239	2.03152	4.31773e-11	7.2344e-10	0.764868	0.0106002	0.0288172	4.08835	7.2344e-10	1.69921	0.0288172	173.648
antitoxin small RNA	undefined	undefined			rtaD	-	2273705	2273884	180	No_CDS	4.77483	0.726626	0.0749885	0.135488	0.762865	0.0625671	0.122187	1.65476	0.135488	1.69686	0.122187	19.2545
lipoprotein involved in guanosine transport	COG1744	Cell wall/membrane/envelope biogenesis			nupN	+	3239930	3241009	1080	CDS	1.46429	-0.44785	0.345908	0.460127	0.762523	0.0865404	0.157888	-1.36401	0.460127	1.69645	0.157888	2.20999
tRNA-Glu	undefined	undefined			trnB-Glu	-	3171879	3171950	72	tRNA	3.74666	-1.29905	0.000100994	0.000461158	0.761889	0.0153942	0.0391774	-2.46066	0.000461158	1.69571	0.0391774	15.0032
conserved hypothetical protein	COG4876	Function unknown	NP_388319.1	-	ydaT	-	492989	493441	453	CDS	5.29506	0.801704	0.135439	0.221505	0.761646	0.156844	0.254282	1.74316	0.221505	1.69542	0.254282	21.9309
fructoselysine kinase	COG0524	Carbohydrate transport and metabolism			frlD	-	3347051	3347905	855	CDS	4.29312	0.036475	0.900544	0.933159	0.759987	0.00900715	0.0252385	1.0256	0.933159	1.69348	0.0252385	16.4806
galactokinase	COG0153	Carbohydrate transport and metabolism	NP_391699.1	-	galK	-	3920638	3921810	1173	CDS	7.47106	-0.179295	0.59776	0.695917	0.759719	0.0260051	0.0601414	-1.13233	0.695917	1.69316	0.0601414	144.85
dethiobiotin synthetase	COG0132	Coenzyme transport and metabolism			bioD	-	3091492	3092187	696	CDS	2.27192	1.26188	0.0020813	0.00655696	0.759574	0.0800776	0.148125	2.39808	0.00655696	1.69299	0.148125	2.2397
transporter involved in K+ efflux	COG0475	Inorganic ion transport and metabolism	NP_388866.2	yes	yhaU	-	1059203	1060420	1218	CDS	6.54728	1.47225	7.64979e-07	5.87148e-06	0.759303	0.0102597	0.0280775	2.77454	5.87148e-06	1.69267	0.0280775	44.776
putative desulfurase involved in iron-sulfur clusters for NAD biosynthesis	COG1104	Amino acid transport and metabolism	NP_390666.1	-	nifS	+	2849569	2850756	1188	CDS	2.96891	-0.131032	0.730266	0.807364	0.758238	0.0421511	0.088779	-1.09508	0.807364	1.69142	0.088779	6.13449
putative phosphatase	COG0561	Coenzyme transport and metabolism|General function prediction only	NP_388286.2	-	ycsE	+	456068	456817	750	CDS	7.00848	-0.0176676	0.951634	0.968383	0.757921	0.00955789	0.02645	-1.01232	0.968383	1.69105	0.02645	96.997
transcriptional repressor of the ara regulon (LacI family)	COG1609	Transcription	NP_391277.1	-	araR	+	3485670	3486758	1089	CDS	6.72547	-0.79859	0.0875101	0.153977	0.7579	6.79211e-05	0.000389953	-1.7394	0.153977	1.69103	0.000389953	68.4997
conserved hypothetical protein	undefined	undefined	YP_003097756.1	-	ypzI	+	2393422	2393559	138	CDS	3.19465	2.84974	1.36699e-11	2.50512e-10	0.756662	0.108349	0.189795	7.2087	2.50512e-10	1.68958	0.189795	1.99518
carboxylesterase	COG1647	Secondary metabolites biosynthesis, transport and catabolism	NP_391242.1	-	yvaK	-	3454221	3454961	741	CDS	7.44346	-0.176363	0.580911	0.681131	0.756456	0.0183633	0.0452741	-1.13003	0.681131	1.68934	0.0452741	150.836
putative hydrolase	COG0400	General function prediction only	NP_389837.1	-	yodD	-	2128464	2129066	603	CDS	2.96538	1.45625	0.000338629	0.00134566	0.753986	0.0785796	0.146423	2.74393	0.00134566	1.68645	0.146423	3.08497
putative ribonuclease BN	COG1295	Function unknown	NP_388671.1	yes	rbn	+	862836	863663	828	CDS	8.21991	0.197454	0.696459	0.780285	0.753716	0.138486	0.23081	1.14667	0.780285	1.68613	0.23081	193.672
putative amidohydrolase	COG0388	General function prediction only	NP_388806.2	-	yhcX	+	998402	999943	1542	CDS	7.79441	0.0707207	0.809178	0.864551	0.753313	0.0104779	0.0285426	1.05024	0.864551	1.68566	0.0285426	171.399
transcriptional activator of the maltodextrin operon (LacI family)	COG1609	Transcription	NP_391343.1	-	mdxR	-	3557784	3558734	951	CDS	0.200526	-0.74693	0.372618	0.488065	0.752559	0.311463	0.430926	-1.67822	0.488065	1.68478	0.430926	0.671336
putative thiol-disulfide oxidoreductase with thioredoxin domain	COG0526	Posttranslational modification, protein turnover, chaperones			ytpP	-	3054188	3054511	324	CDS	6.47557	-0.503722	0.0645879	0.119587	0.752472	0.0056334	0.0171424	-1.41787	0.119587	1.68468	0.0171424	80.8526
conserved hypothetical protein	undefined	undefined	NP_390111.1	-	yppC	-	2339799	2340761	963	CDS	0.643621	0.369703	0.552526	0.657616	0.751859	0.224557	0.335446	1.29209	0.657616	1.68396	0.335446	0.845269
multifunctional SOS repair factor	COG0468	Replication, recombination and repair	NP_389576.2	-	recA	+	1764645	1765691	1047	CDS	10.0344	1.13068	0.000253273	0.00103451	0.751584	0.014374	0.0368093	2.18962	0.00103451	1.68364	0.0368093	634.356
tRNA specific adenosine deaminase	COG0590	Translation, ribosomal structure and biogenesis	NP_387899.1	-	tadA	+	25852	26337	486	CDS	4.39965	0.374184	0.311954	0.422631	0.751077	0.0428282	0.0899744	1.29611	0.422631	1.68305	0.0899744	17.2611
two-component sensor histidine kinase [YhcZ]	COG2203	Signal transduction mechanisms	NP_388813.1	-	yhcY	+	1008668	1009807	1140	CDS	4.35606	-0.134896	0.752222	0.821021	0.749267	0.0791941	0.146967	-1.09801	0.821021	1.68094	0.146967	17.6417
excinuclease ABC (subunit A)	COG0178	Replication, recombination and repair	NP_391396.1	-	uvrA	-	3610064	3612937	2874	CDS	9.23924	0.474154	0.131941	0.216907	0.749042	0.0177063	0.0438121	1.3891	0.216907	1.68068	0.0438121	435.43
conserved hypothetical protein	undefined	undefined	NP_390246.1	-	yqkC	-	2461621	2461860	240	CDS	6.80166	1.87619	5.19493e-10	7.50886e-09	0.747225	0.0120245	0.0318251	3.67105	7.50886e-09	1.67856	0.0318251	43.5413
putative enzymes similar to sulfite oxidase	COG2041	Energy production and conversion			yuiH	-	3293573	3294169	597	CDS	5.27403	0.22346	0.430664	0.545981	0.747218	0.00862261	0.024327	1.16753	0.545981	1.67855	0.024327	30.0838
ribosomal protein Ctc, binding 5S RNA	COG1825	Translation, ribosomal structure and biogenesis	NP_387933.1	-	ctc	+	58783	59397	615	CDS	11.6579	-0.548387	0.16833	0.259968	0.745434	0.0617587	0.121301	-1.46245	0.259968	1.67648	0.121301	3004.48
6-phosphogluconolactonase	COG2706	Carbohydrate transport and metabolism	NP_389184.1	-	pgl	-	1369876	1370925	1050	CDS	8.49814	-0.326268	0.269403	0.377569	0.743473	0.0121464	0.0320443	-1.25377	0.377569	1.6742	0.0320443	310.191
lysine-8-amino-7-oxononanoate aminotransferase	COG0161	Coenzyme transport and metabolism			bioK	-	3093343	3094689	1347	CDS	3.24136	1.58685	1.19035e-05	6.74916e-05	0.743119	0.0536882	0.108044	3.00393	6.74916e-05	1.67379	0.108044	3.54722
conserved hypothetical protein	COG2304	General function prediction only	NP_388143.2	-	ycbR	+	283003	283734	732	CDS	3.8589	-0.526061	0.0872923	0.153762	0.74236	0.0130212	0.0338733	-1.43999	0.153762	1.67291	0.0338733	12.7973
xanthine dehydrogenase, iron-sulfur subunit	COG2080	Energy production and conversion			pucE	-	3335751	3336272	522	CDS	1.38964	-0.171308	0.711188	0.793107	0.741036	0.0923974	0.166648	-1.12608	0.793107	1.67138	0.166648	2.0512
regulator of RsbP phosphatase	COG0596	Coenzyme transport and metabolism|General function prediction only	NP_391290.1	-	rsbQ	+	3499541	3500350	810	CDS	5.4949	-0.358487	0.247859	0.353087	0.739974	0.0168012	0.0419265	-1.28208	0.353087	1.67015	0.0419265	42.4858
putative lipoprotein	undefined	undefined	NP_388454.1	-	ydhF	-	619321	620031	711	CDS	1.20145	0.369419	0.553523	0.658421	0.739876	0.240794	0.35416	1.29183	0.658421	1.67003	0.35416	1.49543
putative ABC transporter (ATP-binding protein)	COG1131	Defense mechanisms	NP_388330.1	-	ydbJ	+	502908	503834	927	CDS	8.19057	-0.191576	0.645938	0.736548	0.738834	0.0777913	0.145548	-1.14201	0.736548	1.66883	0.145548	229.107
putative hydrolase	COG0412	Secondary metabolites biosynthesis, transport and catabolism	NP_388284.2	-	yczH	-	454652	455260	609	CDS	4.64822	-0.769923	0.00992903	0.0245091	0.73583	0.0116533	0.0309823	-1.70518	0.0245091	1.66536	0.0309823	23.7684
tRNA-Met	undefined	undefined			trnSL-Met1	+	70181	70257	77	tRNA	1.14878	-0.873811	0.170828	0.262563	0.733881	0.216856	0.326317	-1.8325	0.262563	1.66311	0.326317	2.07208
putative phosphotransferase system enzyme IIA component	COG2190	Carbohydrate transport and metabolism	NP_390105.1	-	ypqE	-	2336933	2337439	507	CDS	6.89077	0.698767	0.0154659	0.0362371	0.733523	0.011243	0.0301651	1.62312	0.0362371	1.66269	0.0301651	80.3695
conserved hypothetical protein with ACT domain, N-terminal part of YmfK	undefined	undefined			ymfK	+	1760851	1761303	453	CDS	6.61459	1.22109	0.000280717	0.00113356	0.733204	0.028428	0.0645805	2.33122	0.00113356	1.66233	0.0645805	56.8701
sirtuin NAD-dependent deacetylase	COG0846	Posttranslational modification, protein turnover, chaperones	NP_388846.1	-	srtN	+	1040094	1040837	744	CDS	5.06465	-0.159342	0.691153	0.775187	0.732275	0.068073	0.130579	-1.11678	0.775187	1.66126	0.130579	26.7053
transcriptional repressor of lmrAB and yxaGH operons	COG1309	Transcription	NP_388150.1	-	lmrA	-	290132	290698	567	CDS	7.33023	1.90006	5.66651e-11	9.34178e-10	0.730645	0.0103374	0.0282334	3.73228	9.34178e-10	1.65938	0.0282334	56.8494
L-aspartate oxidase	COG0029	Coenzyme transport and metabolism	NP_390665.1	1	nadB	-	2847871	2849466	1596	CDS	2.84944	-0.628375	0.0833612	0.148009	0.729229	0.0348961	0.0761555	-1.54582	0.148009	1.65775	0.0761555	7.10562
putative spore germination protein	undefined	undefined	NP_389658.1	yes	yndD	+	1907494	1909056	1563	CDS	1.08752	0.58044	0.305553	0.416987	0.726426	0.207638	0.316037	1.49531	0.416987	1.65454	0.316037	1.24313
conserved hypothetical protein	COG1547	Function unknown	NP_390204.1	-	ypuF	+	2426867	2427391	525	CDS	3.84312	1.56787	1.44628e-05	8.09957e-05	0.724738	0.0489113	0.10004	2.96468	8.09957e-05	1.6526	0.10004	7.32587
putative integral inner membrane protein	COG2095	Amino acid transport and metabolism	NP_391265.1	yes	yvbG	-	3471841	3472476	636	CDS	4.68255	-0.0711507	0.866449	0.909274	0.721778	0.0884184	0.160885	-1.05055	0.909274	1.64921	0.160885	21.482
oligopeptide ABC transporter (ATP-binding protein)	COG0444	Amino acid transport and metabolism|Inorganic ion transport and metabolism	NP_389018.1	-	appD	+	1211477	1212463	987	CDS	1.79065	-1.51034	0.00100296	0.00350994	0.720653	0.0673914	0.129562	-2.84878	0.00350994	1.64793	0.129562	3.71028
5-dehydro-4-deoxyglucarate dehydratase	COG0329	Amino acid transport and metabolism|Cell wall/membrane/envelope biogenesis	NP_388128.2	-	ycbC	+	267890	268816	927	CDS	1.83932	0.181717	0.660502	0.749408	0.720381	0.0761887	0.143531	1.13423	0.749408	1.64762	0.143531	2.2566
flagellar component of cell-proximal portion of basal-body rod	COG1558	Cell motility	NP_389501.1	-	flgC	+	1691667	1692119	453	CDS	4.40932	-1.38988	0.000526192	0.0019908	0.719208	0.0638078	0.124135	-2.62057	0.0019908	1.64628	0.124135	25.4509
ribosomal protein L11 methyltransferase	COG2264	Translation, ribosomal structure and biogenesis	NP_390423.2	-	prmA	-	2623825	2624760	936	CDS	7.60493	-0.404334	0.177379	0.270583	0.719073	0.0166459	0.0416145	-1.32348	0.270583	1.64612	0.0416145	196.108
DNA repair and genetic recombination factor	COG1195	Replication, recombination and repair	NP_387885.1	-	recF	+	3437	4549	1113	CDS	9.60097	-0.766633	0.0352108	0.0723124	0.717558	0.0484538	0.0992034	-1.7013	0.0723124	1.6444	0.0992034	798.129
chaperone involved in Fe-S cluster assembly	COG0316	Posttranslational modification, protein turnover, chaperones			sufA	-	3305599	3305961	363	CDS	8.07272	1.26481	2.52072e-05	0.000136152	0.717372	0.016035	0.0405068	2.40296	0.000136152	1.64418	0.0405068	144.007
putative peroxydase	COG2267	Lipid transport and metabolism	NP_388509.1	-	ydjP	-	681547	682362	816	CDS	5.77409	-2.81198	1.29671e-13	3.3478e-12	0.715662	0.0398444	0.0847029	-7.02247	3.3478e-12	1.64224	0.0847029	65.7518
putative lyase	COG0346	Secondary metabolites biosynthesis, transport and catabolism	NP_391716.1	-	ywbC	+	3937135	3937515	381	CDS	5.56616	-0.702676	0.0475756	0.0928235	0.71565	0.0421261	0.088772	-1.62752	0.0928235	1.64222	0.088772	46.7449
two-component sensor histidine kinase [YvfU]	COG4585	Signal transduction mechanisms	NP_391287.1	yes	yvfT	-	3496495	3497610	1116	CDS	5.1963	-0.419575	0.184209	0.278754	0.714777	0.0230572	0.0543652	-1.33753	0.278754	1.64123	0.0543652	37.0529
cell-division protein	COG0772	Cell cycle control, cell division, chromosome partitioning	NP_389368.1	yes	ftsW	+	1552899	1554110	1212	CDS	7.59875	0.364093	0.294354	0.404799	0.713238	0.0407011	0.0862115	1.28707	0.404799	1.63948	0.0862115	143.241
conserved hypothetical protein	undefined	undefined	NP_388457.1	1	ydhH	-	622293	622790	498	CDS	3.80142	0.855116	0.0103452	0.0254327	0.71301	0.0351072	0.0765347	1.8089	0.0254327	1.63922	0.0765347	8.63913
putative enzyme associated to DNA transport (competence)	COG2131	Nucleotide transport and metabolism	NP_390436.1	-	comEB	-	2639877	2640446	570	CDS	6.35651	1.32747	9.04672e-06	5.34343e-05	0.712958	0.016656	0.0416145	2.50962	5.34343e-05	1.63916	0.0416145	44.374
thymidylate kinase	COG0125	Nucleotide transport and metabolism	NP_387909.2	-	tmk	+	39159	39797	639	CDS	6.15002	1.4144	6.83935e-07	5.32742e-06	0.712271	0.0120595	0.0318679	2.6655	5.32742e-06	1.63838	0.0318679	42.2041
putative transcriptional regulator (Xre family), phage SPbeta	COG1395	Transcription	NP_389985.1	-	yonR	-	2221061	2221387	327	CDS	1.77554	-0.638938	0.276613	0.385306	0.712013	0.20679	0.314981	-1.55718	0.385306	1.63809	0.314981	3.18877
DNA 3'-5' helicase IV	COG3973	Replication, recombination and repair	NP_391225.1	-	helD	-	3434327	3436651	2325	CDS	6.87989	-0.507054	0.090272	0.157757	0.71184	0.0173022	0.0429936	-1.42115	0.157757	1.63789	0.0429936	112.092
galactose-1-phosphate uridyltransferase	COG4468	Carbohydrate transport and metabolism	NP_391698.2	-	galT	-	3919093	3920634	1542	CDS	7.78846	-0.413685	0.273219	0.381614	0.710635	0.0604139	0.119127	-1.33208	0.381614	1.63652	0.119127	183.419
conserved hypothetical protein	undefined	undefined	YP_003097730.1	1	ynzI	+	1885753	1885917	165	CDS	1.52945	0.0898456	0.843419	0.892789	0.710622	0.109472	0.191308	1.06426	0.892789	1.63651	0.191308	2.34526
conserved hypothetical protein	undefined	undefined	NP_390602.1	yes	yrhC	-	2784688	2784918	231	CDS	3.97064	1.48718	0.000103503	0.000471563	0.710597	0.0672677	0.129519	2.80341	0.000471563	1.63648	0.129519	8.15511
transcriptional regulator for cypB	COG1309	Transcription	NP_390595.1	1	bscR	-	2777070	2777654	585	CDS	4.45838	3.59656	9.7741e-18	4.45808e-16	0.710474	0.0932017	0.167951	12.0968	4.45808e-16	1.63634	0.167951	4.51438
conserved hypothetical protein	COG5583	Function unknown	NP_388600.1	-	yezD	+	787715	787882	168	CDS	0.507195	-0.446755	0.581328	0.681426	0.710291	0.367105	0.488957	-1.36297	0.681426	1.63613	0.488957	1.00259
conserved hypothetical protein	undefined	undefined	NP_391331.1	-	yvdQ	-	3542179	3542691	513	CDS	1.10719	-0.414298	0.417859	0.534198	0.710103	0.136308	0.227642	-1.33265	0.534198	1.63592	0.227642	1.72171
1-deoxyxylulose-5-phosphate synthase	COG1154	Coenzyme transport and metabolism|Lipid transport and metabolism	NP_390307.1	-	dxs	-	2523713	2525614	1902	CDS	9.05272	0.393558	0.180236	0.274228	0.707425	0.0163849	0.0411627	1.31363	0.274228	1.63289	0.0411627	386.238
putative oxidoreductase	COG0300	General function prediction only	NP_389569.2	-	ymfI	+	1759655	1760383	729	CDS	4.39033	0.248711	0.579959	0.681131	0.706548	0.116689	0.201603	1.18814	0.681131	1.63189	0.201603	14.1336
UDP-N-acetylglucosamine 1-carboxyvinyltransferase	COG0766	Cell wall/membrane/envelope biogenesis	NP_391557.1	-	murAA	-	3777949	3779259	1311	CDS	11.9959	2.82843	5.87415e-20	3.88925e-18	0.706198	0.0150113	0.0382981	7.10301	3.88925e-18	1.6315	0.0382981	1075.84
putative transcriptional regulator	COG1309	Transcription	NP_388439.1	-	ydgC	+	603012	603599	588	CDS	6.74131	0.876426	0.0040185	0.0114476	0.704909	0.0207171	0.0501378	1.83582	0.0114476	1.63004	0.0501378	66.5629
transcriptional regulator (Fur family)	COG0735	Inorganic ion transport and metabolism	NP_390389.2	-	zur	-	2591428	2591865	438	CDS	8.18676	2.42153	4.43663e-16	1.67086e-14	0.704125	0.0139916	0.0360098	5.35739	1.67086e-14	1.62916	0.0360098	91.7913
putative cell division protein	COG1961	Replication, recombination and repair	NP_389670.1	-	yneB	+	1918742	1919395	654	CDS	3.78714	0.895165	0.00452174	0.0126013	0.702721	0.0281915	0.0641853	1.85982	0.0126013	1.62757	0.0641853	9.6182
putative metal-dependent phosphohydrolase	COG1078	General function prediction only	NP_388459.1	-	ydhJ	+	623373	624350	978	CDS	4.49432	-0.179158	0.522965	0.629922	0.702351	0.011522	0.0306931	-1.13222	0.629922	1.62715	0.0306931	19.1886
ribokinase	COG0524	Carbohydrate transport and metabolism	NP_391473.1	-	rbsK	+	3702393	3703274	882	CDS	8.78447	-0.320891	0.494447	0.603181	0.701324	0.136727	0.228249	-1.2491	0.603181	1.626	0.228249	221.809
factor involved in shape determination (sporulation)	COG2718	General function prediction only	NP_388779.1	-	yhbH	+	975231	976409	1179	CDS	3.37422	2.62917	5.44726e-12	1.08024e-10	0.700486	0.0910605	0.164671	6.18671	1.08024e-10	1.62505	0.164671	3.0438
conserved hypothetical protein	COG4873	Function unknown	NP_389264.2	-	ykvS	-	1447662	1447847	186	CDS	4.36222	0.512157	0.192272	0.288583	0.699637	0.0764061	0.143677	1.42618	0.288583	1.6241	0.143677	15.1797
N-acetylmannosamine (ManNAc) C4 hydroxyl of a membrane-anchored N-acetylglucosaminyl diphospholipid	COG1922	Cell wall/membrane/envelope biogenesis	NP_391456.1	-	tagA	+	3681370	3682140	771	CDS	7.4079	1.68271	1.39338e-06	9.94753e-06	0.698633	0.0413623	0.0873418	3.2103	9.94753e-06	1.62297	0.0873418	91.814
guanosine ABC transporter (ATP-binding protein)	COG3845	General function prediction only			nupO	+	3241085	3242617	1533	CDS	1.4583	-1.05943	0.0767027	0.138099	0.698176	0.210318	0.318934	-2.08411	0.138099	1.62245	0.318934	2.58698
ferrichrome ABC transporter (permease)	COG0609	Inorganic ion transport and metabolism	NP_391212.1	yes	fhuB	-	3417222	3418376	1155	CDS	9.28006	0.68179	0.0266837	0.0576508	0.697791	0.023414	0.0550799	1.60413	0.0576508	1.62202	0.0550799	362.347
spore protein	COG1388	Cell wall/membrane/envelope biogenesis	NP_389261.1	-	ykvP	+	1444099	1445298	1200	CDS	2.20856	1.49862	0.00572954	0.0154329	0.697356	0.217215	0.326617	2.82572	0.0154329	1.62153	0.326617	2.15677
conserved hypothetical protein	undefined	undefined	NP_388510.1	-	yeaA	-	682375	683364	990	CDS	6.1077	-2.77174	2.51716e-13	6.11416e-12	0.695899	0.0466931	0.0961046	-6.82933	6.11416e-12	1.61989	0.0961046	83.8286
putative glycerophosphodiester phosphodiesterase	COG0584	Lipid transport and metabolism	NP_390298.2	-	yqiK	-	2514169	2514900	732	CDS	4.60011	0.425796	0.214596	0.314785	0.695243	0.0435546	0.0911738	1.34331	0.314785	1.61916	0.0911738	18.3113
major catalase in spores	COG0753	Inorganic ion transport and metabolism	NP_391742.1	-	katX	+	3964997	3966640	1644	CDS	6.79161	0.180562	0.63938	0.731101	0.694829	0.0725767	0.137993	1.13333	0.731101	1.61869	0.137993	94.9784
membrane associated ATPase for DNA competence	COG2804	Cell motility|Intracellular trafficking, secretion, and vesicular transport|Extracellular structures	NP_390353.1	-	comGA	-	2559007	2560077	1071	CDS	2.0105	0.531891	0.303632	0.414842	0.694192	0.186574	0.290108	1.44582	0.414842	1.61798	0.290108	2.76576
conserved hypothetical protein	undefined	undefined	NP_388093.1	1	ybyB	-	230819	231079	261	CDS	8.25001	0.567019	0.218298	0.318336	0.693713	0.132743	0.222827	1.48146	0.318336	1.61744	0.222827	204.427
putative FAD-dependent disulfide oxidoreductase	COG0492	Posttranslational modification, protein turnover, chaperones	NP_390176.2	-	ypdA	-	2400984	2401958	975	CDS	7.83729	0.641826	0.0250931	0.0549665	0.693619	0.0156557	0.0396979	1.5603	0.0549665	1.61734	0.0396979	159.645
putative efflux transporter	COG2814	Carbohydrate transport and metabolism	NP_388735.1	yes	yfhI	+	926886	928079	1194	CDS	7.20482	1.06558	0.00227325	0.00707481	0.692223	0.0464592	0.0956925	2.09301	0.00707481	1.61577	0.0956925	95.9746
conserved hypothetical protein	undefined	undefined	NP_388670.1	1	yfkI	+	862492	862812	321	CDS	7.52021	0.345379	0.469041	0.581169	0.691876	0.148435	0.243049	1.27048	0.581169	1.61538	0.243049	118.381
conserved hypothetical protein	COG3386	Carbohydrate transport and metabolism	NP_391200.1	-	yvrE	-	3405664	3406542	879	CDS	7.6822	0.207044	0.62063	0.715843	0.690848	0.100073	0.178067	1.15432	0.715843	1.61423	0.178067	163.36
expressed polypeptide of unknown function	undefined	undefined		?	yrpDX	+	2740769	2740846	78	CDS	3.20324	1.45807	5.50069e-05	0.000270747	0.689593	0.0664017	0.128272	2.74741	0.000270747	1.61283	0.128272	4.6617
putative metabolite dehydrogenase, NAD-binding	COG0300	General function prediction only	NP_390259.1	-	yqjQ	-	2471002	2471781	780	CDS	5.368	0.0514654	0.863592	0.907822	0.689256	0.0216195	0.0517179	1.03632	0.907822	1.61245	0.0517179	33.1552
conserved hypothetical protein	undefined	undefined	NP_388508.1	-	ydjO	-	681255	681464	210	CDS	6.80634	-0.574441	0.0476492	0.0929215	0.688435	0.0173548	0.0430495	-1.4891	0.0929215	1.61153	0.0430495	104.262
preprotein translocase subunit	COG1314	Intracellular trafficking, secretion, and vesicular transport	NP_391243.1	yes	secG	-	3455093	3455323	231	CDS	9.34275	-0.344187	0.297007	0.4079	0.687241	0.0379164	0.0815326	-1.26944	0.4079	1.6102	0.0815326	604.57
Zn(II) transporter (ATP-binding protein)	COG1121	Inorganic ion transport and metabolism	NP_388168.1	-	znuC	+	309347	310042	696	CDS	6.8128	1.7193	1.1546e-07	1.06989e-06	0.685148	0.0320188	0.0710086	3.29276	1.06989e-06	1.60787	0.0710086	52.9922
tRNA-Gln	undefined	undefined			trnS-Gln	+	528986	529060	75	tRNA	3.05936	-1.48019	0.000472824	0.00181227	0.68447	0.0816594	0.150657	-2.78986	0.00181227	1.60711	0.150657	9.23917
integral membrane protein possibly involved in chromosome condensation	COG0239	Cell cycle control, cell division, chromosome partitioning|Inorganic ion transport and metabolism	NP_388841.1	yes	crcBA	-	1036953	1037309	357	CDS	5.30348	-0.0580722	0.858221	0.90426	0.68319	0.035788	0.07773	-1.04107	0.90426	1.60569	0.07773	34.1097
molybdene to molybdopterin ligation enzyme	COG0303	Coenzyme transport and metabolism	NP_389311.1	-	moeA	+	1497192	1498484	1293	CDS	7.24666	0.412555	0.136173	0.222263	0.683082	0.0139575	0.0359444	1.33104	0.222263	1.60557	0.0359444	113.996
DNA polymerase/3'-5' exonuclease X	COG1387	Amino acid transport and metabolism|General function prediction only	NP_390737.1	-	polX	-	2923314	2925026	1713	CDS	7.69122	1.46662	1.31555e-06	9.44111e-06	0.682904	0.0226252	0.0535002	2.76374	9.44111e-06	1.60537	0.0535002	109.165
putative integral inner membrane protein	COG4241	Function unknown	NP_391932.1	yes	yybS	-	4165659	4166588	930	CDS	8.2147	-0.124594	0.714071	0.795038	0.681628	0.0458825	0.0948378	-1.0902	0.795038	1.60395	0.0948378	256.665
hypothetical protein	undefined	undefined	YP_003097691.1	1	yezF	-	713308	713535	228	CDS	0.146349	-0.350788	0.660026	0.749283	0.680435	0.359112	0.48065	-1.27526	0.749283	1.60262	0.48065	0.571797
conserved hypothetical protein	COG4533	Transcription	NP_388940.1	-	yhjP	+	1133498	1135225	1728	CDS	5.92594	-0.251848	0.385698	0.501298	0.678709	0.0193062	0.0471737	-1.19073	0.501298	1.60071	0.0471737	52.5648
two-component sensor histidine kinase [YrkP]	COG0642	Signal transduction mechanisms	NP_390519.1	yes	yrkQ	-	2703150	2704448	1299	CDS	3.67918	0.617069	0.0892415	0.15642	0.678238	0.0633254	0.123492	1.53376	0.15642	1.60018	0.123492	9.62908
putative glycosyl transferase	COG0463	Cell wall/membrane/envelope biogenesis	NP_388740.1	yes	csbB	+	930818	931807	990	CDS	8.49093	0.688744	0.110482	0.186946	0.67754	0.116448	0.201356	1.61188	0.186946	1.59941	0.201356	235.749
putative transcriptional regulator	COG1937	Transcription	NP_390532.1	-	yrkD	-	2713949	2714140	192	CDS	3.7262	-0.0617542	0.874316	0.915424	0.677441	0.0814826	0.150398	-1.04373	0.915424	1.5993	0.150398	12.9843
hydroxyethylthiazole kinase	COG2145	Coenzyme transport and metabolism	NP_391709.1	-	thiM	-	3931372	3932190	819	CDS	6.51448	-0.229174	0.435079	0.548893	0.677109	0.0213187	0.051134	-1.17216	0.548893	1.59893	0.051134	79.1711
2-oxoglutarate dehydrogenase (E1 subunit)	COG0567	Energy production and conversion	NP_389819.3	-	odhA	-	2108774	2111608	2835	CDS	11.6511	0.878498	0.0046005	0.0127861	0.676793	0.0285588	0.0647976	1.83846	0.0127861	1.59858	0.0647976	1938.41
putative formate dehydrogenase	COG3383	General function prediction only	NP_390600.1	-	yrhE	+	2781209	2784151	2943	CDS	6.72553	-0.333701	0.471194	0.582781	0.676698	0.145015	0.239071	-1.26024	0.582781	1.59848	0.239071	88.5578
RNA polymerase ECF (extracytoplasmic function)-type sigma factor (sigma(M))	COG1595	Transcription	NP_388833.1	-	sigM	-	1029577	1030068	492	CDS	8.18627	3.99521	9.67507e-20	6.30415e-18	0.67644	0.0869355	0.158468	15.947	6.30415e-18	1.59819	0.158468	49.8462
arabinogalactan type I oligomer exo-hydrolase (beta-galactosidase, lactase)	COG1874	Carbohydrate transport and metabolism	NP_391293.1	-	ganA	-	3503020	3505083	2064	CDS	4.45897	-0.706026	0.106813	0.181635	0.674149	0.119527	0.205391	-1.6313	0.181635	1.59566	0.205391	17.6797
putative effector of transcriptional regulator	COG3708	Transcription	NP_389790.1	-	yobU	-	2082531	2083013	483	CDS	0.893158	0.346723	0.563399	0.667076	0.672973	0.261398	0.376992	1.27167	0.667076	1.59435	0.376992	1.2374
hypothetical protein	undefined	undefined	NP_391862.1	yes	yxcA	-	4091477	4091728	252	CDS	4.86071	-0.581984	0.0699797	0.12769	0.668336	0.0353426	0.0770072	-1.49691	0.12769	1.58924	0.0770072	27.86
peptidyl-tRNA hydrolase	COG0193	Translation, ribosomal structure and biogenesis	NP_387934.1	-	pth	+	59504	60070	567	CDS	7.15192	-1.06695	0.00076984	0.00278186	0.668038	0.0333326	0.0733282	-2.095	0.00278186	1.58891	0.0733282	153.361
glucose-1-phosphate adenylyltransferase (ADP-glucose pyrophosphorylase) subunit alpha	COG0448	Carbohydrate transport and metabolism			glgC	-	3168624	3169766	1143	CDS	1.89523	-1.3847	0.00168869	0.005506	0.667616	0.0831766	0.153044	-2.61117	0.005506	1.58845	0.153044	4.05521
conserved hypothetical protein	undefined	undefined	NP_389811.1	-	yozO	-	2099446	2099790	345	CDS	5.94497	-0.109953	0.770736	0.83656	0.666328	0.0782393	0.14612	-1.07919	0.83656	1.58703	0.14612	57.5607
tRNA-Leu	undefined	undefined			trnJ-Leu1	+	95649	95731	83	tRNA	2.38455	-1.27581	0.0012604	0.0042654	0.66616	0.063867	0.124135	-2.42135	0.0042654	1.58684	0.124135	5.95424
stress response protein	COG3237	Function unknown	NP_391548.1	-	csbD	-	3770104	3770292	189	CDS	6.47936	0.547523	0.248958	0.354482	0.665596	0.161916	0.260347	1.46157	0.354482	1.58622	0.260347	71.3294
putative phosphoesterase	COG1408	General function prediction only	NP_390179.1	1	ypbG	-	2404249	2405028	780	CDS	5.94349	3.82028	6.72985e-15	2.10886e-13	0.665068	0.144464	0.23845	14.126	2.10886e-13	1.58564	0.23845	11.6422
putative iron-sulfur scaffold protein	COG0694	Posttranslational modification, protein turnover, chaperones			yutI	+	3310386	3310721	336	CDS	9.8664	1.29252	8.05805e-05	0.000379338	0.662915	0.0408913	0.0865251	2.44956	0.000379338	1.58328	0.0865251	491.36
conserved hypothetical protein, phage SPbeta	undefined	undefined	NP_389926.1	-	yorB	-	2187819	2188115	297	CDS	3.55155	0.631101	0.10408	0.177282	0.662891	0.0914231	0.165181	1.54875	0.177282	1.58325	0.165181	7.96515
C4-dicarboxylate transport protein	COG1301	Energy production and conversion	NP_388328.1	yes	dctP	+	500166	501431	1266	CDS	9.1449	-0.744697	0.21882	0.318983	0.661612	0.273978	0.391465	-1.67562	0.318983	1.58185	0.391465	397.755
phosphotransferase system (PTS) trehalose-specific enzyme IIBC component	COG1263	Carbohydrate transport and metabolism	NP_388661.1	yes	treP	+	850367	851779	1413	CDS	12.0109	0.98221	0.0057596	0.0154994	0.659223	0.0625233	0.12216	1.97549	0.0154994	1.57923	0.12216	2182.97
cytochrome aa(3) assembly factor	COG3336	Energy production and conversion|Posttranslational modification, protein turnover, chaperones	NP_389376.1	yes	ctaG	+	1564422	1565315	894	CDS	4.10614	0.0148761	0.962968	0.977011	0.65853	0.0396587	0.0843956	1.01036	0.977011	1.57847	0.0843956	14.8888
tagaturonate reductase (altronate oxidoreductase)	COG0246	Carbohydrate transport and metabolism	NP_389120.1	-	uxaB	+	1309880	1311322	1443	CDS	2.49664	0.648842	0.108057	0.183371	0.657762	0.109861	0.191825	1.56791	0.183371	1.57763	0.191825	3.71086
putative RNA pseudouridine synthase	COG0564	Translation, ribosomal structure and biogenesis	NP_388802.2	-	yhcT	-	995624	996532	909	CDS	5.91771	1.94961	1.09161e-11	2.04614e-10	0.657303	0.0214302	0.0513248	3.8627	2.04614e-10	1.57713	0.0513248	24.8714
putative efflux transporter	COG0477	Carbohydrate transport and metabolism|Amino acid transport and metabolism|Inorganic ion transport and metabolism|General function prediction only	NP_388672.1	yes	yfkF	-	863862	865037	1176	CDS	4.37991	-0.301809	0.303103	0.414842	0.656417	0.0236342	0.0554075	-1.23269	0.414842	1.57616	0.0554075	18.2584
two-component sensor histidine kinase [YxjL]	COG4585	Signal transduction mechanisms	NP_391769.1	1	yxjM	+	3993162	3994382	1221	CDS	5.29846	-1.31831	0.000203892	0.000860201	0.655649	0.0581724	0.115417	-2.49374	0.000860201	1.57532	0.115417	44.7132
branched-chain amino acid dehydrogenase	COG0334	Amino acid transport and metabolism	NP_390288.1	-	bcd	-	2502659	2503753	1095	CDS	7.82566	0.36455	0.254174	0.361032	0.655105	0.0411274	0.0868904	1.28748	0.361032	1.57473	0.0868904	140.174
putative lactate permease	COG1620	Energy production and conversion	NP_391299.1	yes	yvfH	+	3510780	3512471	1692	CDS	7.95456	-1.58806	1.00689e-06	7.46077e-06	0.653988	0.0394104	0.0839637	-3.00645	7.46077e-06	1.57351	0.0839637	289.97
2-C-methyl-D-erythritol-2,4-cyclodiphosphate synthase	COG0245	Lipid transport and metabolism	NP_387972.1	-	ispF	+	110480	110956	477	CDS	6.64705	-0.912684	0.0222752	0.0495608	0.653479	0.0993792	0.177216	-1.88254	0.0495608	1.57296	0.177216	101.416
transcriptional regulator (LysR family)	COG0583	Transcription	NP_389724.1	-	ftsR	-	2006541	2007398	858	CDS	4.6241	1.92173	2.19321e-08	2.30259e-07	0.65249	0.0584751	0.11588	3.78876	2.30259e-07	1.57188	0.11588	12.0862
putative acetyl-CoA C-acetyltransferase	COG0183	Lipid transport and metabolism	NP_388916.1	1	yhfS	-	1109388	1110482	1095	CDS	3.93465	-0.403074	0.232318	0.335129	0.651281	0.0501161	0.10225	-1.32232	0.335129	1.57056	0.10225	13.4999
tRNA-Glu	undefined	undefined			trnSL-Glu1	+	70267	70338	72	tRNA	0.548082	-3.06237	5.35025e-05	0.000264293	0.650865	0.198865	0.305402	-8.35342	0.000264293	1.57011	0.305402	1.53748
putative ABC protein involved in RecA-independent precise excision of transposons	COG0488	General function prediction only	NP_388618.1	-	uup	+	809557	811446	1890	CDS	7.65479	0.301324	0.331021	0.443631	0.65073	0.0364472	0.078953	1.23227	0.443631	1.56996	0.078953	147.737
two-component sensor histidine kinase	COG3852	Signal transduction mechanisms	NP_389332.1	yes	kinC	+	1518333	1519619	1287	CDS	6.10797	-0.00549593	0.98554	0.99114	0.650697	0.0322711	0.071337	0.996198	0.99114	1.56993	0.071337	58.0246
putative degradative enzyme	COG3480	Signal transduction mechanisms	NP_389388.2	1	ylbL	+	1572765	1573790	1026	CDS	6.31254	0.356627	0.231914	0.334743	0.650538	0.0297238	0.067005	1.28043	0.334743	1.56975	0.067005	54.8542
member of the processed secretome	undefined	undefined	NP_391660.1	1	yweA	-	3882191	3882655	465	CDS	5.79567	-1.42001	0.000863608	0.00307468	0.649616	0.119289	0.205251	-2.67587	0.00307468	1.56875	0.205251	62.9176
putative transporter	COG0679	General function prediction only	NP_391585.1	yes	ywkB	-	3799377	3800336	960	CDS	4.56351	-0.287716	0.368402	0.483778	0.649291	0.0408753	0.0865251	-1.22071	0.483778	1.5684	0.0865251	20.955
peptidase T (tripeptidase)	COG2195	Amino acid transport and metabolism	NP_391771.1	-	pepT	+	3995075	3996307	1233	CDS	7.10226	0.0546327	0.858963	0.904695	0.649153	0.0354014	0.0770397	1.03859	0.904695	1.56825	0.0770397	111.093
putative ABC transporter (permease)	COG0842	Defense mechanisms	NP_391288.1	-	yvfS	-	3497614	3498351	738	CDS	0.164241	0.242165	0.724295	0.802898	0.648779	0.338935	0.46035	1.18277	0.802898	1.56784	0.46035	0.629578
glycine decarboxylase (subunit 1) (glycine cleavage system protein P)	COG0403	Amino acid transport and metabolism	NP_390336.2	-	gcvPA	-	2546869	2548215	1347	CDS	5.14174	1.20942	0.00117819	0.00403377	0.647361	0.0824663	0.151941	2.31244	0.00403377	1.5663	0.151941	23.6618
putative integral inner membrane protein involved in export murein hydrolases	COG1380	General function prediction only	YP_003097798.1	yes	yxzK	+	4109843	4110247	405	CDS	2.58821	-0.380612	0.307227	0.418298	0.647238	0.0709326	0.135403	-1.30189	0.418298	1.56617	0.135403	5.11588
conserved hypothetical protein	undefined	undefined	YP_003097709.1	-	yjzH	-	1278205	1278399	195	CDS	4.99297	-2.52961	1.35455e-08	1.49474e-07	0.644884	0.118756	0.204743	-5.77416	1.49474e-07	1.56361	0.204743	40.8963
inhibitor of cell-separation enzymes	undefined	undefined	NP_389720.2	1	iseA	+	2002637	2003182	546	CDS	8.7112	-3.31743	1.28053e-12	2.82613e-11	0.644772	0.131986	0.221868	-9.96884	2.82613e-11	1.56349	0.221868	578.185
conserved hypothetical protein	COG2340	Function unknown	NP_389280.2	1	ykwD	-	1466638	1467411	774	CDS	2.90932	0.910979	0.0260266	0.0565587	0.644477	0.124027	0.211082	1.88032	0.0565587	1.56317	0.211082	4.77094
stage III sporulation ratchet engulfment protein	undefined	undefined	NP_390316.2	1	spoIIIAH	-	2532353	2533009	657	CDS	0.516395	-0.796416	0.2352	0.338414	0.644448	0.28658	0.403434	-1.73678	0.338414	1.56314	0.403434	1.06493
small acid-soluble spore protein (alpha/beta-type SASP)	undefined	undefined	NP_389230.1	-	sspD	-	1413800	1413994	195	CDS	0.289568	-0.415651	0.555829	0.659635	0.643888	0.317945	0.437619	-1.3339	0.659635	1.56253	0.437619	0.739704
response regulator aspartate phosphatase	COG0457	General function prediction only	NP_389125.1	-	rapA	+	1315869	1317005	1137	CDS	6.1154	-1.26948	0.000869542	0.00309045	0.643878	0.0858378	0.156815	-2.41074	0.00309045	1.56252	0.156815	82.6342
putative hydrolase involved in subtilosin production	COG0612	General function prediction only	NP_391621.1	-	albE	+	3839852	3841012	1161	CDS	4.21381	-0.693658	0.0277724	0.0595952	0.641894	0.0372854	0.0803758	-1.61738	0.0595952	1.56038	0.0803758	18.8474
putative decarboxylase	COG1982	Amino acid transport and metabolism	NP_387908.1	-	yaaO	+	37720	39162	1443	CDS	7.09341	1.35098	4.2958e-06	2.74677e-05	0.639576	0.028316	0.0643616	2.55086	2.74677e-05	1.55787	0.0643616	77.3832
conserved hypothetical protein	COG4485	Function unknown	NP_388741.2	yes	yfhO	+	931879	934464	2586	CDS	8.03414	-0.525431	0.20378	0.301774	0.638788	0.122525	0.209219	-1.43936	0.301774	1.55702	0.209219	241.853
uracil permease	COG2233	Nucleotide transport and metabolism	NP_389431.2	yes	pyrP	+	1619023	1620330	1308	CDS	10.1569	1.84496	0.0659962	0.121705	0.636283	0.514549	0.634269	3.59244	0.121705	1.55432	0.634269	382.194
conserved hypothetical protein	undefined	undefined	NP_389377.1	-	ylbA	-	1565347	1565709	363	CDS	5.35366	0.766497	0.0265996	0.0574994	0.635549	0.0675609	0.129718	1.70113	0.0574994	1.55353	0.129718	25.626
putative antilisterial bacteriocin (subtilosin) production enzyme	COG0535	General function prediction only	NP_391617.1	-	albA	+	3836323	3837669	1347	CDS	7.18846	-0.728498	0.00769318	0.0197132	0.634093	0.019769	0.0482472	-1.65691	0.0197132	1.55196	0.0482472	154.913
putative short-chain acyl dehydrogenase	COG1028	Lipid transport and metabolism|Secondary metabolites biosynthesis, transport and catabolism|General function prediction only			yusZ	+	3382633	3383475	843	CDS	2.66214	-0.236134	0.531451	0.636966	0.631374	0.0884747	0.160917	-1.17783	0.636966	1.54904	0.160917	5.79324
conserved hypothetical protein	undefined	undefined	NP_391394.1	-	yvkN	+	3608991	3609221	231	CDS	1.13361	-0.226069	0.686055	0.770534	0.63109	0.242287	0.355592	-1.16964	0.770534	1.54873	0.355592	1.88932
histidine ammonia-lyase (histidase)	COG2986	Amino acid transport and metabolism	NP_391814.1	-	hutH	+	4042051	4043577	1527	CDS	1.31219	-1.67332	0.000877836	0.00311453	0.629961	0.133751	0.224009	-3.18947	0.00311453	1.54752	0.224009	2.80723
oligopeptide ABC transporter (ATP-binding protein)	COG4608	Amino acid transport and metabolism	NP_389029.1	-	oppF	+	1224533	1225450	918	CDS	4.96612	-0.759845	0.0337769	0.069992	0.629075	0.0756568	0.142726	-1.69331	0.069992	1.54657	0.142726	34.6424
multiple sugar-binding transporter ATP-binding protein	COG3842	Amino acid transport and metabolism	NP_391760.1	-	msmX	-	3984133	3985230	1098	CDS	6.09689	-0.621593	0.0908002	0.158341	0.628776	0.0860879	0.157132	-1.53857	0.158341	1.54625	0.157132	58.8497
enzyme involved in biofilm formation	COG0673	General function prediction only			yulF	+	3196906	3197892	987	CDS	6.81386	-0.87117	0.00336789	0.009826	0.6281	0.0330657	0.0728583	-1.82915	0.009826	1.54553	0.0728583	113.305
putative integral inner membrane protein	COG2962	Function unknown	NP_389830.2	yes	yojE	-	2123026	2123922	897	CDS	5.65292	-1.6786	5.47106e-07	4.35246e-06	0.627144	0.0518856	0.1053	-3.20118	4.35246e-06	1.5445	0.1053	58.2288
conserved hypothetical protein	COG4405	Function unknown	NP_388902.1	-	yhfF	+	1096116	1096523	408	CDS	5.81859	0.593556	0.0345939	0.0713014	0.627112	0.02644	0.0608727	1.50896	0.0713014	1.54447	0.0608727	36.8881
putative late competence gene	undefined	undefined	NP_389013.1	-	comZ	+	1207597	1207788	192	CDS	6.49992	0.985584	0.000502881	0.00191318	0.626895	0.026994	0.0619397	1.98011	0.00191318	1.54424	0.0619397	56.1739
putative DNA wielding protein, skin element	undefined	undefined	NP_390492.2	-	yqbD	-	2684161	2685129	969	CDS	0.341196	-1.14848	0.169875	0.261533	0.626137	0.419836	0.543497	-2.2168	0.261533	1.54343	0.543497	1.10184
conserved hypothetical protein	undefined	undefined	NP_387886.2	-	yaaB	+	4567	4812	246	CDS	5.82348	-0.604723	0.0782488	0.140267	0.625591	0.067165	0.129442	-1.52069	0.140267	1.54284	0.129442	57.3263
thiamine pyrophosphate riboswitch	undefined	undefined			tswB	-	1391739	1391851	113	No_CDS	2.36631	1.12539	0.0102831	0.0253221	0.62548	0.169476	0.269337	2.1816	0.0253221	1.54272	0.269337	3.28831
small untranslated RNA expressed under sporulation conditions	undefined	undefined			surF	+	2773783	2773883	101	No_CDS	0.178065	3.77661	0.000143093	0.000630929	0.625017	0.665393	0.762332	13.7049	0.000630929	1.54223	0.762332	0.0683681
putative excisionase	undefined	undefined	NP_389722.1	-	yoeD	-	2004262	2004492	231	CDS	3.18449	1.17735	0.00171218	0.00556492	0.624724	0.105576	0.185924	2.26161	0.00556492	1.54192	0.185924	5.33274
cell-division protein	COG4839	Cell cycle control, cell division, chromosome partitioning	NP_389398.1	1	ftsL	+	1581597	1581950	354	CDS	6.94247	0.739498	0.0127284	0.030502	0.624332	0.0356776	0.0775314	1.6696	0.030502	1.5415	0.0775314	82.703
tRNA-Leu	undefined	undefined			trnS-Leu1	+	529174	529255	82	tRNA	5.77493	-1.58468	5.17147e-05	0.000257175	0.624165	0.100886	0.179202	-2.99941	0.000257175	1.54132	0.179202	68.6716
isopentenyl diphosphate isomerase	COG1304	Energy production and conversion|Lipid transport and metabolism|General function prediction only	NP_390168.3	-	fni	-	2393602	2394651	1050	CDS	7.47736	0.300617	0.281961	0.391691	0.623703	0.0260648	0.0602115	1.23167	0.391691	1.54082	0.0602115	132.55
beta-ketoacyl-acyl carrier protein synthase III 2	COG0332	Lipid transport and metabolism	NP_388898.1	1	fabHB	-	1092770	1093747	978	CDS	5.78313	0.437882	0.353374	0.468087	0.623166	0.188322	0.291965	1.35461	0.468087	1.54025	0.291965	41.91
putative aldehyde dehydrogenase	COG1012	Energy production and conversion	NP_391675.2	-	ywdH	+	3896290	3897660	1371	CDS	4.7137	-1.19647	0.000198899	0.000842224	0.621705	0.045759	0.0946301	-2.29178	0.000842224	1.53869	0.0946301	28.6855
protein deacetylase	COG0123	Chromatin structure and dynamics|Secondary metabolites biosynthesis, transport and catabolism			acuC	+	3041392	3042555	1164	CDS	5.87057	0.23	0.43286	0.547307	0.621302	0.0348199	0.0761106	1.17283	0.547307	1.53826	0.0761106	40.5577
putative aspartate aminotransferase	COG0436	Amino acid transport and metabolism	NP_388838.1	-	yhdR	+	1034046	1035227	1182	CDS	5.47706	-0.815636	0.00623742	0.0165191	0.620867	0.0350439	0.0764375	-1.76007	0.0165191	1.5378	0.0764375	49.6379
hypothetical protein	undefined	undefined	NP_389325.1	yes	ykoA	-	1511923	1512192	270	CDS	5.59079	-0.0349423	0.910181	0.938478	0.620014	0.0455598	0.0944456	-1.02452	0.938478	1.53689	0.0944456	38.9659
T-box riboswitch specific of leucine tRNA ligase	undefined	undefined			tboL	-	3105153	3105367	215	No_CDS	7.58001	-0.37079	0.212791	0.312302	0.61998	0.0373988	0.0805044	-1.29306	0.312302	1.53685	0.0805044	173.941
putative integral membrane protein	COG1286	Function unknown	NP_390738.1	yes	yshB	-	2925100	2925633	534	CDS	6.78557	2.15851	2.46785e-12	5.16864e-11	0.619805	0.0391493	0.0836149	4.46452	5.16864e-11	1.53667	0.0836149	45.368
putative N-acetyltransferase	COG0456	Translation, ribosomal structure and biogenesis	NP_391909.1	-	yycN	-	4139679	4140149	471	CDS	2.81232	-0.0583484	0.865974	0.909274	0.61844	0.0698817	0.133736	-1.04127	0.909274	1.53521	0.133736	6.00834
putative transcriptional regulator	COG1510	Transcription	NP_391264.1	-	yvbF	+	3471266	3471823	558	CDS	4.28908	2.51405	1.44376e-13	3.68113e-12	0.617136	0.0778737	0.145597	5.7122	3.68113e-12	1.53383	0.145597	6.97771
spore cortex-lytic enzyme	COG3409	Cell wall/membrane/envelope biogenesis	NP_390174.1	1	sleB	-	2399152	2400069	918	CDS	1.31336	2.22323	0.0355576	0.0728363	0.616987	0.567868	0.682405	4.66938	0.0728363	1.53367	0.682405	0.61326
putative exported protein	COG3212	Function unknown	NP_389211.1	yes	ykoJ	+	1394776	1395288	513	CDS	4.5708	1.37862	3.68635e-05	0.000190345	0.61695	0.0673457	0.129562	2.60019	0.000190345	1.53363	0.129562	13.6471
nitrate reductase molybdenum cofactor assembly chaperone NarJ	COG2180	Energy production and conversion|Inorganic ion transport and metabolism|Posttranslational modification, protein turnover, chaperones	NP_391607.1	-	narJ	-	3824226	3824780	555	CDS	1.07803	-1.42567	0.0272709	0.0586146	0.616786	0.285535	0.402247	-2.68639	0.0586146	1.53346	0.402247	2.05723
conserved hypothetical protein	undefined	undefined			ytpB	-	3121538	3122641	1104	CDS	8.29118	0.812029	0.00345544	0.0100528	0.616587	0.0261934	0.0603728	1.75568	0.0100528	1.53324	0.0603728	207.717
conserved hypothetical protein, genus orphan	undefined	undefined	YP_003097702.1	-	yizC	-	1190036	1190233	198	CDS	4.1987	1.11663	0.00155627	0.00513132	0.616253	0.0857216	0.1568	2.1684	0.00513132	1.53289	0.1568	9.84962
conserved hypothetical protein	undefined	undefined			yugE	-	3228431	3228691	261	CDS	3.93415	-0.439928	0.223081	0.323814	0.615293	0.0845446	0.155143	-1.35654	0.323814	1.53187	0.155143	13.9176
putative oxidoreductase	COG1028	Lipid transport and metabolism|Secondary metabolites biosynthesis, transport and catabolism|General function prediction only	NP_391863.2	-	yxbG	+	4091845	4092666	822	CDS	6.55717	0.555011	0.307961	0.41888	0.614816	0.259408	0.374823	1.46918	0.41888	1.53136	0.374823	71.8027
putative UV damage repair endonuclease	COG4294	Replication, recombination and repair	NP_391601.1	-	ywjD	+	3817863	3818825	963	CDS	0.165177	-0.130358	0.849638	0.897058	0.614644	0.351923	0.473499	-1.09457	0.897058	1.53118	0.473499	0.687948
component of the germination receptor GerA	COG0814	Amino acid transport and metabolism			gerAB	+	3392199	3393296	1098	CDS	0.461725	-0.0194909	0.9734	0.983946	0.614181	0.276312	0.393704	-1.0136	0.983946	1.53069	0.393704	1.05464
tRNA-Met	undefined	undefined			trnB-Met3	-	3172793	3172869	77	tRNA	0.369737	-2.46518	0.00121221	0.00413011	0.613181	0.274568	0.392035	-5.52196	0.00413011	1.52963	0.392035	1.33209
putative acylphosphatase	COG1254	Energy production and conversion	NP_388645.1	-	yflL	-	837735	838010	276	CDS	2.58113	-0.194231	0.607675	0.705459	0.611451	0.0971322	0.174269	-1.14411	0.705459	1.52779	0.174269	4.54981
putative tautomerase	COG1942	Secondary metabolites biosynthesis, transport and catabolism	NP_389834.1	-	yodA	+	2126549	2126938	390	CDS	2.42651	-0.306251	0.428603	0.543869	0.610783	0.104224	0.183938	-1.23649	0.543869	1.52709	0.183938	4.65362
oligopeptide ABC transporter (permease)	COG0601	Amino acid transport and metabolism|Inorganic ion transport and metabolism	NP_389021.2	yes	appB	+	1215243	1216193	951	CDS	2.18358	-0.628762	0.0891333	0.156297	0.608591	0.0801021	0.148125	-1.54624	0.156297	1.52477	0.148125	4.77521
beta-galacturonidase	COG1874	Carbohydrate transport and metabolism	NP_388589.1	-	rhgZ	+	774799	776790	1992	CDS	2.61708	-0.257044	0.524367	0.631425	0.608217	0.123609	0.210546	-1.19503	0.631425	1.52437	0.210546	4.66994
putative ABC transporter component	COG0845	Cell wall/membrane/envelope biogenesis|Defense mechanisms	NP_391209.1	1	yvrP	-	3414023	3415216	1194	CDS	5.51146	-2.22588	3.11192e-06	2.03739e-05	0.607698	0.179345	0.28175	-4.67796	2.03739e-05	1.52383	0.28175	53.7287
tRNA(NNU) t(6)A37 threonylcarbamoyladenosine modification, threonine-dependent ADP-forming ATPase	COG0009	Translation, ribosomal structure and biogenesis	NP_391576.1	-	tsaC	-	3792969	3794009	1041	CDS	7.24321	-1.43048	3.03955e-05	0.000160377	0.60764	0.0707921	0.135289	-2.69536	0.000160377	1.52376	0.135289	186.343
conserved hypothetical protein, putative PBSX prophage protein	undefined	undefined	NP_389158.1	-	xkdV	+	1343230	1345293	2064	CDS	4.66297	1.74804	1.3723e-05	7.69577e-05	0.606737	0.128904	0.217579	3.35901	7.69577e-05	1.52281	0.217579	13.8725
oxidoreductase, NAD(P)H-FMN and ferric iron reductase	COG0431	Energy production and conversion	NP_388815.1	-	yhdA	+	1010445	1010969	525	CDS	3.49027	-0.155503	0.623634	0.718132	0.606087	0.0530956	0.107157	-1.11381	0.718132	1.52213	0.107157	9.45147
component of the piezosome (stressosome), positive regulation of sigma(B) activity in response to	COG1366	Signal transduction mechanisms	NP_388348.1	-	rsbRA	+	519408	520232	825	CDS	6.68738	0.587819	0.0340908	0.0703938	0.605961	0.0293395	0.0662479	1.50297	0.0703938	1.52199	0.0662479	76.0389
NAD-dependent malic enzyme (conversion of malate into pyruvate)	COG0281	Energy production and conversion	NP_391586.1	-	maeA	-	3800418	3802166	1749	CDS	5.9534	-0.192341	0.528286	0.634141	0.605324	0.0473857	0.0973077	-1.14262	0.634141	1.52132	0.0973077	57.1758
conserved hypothetical protein	COG3876	Function unknown	NP_388046.1	1	ybbC	-	185194	186438	1245	CDS	2.73784	0.566384	0.186346	0.281232	0.604067	0.165941	0.265363	1.48081	0.281232	1.52	0.265363	4.1055
putative integral inner membrane protein	COG1288	General function prediction only	NP_388184.2	yes	ycgA	+	325339	326772	1434	CDS	4.16206	-0.76809	0.0209039	0.0469936	0.603507	0.0624784	0.12213	-1.70301	0.0469936	1.51941	0.12213	16.0029
conserved hypothetical protein	undefined	undefined	NP_390371.1	-	yqgL	-	2575717	2576187	471	CDS	1.68862	0.404597	0.407563	0.523154	0.602468	0.219511	0.329828	1.32372	0.523154	1.51831	0.329828	2.07208
regulatory RNA controlling iron-dependent metabolism	undefined	undefined			fsrA	+	1483557	1483640	84	No_CDS	4.57308	0.0317534	0.937545	0.958561	0.600974	0.137552	0.229439	1.02225	0.958561	1.51674	0.229439	17.461
putative ABC transporter (binding lipoprotein)	COG1464	Inorganic ion transport and metabolism	NP_388792.2	1	yhcJ	+	984901	985731	831	CDS	6.94593	-0.715811	0.0115751	0.0280825	0.598485	0.0337632	0.0741166	-1.64241	0.0280825	1.51413	0.0741166	122.263
gluconeogenesis morphogenetic factor	COG0391	Coenzyme transport and metabolism|Carbohydrate transport and metabolism	NP_391356.2	-	mgfK	-	3570546	3571499	954	CDS	7.62891	0.272418	0.327467	0.439441	0.596437	0.0325827	0.0719097	1.20783	0.439441	1.51198	0.0719097	157.357
conserved hypothetical protein	COG4991	Function unknown	NP_390570.1	1	yraI	-	2751292	2751651	360	CDS	3.08927	-0.580563	0.11085	0.187491	0.595435	0.0913231	0.165073	-1.49543	0.187491	1.51093	0.165073	8.00662
putative efflux transporter	COG2814	Carbohydrate transport and metabolism	NP_388719.1	yes	yfiS	-	912547	913800	1254	CDS	3.11696	-0.358819	0.299544	0.410561	0.595166	0.0789154	0.146583	-1.28238	0.410561	1.51065	0.146583	8.29729
membrane platform component of the DNA transport machinery	COG1459	Cell motility|Intracellular trafficking, secretion, and vesicular transport|Extracellular structures	NP_390352.1	yes	comGB	-	2557983	2558954	972	CDS	0.773606	0.02602	0.967182	0.979606	0.593194	0.346681	0.467518	1.0182	0.979606	1.50858	0.467518	1.23284
ADP-ribose pyrophosphatase	COG0494	Defense mechanisms	NP_390242.1	-	nudF	-	2458509	2459066	558	CDS	5.78951	-0.0550315	0.84268	0.892413	0.591397	0.0331208	0.0729404	-1.03888	0.892413	1.50671	0.0729404	47.573
putative transcriptional regulator (LysR family)	COG0583	Transcription			yusT	+	3377893	3378780	888	CDS	4.45272	-0.354904	0.257081	0.364028	0.590682	0.0574801	0.114209	-1.2789	0.364028	1.50596	0.114209	20.8986
anthranilate synthase	COG0147	Amino acid transport and metabolism|Coenzyme transport and metabolism	NP_390149.1	-	trpE	-	2375869	2377416	1548	CDS	7.57121	5.54818	2.69024e-33	9.20287e-31	0.589468	0.143177	0.237089	46.7916	9.20287e-31	1.50469	0.237089	11.7701
tRNA-Leu	undefined	undefined			trnB-Leu1	-	3173404	3173490	87	tRNA	0.576308	-1.44649	0.0246132	0.0540884	0.588433	0.28758	0.404563	-2.72545	0.0540884	1.50361	0.404563	1.46455
putative transcriptional regulator	COG1510	Transcription			yuaC	+	3186763	3187305	543	CDS	4.10857	0.709297	0.038785	0.0780835	0.586958	0.0897957	0.163175	1.63501	0.0780835	1.50208	0.163175	12.8963
oligoendopeptidase, C-terminal part of YusY	undefined	undefined			yusY	-	3380704	3382212	1509	CDS	5.91064	-0.225968	0.462311	0.574514	0.586927	0.0563396	0.112359	-1.16956	0.574514	1.50204	0.112359	59.6684
lipoyl synthase (lipoic acid synthetase)	COG0320	Coenzyme transport and metabolism			lipA	-	3320324	3321220	897	CDS	8.70323	0.550303	0.0795195	0.14211	0.585967	0.0621353	0.121691	1.46439	0.14211	1.50104	0.121691	287.312
excinuclease ABC (subunit C)	COG0322	Replication, recombination and repair	NP_390727.2	-	uvrC	-	2911116	2912888	1773	CDS	6.2782	1.0194	0.000422636	0.00163672	0.584389	0.0432046	0.0905796	2.02707	0.00163672	1.4994	0.0905796	50.6765
putative transcriptional regulator	COG1733	Transcription	NP_391248.2	-	yvaP	+	3457615	3457941	327	CDS	5.56155	-0.24335	0.395942	0.511435	0.583875	0.0414236	0.0874263	-1.18374	0.511435	1.49887	0.0874263	45.2981
conserved hypothetical protein	undefined	undefined	NP_390291.1	yes	yqzF	+	2507020	2507256	237	CDS	4.32568	1.04289	0.0066095	0.0173257	0.582146	0.132377	0.222423	2.06035	0.0173257	1.49707	0.222423	12.9727
putative RNA binding protein	COG2501	Translation, ribosomal structure and biogenesis	NP_387884.1	-	yaaA	+	3206	3421	216	CDS	6.33009	-0.447718	0.235996	0.339215	0.581639	0.123382	0.210246	-1.36388	0.339215	1.49655	0.210246	84.4889
conserved hypothetical protein	COG4838	Function unknown	NP_389367.1	-	ylaN	+	1552412	1552693	282	CDS	8.5614	1.72375	2.60781e-05	0.000139753	0.5813	0.146763	0.241252	3.30294	0.000139753	1.4962	0.241252	185.478
positive regulator of comK	COG1744	Cell wall/membrane/envelope biogenesis	NP_389012.2	1	med	+	1206629	1207582	954	CDS	8.33812	1.06688	0.000409122	0.00158738	0.580441	0.0530815	0.107157	2.09489	0.00158738	1.49531	0.107157	213.54
4-aminobutyrate aminotransferase	COG0160	Amino acid transport and metabolism	NP_388272.1	-	gabT	+	441571	442881	1311	CDS	2.33223	-0.45652	0.293594	0.40416	0.579048	0.167792	0.267178	-1.37223	0.40416	1.49386	0.267178	4.30722
conserved hypothetical protein	undefined	undefined			yueH	-	3262009	3262257	249	CDS	4.71453	-0.0135973	0.962129	0.9764	0.578686	0.0432268	0.0905798	-1.00947	0.9764	1.49349	0.0905798	24.0056
putative UTP-glucose-1-phosphate uridylyltransferase	COG1210	Cell wall/membrane/envelope biogenesis			ytdA	-	3154735	3155553	819	CDS	1.70755	0.131741	0.753885	0.821796	0.577739	0.164176	0.26295	1.09562	0.821796	1.49251	0.26295	2.34556
putative hydrolase subunit antagonist of KipI	COG1984	Amino acid transport and metabolism	YP_054571.2	-	kipA	+	460592	461599	1008	CDS	5.1837	-2.47414	7.42879e-07	5.74298e-06	0.576967	0.218129	0.327873	-5.55638	5.74298e-06	1.49171	0.327873	46.3197
S-adenosylmethionine riboswitch	undefined	undefined			mswA	+	1258304	1258424	121	No_CDS	0.298472	-0.796995	0.255215	0.362136	0.574502	0.364684	0.48668	-1.73748	0.362136	1.48916	0.48668	1.03376
glycine betaine ABC transporter (permease)	COG4176	Amino acid transport and metabolism	NP_388181.1	yes	opuAB	+	322271	323119	849	CDS	8.81018	0.166	0.577451	0.679403	0.573694	0.0549098	0.110061	1.12194	0.679403	1.48833	0.110061	340.489
putative hydrolase	COG1506	Amino acid transport and metabolism			ytmA	-	3131446	3132219	774	CDS	4.4866	0.63986	0.029601	0.062856	0.573557	0.053571	0.10794	1.55818	0.062856	1.48819	0.10794	15.8749
ATPase possibly involved in protein degradation	COG0465	Posttranslational modification, protein turnover, chaperones	NP_389124.1	-	yjoB	+	1314453	1315724	1272	CDS	6.97344	-2.49731	2.12811e-08	2.25152e-07	0.572775	0.173775	0.274682	-5.64633	2.25152e-07	1.48738	0.274682	162.193
oligopeptide ABC transporter (permease)	COG1173	Amino acid transport and metabolism|Inorganic ion transport and metabolism	NP_389022.1	yes	appC	+	1216210	1217121	912	CDS	2.12555	0.502793	0.20939	0.308523	0.570059	0.161136	0.259295	1.41695	0.308523	1.48458	0.259295	3.24831
putative UTP-glucose-1-phosphate uridylyltransferase	COG1210	Cell wall/membrane/envelope biogenesis	NP_389700.1	-	yngB	+	1946702	1947595	894	CDS	5.70668	2.04554	4.41511e-12	8.84099e-11	0.569152	0.0533382	0.107594	4.12827	8.84099e-11	1.48365	0.107594	21.1678
conserved hypothetical protein	COG3853	Defense mechanisms	NP_387907.1	-	yaaN	+	36478	37638	1161	CDS	6.20618	-0.488552	0.107848	0.183091	0.569032	0.0604208	0.119127	-1.40304	0.183091	1.48353	0.119127	74.6609
ATP-binding stage III sporulation protein	COG3854	Cell cycle control, cell division, chromosome partitioning	NP_390323.1	-	spoIIIAA	-	2536690	2537613	924	CDS	1.02092	1.5136	0.0545334	0.104048	0.568644	0.49575	0.61687	2.85522	0.104048	1.48313	0.61687	0.687654
transcriptional regulator	COG1940	Transcription|Carbohydrate transport and metabolism	NP_389641.2	yes	xylR	-	1890512	1891666	1155	CDS	7.25766	0.546594	0.054263	0.103749	0.56832	0.0457547	0.0946301	1.46063	0.103749	1.4828	0.0946301	117.941
component of the twin-arginine pre-protein translocation pathway	COG0805	Intracellular trafficking, secretion, and vesicular transport	NP_388146.2	yes	tatCD	+	286048	286776	729	CDS	0.524845	-1.72084	0.0141261	0.0333837	0.568246	0.305548	0.424027	-3.29629	0.0333837	1.48272	0.424027	1.1333
putative amidohydrolase	COG1473	General function prediction only	NP_388888.2	-	yhaA	-	1080150	1081340	1191	CDS	5.884	-0.611495	0.0974793	0.167638	0.567982	0.12225	0.208838	-1.52784	0.167638	1.48245	0.208838	67.1107
putative receptor	COG3476	Signal transduction mechanisms			ytaB	+	3163237	3163704	468	CDS	5.71423	0.235645	0.603142	0.701388	0.567524	0.211848	0.320781	1.17743	0.701388	1.48198	0.320781	39.449
putative stress adaptation protein	COG2310	Signal transduction mechanisms	NP_388173.1	-	yceE	+	313396	313974	579	CDS	9.47536	0.419069	0.200617	0.298381	0.566916	0.0839134	0.154054	1.33706	0.298381	1.48135	0.154054	561.21
putative reductase or disulfide isomerase	undefined	undefined	NP_388279.1	yes	ycnL	+	449198	449551	354	CDS	5.84788	0.0336575	0.90929	0.938143	0.566552	0.0557924	0.111575	1.0236	0.938143	1.48098	0.111575	46.6243
cytochrome P450 of bacillaene metabolism	COG2124	Secondary metabolites biosynthesis, transport and catabolism|Defense mechanisms	NP_389605.2	-	pksS	-	1858566	1859783	1218	CDS	6.71243	1.00539	0.000534716	0.00201933	0.566195	0.0510672	0.103778	2.00748	0.00201933	1.48061	0.103778	59.8445
oligopeptide ABC transporter (permease)	COG1173	Amino acid transport and metabolism|Inorganic ion transport and metabolism	NP_389027.1	yes	oppC	+	1222533	1223450	918	CDS	4.65753	-1.96576	1.75117e-06	1.21223e-05	0.566125	0.146979	0.241309	-3.90619	1.21223e-05	1.48054	0.241309	34.0973
putative ABC transporter (ATP-binding protein)	COG1132	Defense mechanisms	NP_388749.1	yes	ygaD	+	939349	941091	1743	CDS	7.39689	0.718323	0.0183972	0.0421197	0.56528	0.0635097	0.1237	1.64527	0.0421197	1.47967	0.1237	116.696
spore membrane protein involved in germination	COG2244	Cell wall/membrane/envelope biogenesis	NP_389266.1	yes	ykvU	+	1449250	1450587	1338	CDS	2.58566	0.629904	0.0999478	0.171524	0.563194	0.150866	0.246245	1.54746	0.171524	1.47754	0.246245	4.04609
conserved hypothetical protein	undefined	undefined	NP_388747.1	-	ygaB	+	938243	938587	345	CDS	0.241868	-0.232505	0.748894	0.81901	0.562482	0.413711	0.537432	-1.17487	0.81901	1.47681	0.537432	0.629872
acetoin dehydrogenase E3 component (dihydrolipoamide dehydrogenase)	COG1249	Energy production and conversion	NP_388690.1	-	acoL	+	882266	883642	1377	CDS	3.6078	0.45267	0.184229	0.278754	0.561762	0.104515	0.184293	1.36857	0.278754	1.47607	0.184293	8.0844
putative acetyltransferase	COG0456	Translation, ribosomal structure and biogenesis	NP_388625.1	-	yfmK	+	817311	817757	447	CDS	3.71442	-0.095825	0.800803	0.860324	0.561676	0.13752	0.229439	-1.06868	0.860324	1.47598	0.229439	11.0335
putative polysaccharide deacetylase	COG0726	Carbohydrate transport and metabolism|Cell wall/membrane/envelope biogenesis	NP_388847.1	1	yheN	-	1040861	1041709	849	CDS	6.9788	0.674836	0.0256015	0.0558715	0.560676	0.0639167	0.124173	1.59641	0.0558715	1.47496	0.124173	97.058
disulfide bond chaperone (heat shock protein HSP33)	COG1281	Posttranslational modification, protein turnover, chaperones	NP_387952.1	-	hslO	+	79880	80755	876	CDS	7.69611	0.520766	0.0887551	0.155767	0.56044	0.0674166	0.129562	1.43472	0.155767	1.47472	0.129562	152.974
hypothetical protein, phage SPbeta	undefined	undefined	NP_390048.1	-	yokB	-	2283858	2284568	711	CDS	2.14077	-0.567946	0.157834	0.248336	0.559756	0.143352	0.237208	-1.48241	0.248336	1.47402	0.237208	4.38191
phosphate butyryl coenzyme A transferase	COG0280	Energy production and conversion	NP_390289.2	-	ptb	-	2503765	2504664	900	CDS	6.99128	0.348102	0.265709	0.373156	0.559603	0.0744381	0.14088	1.27289	0.373156	1.47386	0.14088	77.9377
tRNA-Gln	undefined	undefined			trnD-Gln	+	952580	952651	72	tRNA	6.74826	-1.66813	1.89451e-06	1.30705e-05	0.557462	0.101408	0.179741	-3.17802	1.30705e-05	1.47168	0.179741	137.386
conserved hypothetical protein, cupin family	COG4297	Function unknown	NP_389109.1	-	yjlB	+	1297726	1298223	498	CDS	5.77702	1.56422	6.34244e-06	3.90341e-05	0.557112	0.105268	0.185461	2.95717	3.90341e-05	1.47132	0.185461	30.2018
tRNA-Ser	undefined	undefined			trnD-Ser	+	951662	951753	92	tRNA	5.70751	-1.86871	2.70087e-07	2.286e-06	0.556739	0.109943	0.191885	-3.65205	2.286e-06	1.47094	0.191885	65.2504
nucleotide phosphohydrolase	COG1694	Defense mechanisms	NP_390131.1	-	ypjD	-	2360155	2360490	336	CDS	5.10805	0.173454	0.679278	0.765003	0.556272	0.185679	0.288826	1.12776	0.765003	1.47046	0.288826	27.048
putative oxidoreductase	COG0673	General function prediction only	NP_391233.1	-	yvaA	+	3444329	3445405	1077	CDS	9.2246	-0.446203	0.153282	0.242102	0.556057	0.0753491	0.142365	-1.36245	0.242102	1.47025	0.142365	602.022
spore germination protein	undefined	undefined	NP_388949.1	-	gerPE	-	1148744	1149145	402	CDS	0.125005	0.198465	0.78453	0.848169	0.555808	0.445314	0.567883	1.14748	0.848169	1.46999	0.567883	0.571797
tRNA-Arg	undefined	undefined			trnJ-Arg	+	95956	96032	77	tRNA	1.05716	-2.73252	0.000274219	0.00110903	0.55539	0.354966	0.477005	-6.64617	0.00110903	1.46957	0.477005	2.40643
3-dehydroquinate dehydratase	COG0710	Amino acid transport and metabolism	NP_390189.1	-	aroC	-	2412706	2413473	768	CDS	5.26276	0.756653	0.027043	0.0583044	0.555242	0.105913	0.186405	1.68957	0.0583044	1.46941	0.186405	26.6321
putative integral inner membrane protein	COG0628	General function prediction only			yueF	-	3262611	3263720	1110	CDS	7.25923	0.181733	0.525766	0.632367	0.554134	0.0536929	0.108044	1.13425	0.632367	1.46829	0.108044	117.73
putative polyglycerol phosphate assembly and export protein (teichoic acid biosynthesis)	undefined	undefined	NP_391458.1	-	tagC	+	3683438	3684766	1329	CDS	3.82581	0.698	0.0316387	0.0663313	0.554005	0.0931069	0.167854	1.62225	0.0663313	1.46816	0.167854	9.8336
peptidyl-prolyl isomerase	COG0652	Posttranslational modification, protein turnover, chaperones	NP_390217.1	-	ppiB	-	2435360	2435791	432	CDS	8.9213	-0.423853	0.157996	0.24834	0.553409	0.065468	0.126767	-1.34151	0.24834	1.46755	0.126767	421.415
transcriptional regulator controlling alsSD and ictEP expression (LysR family)	COG0583	Transcription	NP_391483.1	-	alsR	+	3711498	3712406	909	CDS	4.92404	-0.94397	0.00264363	0.00803266	0.551421	0.0735117	0.139329	-1.92382	0.00803266	1.46553	0.139329	34.5749
glycine decarboxylase (subunit 2) (glycine cleavage system protein P)	COG1003	Amino acid transport and metabolism	NP_390335.1	-	gcvPB	-	2545410	2546876	1467	CDS	5.18183	1.10424	0.00492906	0.0135459	0.551349	0.160305	0.25841	2.14985	0.0135459	1.46546	0.25841	25.967
stage III sporulation protein	undefined	undefined	NP_390319.2	yes	spoIIIAE	-	2534326	2535525	1200	CDS	0.882528	-0.143469	0.829764	0.881745	0.550372	0.402028	0.525414	-1.10456	0.881745	1.46446	0.525414	1.09184
putative PLP-dependent transcriptional regulator	COG1167	Transcription|Amino acid transport and metabolism	NP_388418.1	1	ydfD	+	583589	585037	1449	CDS	3.77658	-0.614094	0.174274	0.266912	0.546834	0.220707	0.331141	-1.5306	0.266912	1.46088	0.331141	14.6389
putative dehydrogenase	COG1064	Carbohydrate transport and metabolism	NP_390579.2	-	adhA	+	2756312	2757361	1050	CDS	4.47763	0.763891	0.0164628	0.0381592	0.546487	0.0901492	0.16346	1.69806	0.0381592	1.46052	0.16346	15.9124
conserved hypothetical protein	undefined	undefined	NP_389796.1	-	yocB	-	2086743	2087525	783	CDS	5.10653	1.5955	2.50454e-05	0.000135635	0.546081	0.148367	0.243036	3.022	0.000135635	1.46011	0.243036	17.2384
putative oxido-reductase	COG0300	General function prediction only	NP_389732.1	-	yoxD	-	2018554	2019270	717	CDS	8.13158	-1.3003	1.03065e-05	5.96729e-05	0.544829	0.0604488	0.119127	-2.4628	5.96729e-05	1.45885	0.119127	325.269
putative sugar-phosphate epimerase/isomerase	COG1082	Carbohydrate transport and metabolism	NP_388708.1	-	yfiH	+	901555	902496	942	CDS	2.71345	-0.547667	0.225391	0.32659	0.54438	0.216447	0.325821	-1.46172	0.32659	1.45839	0.325821	5.44655
long-chain fatty-acid-CoA ligase (degradative)	COG0318	Lipid transport and metabolism|Secondary metabolites biosynthesis, transport and catabolism	NP_388908.2	yes	lcfB	+	1100980	1102521	1542	CDS	5.75201	-0.179989	0.568531	0.67141	0.543864	0.0851727	0.156017	-1.13288	0.67141	1.45787	0.156017	42.8996
signal peptidase II	COG0597	Cell wall/membrane/envelope biogenesis|Intracellular trafficking, secretion, and vesicular transport	NP_389428.1	yes	lspA	+	1616744	1617208	465	CDS	6.41483	-0.0192017	0.967034	0.979606	0.543831	0.242957	0.356393	-1.0134	0.979606	1.45784	0.356393	72.8783
putative spore coat protein	COG5577	Cell wall/membrane/envelope biogenesis	NP_390576.1	-	yraD	+	2754820	2755119	300	CDS	0.318167	1.73432	0.0134648	0.032106	0.543059	0.510309	0.6304	3.32724	0.032106	1.45706	0.6304	0.414475
putative membrane associated potassium channel	undefined	undefined	NP_388503.1	yes	ydjJ	-	674832	675857	1026	CDS	4.7676	0.696898	0.287639	0.397294	0.542476	0.408166	0.531799	1.62102	0.397294	1.45647	0.531799	16.8762
cryptic glutamate dehydrogenase	COG0334	Amino acid transport and metabolism	NP_390177.2	-	gudB	-	2402067	2403350	1284	CDS	9.85903	0.656575	0.0314074	0.0659474	0.541994	0.0753988	0.14237	1.57634	0.0659474	1.45598	0.14237	633.347
protein tyrosine kinase	COG0489	Cell cycle control, cell division, chromosome partitioning	NP_391506.1	-	ptkA	-	3731822	3732535	714	CDS	5.12359	0.201827	0.56213	0.665958	0.541906	0.121027	0.207093	1.15015	0.665958	1.45589	0.207093	25.7742
putative anion transporter	COG0659	Inorganic ion transport and metabolism	NP_391346.1	yes	yvdB	-	3559979	3561571	1593	CDS	4.54654	0.371351	0.223585	0.324432	0.540528	0.0787992	0.1465	1.29356	0.324432	1.4545	0.1465	17.4328
histidinol phosphate phosphatase	COG1387	Amino acid transport and metabolism|General function prediction only	NP_390840.1	-	hisJ	+	3031614	3032420	807	CDS	6.18258	0.434395	0.26643	0.374041	0.539506	0.168592	0.268245	1.35134	0.374041	1.45347	0.268245	57.159
transcriptional regulator (NifA/NtrC family)	COG1221	Transcription|Signal transduction mechanisms	NP_390586.2	-	levR	-	2763025	2765832	2808	CDS	4.83697	1.39409	4.13538e-06	2.65246e-05	0.538258	0.0792818	0.147064	2.62822	2.65246e-05	1.45222	0.147064	15.5052
cell-division protein and general stress protein (class III heat-shock)	COG0465	Posttranslational modification, protein turnover, chaperones	NP_387950.1	yes	ftsH	+	76984	78897	1914	CDS	11.6994	0.196641	0.499963	0.608644	0.537965	0.0656519	0.127024	1.14603	0.608644	1.45192	0.127024	2591.75
tRNA-Lys	undefined	undefined			trnB-Lys	-	3173501	3173576	76	tRNA	1.03524	-1.2535	0.0615941	0.114981	0.537335	0.373779	0.495756	-2.3842	0.114981	1.45129	0.495756	1.8092
putative exported protein	undefined	undefined	YP_003097742.1	yes	yoyD	+	2130177	2130377	201	CDS	2.2091	-3.48219	8.17158e-09	9.31787e-08	0.536934	0.265522	0.381641	-11.1749	9.31787e-08	1.45089	0.381641	6.88215
D-lactyl ether N-acetylmuramic-6-phosphate acid etherase	COG2103	Cell wall/membrane/envelope biogenesis	NP_388051.1	-	murQ	-	192051	192965	915	CDS	4.99402	-0.837544	0.028502	0.0607797	0.535236	0.157009	0.254449	-1.78701	0.0607797	1.44918	0.254449	35.3274
putative membrane protein with diguanylate cyclase domain	COG3706	Signal transduction mechanisms|Transcription	NP_388309.1	yes	ydaK	+	480013	480864	852	CDS	3.01368	-0.897272	0.0922473	0.160184	0.533092	0.305858	0.424314	-1.86254	0.160184	1.44703	0.424314	8.32331
putative membrane protease	COG0501	Posttranslational modification, protein turnover, chaperones	NP_391757.1	yes	yxkI	+	3981227	3982915	1689	CDS	6.34205	-1.62652	4.2342e-07	3.46243e-06	0.532594	0.0874573	0.159349	-3.08767	3.46243e-06	1.44653	0.159349	95.8042
enoyl-acyl carrier protein reductase III	COG1028	Lipid transport and metabolism|Secondary metabolites biosynthesis, transport and catabolism|General function prediction only	NP_388745.1	-	fabL	+	937079	937831	753	CDS	8.16272	0.0371172	0.909347	0.938143	0.532283	0.103456	0.182896	1.02606	0.938143	1.44622	0.182896	201.789
glycerol-3-phosphate cytidylyltransferase	COG0615	Cell wall/membrane/envelope biogenesis	NP_391455.1	-	tagD	-	3680581	3680970	390	CDS	8.74058	2.04428	1.46074e-09	1.9036e-08	0.532152	0.103756	0.18327	4.12469	1.9036e-08	1.44609	0.18327	184.775
putative triphosphate pyrophosphate hydrolase	COG1051	Nucleotide transport and metabolism	NP_391358.1	-	yvcI	-	3572413	3572889	477	CDS	6.79812	0.289037	0.321322	0.432757	0.531763	0.0689135	0.132068	1.22182	0.432757	1.44569	0.132068	95.4133
ferrichrome ABC transporter (ferrichrome-binding lipoprotein)	COG0614	Inorganic ion transport and metabolism	NP_391213.1	1	fhuD	+	3418474	3419421	948	CDS	9.18857	-0.645702	0.0613218	0.114578	0.531587	0.122773	0.209556	-1.5645	0.114578	1.44552	0.209556	540.983
tRNA-Ala	undefined	undefined			trnJ-Ala	+	96146	96221	76	tRNA	5.48704	-0.670926	0.048755	0.094641	0.531342	0.115987	0.200644	-1.59209	0.094641	1.44527	0.200644	46.4414
putative inhibitor of the autophosphorylation reaction of KinA	COG2049	Amino acid transport and metabolism	NP_388290.2	-	kipI	+	459867	460589	723	CDS	4.52366	-2.49399	7.35869e-08	7.14123e-07	0.529575	0.216968	0.326366	-5.63334	7.14123e-07	1.4435	0.326366	29.85
DNA nuclease, lipoprotein	COG1525	Replication, recombination and repair	NP_389644.1	yes	yncB	-	1895378	1896013	636	CDS	2.80178	0.266161	0.570675	0.67336	0.52932	0.261557	0.376999	1.2026	0.67336	1.44325	0.376999	5.80014
phosphotransferase system (PTS) mannitol-specific enzyme IIA component	COG4668	Carbohydrate transport and metabolism	YP_003097678.1	-	mtlF	+	451185	451616	432	CDS	7.95707	-2.61656	0.000120261	0.000541306	0.528275	0.410498	0.534272	-6.13288	0.000541306	1.4422	0.534272	309.258
site-specific tyrosine recombinase for chromosome partitioning	COG4974	Replication, recombination and repair	NP_390232.2	-	ripX	-	2448591	2449481	891	CDS	6.53371	-0.129498	0.640635	0.732129	0.527671	0.0574667	0.114209	-1.09391	0.732129	1.4416	0.114209	77.8463
putative metal-dependent hydrolase	COG1234	Translation, ribosomal structure and biogenesis	NP_388905.1	-	yhfI	+	1098412	1099146	735	CDS	7.08975	0.403211	0.181915	0.276169	0.523867	0.0836962	0.153793	1.32245	0.276169	1.4378	0.153793	104.104
tRNA uridine 5-carboxymethylaminomethyl modification enzyme	COG0445	Translation, ribosomal structure and biogenesis	NP_391981.1	-	trmF	-	4209603	4211489	1887	CDS	9.00935	0.253061	0.382044	0.497871	0.521977	0.0720167	0.137119	1.19173	0.497871	1.43592	0.137119	451.597
putative integral inner membrane protein	COG4347	Function unknown	NP_390134.1	yes	ypjA	-	2362407	2362964	558	CDS	4.30179	-0.503121	0.142917	0.230249	0.520733	0.125061	0.21249	-1.41728	0.230249	1.43468	0.21249	21.1063
conserved hypothetical protein	undefined	undefined	NP_391811.1	-	yxiB	-	4038794	4039159	366	CDS	3.8222	0.91374	0.0613108	0.114578	0.51919	0.291166	0.408617	1.88392	0.114578	1.43315	0.408617	9.29782
conserved hypothetical protein	undefined	undefined	NP_389359.1	yes	ylaF	-	1545820	1546008	189	CDS	4.51928	-0.206913	0.536431	0.641809	0.518121	0.120568	0.206803	-1.15422	0.641809	1.43209	0.206803	21.7718
metal-dependent carboxypeptidase	COG2317	Amino acid transport and metabolism	NP_390090.1	-	ypwA	-	2320355	2321860	1506	CDS	8.29551	0.418815	0.158621	0.249096	0.517944	0.0817535	0.150763	1.33683	0.249096	1.43191	0.150763	232.037
conserved hypothetical protein	COG4479	Function unknown	NP_389849.1	-	yozE	-	2138868	2139092	225	CDS	3.5972	0.385866	0.272607	0.381019	0.514496	0.147378	0.2418	1.30664	0.381019	1.42849	0.2418	10.7306
phosphosulfolactate synthase	COG1809	Coenzyme transport and metabolism	NP_388976.1	-	slpS	+	1173333	1174091	759	CDS	0.869121	-0.499536	0.402092	0.517912	0.514203	0.357456	0.479215	-1.41376	0.517912	1.4282	0.479215	1.4525
putative transcriptional regulator	COG2378	Transcription	NP_389791.1	-	yobV	-	2083067	2084008	942	CDS	2.74015	0.867793	0.0283484	0.0605464	0.511984	0.212582	0.321299	1.82487	0.0605464	1.42601	0.321299	4.03124
T-box riboswitch specific of tryptophane tRNA ligase	undefined	undefined			tboW	+	276815	277062	248	No_CDS	6.58395	-0.315499	0.325932	0.437668	0.511786	0.111034	0.193707	-1.24444	0.437668	1.42581	0.193707	95.3345
putative ABC transporter (permease)	COG0842	Defense mechanisms	NP_388714.1	yes	yfiN	+	907968	909125	1158	CDS	2.28328	-0.716807	0.093853	0.162354	0.511748	0.210925	0.319737	-1.64354	0.162354	1.42578	0.319737	4.47086
bacilysin biosynthesis protein, dehydratase	COG0077	Amino acid transport and metabolism	NP_391654.1	-	bacA	-	3873566	3874180	615	CDS	0.215955	-0.574206	0.405391	0.52118	0.509159	0.423197	0.546325	-1.48886	0.52118	1.42322	0.546325	0.897319
putative exoribonuclease (3'-5')	COG5018	General function prediction only			kapD	-	3231812	3232429	618	CDS	2.01724	-1.43899	0.0020984	0.00660576	0.50741	0.232605	0.344958	-2.71131	0.00660576	1.4215	0.344958	4.91563
2,5-dioxovalerate dehydrogenase (alpha-ketoglutaric semialdehyde dehydrogenase)	COG1012	Energy production and conversion	NP_388129.1	-	ycbD	+	268846	270312	1467	CDS	2.58833	-0.0434891	0.903186	0.933899	0.506858	0.152619	0.248711	-1.0306	0.933899	1.42095	0.248711	4.5704
putative metal-dependent hydrolase, integral inner membrane protein	COG1994	Posttranslational modification, protein turnover, chaperones	NP_391633.1	yes	ywhC	-	3852718	3853377	660	CDS	6.62432	-0.274763	0.33128	0.443833	0.506708	0.0732319	0.138982	-1.2098	0.443833	1.4208	0.138982	95.583
putative membrane hydrolase	COG1988	General function prediction only	NP_388742.1	yes	yfhP	-	934457	935440	984	CDS	7.76786	1.99618	1.01031e-09	1.35534e-08	0.506268	0.111412	0.19415	3.98942	1.35534e-08	1.42037	0.19415	82.809
ATP-dependent RNA helicase, cold shock	COG0513	Replication, recombination and repair	NP_390393.1	-	cshB	-	2594184	2595500	1317	CDS	8.68474	2.35577	1.53559e-13	3.86724e-12	0.506037	0.097813	0.175118	5.11868	3.86724e-12	1.42014	0.175118	165.034
type-2 restriction enzyme BsuMI component BsuRA (YdiR)	undefined	undefined	NP_388490.1	-	bsuRA	+	659623	660564	942	CDS	6.03908	-1.02309	0.00104122	0.00361606	0.505781	0.0999837	0.177985	-2.03227	0.00361606	1.41989	0.177985	71.6149
putative lyase	COG0346	Secondary metabolites biosynthesis, transport and catabolism	NP_390571.1	-	yraH	-	2752167	2752553	387	CDS	2.24673	0.331284	0.43752	0.551603	0.505608	0.243007	0.356393	1.25813	0.551603	1.41972	0.356393	3.76027
transcriptional regulator	COG0664	Signal transduction mechanisms	NP_391610.1	1	arfM	-	3830141	3830617	477	CDS	0.266914	-1.90185	0.0136545	0.0324562	0.50558	0.408209	0.531799	-3.73693	0.0324562	1.41969	0.531799	1.10669
putative membrane protein	undefined	undefined	YP_054575.1	yes	ygzB	-	944959	945312	354	CDS	7.48548	1.9999	5.83394e-10	8.34436e-09	0.504984	0.109087	0.190797	3.99973	8.34436e-09	1.41911	0.190797	61.1943
putative AdoMet radical enzyme	COG0535	General function prediction only	NP_391897.1	-	yydG	-	4126481	4127440	960	CDS	1.6421	-3.9529	7.32659e-13	1.66164e-11	0.504875	0.151842	0.247542	-15.486	1.66164e-11	1.419	0.247542	4.48718
antitoxin inhibiting Rnase RttL	undefined	undefined	NP_389780.1	-	rttM	-	2071286	2071744	459	CDS	3.7884	1.51587	8.10246e-06	4.86978e-05	0.503142	0.153252	0.249366	2.85972	4.86978e-05	1.4173	0.249366	6.7898
putative flagellar motor component	COG1291	Cell motility			ytxD	-	3043284	3044102	819	CDS	6.14455	-0.693351	0.0421144	0.0837595	0.502674	0.137965	0.230036	-1.61704	0.0837595	1.41684	0.230036	64.9433
putative phage-related replication protein	COG4195	Mobilome: prophages, transposons	NP_389609.1	1	ymaC	+	1863448	1864155	708	CDS	2.68524	0.0364848	0.918075	0.944062	0.502202	0.156546	0.2541	1.02561	0.944062	1.41637	0.2541	5.18395
tRNA-Ala	undefined	undefined			trnB-Ala	-	3172968	3173040	73	tRNA	1.02763	-1.04954	0.0796317	0.142249	0.501908	0.352709	0.474401	-2.06987	0.142249	1.41609	0.474401	1.75288
spore membrane component	undefined	undefined	NP_390173.1	1	ypeB	-	2397765	2399117	1353	CDS	2.70871	2.69753	6.76723e-05	0.000323525	0.500915	0.466558	0.588863	6.48692	0.000323525	1.41511	0.588863	1.78949
two-component response regulator [YvqE] responding to cell wall stress	COG2197	Signal transduction mechanisms|Transcription			liaR	-	3394422	3395057	636	CDS	5.54168	-0.65551	0.0366343	0.0748208	0.500365	0.107831	0.189003	-1.57517	0.0748208	1.41457	0.189003	46.6864
thioredoxin reductase	COG0492	Posttranslational modification, protein turnover, chaperones	NP_391359.1	1	trxB	-	3573207	3574157	951	CDS	8.06682	0.984699	0.00122296	0.00416273	0.500042	0.0988789	0.176554	1.9789	0.00416273	1.41425	0.176554	173.539
L-Ala-D/L-Glu epimerase	COG4948	Cell wall/membrane/envelope biogenesis|General function prediction only	NP_389181.1	-	ykfB	+	1366844	1367944	1101	CDS	2.6814	-0.95185	0.0096227	0.0238606	0.499163	0.14785	0.242382	-1.93435	0.0238606	1.41339	0.242382	6.80068
putative phosphotransferase system enzyme IIC permease component	COG1455	Carbohydrate transport and metabolism	NP_391718.1	yes	ywbA	-	3938307	3939641	1335	CDS	3.73874	0.0450308	0.891626	0.927084	0.498818	0.13172	0.221512	1.03171	0.927084	1.41306	0.221512	10.2294
tRNA N(6)-threonylcarbamoyladenosine (t(6)A) methylthiotransferase	COG0621	Translation, ribosomal structure and biogenesis	NP_390421.1	-	mtaB	-	2621677	2623032	1356	CDS	8.71885	-0.377926	0.243817	0.348689	0.498085	0.124776	0.212093	-1.29947	0.348689	1.41234	0.212093	452.41
putative transcriptional regulator	COG1378	Transcription	NP_390589.1	-	yrhO	+	2768827	2769654	828	CDS	4.64711	0.89327	0.00367624	0.0106349	0.497408	0.109198	0.19091	1.85738	0.0106349	1.41167	0.19091	18.2687
putative acetyltransferase	COG0456	Translation, ribosomal structure and biogenesis	NP_390205.1	-	ypzK	-	2427405	2427779	375	CDS	8.05827	2.22035	1.23477e-13	3.20805e-12	0.496735	0.0860029	0.157047	4.66006	3.20805e-12	1.41102	0.157047	100.67
putative epimerase	COG0702	General function prediction only	NP_388907.1	-	yhfK	+	1100219	1100863	645	CDS	7.28846	0.657056	0.0174903	0.0402002	0.496622	0.0727793	0.138314	1.57686	0.0402002	1.41091	0.138314	107.701
1,4-dihydroxy-2-naphthoate octaprenyltransferase	COG1575	Coenzyme transport and metabolism	NP_391728.1	yes	menA	-	3950726	3951661	936	CDS	9.16045	0.0924073	0.756598	0.824047	0.495319	0.0974581	0.174701	1.06615	0.824047	1.40963	0.174701	455.586
putative efflux transporter	COG1280	Amino acid transport and metabolism	NP_390588.1	yes	yrhP	-	2768042	2768674	633	CDS	5.22821	0.368047	0.246858	0.352103	0.494166	0.122232	0.208838	1.2906	0.352103	1.40851	0.208838	27.2336
putative integral inner membrane protein	undefined	undefined	NP_391678.1	yes	ywdE	-	3899272	3899805	534	CDS	3.20799	0.300451	0.386662	0.502135	0.493983	0.158885	0.257055	1.23153	0.502135	1.40833	0.257055	6.08788
methyltransferase of m5U747 and m5U1939 in 23S RNA	COG2265	Translation, ribosomal structure and biogenesis	NP_388555.1	-	rlmCD	+	737603	738982	1380	CDS	7.69999	-0.144786	0.704052	0.787502	0.493963	0.19588	0.301496	-1.10557	0.787502	1.40831	0.301496	198.451
putative murein hydrolase export regulator	COG1346	Cell wall/membrane/envelope biogenesis	NP_391882.3	yes	yxaC	+	4110217	4110909	693	CDS	3.68377	-0.9469	0.00644604	0.0169839	0.492099	0.141889	0.235335	-1.92773	0.0169839	1.40649	0.235335	12.6139
phosphatidylserine synthase	COG1183	Lipid transport and metabolism	NP_388109.1	yes	pssA	+	247744	248277	534	CDS	7.18879	0.0118186	0.966348	0.979606	0.49164	0.079943	0.148023	1.00823	0.979606	1.40604	0.148023	129.29
RNA polymerase sporulation-specific sigma-K factor precursor (Sigma-27) (N-terminal half)	undefined	undefined		1	spoIVCB	+	2652993	2653463	471	CDS	1.26239	-1.3326	0.0211344	0.0474081	0.489914	0.340533	0.461807	-2.51857	0.0474081	1.40436	0.461807	2.3979
putative sporulation-specific glycosylase	COG3858	Cell cycle control, cell division, chromosome partitioning	NP_389262.1	-	ykvQ	+	1445638	1446336	699	CDS	2.11119	0.902206	0.0438306	0.0866688	0.488573	0.293473	0.410743	1.86892	0.0866688	1.40306	0.410743	2.56212
efflux transporter	COG2814	Carbohydrate transport and metabolism	NP_390536.1	yes	blt	+	2716973	2718175	1203	CDS	3.31229	1.42328	3.94811e-05	0.000203095	0.48837	0.17969	0.282184	2.68195	0.000203095	1.40286	0.282184	5.51433
conserved hypothetical protein	undefined	undefined	NP_388605.1	-	yetN	-	791462	792532	1071	CDS	6.8264	1.59276	4.55265e-08	4.53607e-07	0.488203	0.0902969	0.163651	3.01625	4.53607e-07	1.4027	0.163651	53.2936
hypothetical protein, phage SPbeta	undefined	undefined	NP_390016.1	yes	yomK	+	2247889	2248335	447	CDS	0.496664	-0.218024	0.803836	0.860429	0.487582	0.566981	0.681739	-1.16314	0.860429	1.40209	0.681739	0.629578
fructoselysine-6-P-deglycase	COG2222	Cell wall/membrane/envelope biogenesis			frlB	-	3351110	3352096	987	CDS	3.40748	1.72879	9.50641e-05	0.000437977	0.487349	0.279802	0.396876	3.3145	0.000437977	1.40187	0.396876	5.91968
pre-queuosine 0 synthase	COG0603	Translation, ribosomal structure and biogenesis	NP_389255.1	-	queC	+	1439448	1440107	660	CDS	5.99446	-0.028361	0.92148	0.946852	0.485793	0.0917664	0.165729	-1.01985	0.946852	1.40036	0.165729	62.6635
putative efflux transporter	COG2814	Carbohydrate transport and metabolism	NP_391743.1	yes	yxlH	+	3966745	3967947	1203	CDS	5.01136	-1.82192	5.26134e-07	4.20999e-06	0.48502	0.161123	0.259295	-3.53552	4.20999e-06	1.3996	0.259295	40.4892
conserved hypothetical protein	COG1246	Amino acid transport and metabolism	NP_391577.1	-	ywlB	-	3794166	3794609	444	CDS	4.03	0.899674	0.0166989	0.0385974	0.484339	0.202452	0.309867	1.86564	0.0385974	1.39894	0.309867	11.5027
small acid-soluble spore protein (thioredoxin-like protein)	undefined	undefined	NP_389685.1	-	tlp	+	1930447	1930698	252	CDS	0.682798	1.4326	0.0160502	0.0374141	0.484108	0.473483	0.596078	2.69932	0.0374141	1.39872	0.596078	0.69824
conserved hypothetical protein	undefined	undefined	NP_389351.1	-	ykzC	+	1538264	1538692	429	CDS	5.71365	0.134807	0.619007	0.714975	0.482704	0.0757532	0.142776	1.09795	0.714975	1.39736	0.142776	46.5432
putative protein kinase	COG0515	Signal transduction mechanisms	NP_388085.1	-	ybdM	-	223219	223989	771	CDS	3.51506	-0.376974	0.241865	0.346426	0.482573	0.127734	0.216195	-1.29861	0.346426	1.39723	0.216195	10.501
xanthine dehydrogenase molybdopterin recruitment factor	COG1975	Posttranslational modification, protein turnover, chaperones			pucA	-	3339945	3340937	993	CDS	0.695251	-0.732518	0.203499	0.301684	0.480368	0.35898	0.480631	-1.66154	0.301684	1.3951	0.480631	1.39045
conserved hypothetical protein	COG0457	General function prediction only	NP_390140.1	-	ypiA	-	2366347	2367618	1272	CDS	7.49561	1.94928	3.06252e-11	5.28221e-10	0.476558	0.0958846	0.172407	3.86183	5.28221e-10	1.39142	0.172407	87.8591
putative spore germination protein	undefined	undefined			yueG	-	3262330	3262551	222	CDS	5.95097	0.628468	0.0211896	0.047506	0.475573	0.0827469	0.15239	1.54592	0.047506	1.39047	0.15239	42.9594
iron(III)-siderophore transporter (ATP binding component)	COG1120	Inorganic ion transport and metabolism|Coenzyme transport and metabolism			yusV	-	3379112	3379939	828	CDS	9.32873	-0.059077	0.856239	0.90307	0.475529	0.145649	0.239924	-1.0418	0.90307	1.39043	0.239924	559.488
putative oxidoreductase	COG2055	Energy production and conversion	NP_389114.1	1	yjmC	+	1303423	1304436	1014	CDS	0.60227	0.139155	0.816855	0.871638	0.475332	0.429346	0.55267	1.10126	0.871638	1.39024	0.55267	0.886733
putative beta-hydroxyacid dehydrogenase	COG2084	Lipid transport and metabolism	NP_389279.1	-	ykwC	+	1465733	1466599	867	CDS	7.29026	-0.427192	0.236087	0.339215	0.475121	0.187448	0.290916	-1.34461	0.339215	1.39003	0.290916	157.447
putative glycosyltransferase	COG0438	Cell wall/membrane/envelope biogenesis	NP_390370.2	-	yqgM	-	2574641	2575720	1080	CDS	2.88308	0.239088	0.500127	0.608663	0.474807	0.18512	0.288175	1.18025	0.608663	1.38973	0.288175	5.66504
putative membrane bound hydrolase	COG1030	Posttranslational modification, protein turnover, chaperones	NP_390417.1	yes	yqeZ	-	2618466	2619779	1314	CDS	8.98616	-2.30219	1.47518e-08	1.61483e-07	0.472962	0.222661	0.333585	-4.93206	1.61483e-07	1.38796	0.333585	649.718
putative carbohydrate transporter	COG2814	Carbohydrate transport and metabolism	NP_391464.2	yes	ywtG	-	3692533	3693906	1374	CDS	8.1092	-0.158216	0.797263	0.85835	0.472956	0.443401	0.566764	-1.11591	0.85835	1.38795	0.566764	249.373
iron(III) siderophore transport permease	COG0609	Inorganic ion transport and metabolism	NP_388727.1	yes	yfhA	+	921472	922503	1032	CDS	8.3109	-0.536193	0.0994536	0.170807	0.471423	0.146891	0.241291	-1.45014	0.170807	1.38648	0.241291	248.183
putative lipoprotein	undefined	undefined	YP_003097790.1	-	yvzJ	+	3568282	3568491	210	CDS	1.63911	-0.259639	0.657854	0.747023	0.470937	0.416326	0.540144	-1.19718	0.747023	1.38601	0.540144	2.84266
tRNA-Arg	undefined	undefined			trnE-Arg	+	635110	635186	77	tRNA	3.57365	-1.63324	3.54733e-05	0.000183861	0.470629	0.205329	0.313104	-3.10208	0.000183861	1.38571	0.313104	15.5854
redundant pyrroline-5-carboxylate reductase	COG0345	Amino acid transport and metabolism	NP_389174.1	-	proG	+	1359454	1360272	819	CDS	4.59624	-0.53407	0.116863	0.195167	0.469904	0.164469	0.263317	-1.44801	0.195167	1.38502	0.263317	25.0494
regulator of competence and sporulation	COG4862	Transcription|Signal transduction mechanisms|Cell motility	NP_390178.1	-	mecB	-	2403506	2404090	585	CDS	7.94711	2.28861	1.81775e-12	3.9273e-11	0.469686	0.132919	0.22298	4.88585	3.9273e-11	1.38481	0.22298	101.09
ABC transporter (ATP-binding protein)	COG1131	Defense mechanisms	NP_388885.1	-	ecsA	+	1077440	1078183	744	CDS	5.88022	0.0453773	0.874867	0.9155	0.469098	0.104162	0.183907	1.03195	0.9155	1.38424	0.183907	52.4748
conserved hypothetical protein, N-terminal part of YmzE	undefined	undefined			ymzE	+	1862937	1862993	57	CDS	1.50738	0.540935	0.247093	0.352315	0.468394	0.333795	0.454924	1.45492	0.352315	1.38357	0.454924	1.86874
putative transcriptional regulator, phage SPbeta	COG3655	Transcription	NP_389960.1	-	yopS	+	2203779	2204003	225	CDS	4.65889	0.159802	0.6038	0.701557	0.468383	0.129678	0.218705	1.11713	0.701557	1.38356	0.218705	23.603
putative N-acetyltransferase	COG2153	General function prediction only	NP_388981.1	-	yitI	-	1178218	1178667	450	CDS	4.41024	-0.699448	0.0251334	0.0549961	0.467231	0.128285	0.216712	-1.62388	0.0549961	1.38245	0.216712	21.9813
transcriptional activator of proline degradation operon	COG2508	Transcription	NP_388205.2	yes	putR	+	348724	349959	1236	CDS	4.82351	-0.623543	0.0564178	0.107121	0.4671	0.148245	0.242932	-1.54065	0.107121	1.38233	0.242932	28.2036
teichoic acid precursors permease	COG1682	Carbohydrate transport and metabolism|Cell wall/membrane/envelope biogenesis	NP_391452.1	yes	tagG	-	3675167	3675994	828	CDS	8.90645	2.84022	3.3499e-17	1.43243e-15	0.466676	0.140453	0.233615	7.16132	1.43243e-15	1.38192	0.233615	147.528
permease of ABC guanosine transporter	COG1079	General function prediction only			nupQ	+	3243657	3244616	960	CDS	1.72422	-0.229909	0.565792	0.66933	0.464736	0.232741	0.345035	-1.17276	0.66933	1.38006	0.345035	3.12246
Spo0A-P phosphatase	undefined	undefined	NP_389675.1	-	ynzD	-	1922841	1923014	174	CDS	2.89965	1.87356	2.9997e-05	0.000158479	0.46454	0.318007	0.437619	3.66435	0.000158479	1.37988	0.437619	3.87392
conserved hypothetical protein	undefined	undefined			ytzC	-	3119565	3119837	273	CDS	3.59156	-0.0558071	0.866524	0.909274	0.46404	0.162336	0.260818	-1.03944	0.909274	1.3794	0.260818	10.0324
extracellular glutamyl-endopeptidase	COG3591	Amino acid transport and metabolism	NP_388106.1	1	mpr	+	245190	246131	942	CDS	5.46627	0.505218	0.148888	0.237078	0.463802	0.18719	0.290736	1.41934	0.237078	1.37917	0.290736	33.3048
spore germination receptor subunit	undefined	undefined	NP_388252.1	yes	gerKA	+	420110	421744	1635	CDS	2.9799	-1.28244	0.000660636	0.00243439	0.462246	0.188603	0.292206	-2.4325	0.00243439	1.37768	0.292206	9.06465
histidine permease	COG0833	Amino acid transport and metabolism	NP_391818.2	yes	hutM	+	4047538	4048965	1428	CDS	2.68746	-0.357597	0.310601	0.421494	0.461423	0.180257	0.282641	-1.28129	0.421494	1.3769	0.282641	6.1511
putative two-component sensor histidine kinase	COG0745	Signal transduction mechanisms|Transcription	NP_391516.1	-	ywpD	+	3742384	3743220	837	CDS	3.37839	1.65176	5.17767e-06	3.23506e-05	0.461076	0.223964	0.334858	3.14217	3.23506e-05	1.37657	0.334858	5.21056
CDP-diacylglycerol-glycerol-3-phosphate 3-phosphatidyltransferase	COG0558	Lipid transport and metabolism	NP_389574.2	yes	pgsA	+	1762623	1763204	582	CDS	6.00954	0.600667	0.0376329	0.0764768	0.459581	0.112869	0.196151	1.51642	0.0764768	1.37514	0.196151	48.5278
putative stress-related ATPase	COG3832	Function unknown	NP_389656.1	-	yndB	-	1906272	1906706	435	CDS	7.20239	0.434284	0.151479	0.239715	0.458751	0.130518	0.219761	1.35124	0.239715	1.37435	0.219761	106.504
tRNA-Thr	undefined	undefined			trnI-Thr	+	165830	165902	73	tRNA	3.74141	-3.07398	8.01875e-14	2.16559e-12	0.458669	0.190904	0.294966	-8.42091	2.16559e-12	1.37427	0.294966	19.0009
K+/H+ antiporter for K+ efflux	COG0490	Inorganic ion transport and metabolism	NP_388867.1	-	khtT	-	1060427	1060924	498	CDS	5.69572	1.72702	5.82905e-08	5.7108e-07	0.457827	0.148954	0.243802	3.31043	5.7108e-07	1.37347	0.243802	23.0784
putative transcriptional regulator	COG1846	Transcription	NP_388932.1	-	yhjH	+	1124438	1124965	528	CDS	4.6623	-0.666389	0.0227879	0.0506083	0.45652	0.113147	0.196475	-1.5871	0.0506083	1.37223	0.196475	27.389
putative transcriptional regulator, PadR family	COG1695	Transcription	YP_003097793.1	-	ywzG	-	3900481	3900819	339	CDS	3.79233	0.290108	0.451778	0.564722	0.456517	0.238561	0.35201	1.22273	0.564722	1.37223	0.35201	11.9595
hypothetical protein	undefined	undefined	NP_389102.1	1	yjiA	-	1290675	1290953	279	CDS	2.70541	1.53077	0.000126999	0.000567812	0.456257	0.282086	0.398701	2.88941	0.000567812	1.37198	0.398701	3.52576
acetyl-CoA carboxylase subunit (biotin carboxyl carrier subunit)	COG0511	Coenzyme transport and metabolism|Lipid transport and metabolism	NP_390315.1	-	accB	-	2531718	2532197	480	CDS	7.7026	0.348185	0.217944	0.318045	0.455853	0.107418	0.188434	1.27296	0.318045	1.37159	0.188434	160.141
putative site-specific recombinase / invertase	undefined	undefined	NP_388556.1	-	yefB	-	738995	739897	903	CDS	0.576669	0.308008	0.654252	0.744169	0.455325	0.510803	0.63075	1.238	0.744169	1.37109	0.63075	1.06523
two-component sensor histidine kinase [YufM]	COG3290	Signal transduction mechanisms			yufL	+	3237157	3238758	1602	CDS	6.08306	0.864428	0.00899441	0.0224723	0.455149	0.169159	0.268938	1.82062	0.0224723	1.37092	0.268938	49.303
diacylglycerol kinase	COG1597	Lipid transport and metabolism|General function prediction only	NP_388554.1	-	dagK	+	736436	737347	912	CDS	8.32331	0.553393	0.0582127	0.109938	0.454804	0.119545	0.205391	1.46753	0.109938	1.3706	0.205391	241.679
putative membrane protein	undefined	undefined	YP_003097680.1	yes	ydzK	-	490777	491043	267	CDS	5.63506	-0.28344	0.491598	0.601135	0.453922	0.270344	0.387487	-1.21709	0.601135	1.36976	0.387487	42.8443
putative ABC transporter (binding lipoprotein)	COG0834	Amino acid transport and metabolism|Signal transduction mechanisms	NP_388220.1	1	yckB	-	367995	368858	864	CDS	8.10279	-1.26357	1.77877e-05	9.90751e-05	0.453141	0.117993	0.203598	-2.40089	9.90751e-05	1.36902	0.203598	300.04
putative acetyltransferase	COG0456	Translation, ribosomal structure and biogenesis	NP_390250.1	-	yqjY	-	2463571	2464041	471	CDS	3.64927	-0.0646885	0.847178	0.8956	0.451487	0.177768	0.279981	-1.04586	0.8956	1.36745	0.279981	12.3413
putative isomerase	COG0384	General function prediction only	NP_388728.1	-	yfhB	+	922618	923499	882	CDS	4.45328	-0.90539	0.00277291	0.00837587	0.451117	0.126196	0.213984	-1.87305	0.00837587	1.3671	0.213984	23.0196
conserved hypothetical protein	undefined	undefined			yuzH	-	3213342	3213596	255	CDS	3.71825	0.148487	0.80237	0.860429	0.450606	0.449022	0.5719	1.10841	0.860429	1.36661	0.5719	10.7061
putative 2-hydroxyacid dehydrogenase	COG0111	Coenzyme transport and metabolism|General function prediction only	NP_389738.1	-	yoaD	-	2024042	2025076	1035	CDS	2.51218	-1.5998	0.000985084	0.00345326	0.44985	0.321066	0.440785	-3.03101	0.00345326	1.3659	0.440785	7.25206
putative transcriptional regulator (AraC/XylS family)	COG2207	Transcription	NP_388398.1	-	ydeE	-	563614	564486	873	CDS	3.29732	0.235794	0.54392	0.648691	0.449747	0.249571	0.364069	1.17755	0.648691	1.3658	0.364069	7.91105
putative lipoprotein	undefined	undefined	NP_390362.2	-	yqgU	-	2566237	2567298	1062	CDS	6.7564	-0.236401	0.407013	0.522939	0.449682	0.114771	0.198958	-1.17805	0.522939	1.36574	0.198958	90.3401
protein octanoyltransferase	COG0095	Coenzyme transport and metabolism	NP_390333.1	-	lipM	-	2543968	2544804	837	CDS	6.10383	0.237624	0.425792	0.541474	0.448716	0.133555	0.223881	1.17905	0.541474	1.36482	0.223881	62.174
putative hydroxyacid dehydrogenase	COG1023	Carbohydrate transport and metabolism	NP_390450.1	-	yqeC	-	2650487	2651380	894	CDS	2.64113	0.638784	0.0882094	0.155075	0.448372	0.248097	0.362562	1.55702	0.155075	1.3645	0.362562	4.60789
conserved hypothetical protein	COG4399	Function unknown	NP_388860.1	yes	yheB	+	1053520	1054653	1134	CDS	6.12737	0.325292	0.256493	0.363619	0.44794	0.119441	0.205391	1.25292	0.363619	1.36409	0.205391	54.5057
putative integral inner membrane protein	undefined	undefined	NP_391679.2	yes	ywdD	-	3899853	3900488	636	CDS	4.17999	-0.268003	0.519368	0.626456	0.445745	0.281677	0.398307	-1.20414	0.626456	1.36202	0.398307	17.4257
putative integral inner membrane protein	undefined	undefined	NP_391542.1	yes	ywnC	+	3765051	3765434	384	CDS	7.07902	-2.05852	2.97684e-10	4.42752e-09	0.445471	0.154527	0.251122	-4.1656	4.42752e-09	1.36176	0.251122	180.33
DNA repair and recombination protein	COG0353	Replication, recombination and repair	NP_387902.1	-	recR	+	28867	29463	597	CDS	7.07406	0.36032	0.263216	0.370194	0.445462	0.167425	0.266905	1.28371	0.370194	1.36175	0.266905	108.812
putative integrase/transposase	undefined	undefined	NP_391904.1	1	yycS	+	4135351	4135764	414	CDS	3.09318	-0.0157809	0.960473	0.97529	0.444447	0.161051	0.259295	-1.011	0.97529	1.36079	0.259295	7.64993
putative fructose 1,6-bisphosphatase class II	COG1494	Carbohydrate transport and metabolism	NP_391590.1	-	ywjI	-	3805090	3806055	966	CDS	9.35326	-0.400554	0.200999	0.298734	0.443565	0.15684	0.254282	-1.32001	0.298734	1.35996	0.254282	583.819
putative integral membrane protein	undefined	undefined	NP_391549.2	yes	ywmF	-	3770365	3770844	480	CDS	1.49343	0.709808	0.291608	0.40237	0.443288	0.519397	0.63836	1.63559	0.40237	1.3597	0.63836	1.46941
phosphodiesterase acting on cyclic dinucleotides	COG3887	Signal transduction mechanisms	NP_391931.1	yes	cdnD	-	4163643	4165622	1980	CDS	9.28525	0.39091	0.20369	0.301749	0.443099	0.149956	0.244953	1.31122	0.301749	1.35952	0.244953	492.892
imidazolone-5-propionate hydrolase	COG1228	Secondary metabolites biosynthesis, transport and catabolism	NP_391816.1	-	hutI	+	4045245	4046510	1266	CDS	2.40825	-0.478876	0.216458	0.316605	0.442939	0.236533	0.349772	-1.39366	0.316605	1.35937	0.349772	4.80065
transcription translation coupling factor involved in Rho-dependent transcription termination	COG0195	Transcription	NP_389542.1	-	nusA	+	1732281	1733396	1116	CDS	8.70393	0.0416356	0.901789	0.933159	0.442887	0.190178	0.294264	1.02928	0.933159	1.35932	0.294264	417.334
conserved hypothetical protein	COG4475	Function unknown	NP_391572.1	-	ywlG	-	3790644	3791186	543	CDS	7.08611	-0.465825	0.109414	0.185306	0.442159	0.127963	0.216401	-1.38111	0.185306	1.35864	0.216401	136.088
putative RNA/thiamine triphosphatase	COG4116	Function unknown	NP_389040.1	-	yjbK	-	1235912	1236484	573	CDS	3.92909	0.175777	0.632445	0.725956	0.44123	0.231886	0.344536	1.12957	0.725956	1.35776	0.344536	13.1294
tRNA-His	undefined	undefined			trnD-His	+	952495	952570	76	tRNA	2.61572	-1.85297	7.1897e-06	4.37889e-05	0.439403	0.233383	0.345613	-3.61243	4.37889e-05	1.35604	0.345613	7.7552
putative processing protease	COG0612	General function prediction only	NP_389568.2	-	ymfH	+	1758314	1759600	1287	CDS	8.24898	1.05197	0.000199015	0.000842224	0.437943	0.119091	0.205148	2.07336	0.000842224	1.35467	0.205148	179.469
conserved hypothetical protein	undefined	undefined	NP_389570.1	-	ymfJ	+	1760464	1760721	258	CDS	4.33534	0.751325	0.0681979	0.124867	0.434721	0.295177	0.412846	1.68334	0.124867	1.35165	0.412846	12.5584
bacillithiol S-transferase	COG2318	Function unknown	NP_388720.1	-	bst	+	913924	914460	537	CDS	5.11759	-1.14465	9.28356e-05	0.000430124	0.434081	0.128049	0.216401	-2.21092	0.000430124	1.35105	0.216401	39.6589
secondary transporter of divalent metal ions/citrate complexes	COG2851	Energy production and conversion	NP_391785.2	yes	citH	+	4010404	4011684	1281	CDS	2.13822	-0.0253798	0.951536	0.968383	0.433647	0.293862	0.411146	-1.01775	0.968383	1.35064	0.411146	3.47768
RNA polymerase sigma-37 factor (sigma(B))	COG1191	Transcription	NP_388354.2	-	sigB	+	522862	523650	789	CDS	10.0633	0.10683	0.825955	0.879291	0.432468	0.374225	0.496187	1.07686	0.879291	1.34954	0.496187	886.718
putative transporter	COG0730	Function unknown	NP_390806.1	yes	ytnM	-	2998796	2999698	903	CDS	0.822961	-0.120031	0.83723	0.888529	0.432288	0.455518	0.578738	-1.08676	0.888529	1.34937	0.578738	1.39045
cell-division protein essential fo Z-ring assembly	COG0849	Cell cycle control, cell division, chromosome partitioning	NP_389411.2	-	ftsA	+	1596474	1597796	1323	CDS	8.88714	0.713981	0.0197965	0.0447987	0.432164	0.157453	0.254969	1.64032	0.0447987	1.34926	0.254969	324.759
inhibitor of the pro-sigma(K) processing machinery	undefined	undefined	NP_387904.2	yes	bofA	+	29772	30035	264	CDS	2.68073	-0.96016	0.0525983	0.10099	0.43158	0.368145	0.490183	-1.94553	0.10099	1.34871	0.490183	7.36557
glucose-6-phosphate 1-dehydrogenase	COG0364	Carbohydrate transport and metabolism	NP_390266.2	-	zwf	+	2479156	2480625	1470	CDS	9.64971	0.856018	0.0038292	0.0109913	0.431424	0.143092	0.237089	1.81004	0.0109913	1.34856	0.237089	527.086
conserved hypothetical protein	undefined	undefined	NP_387903.1	-	yaaL	+	29481	29705	225	CDS	5.06868	0.186423	0.609814	0.706943	0.431179	0.239047	0.352473	1.13794	0.706943	1.34833	0.352473	27.6078
putative hydrolase	COG1335	Coenzyme transport and metabolism|General function prediction only	NP_391530.2	-	ywoC	-	3755291	3755860	570	CDS	4.50977	-1.85766	9.34032e-09	1.05335e-07	0.430585	0.15534	0.252343	-3.62419	1.05335e-07	1.34778	0.252343	28.4704
malate dehydrogenase	COG0039	Energy production and conversion	NP_390790.1	1	mdh	-	2978734	2979672	939	CDS	9.079	-0.0779126	0.801966	0.860429	0.429962	0.16711	0.266833	-1.05549	0.860429	1.3472	0.266833	510.104
D-serine ammonia-lyase	COG3048	Amino acid transport and metabolism	NP_390258.2	yes	dsdA	-	2469580	2470926	1347	CDS	6.30851	-0.194654	0.485069	0.595456	0.429195	0.123855	0.210876	-1.14445	0.595456	1.34648	0.210876	69.4886
putative permease	COG2814	Carbohydrate transport and metabolism	NP_388390.1	yes	yddS	+	554669	555979	1311	CDS	2.50364	-0.268275	0.463369	0.575182	0.429166	0.23213	0.344628	-1.20437	0.575182	1.34646	0.344628	5.67855
putative membrane protein, acid tolerance protein	COG4980	General function prediction only	NP_388881.1	1	yhaH	-	1073895	1074251	357	CDS	6.9517	1.08313	0.0017435	0.00565004	0.428923	0.212575	0.321299	2.11863	0.00565004	1.34623	0.321299	73.8361
two-component response regulator	COG0745	Signal transduction mechanisms|Transcription	NP_390789.2	-	phoP	-	2977800	2978522	723	CDS	5.10434	0.409091	0.166639	0.25823	0.427534	0.151261	0.246694	1.32785	0.25823	1.34493	0.246694	25.2471
extracytoplasmic thioredoxin involved in cytochrome c maturation (lipoprotein)	COG0526	Posttranslational modification, protein turnover, chaperones	NP_390196.2	1	resA	-	2420804	2421343	540	CDS	7.06841	-1.70851	1.82331e-08	1.94913e-07	0.427512	0.145895	0.24004	-3.26824	1.94913e-07	1.34491	0.24004	156.408
putative permease	COG0628	General function prediction only	NP_390619.1	yes	yrrI	-	2801141	2802202	1062	CDS	2.10664	-0.0210975	0.955971	0.971833	0.426665	0.260602	0.376151	-1.01473	0.971833	1.34412	0.376151	3.21141
putative enzyme	undefined	undefined	NP_388590.2	-	yetA	+	776834	779407	2574	CDS	3.27151	-1.88474	9.2607e-07	6.91185e-06	0.42513	0.224765	0.335533	-3.69288	6.91185e-06	1.34269	0.335533	12.0318
sporulation-specific L-Ala-D-Glu endopeptidase	COG0739	Cell wall/membrane/envelope biogenesis			lytH	+	3321455	3322435	981	CDS	3.67399	-0.00640004	0.984553	0.990586	0.424268	0.202092	0.309547	0.995574	0.990586	1.34189	0.309547	10.9063
T-box riboswitch controlling synthesis of histidine and aspartate tRNA ligases	undefined	undefined			tboH	-	2817899	2818131	233	No_CDS	8.21684	0.927189	0.0191435	0.0435852	0.422809	0.282716	0.399363	1.90157	0.0435852	1.34053	0.399363	186.507
hypothetical protein	undefined	undefined	NP_391553.1	yes	ywmE	-	3774400	3774561	162	CDS	5.71608	-0.309407	0.537951	0.64344	0.422662	0.400146	0.523121	-1.2392	0.64344	1.3404	0.523121	52.2298
UDP-N-acetylmuramoylalanyl-D-glutamate-2, 6-diaminopimelate ligase	COG0769	Cell wall/membrane/envelope biogenesis	NP_389401.1	-	murE	+	1586330	1587814	1485	CDS	9.14869	0.338555	0.274301	0.382734	0.422097	0.173312	0.274278	1.26449	0.382734	1.33987	0.274278	466.321
putative DNA-modified purine glycosidase	COG0122	Replication, recombination and repair	NP_388682.1	-	yfjP	+	872425	873288	864	CDS	4.10376	-0.162288	0.590409	0.689315	0.420212	0.162591	0.261124	-1.11906	0.689315	1.33812	0.261124	15.9206
conserved hypothetical protein	COG5504	Function unknown	NP_389095.2	-	yjfC	+	1283463	1284362	900	CDS	0.238594	-1.38159	0.0604286	0.113425	0.419631	0.503625	0.62402	-2.60556	0.113425	1.33759	0.62402	0.992297
transfer-messenger RNA (tmRNA, 10Sa RNA)	undefined	undefined			ssrA	-	3450712	3451071	360	No_CDS	13.9265	0.311214	0.319779	0.43124	0.4192	0.180551	0.282887	1.24075	0.43124	1.33719	0.282887	12332.7
spore coat associated protein	COG0189	Coenzyme transport and metabolism|Translation, ribosomal structure and biogenesis	NP_388858.2	-	yheD	-	1050811	1052172	1362	CDS	3.62934	2.94419	5.46301e-10	7.86865e-09	0.418052	0.39244	0.51551	7.69644	7.86865e-09	1.33612	0.51551	3.50576
tryptophan transporter	undefined	undefined	NP_388882.2	yes	trpP	-	1074646	1075164	519	CDS	7.78825	1.21584	6.35884e-05	0.000307819	0.417227	0.166113	0.265535	2.32277	0.000307819	1.33536	0.265535	133.728
putative permease	COG0697	Carbohydrate transport and metabolism|Amino acid transport and metabolism|General function prediction only	NP_388404.1	yes	ydeK	-	570371	571234	864	CDS	3.18092	0.108161	0.802551	0.860429	0.416935	0.339011	0.46035	1.07785	0.860429	1.33509	0.46035	5.53035
hypothetical protein	undefined	undefined			yrzN	-	2714590	2714805	216	CDS	0.282371	1.43017	0.0449016	0.0882763	0.416533	0.605473	0.71401	2.69478	0.0882763	1.33472	0.71401	0.482843
nicotinate-nucleotide pyrophosphorylase	COG0157	Coenzyme transport and metabolism	NP_390664.1	-	nadC	-	2847048	2847917	870	CDS	1.38658	-1.15751	0.0161228	0.037562	0.415393	0.334614	0.455736	-2.23073	0.037562	1.33366	0.455736	2.75518
putative transcriptional regulator (LysR family)	COG0583	Transcription	NP_390564.1	-	yraN	-	2745594	2746463	870	CDS	2.59098	-1.58012	0.000176844	0.000764151	0.413721	0.283337	0.399827	-2.98996	0.000764151	1.33212	0.399827	7.62993
phosphotransferase system (PTS) N-acetylglucosamine-specific enzyme IICB component	COG1263	Carbohydrate transport and metabolism	NP_388651.1	yes	nagP	+	840656	842014	1359	CDS	8.99038	0.764674	0.029796	0.063162	0.413327	0.238683	0.352064	1.69899	0.063162	1.33175	0.352064	332.077
protein required for the switch from F to G during sporulation (anti sigma F)	undefined	undefined	NP_387935.1	-	fin	+	60130	60360	231	CDS	6.59532	-0.801645	0.0105034	0.025772	0.411825	0.185334	0.288399	-1.74309	0.025772	1.33037	0.288399	109.724
putative nucleotide binding protein, phage SPbeta	undefined	undefined	NP_389969.1	-	yopJ	-	2210331	2210747	417	CDS	2.28696	-0.367419	0.368071	0.483498	0.411154	0.304343	0.422642	-1.29004	0.483498	1.32975	0.422642	4.69199
putative lipoprotein, putative esterase	COG2755	Amino acid transport and metabolism	NP_390447.1	-	yqeF	-	2647920	2648651	732	CDS	5.42426	0.0402992	0.892002	0.927239	0.410844	0.167627	0.26712	1.02833	0.927239	1.32946	0.26712	38.6265
putative exported hydrolase	COG2312	Secondary metabolites biosynthesis, transport and catabolism	NP_388113.1	1	ybfO	+	249979	251319	1341	CDS	3.919	-2.16313	4.00009e-07	3.29065e-06	0.409848	0.298753	0.41613	-4.47885	3.29065e-06	1.32855	0.41613	19.2114
fatty acid beta-hydroxylating cytochrome P450	COG2124	Secondary metabolites biosynthesis, transport and catabolism|Defense mechanisms	NP_388092.1	1	cypC	+	229525	230778	1254	CDS	6.59953	-0.111499	0.840713	0.891417	0.409827	0.460744	0.583752	-1.08035	0.891417	1.32853	0.583752	83.1676
tRNA-Glu	undefined	undefined			trnS-Glu	+	528903	528974	72	tRNA	1.43521	-2.60453	2.81953e-06	1.87588e-05	0.409057	0.349861	0.471032	-6.08192	1.87588e-05	1.32782	0.471032	3.45195
putative integral inner membrane protein	undefined	undefined	NP_388185.2	yes	ycgB	+	326888	327469	582	CDS	4.61813	-0.146415	0.742763	0.814294	0.40899	0.359243	0.480669	-1.10682	0.814294	1.32776	0.480669	20.878
putative efflux transporter	undefined	undefined	NP_388627.1	yes	yfmI	-	819311	820531	1221	CDS	3.61097	0.951636	0.0257942	0.0562022	0.408061	0.34379	0.464688	1.93406	0.0562022	1.3269	0.464688	9.06904
glucose kinase	COG1940	Transcription|Carbohydrate transport and metabolism	NP_390365.2	-	glcK	-	2570606	2571571	966	CDS	6.12348	0.513092	0.0904002	0.157912	0.407368	0.17994	0.28236	1.42711	0.157912	1.32626	0.28236	53.2433
UDP-N-acetylglucosamine 1-carboxyvinyltransferase	COG0766	Cell wall/membrane/envelope biogenesis	NP_391591.2	-	murAB	-	3806086	3807375	1290	CDS	9.45305	-0.684307	0.0256184	0.0558786	0.407164	0.182709	0.285504	-1.60693	0.0558786	1.32608	0.285504	688.86
membrane bound lipoprotein	undefined	undefined	NP_391444.1	-	lytA	-	3662789	3663097	309	CDS	5.18861	-3.52051	7.50444e-17	3.11169e-15	0.40672	0.272599	0.390038	-11.4757	3.11169e-15	1.32567	0.390038	56.6141
putative enzyme with rhodanese domain	COG1054	General function prediction only	NP_388115.1	-	ybfQ	+	252514	253482	969	CDS	8.481	0.718456	0.0177461	0.0407427	0.406173	0.179222	0.281664	1.64542	0.0407427	1.32517	0.281664	244.449
conserved hypothetical protein	COG2105	General function prediction only	NP_389333.1	-	ykqA	+	1519635	1520468	834	CDS	6.08482	-0.0970394	0.742068	0.814235	0.405092	0.170064	0.269958	-1.06958	0.814235	1.32417	0.269958	63.6129
methylphosphotriester-DNA alkyltransferase and transcriptional regulator (AraC/XylS family)	COG2169	Replication, recombination and repair	NP_388062.1	1	adaA	+	203729	204364	636	CDS	0.621488	0.364996	0.620062	0.715389	0.404523	0.587279	0.697361	1.28788	0.715389	1.32365	0.697361	0.986272
urease (beta subunit)	COG0832	Amino acid transport and metabolism	NP_391546.1	-	ureB	-	3768420	3768794	375	CDS	1.5789	-1.45446	0.00555015	0.0149989	0.404114	0.391645	0.514794	-2.74055	0.0149989	1.32328	0.514794	3.36329
activation of degradative enzymes (aprE, nprE, sacB) production or activity	undefined	undefined	NP_390077.1	-	degR	-	2308157	2308339	183	CDS	0.638264	0.363702	0.539975	0.644954	0.403637	0.507134	0.626855	1.28672	0.644954	1.32284	0.626855	1.02318
arabinan endo-1,5-alpha-L-arabinosidase	COG3507	Carbohydrate transport and metabolism	NP_391812.2	1	abnB	-	4039466	4040875	1410	CDS	1.80556	-1.93418	0.00237748	0.00730504	0.403268	0.466996	0.589127	-3.82161	0.00730504	1.3225	0.589127	2.71857
hypothetical protein	undefined	undefined	NP_390253.1	-	yqzH	+	2465966	2466172	207	CDS	3.04074	-0.39153	0.262047	0.369277	0.401936	0.241704	0.354863	-1.31178	0.369277	1.32128	0.354863	8.18202
deoxyribose-phosphate aldolase	COG0274	Nucleotide transport and metabolism	NP_391821.2	-	deoC	-	4051602	4052273	672	CDS	8.41296	-1.16394	0.00219887	0.00687983	0.401136	0.285327	0.402221	-2.24068	0.00687983	1.32055	0.402221	372.561
ferredoxin-NADP+ reductase	COG0492	Posttranslational modification, protein turnover, chaperones			yumC	+	3301586	3302584	999	CDS	9.40965	-0.108078	0.711726	0.793491	0.39922	0.172877	0.274001	-1.07779	0.793491	1.31879	0.274001	626.468
pro-sigma(E) endopeptidase (stage II sporulation)	undefined	undefined	NP_391578.1	1	spoIIR	-	3794676	3795350	675	CDS	4.06775	1.01316	0.00742663	0.0191377	0.398953	0.297059	0.41449	2.01833	0.0191377	1.31855	0.41449	11.755
glucose 1-dehydrogenase	COG1028	Lipid transport and metabolism|Secondary metabolites biosynthesis, transport and catabolism|General function prediction only	NP_388275.1	-	gdh	+	445344	446129	786	CDS	1.60645	1.1918	0.0139009	0.0328894	0.395649	0.456592	0.579743	2.28438	0.0328894	1.31553	0.579743	1.46455
heptaprenylglyceryl-phosphate synthase	COG1646	Lipid transport and metabolism	NP_388542.1	1	pcrB	+	718622	719308	687	CDS	5.7209	0.388151	0.315193	0.426456	0.395197	0.307635	0.426347	1.30872	0.426456	1.31512	0.426347	42.5029
murein L,D:-endopeptidase	COG1876	Cell wall/membrane/envelope biogenesis	NP_388163.1	1	cwlK	-	303804	304307	504	CDS	3.9189	-1.29754	4.19756e-05	0.000214582	0.394099	0.191404	0.295492	-2.45809	0.000214582	1.31412	0.295492	18.421
putative nucleic acid binding protein	undefined	undefined	NP_388775.1	-	yhbD	+	970667	971383	717	CDS	3.87955	0.571426	0.413847	0.52973	0.392288	0.575752	0.688654	1.48599	0.52973	1.31247	0.688654	9.7623
ribosomal protein L34	COG0230	Translation, ribosomal structure and biogenesis	NP_391986.1	-	rpmH	-	4215255	4215389	135	CDS	9.54094	-0.182746	0.57616	0.678335	0.390853	0.232399	0.344778	-1.13504	0.678335	1.31117	0.344778	742.591
transcriptional regulator (IclR family)	COG1414	Transcription	NP_388291.2	yes	kipR	+	461615	462367	753	CDS	4.83612	-2.89928	2.25919e-08	2.34784e-07	0.390759	0.410086	0.533905	-7.46054	2.34784e-07	1.31108	0.533905	39.4028
putative transcriptional regulator (TetR/AcrR family)	COG1309	Transcription	NP_388413.1	-	ydeS	+	578337	578933	597	CDS	4.98243	-1.26606	9.87621e-05	0.000451971	0.390683	0.216279	0.325821	-2.40504	0.000451971	1.31101	0.325821	38.2387
protein acetyltransferase	undefined	undefined			acuA	+	3040092	3040724	633	CDS	5.07936	0.168838	0.594541	0.693546	0.387973	0.223644	0.334691	1.12415	0.693546	1.30855	0.334691	25.9237
negative regulator of the activity of sigma-M	undefined	undefined	NP_388831.1	yes	yhdK	-	1028233	1028523	291	CDS	6.02222	3.08045	4.03575e-14	1.13201e-12	0.387759	0.319147	0.438894	8.4588	1.13201e-12	1.30836	0.438894	18.199
menaquinone-specific isochorismate synthase	COG1169	Coenzyme transport and metabolism|Secondary metabolites biosynthesis, transport and catabolism			menF	-	3152302	3153717	1416	CDS	8.69145	0.207293	0.481797	0.592682	0.387338	0.189355	0.293101	1.15452	0.592682	1.30798	0.293101	327.856
tRNA-Ala	undefined	undefined			trnI-Ala	+	166253	166328	76	tRNA	3.59655	-0.643265	0.0635666	0.117966	0.385316	0.256652	0.372282	-1.56186	0.117966	1.30615	0.372282	12.2612
DNA polymerase III (gamma and tau subunits)	COG2812	Replication, recombination and repair	NP_387900.2	-	dnaX	+	26814	28505	1692	CDS	8.2288	1.51307	8.86024e-07	6.67299e-06	0.384819	0.203678	0.311279	2.85416	6.67299e-06	1.3057	0.311279	150.947
conserved hypothetical protein, phage SPbeta	undefined	undefined	NP_389962.1	-	yopQ	-	2205193	2206575	1383	CDS	6.06884	0.906046	0.0245695	0.0540597	0.384459	0.338589	0.460081	1.8739	0.0540597	1.30537	0.460081	53.6056
thiamine-monophosphate kinase	COG0611	Coenzyme transport and metabolism	NP_388471.1	-	thiL	+	640662	641639	978	CDS	7.46351	0.467696	0.14995	0.237846	0.384354	0.237077	0.350451	1.3829	0.237846	1.30528	0.350451	128.631
ribosomal protein L31	COG0254	Translation, ribosomal structure and biogenesis			rpmEB	-	3138978	3139226	249	CDS	5.7008	0.193955	0.650422	0.740222	0.383249	0.371379	0.493529	1.1439	0.740222	1.30428	0.493529	47.8612
hypothetical protein	undefined	undefined		yes	yhzG	+	1000027	1000218	192	CDS	1.36899	-0.48657	0.352044	0.466777	0.3825	0.444448	0.567429	-1.40111	0.466777	1.3036	0.567429	2.12986
biosynthesis of the pyrimidine moiety from 5-aminoimidazole ribotide (AIR) (thiamin biosynthesis)	COG0422	Coenzyme transport and metabolism	NP_388759.2	-	thiC	+	955895	957667	1773	CDS	5.64015	1.09517	0.000126552	0.000567031	0.38127	0.184374	0.28756	2.13638	0.000567031	1.30249	0.28756	33.0508
thiamine-phosphate pyrophosphorylase	COG0352	Coenzyme transport and metabolism	NP_391708.1	-	thiE	-	3930707	3931375	669	CDS	6.43856	-0.149973	0.62421	0.718157	0.381265	0.213654	0.3228	-1.10955	0.718157	1.30248	0.3228	80.4637
putative acyl-coenzyme A synthetase	COG0365	Lipid transport and metabolism	NP_390834.2	-	ytcI	-	3023677	3025266	1590	CDS	7.94387	-0.355193	0.219847	0.319976	0.381125	0.187842	0.291419	-1.27916	0.319976	1.30236	0.291419	240.71
putative Bifunctional rhamnulose-1-phosphate aldolase/alcohol dehydrogenase	COG1028	Lipid transport and metabolism|Secondary metabolites biosynthesis, transport and catabolism|General function prediction only			rhaD	-	3201860	3203929	2070	CDS	5.07291	-0.307959	0.459182	0.571368	0.380901	0.360127	0.481647	-1.23795	0.571368	1.30215	0.481647	30.0073
putative purine/pyrimidine permease	COG2233	Nucleotide transport and metabolism	NP_391673.2	yes	ywdJ	-	3894463	3895785	1323	CDS	8.12302	-0.41057	0.169893	0.261533	0.378923	0.204895	0.312674	-1.32921	0.261533	1.30037	0.312674	262.765
putative oxidoreductase	COG0262	Coenzyme transport and metabolism	NP_391603.1	1	ywjB	-	3819220	3819744	525	CDS	8.46382	-0.876131	0.0121945	0.0293672	0.378461	0.275643	0.393024	-1.83545	0.0293672	1.29995	0.393024	372.545
transcriptional regulator (MerR family) of metal efflux transporter expression	COG0789	Transcription	NP_388620.1	-	yfmP	+	812140	812562	423	CDS	5.23213	-0.7194	0.0172451	0.039748	0.378353	0.205057	0.312805	-1.6465	0.039748	1.29986	0.312805	39.9685
conserved hypothetical protein	undefined	undefined	NP_388175.1	1	yceG	+	314883	316496	1614	CDS	8.35993	0.543136	0.080225	0.14306	0.378197	0.222958	0.333909	1.45714	0.14306	1.29972	0.333909	255.991
putative acyl-CoA hydrolase	COG1607	Lipid transport and metabolism	NP_389186.2	-	ykhA	+	1372035	1372553	519	CDS	6.5231	-0.00305201	0.991521	0.994769	0.378051	0.188754	0.29228	0.997887	0.994769	1.29959	0.29228	90.1991
menaquinol:cytochrome c oxidoreductase (iron-sulfur subunit)	COG0723	Energy production and conversion	NP_390137.1	1	qcrA	-	2364589	2365092	504	CDS	5.30621	-0.89207	0.00395038	0.0112691	0.37802	0.214797	0.324051	-1.85584	0.0112691	1.29956	0.324051	39.3354
putative ribosomal protein N-acetyltransferase	COG1670	Translation, ribosomal structure and biogenesis|Posttranslational modification, protein turnover, chaperones	NP_388302.1	-	ydaF	+	473174	473725	552	CDS	2.90997	-0.311412	0.356441	0.471693	0.377659	0.257191	0.372776	-1.24092	0.471693	1.29923	0.372776	7.57302
alpha-D-galactoside galactohydrolase	COG1486	Carbohydrate transport and metabolism			melA	+	3100881	3102179	1299	CDS	4.72494	0.922655	0.00187793	0.00600383	0.37663	0.212398	0.321299	1.8956	0.00600383	1.29831	0.321299	16.3865
conserved hypothetical protein	undefined	undefined	NP_389652.1	1	yncM	-	1903511	1904263	753	CDS	4.89123	1.82939	3.38714e-07	2.8361e-06	0.375563	0.297994	0.41537	3.55386	2.8361e-06	1.29735	0.41537	14.174
putative integral inner membrane protein	undefined	undefined	NP_391611.1	yes	ywiC	+	3830761	3831480	720	CDS	2.71449	-2.06218	6.74895e-08	6.58063e-07	0.375375	0.256459	0.372253	-4.17617	6.58063e-07	1.29718	0.372253	8.2429
putative transcriptional regulator (MarR family)	COG1846	Transcription	NP_390053.1	-	ypoP	+	2288194	2288619	426	CDS	6.87621	1.67862	1.55937e-08	1.69794e-07	0.3753	0.199575	0.306263	3.20122	1.69794e-07	1.29711	0.306263	63.0051
putative transporter	COG0697	Carbohydrate transport and metabolism|Amino acid transport and metabolism|General function prediction only	NP_391643.1	yes	ywfM	-	3862357	3863247	891	CDS	4.02265	-1.59251	7.31018e-06	4.4391e-05	0.375093	0.264036	0.380038	-3.01573	4.4391e-05	1.29692	0.380038	20.2769
putative hydrolase	COG0457	General function prediction only	NP_390702.2	-	ysoA	-	2887817	2888821	1005	CDS	5.45023	-0.00200788	0.99463	0.997302	0.374867	0.209582	0.318053	0.998609	0.997302	1.29672	0.318053	42.8084
molecular chaperone	COG0443	Posttranslational modification, protein turnover, chaperones	NP_390425.1	-	dnaK	-	2626112	2627947	1836	CDS	10.6504	-0.165516	0.578664	0.680245	0.374705	0.209177	0.317556	-1.12157	0.680245	1.29657	0.317556	1574.85
malate glucosamine cysteine ligase	COG4365	Function unknown	NP_389395.2	-	bshC	+	1578376	1579995	1620	CDS	7.69507	-0.250627	0.392421	0.507686	0.374523	0.20138	0.308786	-1.18972	0.507686	1.29641	0.308786	190.583
A/G-specific adenine glycosylase or DNA-(apurinic or apyrimidinic site) lyase	COG1194	Replication, recombination and repair	NP_388743.1	-	mutY	+	935656	936765	1110	CDS	7.39659	0.777996	0.00663366	0.0173668	0.374425	0.190991	0.294966	1.71475	0.0173668	1.29632	0.294966	104.491
conserved hypothetical protein	undefined	undefined	YP_003097760.1	1	yqzK	-	2449489	2449716	228	CDS	4.5707	-0.0620322	0.841037	0.891417	0.373963	0.227946	0.33989	-1.04394	0.891417	1.29591	0.33989	20.9621
putative methylase with RNA interaction domain	COG0116	Translation, ribosomal structure and biogenesis	NP_390099.1	-	ypsC	-	2330075	2331232	1158	CDS	9.52872	3.31625	1.1299e-20	7.99699e-19	0.373026	0.254504	0.37008	9.96073	7.99699e-19	1.29507	0.37008	150.742
ribose 5-phosphate epimerase	COG0698	Carbohydrate transport and metabolism	NP_391573.1	-	ywlF	-	3791199	3791648	450	CDS	7.14352	-0.41488	0.149098	0.237319	0.373025	0.193988	0.298919	-1.33319	0.237319	1.29507	0.298919	146.66
component of the germination receptor GerA	undefined	undefined			gerAC	+	3393293	3394414	1122	CDS	1.4586	0.675251	0.113526	0.19115	0.371675	0.412081	0.536139	1.59687	0.19115	1.29385	0.536139	1.93681
conserved hypothetical protein	COG5506	Function unknown			yueI	-	3261539	3261937	399	CDS	5.93846	0.0160441	0.952219	0.968738	0.37055	0.16741	0.266905	1.01118	0.968738	1.29285	0.266905	57.1155
copper insertion chaperone and transporter component	COG2608	Inorganic ion transport and metabolism	NP_391231.1	-	copZ	-	3443613	3443822	210	CDS	4.76097	-0.699297	0.0220634	0.0491783	0.369814	0.219996	0.330195	-1.62371	0.0491783	1.29219	0.330195	30.8345
cyclohexenol-containing tetrahydro-4-hydroxyphenylpyruvate H(4)HPP in bacilysin	COG1028	Lipid transport and metabolism|Secondary metabolites biosynthesis, transport and catabolism|General function prediction only	NP_391648.1	-	bacH	+	3867493	3868272	780	CDS	3.72521	-0.935306	0.00451001	0.0125857	0.36966	0.247549	0.36189	-1.9123	0.0125857	1.29205	0.36189	16.2326
conserved hypothetical protein	COG3878	Function unknown	NP_391503.1	-	ywqG	-	3728511	3729296	786	CDS	5.14449	0.0403708	0.897266	0.930826	0.369509	0.23843	0.351944	1.02838	0.930826	1.29191	0.351944	32.7965
putative membrane protein	COG4956	General function prediction only	NP_387970.1	yes	yacL	+	108674	109774	1101	CDS	9.37978	0.60752	0.0488865	0.094794	0.369466	0.230171	0.342586	1.52364	0.094794	1.29187	0.342586	507.372
putative integral inner membrane protein	undefined	undefined	NP_391835.1	yes	yxeG	-	4064536	4065093	558	CDS	3.63869	-0.42408	0.23389	0.336765	0.368124	0.296125	0.413607	-1.34172	0.336765	1.29067	0.413607	12.6257
putative transporter	COG0861	Inorganic ion transport and metabolism	NP_389227.1	yes	ykoY	+	1410654	1411628	975	CDS	5.22025	-0.170565	0.616455	0.71263	0.367557	0.280516	0.397227	-1.1255	0.71263	1.29017	0.397227	37.9926
putative glycosyl hydrolase lipoprotein	COG3405	Carbohydrate transport and metabolism	NP_388308.1	1	ydaJ	+	478944	480032	1089	CDS	5.21053	-0.681369	0.0609551	0.114204	0.367433	0.308408	0.427275	-1.60366	0.114204	1.29006	0.427275	39.688
essential component of heme biosynthesis, catalase activity	COG3253	Inorganic ion transport and metabolism			hemQ	+	3866596	3867360	765	CDS	8.25355	-0.305596	0.303396	0.414842	0.367209	0.216294	0.325821	-1.23593	0.414842	1.28986	0.325821	305.232
putative phosphotransferase	COG3173	General function prediction only	NP_388134.1	-	ycbJ	+	275838	276758	921	CDS	5.76133	-0.534961	0.0611814	0.114523	0.364818	0.1994	0.30611	-1.4489	0.114523	1.28772	0.30611	54.0586
two-component response regulator YvrH involved in cell wall processes [YvrG]	COG0745	Signal transduction mechanisms|Transcription	NP_391202.2	-	yvrH	-	3408353	3409066	714	CDS	3.6011	-1.16905	0.000267968	0.00108696	0.363986	0.23317	0.345441	-2.24863	0.00108696	1.28698	0.345441	14.8261
putative integral inner membrane protein	undefined	undefined	NP_388769.1	yes	ygaO	-	966196	966669	474	CDS	5.60344	-0.841185	0.00454238	0.0126503	0.363562	0.214047	0.323156	-1.79152	0.0126503	1.2866	0.323156	57.2595
hypothetical protein	undefined	undefined	NP_389636.1	-	ynaF	+	1884968	1885321	354	CDS	1.51913	-1.4923	0.00101381	0.00354023	0.362134	0.356782	0.478624	-2.81337	0.00354023	1.28533	0.478624	3.41049
mannitol-1-phosphate dehydrogenase	COG0246	Carbohydrate transport and metabolism	NP_388281.2	-	mtlD	+	451618	452739	1122	CDS	8.52827	-2.68093	5.51042e-05	0.000270902	0.362103	0.562231	0.678013	-6.41267	0.000270902	1.2853	0.678013	482.247
manganese ABC transporter (manganese binding lipoprotein)	COG0803	Inorganic ion transport and metabolism			mntA	-	3145038	3145958	921	CDS	8.5355	-0.40541	0.540002	0.644954	0.361581	0.58451	0.695281	-1.32447	0.644954	1.28483	0.695281	295.966
flavohemoglobin	COG1017	Energy production and conversion	NP_389187.1	-	hmp	+	1372792	1373991	1200	CDS	2.25017	-0.617538	0.339808	0.453041	0.361255	0.569302	0.683567	-1.53425	0.453041	1.28454	0.683567	4.29266
two-component sensor histidine kinase [YvqC] sensing cell wall stress	COG4585	Signal transduction mechanisms			liaS	-	3395035	3396117	1083	CDS	5.64207	-0.729041	0.0147365	0.0346865	0.360051	0.224	0.334858	-1.65754	0.0346865	1.28347	0.334858	52.9659
putative acetyltransferase	COG0456	Translation, ribosomal structure and biogenesis	NP_391866.2	-	yxbD	-	4095356	4095835	480	CDS	1.37277	-2.50457	1.48022e-06	1.04945e-05	0.359078	0.365271	0.487287	-5.67482	1.04945e-05	1.28261	0.487287	3.23655
oligo-alpha-mannoside phosphotransferase system enzyme IIB	COG1440	Carbohydrate transport and metabolism	NP_388462.1	-	gmuB	+	626622	626933	312	CDS	3.77426	-1.8011	0.000684083	0.00250953	0.358802	0.479271	0.60147	-3.48486	0.00250953	1.28236	0.60147	17.2847
transcriptional regulator of extracellular protease production, sporulation and bacilysin production	COG1846	Transcription	NP_388880.1	-	scoC	-	1073106	1073717	612	CDS	5.76241	-0.499102	0.136055	0.222194	0.358756	0.28215	0.398701	-1.41333	0.222194	1.28232	0.398701	60.3881
tmRNA-binding protein	COG0691	Posttranslational modification, protein turnover, chaperones	NP_391240.1	-	smpB	-	3451248	3451718	471	CDS	6.99195	-0.653214	0.0465939	0.0912102	0.358499	0.272526	0.390038	-1.57267	0.0912102	1.28209	0.390038	143.416
putative transcriptional regulator	COG1309	Transcription	NP_389788.1	-	yobS	-	2081172	2081747	576	CDS	2.94732	-0.365381	0.313026	0.423663	0.356811	0.320173	0.439863	-1.28822	0.423663	1.28059	0.439863	7.78754
L-aspartate/L-glutamate permease	COG0531	Amino acid transport and metabolism	NP_391327.1	yes	yveA	+	3539165	3540727	1563	CDS	2.08289	1.73599	0.000184079	0.000789597	0.356581	0.494834	0.616434	3.33107	0.000789597	1.28039	0.616434	1.72598
ribonuclease R	COG0557	Transcription	NP_391241.1	-	rnr	-	3451863	3454202	2340	CDS	9.05638	-0.126748	0.720535	0.799621	0.355995	0.315542	0.434996	-1.09183	0.799621	1.27987	0.434996	491.769
putative translation regulator	COG1739	General function prediction only	NP_391431.1	-	yvyE	+	3646753	3647406	654	CDS	7.39091	1.9128	4.8938e-08	4.86418e-07	0.35552	0.297837	0.415292	3.76538	4.86418e-07	1.27945	0.415292	86.0952
ribonuclease PH	COG0689	Translation, ribosomal structure and biogenesis	NP_390715.1	-	rph	-	2901154	2901891	738	CDS	7.38092	-0.592253	0.084074	0.149211	0.355283	0.298524	0.415968	-1.5076	0.149211	1.27924	0.415968	167.554
putative anionic nitroalkane dioxygenase	COG2070	General function prediction only	NP_390557.1	-	yrpB	+	2736915	2737958	1044	CDS	4.43892	0.842583	0.00375043	0.0108189	0.355147	0.231283	0.343992	1.79326	0.0108189	1.27912	0.343992	14.932
isomerase component of bacilysin (l-alanine-[2,3-epoxycyclohexano-4]-l-alanine) synthetase	COG1917	General function prediction only	NP_391653.1	-	bacB	-	3872869	3873576	708	CDS	2.05294	0.349933	0.424984	0.540613	0.354584	0.432428	0.555592	1.2745	0.540613	1.27862	0.555592	2.60991
gamma-aminobutyrate (GABA) permease	COG1113	Amino acid transport and metabolism	NP_388512.2	yes	gabP	-	685155	686564	1410	CDS	3.82125	-1.79865	1.6718e-06	1.16317e-05	0.354038	0.31546	0.434996	-3.47895	1.16317e-05	1.27813	0.434996	18.652
putative membrane metalloprotease	COG0501	Posttranslational modification, protein turnover, chaperones	NP_388910.1	yes	yhfN	+	1103104	1104384	1281	CDS	4.92744	-0.607926	0.0515215	0.0992938	0.352845	0.254218	0.369928	-1.52407	0.0992938	1.27708	0.369928	31.9765
putative DNA wielding protein, phage SPbeta	COG5444	Defense mechanisms	NP_390041.2	-	yokI	-	2275706	2277421	1716	CDS	4.86326	0.626696	0.0902733	0.157757	0.352541	0.343194	0.464036	1.54402	0.157757	1.27681	0.464036	21.9523
carboxylesterase NP	COG0596	Coenzyme transport and metabolism|General function prediction only	NP_388425.1	-	nap	-	592303	593205	903	CDS	6.6684	0.395167	0.145976	0.233892	0.351937	0.196676	0.30238	1.3151	0.233892	1.27627	0.30238	82.3595
putative phage protein	undefined	undefined	NP_388086.1	1	ybdN	-	224075	224932	858	CDS	2.06274	-0.0148162	0.972363	0.983361	0.3512	0.416729	0.540496	-1.01032	0.983361	1.27562	0.540496	3.54237
putative dioxygenase	COG0346	Secondary metabolites biosynthesis, transport and catabolism	NP_388430.1	-	ydfO	+	597114	598052	939	CDS	3.24723	0.881999	0.06343	0.11778	0.3502	0.469612	0.592086	1.84293	0.11778	1.27474	0.592086	5.83588
conserved hypothetical protein, phage SPbeta	undefined	undefined	NP_389977.1	1	yopC	-	2213536	2214864	1329	CDS	4.84458	0.10659	0.741651	0.814235	0.350188	0.280498	0.397227	1.07668	0.814235	1.27473	0.397227	26.8213
cysteine and O-acetyl serine efflux permease	COG0697	Carbohydrate transport and metabolism|Amino acid transport and metabolism|General function prediction only	NP_389758.1	yes	cyeA	+	2045929	2046807	879	CDS	2.77459	0.287309	0.401528	0.517426	0.349397	0.316282	0.435684	1.22036	0.517426	1.27403	0.435684	5.53638
putative regulator of flagella formation	undefined	undefined	NP_391424.1	-	yvyF	-	3640632	3641051	420	CDS	3.44465	0.1634	0.645041	0.736139	0.349287	0.327945	0.448142	1.11992	0.736139	1.27393	0.448142	9.98209
putative PLP-dependent transcriptional regulator	COG1167	Transcription|Amino acid transport and metabolism	NP_388238.1	-	ycxD	+	406131	407465	1335	CDS	3.8205	-0.941953	0.00879156	0.0220191	0.34917	0.318364	0.437963	-1.92113	0.0220191	1.27383	0.437963	15.6035
putative phosphodiesterase	COG3434	Signal transduction mechanisms			yuxH	-	3258037	3259266	1230	CDS	7.19519	0.464592	0.168605	0.260271	0.342675	0.310356	0.429539	1.37993	0.260271	1.26811	0.429539	111.873
transcriptional repressor	COG1733	Transcription	NP_389835.1	-	arxR	-	2127345	2127683	339	CDS	4.33585	0.495058	0.114346	0.192204	0.34264	0.280893	0.397472	1.40938	0.192204	1.26808	0.397472	16.1669
putative methyltransferase	COG2136	Translation, ribosomal structure and biogenesis	NP_390068.2	-	ypiP	-	2299406	2300179	774	CDS	6.35564	0.323132	0.484931	0.595456	0.342217	0.460096	0.583291	1.25104	0.595456	1.2677	0.583291	59.9733
negative regulator of the activity of sigma-M	undefined	undefined	NP_388832.1	1	yhdL	-	1028511	1029587	1077	CDS	9.30693	3.55571	1.00663e-19	6.45659e-18	0.342191	0.336552	0.458072	11.7591	6.45659e-18	1.26768	0.458072	138.621
conserved hypothetical protein	undefined	undefined	NP_391558.1	1	ywmB	-	3779293	3780033	741	CDS	9.96292	3.19323	2.45036e-19	1.45779e-17	0.342014	0.296957	0.414487	9.14655	1.45779e-17	1.26753	0.414487	233.466
response regulator	COG0745	Signal transduction mechanisms|Transcription	NP_390302.1	-	spo0A	-	2518023	2518826	804	CDS	7.32386	1.56153	9.10257e-07	6.83109e-06	0.340882	0.276543	0.393896	2.95167	6.83109e-06	1.26653	0.393896	85.9441
phenolic acid decarboxylase subunit BsdB	COG0163	Coenzyme transport and metabolism	NP_388245.1	1	bsdB	+	412540	413154	615	CDS	1.79474	0.622251	0.16769	0.259272	0.340667	0.473523	0.596078	1.53928	0.259272	1.26634	0.596078	2.30865
conserved hypothetical protein	COG2340	Function unknown	NP_389379.1	1	ylbC	+	1566379	1567419	1041	CDS	6.9876	1.73221	4.06775e-06	2.61316e-05	0.338078	0.358553	0.480528	3.32236	2.61316e-05	1.26407	0.480528	64.882
conserved hypothetical protein	COG3595	Function unknown	NP_391392.1	-	yvlB	-	3607325	3608422	1098	CDS	9.19526	-0.423311	0.198571	0.296089	0.338014	0.304263	0.422642	-1.341	0.296089	1.26402	0.422642	640.379
bifunctional riboflavin kinase FAD synthase	COG0196	Coenzyme transport and metabolism	NP_389549.1	-	ribC	+	1737834	1738784	951	CDS	7.88348	1.18758	7.91708e-05	0.000373559	0.337923	0.257252	0.372776	2.2777	0.000373559	1.26394	0.372776	129.7
putative transcriptional regulator (Lrp/AsnC family)	COG1522	Transcription	NP_388536.2	-	yezC	-	711456	711875	420	CDS	4.1805	-0.173499	0.621942	0.716752	0.337553	0.338139	0.459775	-1.12779	0.716752	1.26361	0.459775	16.0222
conserved hypothetical protein	COG1721	Function unknown	NP_388515.2	yes	yeaD	+	689146	690342	1197	CDS	6.52001	-0.823693	0.00818414	0.020752	0.335818	0.276814	0.394009	-1.76993	0.020752	1.26209	0.394009	94.5779
double-zinc aminopeptidase	COG2234	Posttranslational modification, protein turnover, chaperones	NP_391726.1	-	ywaD	+	3948555	3949922	1368	CDS	3.12502	3.28358	3.28602e-17	1.41991e-15	0.335297	0.485191	0.607461	9.73771	1.41991e-15	1.26164	0.607461	1.66363
sporulation-specific protein	undefined	undefined	NP_389061.1	yes	yjcA	+	1252177	1252533	357	CDS	1.38185	0.612401	0.185256	0.279999	0.334311	0.494052	0.615802	1.5288	0.279999	1.26077	0.615802	1.82552
biotin synthase	COG0502	Coenzyme transport and metabolism			bioB	-	3090482	3091489	1008	CDS	2.71813	0.501918	0.166367	0.257989	0.334209	0.374519	0.496364	1.4161	0.257989	1.26069	0.496364	4.19739
putative oxidoreductase (nitroreductase family)	COG0778	Energy production and conversion	NP_388729.1	-	yfhC	+	923587	924171	585	CDS	9.24456	-0.478863	0.10342	0.176304	0.333161	0.256542	0.372253	-1.39365	0.176304	1.25977	0.372253	596.78
ABC membrane transporter (ATP-binding protein) required for cytochrome bb' function	COG4987	Energy production and conversion|Posttranslational modification, protein turnover, chaperones	NP_391752.1	yes	cydD	-	3973364	3975091	1728	CDS	8.28835	-2.85205	1.14308e-05	6.51713e-05	0.33296	0.582917	0.694098	-7.22027	6.51713e-05	1.25959	0.694098	459.541
putative permease	COG5578	Function unknown	NP_388575.1	yes	yesL	+	758093	758722	630	CDS	2.7083	-2.75255	5.57863e-06	3.45926e-05	0.330846	0.531523	0.64899	-6.73907	3.45926e-05	1.25775	0.64899	7.11474
putative methyl-accepting protein	COG1511	Function unknown	NP_388897.1	yes	yhgE	+	1090401	1092728	2328	CDS	7.51315	-0.133169	0.660954	0.749571	0.330599	0.276754	0.394009	-1.0967	0.749571	1.25754	0.394009	176.56
2-methylcitrate dehydratase	COG2079	Carbohydrate transport and metabolism	NP_390293.2	-	mmgE	-	2508221	2509639	1419	CDS	3.61781	0.753483	0.0164898	0.0382001	0.330451	0.309962	0.429138	1.68586	0.0382001	1.25741	0.429138	8.11482
putative enzyme	undefined	undefined	NP_388071.1	1	ybcM	+	213155	213469	315	CDS	0.438216	1.79713	0.00553	0.014955	0.329777	0.676375	0.771983	3.47529	0.014955	1.25682	0.771983	0.514015
Holliday junction DNA helicase	COG0632	Replication, recombination and repair	NP_390652.1	-	ruvA	-	2836165	2836770	606	CDS	5.72877	-0.244662	0.440004	0.553885	0.326995	0.301484	0.41938	-1.18481	0.553885	1.2544	0.41938	50.9867
2,3-diketo-5-methylthiopentyl-1-phosphate enolase (DK-MTP-1-P enolase)	COG1850	Carbohydrate transport and metabolism			mtnW	+	1427061	1428278	1218	CDS	4.40989	-0.782033	0.0728817	0.132205	0.3269	0.449163	0.571903	-1.71955	0.132205	1.25432	0.571903	27.0416
putative integral inner membrane protein	COG1714	Function unknown	NP_388221.1	yes	yckC	+	369236	369691	456	CDS	5.6776	1.49603	1.7024e-07	1.51173e-06	0.326694	0.257831	0.373464	2.82066	1.51173e-06	1.25414	0.373464	22.7322
putative ABC transporter (permease)	COG0395	Carbohydrate transport and metabolism	NP_388593.1	yes	lplC	+	782062	782949	888	CDS	1.19219	-1.15421	0.0311928	0.0655977	0.326486	0.501918	0.622845	-2.22562	0.0655977	1.25396	0.622845	2.33924
two-component response regulator	COG2204	Signal transduction mechanisms	NP_391594.1	-	spo0F	-	3809550	3809924	375	CDS	4.18907	-0.460087	0.143686	0.231126	0.325	0.296276	0.413678	-1.37562	0.231126	1.25266	0.413678	16.9523
putative phage replication protein	undefined	undefined	NP_388500.1	yes	ydjG	+	671994	673019	1026	CDS	6.59731	-3.84001	4.84772e-18	2.26135e-16	0.323482	0.407834	0.531648	-14.3205	2.26135e-16	1.25135	0.531648	149.324
putative hydrolase	COG1011	Coenzyme transport and metabolism	NP_388614.1	-	yfnB	-	804657	805364	708	CDS	5.07663	-0.0535814	0.856651	0.90307	0.323133	0.277142	0.394339	-1.03784	0.90307	1.25104	0.394339	30.1761
conserved hypothetical protein	undefined	undefined	NP_388101.1	yes	ybfF	-	238644	239555	912	CDS	4.30082	-2.59641	9.39108e-09	1.05618e-07	0.321997	0.437344	0.560855	-6.04782	1.05618e-07	1.25006	0.560855	28.828
manganese transporter	COG1914	Inorganic ion transport and metabolism	NP_388317.1	yes	mntH	-	491147	492424	1278	CDS	10.0839	-0.45778	0.177247	0.270483	0.321298	0.343068	0.464036	-1.37343	0.270483	1.24945	0.464036	1031.48
putative 3-oxoacyl-acyl-carrier protein reductase	COG1028	Lipid transport and metabolism|Secondary metabolites biosynthesis, transport and catabolism|General function prediction only			yusR	-	3377019	3377408	390	CDS	1.31322	0.461639	0.442989	0.556787	0.321119	0.613379	0.719612	1.37711	0.556787	1.2493	0.719612	1.5166
thiaminase II	COG0819	Coenzyme transport and metabolism	NP_389047.1	1	tenA	+	1242449	1243159	711	CDS	4.56056	2.1276	5.51608e-11	9.13044e-10	0.318944	0.346115	0.467056	4.36991	9.13044e-10	1.24742	0.467056	8.32185
primase of polyglycerolphosphate lipoteichoic acid (LTA) synthesis	COG1368	Cell wall/membrane/envelope biogenesis	NP_391216.1	yes	ltaSP	+	3422354	3424207	1854	CDS	7.68967	0.0471496	0.874911	0.9155	0.318611	0.288015	0.405037	1.03322	0.9155	1.24713	0.405037	187.268
conserved hypothetical protein	undefined	undefined			ytzL	+	3141900	3142058	159	CDS	0.938515	0.111132	0.840914	0.891417	0.31821	0.571061	0.684439	1.08008	0.891417	1.24678	0.684439	1.32209
factor involved in motility	COG5521	Carbohydrate transport and metabolism	NP_390383.2	yes	yqgB	+	2586813	2587580	768	CDS	5.20863	-0.76596	0.0153803	0.0360573	0.3177	0.309429	0.428544	-1.7005	0.0360573	1.24634	0.428544	42.9794
putative capsid component, phage SPbeta	COG3420	Inorganic ion transport and metabolism	NP_389927.1	-	yorA	-	2188204	2189964	1761	CDS	4.01502	0.810173	0.205223	0.303473	0.317538	0.61978	0.725877	1.75342	0.303473	1.2462	0.725877	10.1053
conserved hypothetical protein	COG0217	Transcription|Translation, ribosomal structure and biogenesis	NP_388566.3	-	yeeI	+	752412	753131	720	CDS	8.20971	-0.467169	0.131652	0.216551	0.317396	0.30499	0.423397	-1.38239	0.216551	1.24608	0.423397	283.153
conserved hypothetical protein	COG1956	Defense mechanisms|Signal transduction mechanisms	NP_390842.2	-	ytsP	+	3033167	3033658	492	CDS	8.43009	1.9669	1.74565e-11	3.14294e-10	0.315375	0.267074	0.383604	3.90927	3.14294e-10	1.24433	0.383604	141.269
putative transcriptional regulator	COG1309	Transcription	NP_391864.1	-	yxbF	-	4092695	4093837	1143	CDS	6.58546	1.36742	2.18172e-06	1.48523e-05	0.314517	0.274082	0.391477	2.58009	1.48523e-05	1.24359	0.391477	49.731
conserved hypothetical protein, PBSX phage	undefined	undefined	NP_389129.1	-	yjqA	-	1318528	1318905	378	CDS	6.19224	-0.459159	0.181899	0.276169	0.313948	0.360208	0.481647	-1.37474	0.276169	1.2431	0.481647	75.4512
RNA polymerase sporulation-specific sigma-K factor precursor (Sigma-27) (C-terminal fragment)	undefined	undefined			spoIIIC	+	2701338	2701754	417	CDS	2.0189	0.765768	0.108595	0.184207	0.313485	0.526614	0.644833	1.70027	0.184207	1.24271	0.644833	2.71225
4-(cytidine 5'-diphospho)-2-C-methyl-D-erythritol kinase	COG1947	Lipid transport and metabolism	NP_387927.1	-	ispE	+	53516	54385	870	CDS	7.4177	-0.873621	0.00427517	0.0120285	0.313318	0.301612	0.419416	-1.83226	0.0120285	1.24256	0.419416	206.789
conserved hypothetical protein	undefined	undefined	NP_388655.2	-	yflB	+	844253	844645	393	CDS	3.1871	0.418616	0.273908	0.382316	0.311964	0.42321	0.546325	1.33664	0.382316	1.2414	0.546325	7.23516
conserved hypothetical protein	COG2318	Function unknown	YP_054576.1	-	yizA	-	1159211	1159690	480	CDS	2.95147	1.89371	5.56786e-08	5.49425e-07	0.311677	0.427083	0.550102	3.71588	5.49425e-07	1.24115	0.550102	3.15965
thiol-disulfide isomerase	COG0526	Posttranslational modification, protein turnover, chaperones	NP_389267.1	1	stoA	+	1450638	1451135	498	CDS	4.64372	-0.142414	0.621006	0.716075	0.311085	0.280687	0.397317	-1.10375	0.716075	1.24064	0.397317	24.9095
putative lipoprotein	undefined	undefined	NP_389752.2	1	yozF	-	2041330	2041827	498	CDS	0.343813	1.44688	0.0384481	0.0777485	0.31078	0.701478	0.791656	2.72618	0.0777485	1.24038	0.791656	0.451672
putative RNA binding protein	COG0328	Replication, recombination and repair	NP_390082.1	-	ypdQ	+	2310419	2310817	399	CDS	4.04688	-0.560434	0.049533	0.0960024	0.30967	0.270035	0.38718	-1.47471	0.0960024	1.23942	0.38718	16.9069
putative glutamine-dependent sugar transaminase	COG0399	Cell wall/membrane/envelope biogenesis	NP_391668.1	-	spsC	-	3889732	3890901	1170	CDS	1.21128	-0.453796	0.426342	0.542005	0.308903	0.5755	0.688553	-1.36964	0.542005	1.23877	0.688553	1.91447
conserved hypothetical protein	undefined	undefined	NP_391301.1	-	yvfG	+	3513887	3514105	219	CDS	6.95251	-0.949841	0.0034996	0.0101669	0.308324	0.338265	0.459794	-1.93166	0.0101669	1.23827	0.459794	147.859
nucleotide exchange factor for DnaK activity	COG0576	Posttranslational modification, protein turnover, chaperones	NP_390426.1	-	grpE	-	2627971	2628534	564	CDS	9.05532	0.0343083	0.918022	0.944062	0.307312	0.357031	0.478802	1.02407	0.944062	1.2374	0.478802	503.469
putative phage protein	undefined	undefined	NP_389630.1	-	ynzF	+	1880623	1880967	345	CDS	2.40711	1.52107	0.00310986	0.00919931	0.306573	0.570821	0.684365	2.87003	0.00919931	1.23677	0.684365	2.76459
component of the acetoin degradation regulation pathway	COG0517	Signal transduction mechanisms			acuB	+	3040751	3041395	645	CDS	5.01154	0.24321	0.439084	0.552896	0.306427	0.333145	0.454188	1.18362	0.552896	1.23664	0.454188	23.5929
methyl-accepting chemotaxis protein	COG0840	Cell motility|Signal transduction mechanisms	NP_388226.2	yes	tlpC	-	372771	374492	1722	CDS	1.64612	-0.670765	0.161998	0.252802	0.306096	0.505266	0.625487	-1.59192	0.252802	1.23636	0.625487	2.82781
conserved hypothetical protein	COG4864	Function unknown	NP_390416.1	yes	yqfA	-	2617449	2618444	996	CDS	8.52953	-2.65091	5.12118e-11	8.54571e-10	0.305294	0.420775	0.544196	-6.28065	8.54571e-10	1.23567	0.544196	522.823
rhamnogalacturonan permease	COG1175	Carbohydrate transport and metabolism	NP_388579.1	yes	rhgP	+	762942	763871	930	CDS	1.40616	0.183472	0.736995	0.811991	0.305145	0.583648	0.694457	1.13561	0.811991	1.23554	0.694457	1.83183
two-component sensor histidine kinase [LytT]	COG3275	Signal transduction mechanisms	NP_390771.1	yes	lytS	-	2956486	2958267	1782	CDS	6.09541	0.391093	0.161272	0.25191	0.304146	0.278086	0.395271	1.31139	0.25191	1.23469	0.395271	60.8346
lesion bypass phage DNA polymerase	COG0389	Replication, recombination and repair	NP_390033.2	1	uvrX	-	2270407	2271657	1251	CDS	0.4026	1.75417	0.0096322	0.0238606	0.302361	0.70854	0.796305	3.37332	0.0238606	1.23316	0.796305	0.513721
putative RNA-binding protein	COG2606	Translation, ribosomal structure and biogenesis	NP_391628.1	-	ywhH	+	3847348	3847821	474	CDS	2.8346	-1.15392	0.00141702	0.00474459	0.302242	0.375972	0.497379	-2.22517	0.00474459	1.23306	0.497379	8.70603
Na+ ABC efflux transporter (permease)	COG1668	Energy production and conversion|Inorganic ion transport and metabolism	NP_388158.1	yes	natB	+	297170	298330	1161	CDS	3.80655	-3.10589	2.25498e-19	1.36128e-17	0.301756	0.29147	0.408776	-8.60925	1.36128e-17	1.23264	0.408776	19.7436
conserved hypothetical protein	COG5577	Cell wall/membrane/envelope biogenesis	NP_388799.1	-	yhcQ	-	990612	991265	654	CDS	2.24372	1.62604	4.3585e-05	0.000221705	0.301361	0.505691	0.625825	3.08665	0.000221705	1.23231	0.625825	2.0784
conserved hypothetical protein	COG2200	Signal transduction mechanisms	NP_389292.1	-	ykuI	+	1482248	1483471	1224	CDS	6.31129	-0.816117	0.00519756	0.0141673	0.300594	0.298843	0.41613	-1.76066	0.0141673	1.23165	0.41613	95.7827
cytochrome bb' ubiquinol oxidase (subunit II)	COG1294	Energy production and conversion	NP_391754.1	yes	cydB	-	3976791	3977807	1017	CDS	8.44315	-1.83673	0.00500765	0.0137134	0.300447	0.635845	0.739208	-3.57199	0.0137134	1.23153	0.739208	470.625
putative 16S pseudouridylate synthase	COG1187	Translation, ribosomal structure and biogenesis			ytzG	-	3072743	3073462	720	CDS	6.25515	0.209946	0.443246	0.556941	0.300035	0.274794	0.392221	1.15664	0.556941	1.23117	0.392221	63.6236
S-adenosylmethionine riboswitch	undefined	undefined			mswH	-	3364397	3364503	107	No_CDS	5.02548	-0.608931	0.0502765	0.0972598	0.299695	0.33114	0.451605	-1.52513	0.0972598	1.23088	0.451605	36.9643
spore DNA translocase	COG1674	Cell cycle control, cell division, chromosome partitioning	NP_389562.2	yes	spoIIIE	+	1752278	1754641	2364	CDS	7.65348	0.722499	0.0375268	0.076299	0.29929	0.387644	0.510516	1.65004	0.076299	1.23054	0.510516	165.111
putative transcriptional regulator (TetR/AcrR family)	COG1309	Transcription	NP_388267.2	-	ycnC	-	437474	438352	879	CDS	6.24541	-1.56968	1.23241e-06	8.94169e-06	0.298935	0.341421	0.462552	-2.96839	8.94169e-06	1.23024	0.462552	100.456
Hfq RNA chaperone	COG1923	Signal transduction mechanisms	NP_389616.1	-	hfq	+	1867373	1867594	222	CDS	3.95598	-0.411241	0.200196	0.297971	0.298569	0.347934	0.469054	-1.32983	0.297971	1.22992	0.469054	13.8665
putative integral inner membrane protein	undefined	undefined	NP_391538.1	yes	ywnG	+	3761182	3761700	519	CDS	7.33035	0.510668	0.0606065	0.113654	0.298483	0.273399	0.39091	1.42471	0.113654	1.22985	0.39091	128.293
transcriptional repressor of carbon supply (LacI family)	COG1609	Transcription	NP_391967.1	-	ccpB	-	4196786	4197721	936	CDS	2.34268	0.0188894	0.977129	0.985774	0.297384	0.652693	0.75198	1.01318	0.985774	1.22891	0.75198	4.08609
putative ABC transporter (ATP-binding protein)	COG1131	Defense mechanisms			ythP	-	3071400	3072110	711	CDS	6.91163	-2.65644	7.25483e-10	1.01296e-08	0.297155	0.461615	0.584367	-6.30476	1.01296e-08	1.22872	0.584367	172.035
hypothetical protein	undefined	undefined	NP_389806.1	-	yocL	-	2097692	2098024	333	CDS	2.75978	-0.689173	0.0910784	0.158624	0.297091	0.455958	0.579117	-1.61236	0.158624	1.22866	0.579117	7.61244
sporulation specific penicillin-binding protein	COG0744	Cell wall/membrane/envelope biogenesis	NP_391631.2	1	pbpG	+	3849818	3851893	2076	CDS	2.71543	1.64843	7.83654e-06	4.73073e-05	0.295888	0.466643	0.588863	3.13492	4.73073e-05	1.22764	0.588863	3.16995
dynamin-like GTPase	COG0699	Replication, recombination and repair	NP_390085.1	-	dynA	-	2312529	2316110	3582	CDS	6.34176	0.245063	0.506493	0.614855	0.295587	0.423819	0.546928	1.18514	0.614855	1.22738	0.546928	76.7837
menaquinol:cytochrome c oxidoreductase (cytochrome b subunit)	COG1290	Energy production and conversion	NP_390136.1	yes	qcrB	-	2363913	2364587	675	CDS	6.18109	-0.94227	0.000860815	0.0030674	0.294379	0.291221	0.408617	-1.92155	0.0030674	1.22636	0.408617	74.1996
conserved hypothetical protein	COG4224	Function unknown	NP_389671.1	-	ynzC	+	1919459	1919692	234	CDS	5.25088	1.92185	9.12965e-07	6.8389e-06	0.294082	0.446647	0.569406	3.78908	6.8389e-06	1.2261	0.569406	19.9061
small acid-soluble spore protein	undefined	undefined	YP_054585.1	-	sspM	+	2339670	2339774	105	CDS	0.434063	1.96519	0.0191225	0.0435615	0.293134	0.755968	0.831079	3.90464	0.0435615	1.2253	0.831079	0.424768
conserved hypothetical protein	undefined	undefined	NP_388674.1	1	yfkD	+	866331	867125	795	CDS	6.97084	0.167574	0.779668	0.844246	0.290225	0.628342	0.732352	1.12317	0.844246	1.22283	0.732352	94.3963
ribosomal protein L9	COG0359	Translation, ribosomal structure and biogenesis	NP_391930.1	-	rplI	-	4163197	4163646	450	CDS	8.54156	0.414185	0.149893	0.237846	0.290105	0.313242	0.432804	1.33255	0.237846	1.22273	0.432804	301.117
putative replication initiation protein	undefined	undefined	NP_391508.2	-	ywqB	+	3733852	3735462	1611	CDS	5.67729	0.40061	0.168653	0.260271	0.289881	0.321254	0.440785	1.32007	0.260271	1.22254	0.440785	47.15
integral membrane protein possibly involved in chromosome condensation	COG0239	Cell cycle control, cell division, chromosome partitioning|Inorganic ion transport and metabolism	NP_388842.1	yes	yhdV	-	1037306	1037701	396	CDS	5.04723	0.260723	0.442662	0.556547	0.289636	0.395963	0.519022	1.19808	0.556547	1.22233	0.519022	28.983
spore coat-associated protein	COG2334	Signal transduction mechanisms			yutH	-	3316330	3317349	1020	CDS	3.09987	-0.371106	0.473336	0.584902	0.289361	0.573656	0.686949	-1.29334	0.584902	1.2221	0.686949	7.92457
two-component sensor histidine kinase [GlnL] for glutamine degradation	COG4191	Signal transduction mechanisms	NP_388126.2	yes	glnJ	+	265476	266708	1233	CDS	4.55613	-0.102796	0.720524	0.799621	0.286932	0.319267	0.438912	-1.07385	0.799621	1.22004	0.438912	20.6366
putative transcriptional regulator	COG1396	Transcription	NP_387961.1	-	yazB	+	87401	87610	210	CDS	6.59093	1.97965	1.76708e-10	2.76865e-09	0.286755	0.346042	0.467056	3.94397	2.76865e-09	1.21989	0.467056	45.5458
small acid-soluble spore protein (alpha/beta-type SASP)	undefined	undefined	NP_387926.1	-	sspF	+	53183	53368	186	CDS	4.89894	1.10703	0.146967	0.234839	0.285643	0.707263	0.795211	2.15402	0.234839	1.21895	0.795211	10.3101
ABC membrane transporter (ATP-binding protein) required for cytochrome bb' function	COG4988	Energy production and conversion|Posttranslational modification, protein turnover, chaperones	NP_391753.1	yes	cydC	-	3975088	3976791	1704	CDS	8.96294	-2.36208	0.00165919	0.00541844	0.285259	0.689831	0.781389	-5.1411	0.00541844	1.21863	0.781389	718.032
conserved hypothetical protein	undefined	undefined	NP_389635.1	-	ynaE	+	1884238	1884879	642	CDS	2.86155	-0.922417	0.0109605	0.0266862	0.285114	0.412565	0.536452	-1.89529	0.0266862	1.21851	0.536452	8.73603
ABC transporter (ATP-binding protein), efflux of cationic peptides	COG1136	Cell wall/membrane/envelope biogenesis	NP_391843.2	-	yxdL	-	4070393	4071166	774	CDS	2.12634	-1.12802	0.00440566	0.0123281	0.284157	0.436595	0.560245	-2.18559	0.0123281	1.2177	0.560245	5.12132
glucarate transporter	COG2271	Carbohydrate transport and metabolism	NP_388130.2	yes	gudP	+	270396	271763	1368	CDS	3.11924	-1.85459	1.13277e-07	1.05204e-06	0.283505	0.368493	0.490488	-3.61648	1.05204e-06	1.21715	0.490488	11.5296
conserved hypothetical protein	undefined	undefined	NP_390138.1	-	ypiF	-	2365235	2365681	447	CDS	3.27105	-0.772139	0.0260651	0.0566124	0.283135	0.398921	0.521852	-1.7078	0.0566124	1.21684	0.521852	8.39197
putative inner integral membrane protein	undefined	undefined	NP_388141.1	yes	ycbP	-	281769	282155	387	CDS	7.33872	-0.8149	0.156973	0.247171	0.282226	0.621867	0.72749	-1.75918	0.247171	1.21607	0.72749	171.148
conserved hypothetical protein	COG1873	General function prediction only	NP_389419.1	-	ylmC	+	1608919	1609164	246	CDS	2.86922	3.03172	4.79513e-14	1.33e-12	0.282054	0.569475	0.683567	8.17785	1.33e-12	1.21592	0.683567	1.64305
putative integral inner membrane orphan protein	undefined	undefined	NP_388786.1	yes	yhcE	+	980473	981234	762	CDS	3.94786	-0.249761	0.423684	0.539629	0.281848	0.365528	0.487331	-1.18901	0.539629	1.21575	0.487331	15.8549
membrane endopeptidase	COG0457	General function prediction only	NP_390367.2	yes	glpG	-	2571907	2573430	1524	CDS	5.8689	-0.135825	0.645481	0.736233	0.280248	0.342733	0.464024	-1.09872	0.736233	1.2144	0.464024	55.1621
putative DNA recombinase	COG1961	Replication, recombination and repair	NP_390049.1	-	yokA	+	2284771	2286408	1638	CDS	4.17627	0.560411	0.251551	0.357555	0.278882	0.570195	0.684001	1.47469	0.357555	1.21325	0.684001	13.8119
putative oligo-carbohydrate hydrolase	COG0366	Carbohydrate transport and metabolism	NP_388166.1	-	ycdG	+	306459	308144	1686	CDS	7.16898	-0.351245	0.536287	0.641809	0.276298	0.626422	0.730737	-1.27566	0.641809	1.21108	0.730737	125.937
putative transcriptional regulator	COG1309	Transcription	NP_391701.2	-	ywcC	-	3922292	3922963	672	CDS	3.89813	-0.402146	0.170506	0.262253	0.275673	0.342937	0.464036	-1.32147	0.262253	1.21056	0.464036	15.2103
maltodextrin ABC transporter (permease)	COG3833	Carbohydrate transport and metabolism	NP_391339.1	yes	mdxG	-	3552369	3553205	837	CDS	1.62596	0.427341	0.350378	0.465018	0.275599	0.565643	0.681127	1.34475	0.465018	1.2105	0.681127	2.17338
transcriptional regulator (LacI family)	COG1609	Transcription	NP_391472.1	-	rbsR	+	3701411	3702391	981	CDS	8.92337	-0.303816	0.514664	0.622663	0.275118	0.555121	0.672006	-1.23441	0.622663	1.21009	0.672006	257.218
class III heat-shock ATP-dependent LonA protease	COG0466	Posttranslational modification, protein turnover, chaperones	NP_390698.1	-	lonA	-	2880466	2882790	2325	CDS	9.02259	0.858494	0.00303683	0.00904	0.274431	0.340889	0.462007	1.81314	0.00904	1.20952	0.462007	351.929
putative cell wall oligopeptide ABC transporter (ATP binding protein)	COG4608	Amino acid transport and metabolism	NP_389183.2	-	ykfD	+	1368844	1369833	990	CDS	3.03188	-0.0408958	0.903556	0.934046	0.273958	0.419497	0.543228	-1.02875	0.934046	1.20912	0.543228	8.05189
putative degradation enzyme (oxygenase)	COG2329	Coenzyme transport and metabolism	NP_390249.1	-	yqjZ	-	2463217	2463561	345	CDS	3.12112	0.00179383	0.995916	0.998079	0.273619	0.439876	0.563222	1.00124	0.998079	1.20884	0.563222	8.2967
ATP-binding tunicamycin resistance protein	undefined	undefined	NP_388196.2	-	tmrB	-	339156	339749	594	CDS	4.90669	0.469787	0.169231	0.261065	0.272857	0.430838	0.554243	1.3849	0.261065	1.2082	0.554243	17.6128
antagonist of RsbT	COG1366	Signal transduction mechanisms	NP_388349.1	1	rsbS	+	520237	520602	366	CDS	5.97861	0.705327	0.0110437	0.0268729	0.272844	0.328302	0.448181	1.63051	0.0268729	1.20819	0.448181	45.7632
L-alanine dehydrogenase	COG0686	Amino acid transport and metabolism			ald	+	3278325	3279461	1137	CDS	8.36099	0.345316	0.391713	0.50709	0.270076	0.503004	0.623739	1.27043	0.50709	1.20587	0.623739	283.062
tRNA (adenine(22)-N(1))-methyltransferase	COG2384	Translation, ribosomal structure and biogenesis	NP_390397.1	-	trmK	-	2598616	2599266	651	CDS	7.30839	0.159859	0.627846	0.721732	0.269021	0.415341	0.539208	1.11718	0.721732	1.20499	0.539208	134.71
putative hydrolase	undefined	undefined	NP_388887.1	1	ecsC	+	1079422	1080132	711	CDS	6.85366	0.34038	0.251353	0.357397	0.268187	0.367095	0.488957	1.26609	0.357397	1.20429	0.488957	95.1901
response regulator aspartate phosphatase	COG0457	General function prediction only	NP_388164.1	-	rapJ	+	304430	305551	1122	CDS	6.28694	-0.792593	0.00592475	0.015834	0.26711	0.349225	0.470331	-1.73218	0.015834	1.20339	0.470331	80.8875
conserved hypothetical protein	undefined	undefined	YP_003097770.1	1	yszA	+	2869754	2869945	192	CDS	0.486955	0.413354	0.519478	0.626456	0.266833	0.693456	0.785062	1.33178	0.626456	1.20316	0.785062	0.781168
switch protein/serine-threonine kinase, controls the activity of the piezosome (stressosome)	COG2172	Signal transduction mechanisms	NP_388350.1	-	rsbT	+	520606	521007	402	CDS	6.38785	0.836749	0.00538719	0.0146453	0.265564	0.377495	0.499072	1.78602	0.0146453	1.20211	0.499072	58.7776
putative transcriptional regulator (MarR family)	COG1846	Transcription	NP_388445.1	-	ydgG	+	608933	609391	459	CDS	1.7183	-1.20455	0.0084976	0.0214135	0.265249	0.525833	0.644342	-2.30466	0.0214135	1.20184	0.644342	3.65617
penicillin-binding protein 2C required for spore germination	COG0744	Cell wall/membrane/envelope biogenesis	NP_388892.2	1	pbpF	+	1083851	1085995	2145	CDS	6.07667	0.141598	0.709162	0.791417	0.264603	0.486538	0.608357	1.10313	0.791417	1.20131	0.608357	62.298
nitrite extrusion permease	COG2223	Inorganic ion transport and metabolism	NP_391613.2	yes	narK	-	3832327	3833514	1188	CDS	3.70341	-1.0788	0.0503773	0.0973667	0.263319	0.625666	0.730334	-2.11227	0.0973667	1.20024	0.730334	13.2988
putative ABC transporter (ATP-binding protein)	COG1126	Amino acid transport and metabolism	NP_391827.1	-	yxeO	-	4058029	4058778	750	CDS	2.56315	-1.60823	0.000227841	0.000947608	0.262315	0.520389	0.639197	-3.04877	0.000947608	1.1994	0.639197	8.39021
putative transcriptional regulator	COG2508	Transcription	NP_391761.1	-	yxkF	-	3985351	3986244	894	CDS	4.01716	-0.953655	0.0043844	0.0122937	0.261879	0.422521	0.54602	-1.93677	0.0122937	1.19904	0.54602	19.8985
two-component response regulator [YvfT]	COG2197	Signal transduction mechanisms|Transcription	NP_391286.1	-	yvfU	-	3495876	3496478	603	CDS	3.86455	-0.635365	0.0405419	0.08111	0.258847	0.39719	0.52025	-1.55333	0.08111	1.19652	0.52025	17.0934
putative component of the DNA transport apparatus	COG1040	General function prediction only	NP_391425.1	-	comFC	-	3641125	3641814	690	CDS	3.20097	-0.249958	0.434467	0.548428	0.256816	0.420516	0.544033	-1.18917	0.548428	1.19484	0.544033	9.60188
putative regulator (stress mediated)	COG1983	Transcription|Signal transduction mechanisms	NP_391391.1	1	yvlC	-	3607123	3607320	198	CDS	4.17966	-0.403601	0.185195	0.279999	0.255999	0.398386	0.521484	-1.32281	0.279999	1.19416	0.521484	18.9715
putative stress adaptation transporter	COG0861	Inorganic ion transport and metabolism	NP_388174.1	yes	yceF	+	314025	314798	774	CDS	9.68567	0.0635588	0.838964	0.89013	0.255178	0.414944	0.538863	1.04504	0.89013	1.19348	0.538863	768.892
cytochrome caa3 oxidase (subunit II)	COG1622	Energy production and conversion	NP_389372.1	yes	ctaC	+	1560466	1561536	1071	CDS	5.17558	-1.31612	3.70697e-06	2.40018e-05	0.255123	0.35511	0.477005	-2.48996	2.40018e-05	1.19344	0.477005	47.623
transcriptional activator of the Mal operon	COG1737	Transcription	NP_388700.1	-	malR	+	891436	892200	765	CDS	4.12922	0.346508	0.324818	0.436458	0.255041	0.474413	0.596833	1.27148	0.436458	1.19337	0.596833	12.8202
flavin mononucleotide riboswitch	undefined	undefined			fswB	-	2410581	2410888	308	No_CDS	5.79051	1.93805	6.22396e-10	8.77985e-09	0.255006	0.412823	0.536617	3.83188	8.77985e-09	1.19334	0.536617	26.5608
putative mechanosensitive ion channel	COG0668	Cell wall/membrane/envelope biogenesis	NP_388675.1	yes	yfkC	-	867164	868006	843	CDS	8.29231	1.7261	1.3202e-07	1.20969e-06	0.2549	0.425547	0.548812	3.30833	1.20969e-06	1.19325	0.548812	130.159
putative hydrolase	COG0491	General function prediction only	NP_389607.2	-	ymaE	-	1860449	1861273	825	CDS	2.17575	-0.507359	0.217769	0.317902	0.254339	0.527206	0.644911	-1.42145	0.317902	1.19279	0.644911	4.70684
uroporphyrinogen III decarboxylase	COG0407	Coenzyme transport and metabolism	NP_388893.1	-	hemE	+	1086117	1087178	1062	CDS	7.44707	-0.444882	0.11679	0.195126	0.253379	0.370794	0.493231	-1.3612	0.195126	1.192	0.493231	199.472
phosphate ABC transporter (ATP-binding protein)	COG1117	Inorganic ion transport and metabolism	NP_390374.1	-	pstBB	-	2577210	2577992	783	CDS	0.977773	2.07664	0.00311264	0.00919931	0.253134	0.758491	0.83363	4.21823	0.00919931	1.19179	0.83363	0.582383
putative ribosomal RNA methyltransferase	COG0500	Secondary metabolites biosynthesis, transport and catabolism|General function prediction only	NP_391780.1	-	yxjB	-	4004288	4005136	849	CDS	8.97264	4.27499	1.27787e-33	5.24567e-31	0.252313	0.423219	0.546325	19.3598	5.24567e-31	1.19111	0.546325	63.5715
conserved hypothetical protein	undefined	undefined	NP_389749.1	1	yoaO	-	2038902	2039390	489	CDS	1.75297	0.156466	0.733328	0.809441	0.251749	0.590972	0.700531	1.11455	0.809441	1.19065	0.700531	2.43024
exodeoxyribonuclease VII (large subunit)	COG1570	Replication, recombination and repair	NP_390310.2	-	xseA	-	2526920	2528266	1347	CDS	6.27843	0.145274	0.670268	0.757141	0.251624	0.461657	0.584367	1.10594	0.757141	1.19055	0.584367	79.1063
molecular chaperone lipoprotein	COG0760	Posttranslational modification, protein turnover, chaperones	NP_388876.1	-	prsA	-	1070364	1071242	879	CDS	8.67733	-0.169597	0.669156	0.756718	0.251018	0.52724	0.644911	-1.12474	0.756718	1.19005	0.644911	418.334
tRNA-Leu	undefined	undefined			trnS-Leu2	+	529336	529422	87	tRNA	5.40372	-1.61326	3.49142e-06	2.27136e-05	0.249168	0.458349	0.581567	-3.05942	2.27136e-05	1.18852	0.581567	61.5432
putative Fe-S oxidoreductase	COG1242	General function prediction only			ytqA	+	3119999	3120967	969	CDS	6.4412	-0.217324	0.407228	0.523052	0.248631	0.343136	0.464036	-1.16258	0.523052	1.18808	0.464036	91.221
spore autolysin (stage II sporulation)	undefined	undefined	NP_390431.1	1	spoIIP	-	2633237	2634442	1206	CDS	1.81331	0.738789	0.169917	0.261533	0.248072	0.659857	0.757576	1.66877	0.261533	1.18762	0.757576	1.83154
putative dioxygenase, cupin family	COG0662	Carbohydrate transport and metabolism	NP_390533.1	-	yrkC	-	2714933	2715493	561	CDS	4.0523	1.01846	0.000657949	0.00242667	0.247959	0.421521	0.54499	2.02576	0.00242667	1.18753	0.54499	11.8788
tRNA-Tyr	undefined	undefined			trnD-Tyr	+	952307	952391	85	tRNA	1.33467	-1.42554	0.0124993	0.0300057	0.247433	0.63776	0.740387	-2.68614	0.0300057	1.18709	0.740387	3.252
co-factor of molecular chaperone	COG0484	Posttranslational modification, protein turnover, chaperones	NP_390424.2	-	dnaJ	-	2624785	2625912	1128	CDS	8.06486	0.0241001	0.938747	0.959312	0.247409	0.430605	0.554117	1.01685	0.959312	1.18707	0.554117	273.943
conserved hypothetical protein	COG4848	Function unknown			ytpQ	-	3053364	3054173	810	CDS	8.14279	-0.195049	0.484726	0.595392	0.247377	0.37571	0.497379	-1.14476	0.595392	1.18705	0.497379	276.113
putative integral inner membrane protein	COG2839	Function unknown	NP_390382.1	yes	yqgC	-	2586221	2586703	483	CDS	6.68592	-0.461598	0.256349	0.363619	0.247366	0.542218	0.659107	-1.37707	0.363619	1.18704	0.659107	114.712
putative cation efflux system	COG0053	Inorganic ion transport and metabolism	NP_388335.1	yes	ydbO	+	506866	507738	873	CDS	6.99952	2.46439	1.13717e-12	2.53701e-11	0.246449	0.460485	0.583603	5.51894	2.53701e-11	1.18628	0.583603	45.799
putative membrane phosphatase	COG0586	Function unknown	NP_388110.1	yes	ybfM	+	248268	248756	489	CDS	6.51873	0.181944	0.518893	0.626303	0.245944	0.384714	0.506983	1.13441	0.626303	1.18587	0.506983	81.0179
putative NTP pyrophosphohydrolase	COG0494	Defense mechanisms	NP_388314.1	-	mutT	+	488314	488763	450	CDS	1.66962	-0.0540727	0.901044	0.933159	0.243977	0.576578	0.688996	-1.03819	0.933159	1.18425	0.688996	2.3038
conserved hypothetical protein	COG0432	Coenzyme transport and metabolism			yugU	-	3213854	3214252	399	CDS	4.62173	0.16138	0.758421	0.825595	0.243074	0.644193	0.745545	1.11836	0.825595	1.18351	0.745545	21.2164
conserved hypothetical protein	undefined	undefined			ywzF	-	3769626	3769808	183	CDS	0.607884	-0.954829	0.149244	0.23746	0.241307	0.69452	0.78605	-1.93835	0.23746	1.18206	0.78605	1.52087
menaquinone methyltransferase	COG2226	Coenzyme transport and metabolism	NP_390156.1	-	menH	-	2382907	2383608	702	CDS	8.04664	-0.786364	0.0075865	0.0194885	0.239971	0.412194	0.536139	-1.72472	0.0194885	1.18097	0.536139	284.219
putative dTDP glycosyl/glycerophosphate transferase	COG1887	Cell wall/membrane/envelope biogenesis|Lipid transport and metabolism	NP_391669.2	-	spsB	-	3890922	3892346	1425	CDS	1.11867	-0.0722468	0.887635	0.923763	0.239683	0.639078	0.741497	-1.05135	0.923763	1.18073	0.741497	1.70539
[truncated: 2,394 more rows]

## Sheet: Table S4 ∆rny + ∆TMD up
Table S4
[truncated: 209 more rows]

## Sheet: Table S5 Riboswitches
Table S5
[truncated: 60 more rows]

[truncated: 1 more sheets: Table S6 ∆TMD specific]
